# Supplementary material for: PhNCO-enabled synthesis of secondary amides from N-(2-aminophenyl)benzamides
Source: Royal Society of Chemistry journal article supplement (doi:10.1039/d3nj04995g), 2023-12-06

## Supporting Information for

### PhNCO-Enabled Synthesis of Secondary Amides from *N*-(2-aminophenyl)benzamides

Karthick Govindan,<sup>[a]</sup># Nian-Qi Chen,<sup>[a]</sup># Alageswaran Jayaram,<sup>[a]</sup> and Wei-Yu Lin<sup>[a-c]</sup>\*

[a] Department of Medicinal and Applied Chemistry, Kaohsiung Medical University, Kaohsiung 80708, Taiwan, ROC.

[b] Department of Medical Research, Kaohsiung Medical University Hospital, Kaohsiung 80708, Taiwan, ROC.

[c] Drug Development and Value Creation Research Centre, Kaohsiung Medical University, Taiwan, ROC.

# Equally contributed

\*Corresponding author: Wei-Yu Lin, [wylin@kmu.edu.tw](mailto:wylin@kmu.edu.tw)

## Table of Contents

|          |                                                                       |              |
|----------|-----------------------------------------------------------------------|--------------|
| <b>1</b> | <b>General information</b>                                            | <b>3</b>     |
| <b>2</b> | <b>General procedure to synthesis of starting materials (1a-t)</b>    | <b>4</b>     |
| <b>3</b> | <b>Further transformations</b>                                        | <b>4-5</b>   |
| <b>4</b> | <b>Spectral characterization</b>                                      | <b>5-18</b>  |
| <b>5</b> | <b>References</b>                                                     | <b>18-19</b> |
| <b>6</b> | <b><math>^1\text{H}</math> and <math>^{13}\text{C}</math> spectra</b> | <b>20-96</b> |

## 1. General information

All chemicals were purchased from commercial providers (Sigma Aldrich, Alfa Aesar, TCI, and matrix scientific) and used directly without further purification, unless otherwise noted. Well cleaned and oven dried glassware was used for the experiments. Reaction was monitored by Thin Layer Chromatography (TLC), purchased as pre-coated with silica gel 60 F254 from Merck. Column chromatography was carried out using the silica gel 230-400 mesh (purchased from Merck) with mixture of ethyl acetate/hexane or hexane as the eluent.  $^1\text{H}$  NMR spectra were recorded on 400 MHz,  $^{13}\text{C}$ -NMR spectra were recorded on 100 MHz, Varian mercury spectrometer using  $\text{CDCl}_3$  or  $\text{DMSO}-d_6$  as solvent. The spectra were recorded and presented in chemical shifts (ppm) with tetramethylsilane (TMS) used as internal standard. Multiplicities were provided in s (singlet), d (doublet), t (triplet), q (quartet), br (broad single), m (multiplet), dd (doublet of doublet) and dt (doublet of triplet). Coupling constants (J) were reported in Hz. All the compounds were characterized by ESI mass on Thermo Finnigan (TRACEGC- POLARISQ) and HRMS (ESI+ mode) on JMS-700 spectrometer. Melting points were determined using Fargo instruments.

## 2. General procedure to synthesis of starting materials (1a-t) <sup>1 2 3 4 5</sup>

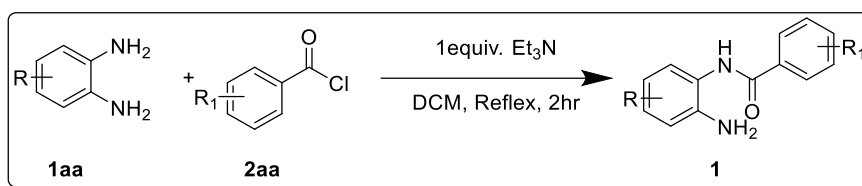

An oven-dried round-bottomed flask (100 mL) equipped with a stir bar was charged with amine (**1aa**) (5 mmol, 2.0 equiv.), triethylamine (1.0 equiv.) and dichloromethane (20 mL), placed under nitrogen, and subjected to three evacuation/backfilling cycles under high vacuum. Acyl chloride (**2aa**) (1.2 equiv.) was added dropwise to the reaction mixture with vigorous stirring at 0 °C, and the reaction mixture was stirred 2hr at reflux. After the indicated time, the reaction mixture was diluted with Et<sub>2</sub>O (10 mL) and filtered. The organic layer was washed with HCl (1.0 N, 10 mL), brine (10 mL), and the organic layer was dried over anhydrous MgSO<sub>4</sub>, filtered, and concentrated under vacuum. The crude product was purified by column chromatography (Hexane/EtOAc, 4/1, silica gel).

## 3. Further transformations <sup>6,7</sup>

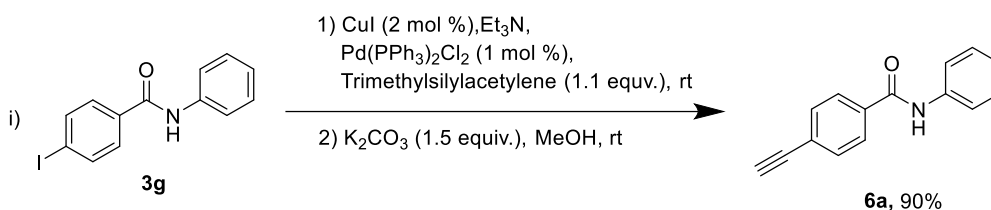

In a dry round-bottomed flask, a solution of CuI (2.0 mol %), Pd(PPh<sub>3</sub>)<sub>2</sub>Cl<sub>2</sub> (1.0 mol %), and **3g** (0.2 mmol, 1.0 equiv.) in 300 μL of Et<sub>3</sub>N was added to trimethylsilylacetylene (1.1 equiv.) dropwise under a nitrogen atmosphere. The mixture was stirred at room temperature until the starting materials were completely consumed. The reaction mixture was then filtered with a short ciliate and removed the solvent in vacuum. The resulting crude product was dissolved in 2 mL of methanol and added with K<sub>2</sub>CO<sub>3</sub> (1.5 equiv.). The reaction mixture was diluted with Et<sub>2</sub>O (2 mL) after stirred at room temperature for 2 h. After washing with water

(15 mL) and drying over anhydrous  $\text{Na}_2\text{SO}_4$ , the residue was concentrated under reduced pressure and purified by column chromatography to afford the **6a**.

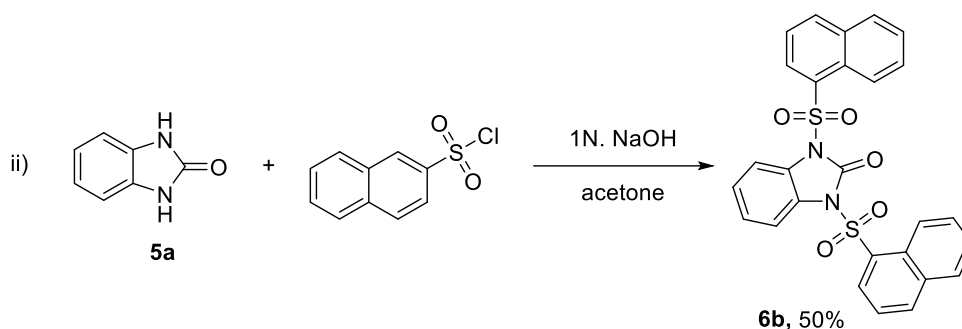

1,3-dihydro-2H-benzo[d]imidazol-2-one (**5a**) (0.2 mmol) was suspended in acetone (2 ml) in a three-neck round bottomed flask fitted with an air condenser and two dropping funnels. In one dropping funnel was taken 1 N NaOH solution (2 ml) and in the other a solution of naphthalene-2-sulfonyl chloride (2.0 equiv.) in acetone. To the suspension of (**5a**) in acetone was added 1 N NaOH solution and naphthalene-2-sulfonyl chloride, dropwise with constant stirring. The temperature was maintained at 20 to 30°C. The mixture was stirred for one hour. Acetone was removed in vacuo, the residue washed with water and recrystallized from chloroform and methanol (3:1) to afford **6a**.

#### 4. Spectral characterization

*N*-(2-aminophenyl)-4-iodobenzamide (**1g**): The title compound was synthesized

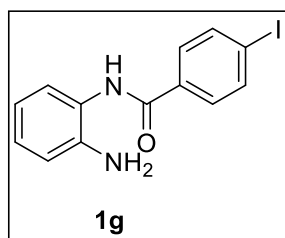

according to the general procedure. The crude mixture was purified using column chromatography by eluting with ethyl acetate/hexane (1:4) and obtained as a yellow solid (1127 mg, 84%); Mp. 204- 206 °C;  $^1\text{H-NMR}$  (400 MHz,  $\text{DMSO-d}_6$ )  $\delta$  9.69

(bs, 1H), 7.92-7.87 (m, 2H), 7.76-7.69 (m, 2H), 7.13 (d,  $J = 4.0$  Hz, 1H), 6.96 (t,  $J = 4.0$  Hz, 1H), 6.76 (d,  $J = 8.0$  Hz, 1H), 6.57 (t,  $J = 8.0$  Hz, 1H), 4.89 (bs, 2H);  $^{13}\text{C-NMR}$  (100 MHz,  $\text{DMSO-d}_6$ )  $\delta$  164.9, 143.7, 137.6, 134.2, 131.7, 127.2, 130.4, 127.1, 123.4, 116.6, 116.5. HRMS (HR-EI) $m/z$ :  $[\text{M}]^+$  calcd for  $\text{C}_{13}\text{H}_{11}\text{IN}_2\text{O}$ , 337.9916; found, 337.9909.

**methyl 4-(2-aminophenyl)carbamoylbenzoate (1j):** The title compound was

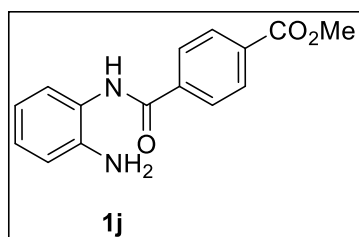

synthesized according to the general procedure. The crude mixture was purified using column chromatography by eluting with ethyl acetate/hexane (1:4) and obtained as a yellow solid (1073 mg, 80%); Mp.

195–197 °C;  $^1\text{H-NMR}$  (400 MHz,  $\text{DMSO-}d_6$ )  $\delta$  9.82 (bs, 1H), 8.07 (q,  $J = 8.4$  Hz, 4H), 7.16 (d,  $J = 8.0$  Hz, 1H), 6.97 (t,  $J = 8.0$  Hz, 1H), 6.77 (d,  $J = 8.0$  Hz, 1H), 6.58 (t,  $J = 16.0$  Hz, 1H), 4.92 (bs, 2H), 3.88 (s, 3H);  $^{13}\text{C-NMR}$  (100 MHz,  $\text{DMSO-}d_6$ )  $\delta$  166.2, 165.0, 143.7, 139.3, 132.3, 129.6, 129.5, 128.6, 127.2, 123.3, 116.6, 116.5, 52.8. HRMS (HR-El)m/z:  $[\text{M}]^+$  calcd for  $\text{C}_{15}\text{H}_{14}\text{N}_2\text{O}_3$ , 270.1004; found, 270.1001.

***N*-(2-aminophenyl)adamantane-1-carboxamide (1o):** The title compound was

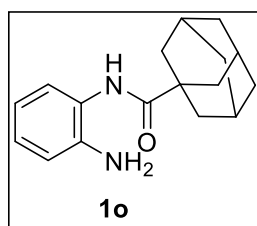

synthesized according to the general procedure. The crude mixture was purified using column chromatography by eluting with ethyl acetate/hexane (1:4) and obtained as a yellow solid (1087 mg, 81%); Mp. 161–163 °C;  $^1\text{H-NMR}$  (400 MHz,  $\text{DMSO-}d_6$ )  $\delta$  8.61 (bs, 1H), 6.99 (dd,  $J = 8.0$  Hz, 1.2Hz, 1H), 6.90 (t,  $J = 8.0$  Hz, 1H), 6.72 (dd,  $J = 8.0$  Hz, 0.8Hz, 1H), 6.54 (td,  $J = 8.0$  Hz, 1.6Hz, 1H), 4.60 (bs, 2H), 2.00 (s, 3H), 1.90 (d,  $J = 3.2$  Hz, 6H), 1.69 (s, 6H);  $^{13}\text{C-NMR}$  (100 MHz,  $\text{DMSO-}d_6$ )  $\delta$  176.4, 143.4, 127.0, 126.5, 124.3, 116.9, 116.6, 41.0, 39.1, 36.6, 28.2. HRMS (HR-El)m/z:  $[\text{M}]^+$  calcd for  $\text{C}_{17}\text{H}_{22}\text{N}_2\text{O}$ , 270.1732; found, 270.1728.

***N*-(2-aminophenyl)-2-(4-isobutylphenyl)propenamide (1p):** The title compound was

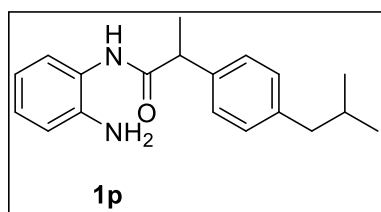

synthesized according to the general procedure. The crude mixture was purified using column chromatography by eluting with ethyl acetate/hexane (1:4) and obtained as a yellow solid (939 mg, 70%); Mp.

176–178 °C; <sup>1</sup>H-NMR (400 MHz, DMSO- d<sub>6</sub>) δ 9.21 (bs, 1H), 7.30 (d, *J* = 4.0 Hz, 2H), 7.10 (d, *J* = 4.0 Hz, 3H), 6.87 (t, *J* = 8.0 Hz, 1H), 6.68 (d, *J* = 8.0 Hz, 1H), 6.51 (t, *J* = 8.0 Hz, 1H), 4.70 (bs, 2H), 3.83 (d, *J* = 4.0 Hz, 1H), 2.40 (d, *J* = 8.0 Hz, 2H), 1.84- 1.75 (m, 1H ), 1.39 (d, *J* = 8.0 Hz, 3H), 0.84 (d, *J* = 8.0 Hz, 6H); <sup>13</sup>C-NMR (100 MHz, DMSO- d<sub>6</sub>) δ 172.9, 142.3, 139.9, 139.8, 129.3, 127.4, 126.3, 125.6, 123.8, 116.7, 116.3, 45.4, 44.7, 30.1, 22.6, 19.1. HRMS (HR-EI)m/z: [M]<sup>+</sup> calcd for C<sub>19</sub>H<sub>24</sub>N<sub>2</sub>O, 296.1889; found, 296.1891.

***N*-(2-amino-4-(tert-butyl)phenyl)benzamide (1r):** The title compound was

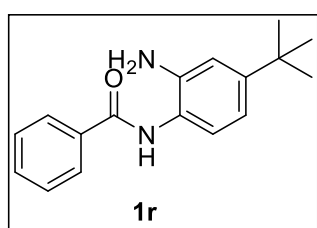

synthesized according to the general procedure. The crude mixture was purified using column chromatography by eluting with ethyl acetate/hexane (1:4) and obtained as a yellow solid (1154 mg, 86%); Mp. 189–191 °C; <sup>1</sup>H-NMR

(400 MHz, DMSO- d<sub>6</sub>) δ 9.60 (bs, 1H), 7.97 (d, *J* = 8.0 Hz, 2H), 7.57-7.49 (m, 3H), 7.08 (d, *J* = 8.0 Hz, 1H), 6.83 (d, *J* = 4.0 Hz, 1H), 6.64 (dd, *J* = 8.0 Hz, 4.0 Hz, 1H), 4.79 (bs, 2H), 1.25 (s, 9H); <sup>13</sup>C-NMR (100 MHz, DMSO- d<sub>6</sub>) δ 165.7, 149.4, 142.9, 135.1, 131.7, 128.7, 128.2, 126.6, 121.4, 113.9, 113.6, 34.5, 31. HRMS (HR-EI)m/z: [M]<sup>+</sup> calcd for C<sub>17</sub>H<sub>20</sub>N<sub>2</sub>O, 268.1576; found, 268.1569.

***N*-(2-amino-4-(trifluoromethyl)phenyl)benzamide (1s):** The title compound was

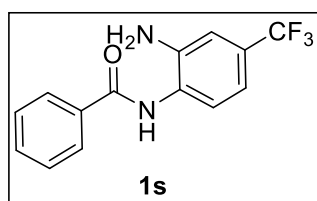

synthesized according to the general procedure. The crude mixture was purified using column chromatography by eluting with ethyl acetate/hexane (1:4) and obtained as a yellow solid (1100 mg, 82%); Mp. 196–198 °C; <sup>1</sup>H-NMR (400

MHz, DMSO- d<sub>6</sub>) δ 9.67 (bs, 1H), 7.98 (d, *J* = 8.0 Hz, 2H), 7.57-7.48 (m, 4H), 7.27 (dd, *J* = 8.0 Hz, 4.0 Hz, 1H), 6.86 (d, *J* = 8.0 Hz, 1H), 5.65 (bs, 2H); <sup>13</sup>C-NMR (100 MHz, DMSO- d<sub>6</sub>) δ 166.2, 147.3, 134.8, 132.0, 128.7, 128.3, 126.8, 124.3 (q, *J*<sub>C-F</sub> = 241Hz), 123.9 (d,

$J_{C-F} = 37\text{Hz}$ ), 122.7, 116.0, 115.7 (d,  $J_{C-F} = 32\text{Hz}$ ). HRMS (HR-EI)m/z:  $[M]^+$  calcd for  $C_{14}H_{11}F_3N_2O$ , 280.0823; found, 280.0816.

***N*-phenyl benzamide (3a)**<sup>8</sup>: The title compound was synthesized according to the

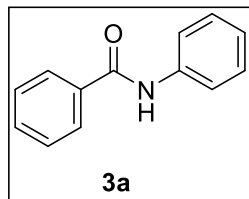

general procedure. The crude mixture was purified using column chromatography by eluting with ethyl acetate/hexane (1:19) and obtained as a bright white solid (34 mg, 85%); <sup>1</sup>H-

NMR (400 MHz, DMSO- $d_6$ )  $\delta$  10.22 (bs, 1H), 7.95-7.92 (m, 2H), 7.76 (d,  $J = 7.6$  Hz, 2H), 7.59-7.49 (m, 3H), 7.33 (t,  $J = 4.0$  Hz, 2H), 7.08 (t,  $J = 7.6$  Hz, 1H); <sup>13</sup>C-NMR (100 MHz, DMSO- $d_6$ )  $\delta$  166.0, 139.6, 135.4, 132.0, 129.0, 128.8, 128.1, 124.1, 120.8.

**4-(*tert*-butyl)-*N*-phenyl benzamide (3b)**<sup>8</sup>: The title compound was synthesized

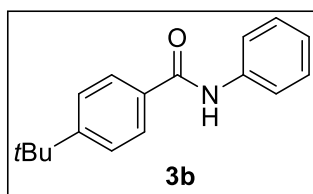

according to the general procedure. The crude mixture was purified using column chromatography by eluting with ethyl acetate/hexane (1:19) and obtained as a bright white

solid (44 mg, 87%); <sup>1</sup>H-NMR (400 MHz, DMSO-  $d_6$ )  $\delta$  10.16 (bs, 1H), 7.88 (d,  $J = 8.4$  Hz, 2H), 7.77 (d,  $J = 7.6$  Hz, 2H), 7.54 (d,  $J = 8.4$  Hz, 2H), 7.34 (t,  $J = 7.6$  Hz, 2H), 7.08 (d,  $J = 7.2$  Hz, 1H); <sup>13</sup>C-NMR (100 MHz, DMSO-  $d_6$ )  $\delta$  165.9, 154.8, 139.7, 132.7, 129.0, 127.9, 125.6, 124.0, 120.7, 35.1, 31.4.

**4-ethyl-*N*-phenylbenzamide (3c)**<sup>9</sup>: The title compound was synthesized according to

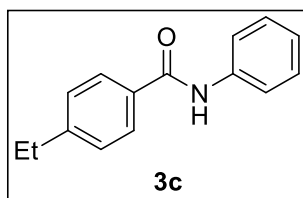

the general procedure. The crude mixture was purified using column chromatography by eluting with ethyl acetate/hexane (1:19) and obtained as a bright white solid

(39 mg, 86%); <sup>1</sup>H-NMR (400 MHz, DMSO-  $d_6$ )  $\delta$  10.15 (bs, 1H), 7.88 (d,  $J = 8.0$  Hz, 2H), 7.77 (d,  $J = 8.4$  Hz, 2H), 7.37-7.32 (m, 4H), 7.09 (t,  $J = 7.6$  Hz, 1H), 2.68 (q,  $J = 7.6$  Hz, 2H), 1.21 (t,  $J = 7.2$  Hz, 3H); <sup>13</sup>C-NMR (100 MHz, DMSO-  $d_6$ )  $\delta$  165.4, 147.7, 139.3, 132.4, 128.6, 127.8, 127.7, 123.5, 120.3, 28.1, 15.4.



**4-fluoro-*N*-phenylbenzamide (3d)**<sup>8</sup>: The title compound was synthesized according

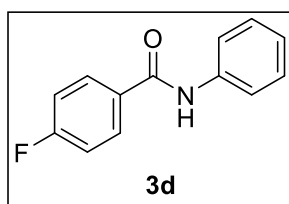

to the general procedure. The crude mixture was purified using column chromatography by eluting with ethyl acetate/hexane (1:19) and obtained as a bright white solid

(40 mg, 94%); <sup>1</sup>H-NMR (400 MHz, DMSO- d<sub>6</sub>) δ 10.25 (bs, 1H), 8.05-8.02 (m, 2H), 7.77-7.75 (m, 2H), 7.39-7.33 (m, 4H), 7.13-7.09 (m, 1H); <sup>13</sup>C-NMR (100 MHz, DMSO-*d*<sub>6</sub>) δ 165.7, 164.9 (d, *J*<sub>C-F</sub> = 247.0Hz), 139.4, 131.8, 130.8, (d, *J*<sub>C-F</sub> = 9.0Hz), 129.1, 124.2, 120.9, 115.8 (d, *J*<sub>C-F</sub> = 21 Hz).

**4-chloro-*N*-phenylbenzamide (3e)**<sup>8</sup>: The title compound was synthesized according to

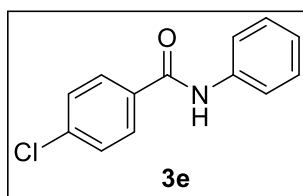

the general procedure. The crude mixture was purified using column chromatography by eluting with ethyl acetate/hexane (1:19) and obtained as a bright white solid

(39 mg, 85%); <sup>1</sup>H-NMR (400 MHz, DMSO- d<sub>6</sub>) δ 10.30 (bs, 1H), 7.98 (d, *J* = 8.4 Hz, 2H), 7.76 (d, *J* = 7.2 Hz, 2H), 7.61 (d, *J* = 8.8 Hz, 2H), 7.36 (t, *J* = 7.6 Hz, 2H), 7.11 (t, *J* = 7.6 Hz, 1H); <sup>13</sup>C-NMR (100 MHz, DMSO- d<sub>6</sub>) δ 164, 139.0, 136.4, 133.6, 129.6, 128.6, 128.5, 123.9, 120.4.

**4-bromo-*N*-phenylbenzamide (3f)**<sup>8</sup>: The title compound was synthesized according

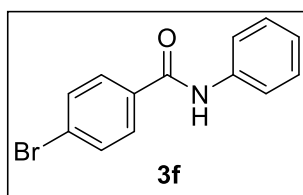

to the general procedure. The crude mixture was purified using column chromatography by eluting with ethyl acetate/hexane (1:19) and obtained as a bright white solid

(49 mg, 88%); <sup>1</sup>H-NMR (400 MHz, DMSO- d<sub>6</sub>) δ 10.28 (bs, 1H), 7.89 (d, *J* = 8.0 Hz, 2H), 7.75-7.72 (m, 4H), 7.34 (t, *J* = 8.0 Hz, 2H), 7.09 (t, *J* = 7.6 Hz, 1H); <sup>13</sup>C-NMR (100 MHz, DMSO- d<sub>6</sub>) δ 165.0, 139.4, 134.5, 131.8, 130.2, 129.1, 125.7, 124.3, 120.9.

**4-iodo-*N*-phenylbenzamide (3g)**<sup>10</sup>: The title compound was synthesized according to

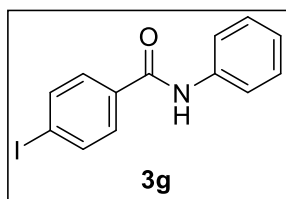

the general procedure. The crude mixture was purified using column chromatography by eluting with ethyl acetate/hexane (1:19) and obtained as a bright white solid (43 mg, 93%); <sup>1</sup>H-

NMR (400 MHz, DMSO- *d*<sub>6</sub>) δ 10.27 (bs, 1H), 7.91-7.87 (m, 2H), 7.74-7.71 (m, 4H), 7.33 (t, *J* = 7.2 Hz, 2H), 7.09 (t, *J* = 8.0 Hz, 1H); <sup>13</sup>C-NMR (100 MHz, DMSO- *d*<sub>6</sub>) δ 165.2, 139.4, 137.7, 134.7, 131.8, 130.2, 130.0, 129.1, 124.2, 120.8, 99.7.

**4-nitro-*N*-phenylbenzamide (3h)**<sup>9</sup>: The title compound was synthesized according to

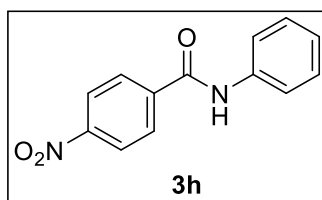

the general procedure. The crude mixture was purified using column chromatography by eluting with ethyl acetate/hexane (1:19) and obtained as a bright white solid

(42 mg, 87%); <sup>1</sup>H-NMR (400 MHz, DMSO- *d*<sub>6</sub>) δ 10.60 (bs, 1H), 8.37 (d, *J* = 8.0 Hz, 2H), 8.19 (d, *J* = 12.0 Hz, 2H), 7.78 (d, *J* = 8.0 Hz, 2H), 7.38 (t, *J* = 8.4 Hz, 2H), 7.14 (t, *J* = 7.2 Hz, 1H); <sup>13</sup>C-NMR (100 MHz, DMSO- *d*<sub>6</sub>) δ 164.3, 149.6, 141.1, 139.1, 129.6, 129.2, 124.6, 124.0, 120.9.

***N*-phenyl-4-(trifluoromethyl)benzamide (3i)**<sup>8</sup>: The title compound was synthesized

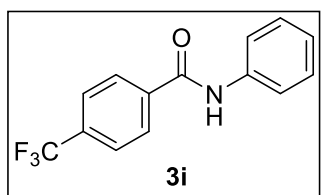

according to the general procedure. The crude mixture was purified using column chromatography by eluting with ethyl acetate/hexane (1:19) and obtained as a bright white

solid (38 mg, 71%); <sup>1</sup>H-NMR (400 MHz, DMSO- *d*<sub>6</sub>) δ 10.55 (bs, 1H), 8.24 (d, *J* = 8.0 Hz, 2H), 8.00 (d, *J* = 8.0 Hz, 2H), 7.87 (d, *J* = 7.6 Hz, 2H), 7.46 (t, *J* = 8.0 Hz, 2H), 7.22 (t, *J* = 8.0 Hz, 1H); <sup>13</sup>C-NMR (100 MHz, DMSO-*d*<sub>6</sub>) δ 164.8, 139.2, 131.9, 131.6 (d, *J*<sub>C-F</sub> = 32 Hz), 139.1, 129.0, 125.9 (q, *J*<sub>C-F</sub> = 292 Hz), 125.9, 125.8, 124.5 (d, *J*<sub>C-F</sub> = 7.0Hz), 120.9.

**methyl 4-(phenyl carbamoyl)benzoate (3j)**<sup>8</sup>: The title compound was synthesized

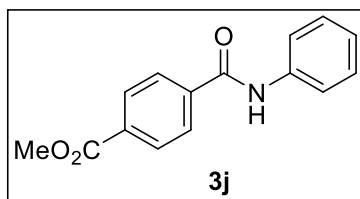

according to the general procedure. The crude mixture was purified using column chromatography by eluting with ethyl acetate/hexane (1:19) and obtained as a

bright white solid (30 mg, 60%); <sup>1</sup>H-NMR (400 MHz, DMSO- d<sub>6</sub>) δ 10.44 (bs, 1H), 8.09 (q, *J* = 8.4 Hz, 4H), 7.78 (d, *J* = 8.0 Hz, 2H), 7.37 (t, *J* = 7.6 Hz, 2H), 7.12 (t, *J* = 7.6 Hz, 1H); <sup>13</sup>C-NMR (100 MHz, DMSO- d<sub>6</sub>) δ 165.6, 164.6, 139.0, 138.8, 132.0, 129.1, 128.6, 128.0, 123.9, 120.4, 52.4.

**4-cyano-*N*-phenylbenzamide (3k)**<sup>11</sup>: The title compound was synthesized according

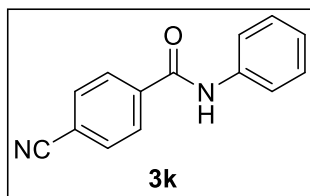

to the general procedure. The crude mixture was purified using column chromatography by eluting with ethyl acetate/hexane (1:19) and obtained as a bright white solid

(36 mg, 80%); <sup>1</sup>H-NMR (400 MHz, DMSO- d<sub>6</sub>) δ 10.47 (bs, 1H), 8.12-8.09 (m, 2H), 8.04-8.02 (m, 2H), 7.76 (d, *J* = 8.0 Hz, 2H), 7.37 (t, *J* = 7.6 Hz, 2H), 7.13 (t, *J* = 7.6 Hz, 1H); <sup>13</sup>C-NMR (100 MHz, DMSO- d<sub>6</sub>) δ 164.1, 139.0, 138.7, 132.5, 128.7, 128.5, 124.1, 120.4, 118.3, 113.8.

***N*-phenyl-1-naphthamide (3l)**<sup>9</sup>: The title compound was synthesized according to

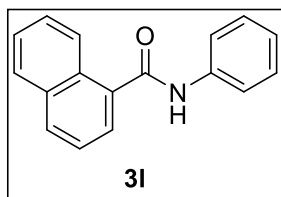

the general procedure. The crude mixture was purified using column chromatography by eluting with ethyl acetate/hexane (1:19) and obtained as a bright white solid (22 mg, 45%); <sup>1</sup>H-

NMR (400 MHz, DMSO- d<sub>6</sub>) δ 10.57 (bs, 1H), 8.20-8.18 (m, 1H), 8.09 (d, *J* = 8.0 Hz, 1H), 8.05-8.02 (m, 1H), 7.82 (d, *J* = 7.6 Hz, 2H), 7.76 (d, *J* = 8.0 Hz, 1H), 7.64-7.58 (m, 3H), 7.38 (t, *J* = 7.6 Hz, 2H), 7.13 (t, *J* = 7.2 Hz, 1H); <sup>13</sup>C-NMR (100 MHz, DMSO- d<sub>6</sub>) δ 167.2, 139.3, 134.7, 133.1, 130.0, 129.6, 128.7, 128.3, 126.9, 126.3, 125.4, 125.1, 125.0, 123.6, 119.8.

***N*-phenylthiophene-2-carboxamide (3m)**<sup>8</sup>: The title compound was synthesized

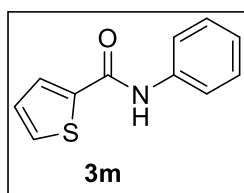

according to the general procedure. The crude mixture was purified using column chromatography by eluting with ethyl acetate/hexane (1:19) and obtained as a bright white solid (37

mg, 91%); <sup>1</sup>H-NMR (400 MHz, DMSO- d<sub>6</sub>) δ 10.19 (bs, 1H), 8.00 (dd, *J* = 3.6 Hz, 0.8 Hz, 1H), 7.84 (dd, *J* = 4.8 Hz, 1.2 Hz, 1H), 7.70 (d, *J* = 7.6 Hz, 2H), 7.33 (t, *J* = 7.2 Hz, 2H), 7.21 (q, *J* = 3.6 Hz, 1H), 7.08 (t, *J* = 7.2 Hz, 1H); <sup>13</sup>C-NMR (100 MHz, DMSO- d<sub>6</sub>) δ 160.0, 140.1, 138.7, 131.9, 129.2, 128.7, 128.1, 123.9, 120.5.

***N*-phenyloctanamide (3n)**<sup>9</sup>: The title compound was synthesized according to the general

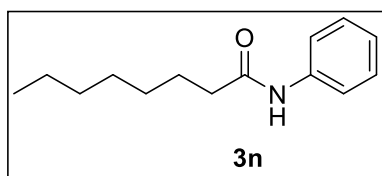

procedure. The crude mixture was purified using column chromatography by eluting with ethyl acetate/hexane (1:19) and obtained as a bright white solid (26 mg, 80%);

<sup>1</sup>H-NMR (400 MHz, DMSO- d<sub>6</sub>) δ 9.82 (bs, 1H), 7.58 (d, *J* = 8.0 Hz, 2H), 7.27 (t, *J* = 7.2 Hz, 2H), 7.01 (t, *J* = 6.0 Hz, 1H), 2.28 (t, *J* = 7.6 Hz, 2H), 1.58 (t, *J* = 7.2 Hz, 2H), 1.34-1.22 (m, 8H), 0.86 (t, *J* = 6.8 Hz, 3H); <sup>13</sup>C-NMR (100 MHz, DMSO- d<sub>6</sub>) δ 171.7, 139.8, 129.0, 123.3, 119.4, 36.8, 31.6, 29.1, 28.9, 25.6, 22.5, 14.4.

***N*-phenyladamantane-1-carboxamide (3o)**: The title compound was synthesized

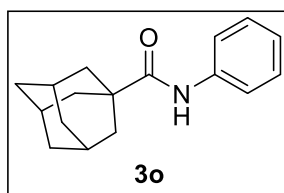

according to the general procedure. The crude mixture was purified using column chromatography by eluting with ethyl acetate/hexane (1:19) and obtained as a bright white solid

(27 mg, 52%); Mp. 132–134 °C; <sup>1</sup>H-NMR (400 MHz, DMSO- d<sub>6</sub>) δ 9.07 (bs, 1H), 7.64 (d, *J* = 8.0 Hz, 2H), 7.27 (t, *J* = 8.0 Hz, 2H), 7.02 (t, *J* = 8.0 Hz, 1H), 2.02-1.90 (m, 9H), 1.71-1.70 (m, 6H); <sup>13</sup>C-NMR (100 MHz, DMSO- d<sub>6</sub>) δ 176.3, 139.8, 128.8, 123.5, 120.6, 41.3, 38.7, 36.5, 28.1. HRMS (HR-EI)m/z: [M]<sup>+</sup> calcd for C<sub>17</sub>H<sub>21</sub>NO, 255.1623; found, 255.1621.

**2-(4-isobutylphenyl)-*N*-phenylpropanamide (3p):** The title compound was

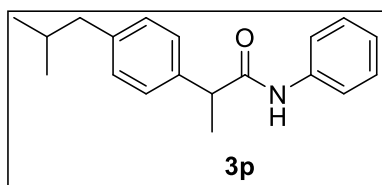

synthesized according to the general procedure. The crude mixture was purified using column chromatography by eluting with ethyl acetate/hexane

(1:19) and obtained as a bright white solid (39 mg, 70%); Mp. 167–169 °C; <sup>1</sup>H-NMR (400 MHz, DMSO-*d*<sub>6</sub>) δ 10.00 (bs, 1H), 7.58 (d, *J* = 8.0 Hz, 2H), 7.29–7.24 (m, 4H), 7.10 (d, *J* = 8.0 Hz, 2H), 7.01 (t, *J* = 4.0 Hz, 1H), 3.79 (q, *J* = 8.0 Hz, 1H), 2.39 (d, *J* = 8.0 Hz, 2H), 1.82–1.76 (m, 1H), 1.39 (d, *J* = 8.0 Hz, 3H), 0.84 (d, *J* = 8.0 Hz, 6H); <sup>13</sup>C-NMR (100 MHz, DMSO-*d*<sub>6</sub>) δ 172.4, 139.5, 139.3, 139.1, 128.9, 128.7, 127.0, 123.1, 119.1, 45.6, 44.2, 29.6, 22.2, 18.6. HRMS (HR-EI)*m/z*: [*M*]<sup>+</sup> calcd for C<sub>19</sub>H<sub>23</sub>NO, 281.1780; found, 281.1785.

***N*-(4-acetylphenyl)benzamide (3aa)** <sup>12</sup>: The title compound was synthesized

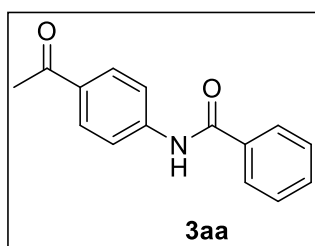

according to the general procedure. The crude mixture was purified using column chromatography by eluting with ethyl acetate/hexane (1:19) and obtained as a bright white solid (25 mg, 53%); <sup>1</sup>H-NMR (400 MHz, DMSO-*d*<sub>6</sub>) δ 10.56

(bs, 1H), 7.99–7.93 (m, 6H), 7.62–7.53 (m, 3H), 2.55 (s, 3H); <sup>13</sup>C-NMR (100 MHz, DMSO-*d*<sub>6</sub>) δ 197.1, 166.4, 144.0, 135.0, 132.5, 132.3, 129.7, 128.9, 128.2, 119.9, 26.9.

***N*-(benzo[*d*][1,3]dioxol-5-yl)benzamide (3ab)** <sup>13</sup>: The title compound was

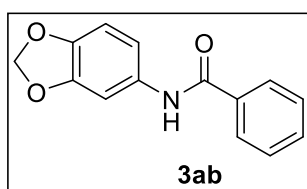

synthesized according to the general procedure. The crude mixture was purified using column chromatography by eluting with ethyl acetate/hexane (1:19) and obtained as a

bright white solid (28 mg, 57%); <sup>1</sup>H-NMR (400 MHz, DMSO-*d*<sub>6</sub>) δ 10.11 (bs, 1H), 7.89–7.87 (m, 2H), 7.54–7.46 (m, 3H), 7.40 (d, *J* = 2.0 Hz, 1H), 7.15 (dd, *J* = 8.4 Hz, 2.0 Hz,

1H), 6.86 (d,  $J = 8.0$  Hz, 1H), 5.97 (s, 2H);  $^{13}\text{C-NMR}$  (100 MHz,  $\text{DMSO-}d_6$ )  $\delta$  165.8, 147.5, 143.8, 135.5, 134.0, 132.0, 128.9, 128.1, 113.9, 108.4, 103.0, 101.5.

***N*-(4-chlorophenyl)benzamide (3ac)**<sup>8</sup>: The title compound was synthesized

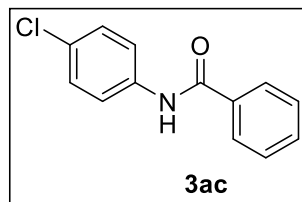

according to the general procedure. The crude mixture was purified using column chromatography by eluting with ethyl acetate/hexane (1:19) and obtained as a bright white solid

(41 mg, 88%);  $^1\text{H-NMR}$  (400 MHz,  $\text{DMSO-}d_6$ )  $\delta$  10.35 (s, 1H), 7.96- 7.93 (m, 2H), 7.82 (dt,  $J = 8.7$  Hz, 3.4 Hz, 2H), 7.62- 7.52 (m, 3H), 7.41 (dt,  $J = 8.8$  Hz, 3.2 Hz, 2H);  $^{13}\text{C-NMR}$  (100 MHz,  $\text{DMSO-}d_6$ )  $\delta$  166.1, 138.6, 135.2, 132.1, 129.0, 128.9, 128.1, 127.7, 122.3.

***N*-(4-bromophenyl)benzamide (3ad)**<sup>8</sup>: The title compound was synthesized according

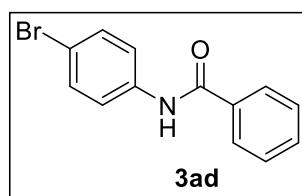

to the general procedure. The crude mixture was purified using column chromatography by eluting with ethyl acetate/hexane (1:19) and obtained as a bright white solid

(50 mg, 90%);  $^1\text{H-NMR}$  (400 MHz,  $\text{DMSO-}d_6$ )  $\delta$  10.35 (s, 1H), 7.96- 7.93 (m, 2H), 7.78 (dd,  $J = 8.9$  Hz, 1.6 Hz, 2H), 7.60 (tt,  $J = 7.2$  Hz, 1.4 Hz, 1H), 7.55- 7.51 (m, 4H).  $^{13}\text{C-NMR}$  (100 MHz,  $\text{DMSO-}d_6$ )  $\delta$  166.1, 139.0, 135.1, 132.2, 131.9, 128.9, 128.1, 122.6, 115.8.

***N*-(4-ethoxyphenyl)benzamide (3ae)**<sup>14</sup>: The title compound was synthesized

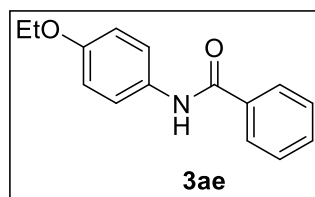

according to the general procedure. The crude mixture was purified using column chromatography by eluting with ethyl acetate/hexane (1:19) and obtained as a bright white

solid (34 mg, 70%);  $^1\text{H-NMR}$  (400 MHz,  $\text{DMSO-}d_6$ )  $\delta$  10.09 (s, 1H), 7.95- 7.92 (m, 2H), 7.65 (dt,  $J = 9.0$  Hz, 3.4 Hz, 2H), 7.60- 7.49 (m, 3H), 6.91 (dt,  $J = 9.1$  Hz, 3.4 Hz, 2H), 4.01 (q,  $J = 7.0$  Hz, 2H), 1.32 (t,  $J = 6.9$  Hz, 3H);  $^{13}\text{C-NMR}$  (100 MHz,  $\text{DMSO-}d_6$ )  $\delta$  165.5, 155.2, 135.5, 132.5, 131.8, 128.8, 128.0, 122.4, 114.7, 63.5.

**4-(tert-butyl)-N-(4-methoxyphenyl)benzamide (3af):** The title compound was

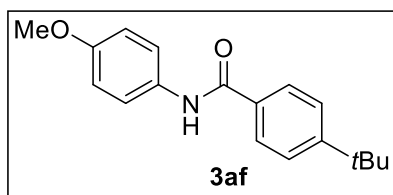

synthesized according to the general procedure. The crude mixture was purified using column chromatography by eluting with ethyl

acetate/hexane (1:19) and obtained as a bright white solid (45 mg, 80%); Mp. 139–141 °C; <sup>1</sup>H-NMR (400 MHz, DMSO-*d*<sub>6</sub>) δ 10.01 (s, 1H), 7.85 (d, *J* = 8.3 Hz, 2H), 7.64 (d, *J* = 8.9 Hz, 2H), 7.51 (d, *J* = 8.3 Hz, 2H), 6.90 (dt, *J* = 8.9 Hz, 3.3 Hz, 2H), 3.72 (s, 3H), 1.3 (s, 9H); <sup>13</sup>C-NMR (100 MHz, DMSO-*d*<sub>6</sub>) δ 165.5, 155.9, 154.6, 132.77, 132.75, 127.8, 125.5, 122.3, 114.1, 55.6, 35.1, 31.2. HRMS (HR-El)m/z: [M]<sup>+</sup> calcd for C<sub>18</sub>H<sub>21</sub>NO<sub>2</sub>, 283.1572; found, 283.1569.

**4-(tert-butyl)-N-(p-tolyl)benzamide (3ag):** The title compound was synthesized

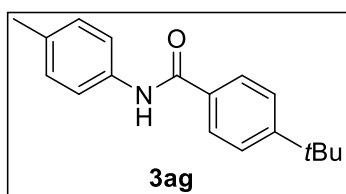

according to the general procedure. The crude mixture was purified using column chromatography by eluting with ethyl acetate/hexane (1:19) and obtained as a

bright white solid (51 mg, 95%); Mp. 128–130 °C; <sup>1</sup>H-NMR (400 MHz, DMSO-*d*<sub>6</sub>) δ 10.07 (s, 1H), 7.87 (d, *J* = 8.2 Hz, 2H), 7.65 (d, *J* = 8.2 Hz, 2H), 7.53 (d, *J* = 8.3 Hz, 2H), 7.14 (d, *J* = 8.2 Hz, 2H), 2.207 (s, 3H), 1.32 (s, 9H); <sup>13</sup>C-NMR (100 MHz, DMSO-*d*<sub>6</sub>) δ 165.7, 154.7, 137.2, 132.9, 132.8, 129.4, 127.9, 125.6, 120.7, 35.1, 31.4, 20.9. HRMS (HR-El)m/z: [M]<sup>+</sup> calcd for C<sub>18</sub>H<sub>21</sub>NO, 267.1623; found, 267.1621.

**4-(tert-butyl)-N-(4-fluorophenyl)benzamide (3ah):** The title compound was

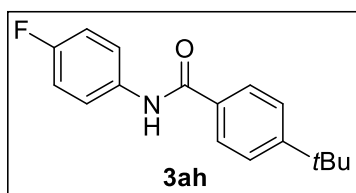

synthesized according to the general procedure. The crude mixture was purified using column chromatography by eluting with ethyl acetate/hexane

(1:19) and obtained as a bright white solid (50 mg, 92%); Mp. 134–137 °C; <sup>1</sup>H-NMR (400 MHz, DMSO-*d*<sub>6</sub>) δ 10.22 (s, 1H), 7.88 (d, *J* = 8.4 Hz, 2H), 7.78 (dd, *J* = 9.0 Hz, 4.0 Hz,

2H), 7.54 (d,  $J = 8.4$  Hz, 2H), 7.18 (t,  $J = 8.9$  Hz, 2H), 1.31 (s, 9H);  $^{13}\text{C-NMR}$  (100 MHz, DMSO- $d_6$ )  $\delta$  165.8, 159.8 (d,  $J_{\text{C-F}} = 239$  Hz), 154.9, 136.1, 132.5, 127.9, 125.6, 122.5 (d,  $J_{\text{C-F}} = 8.0$  Hz), 115.6 (d,  $J_{\text{C-F}} = 22$  Hz), 35.1, 31.4. HRMS (HR-EI)m/z:  $[\text{M}]^+$  calcd for  $\text{C}_{17}\text{H}_{18}\text{FNO}$ , 271.1372; found, 271.1374.

**1,3-dihydro-2H-benzo[d]imidazol-2-one (5a)** <sup>15</sup>: The title compound was

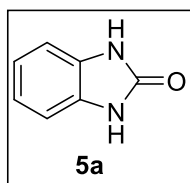

synthesized according to the general procedure. The crude mixture was purified using column chromatography by eluting with ethyl acetate and obtained as a brown solid (23 mg, 86%);  $^1\text{H-NMR}$  (400 MHz, DMSO- $d_6$ )  $\delta$  10.54 (bs, 2H), 6.89 (s, 4H);  $^{13}\text{C-NMR}$  (100 MHz, DMSO- $d_6$ )  $\delta$  155.7, 130.1, 120.8, 108.9.

**4-methyl-1,3-dihydro-2H-benzo[d]imidazol-2-one (5b)** <sup>16</sup>: The title compound was

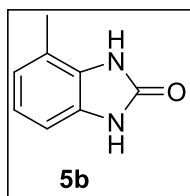

synthesized according to the general procedure. The crude mixture was purified using column chromatography by eluting with ethyl acetate and obtained as a brown solid (23 mg, 78%);  $^1\text{H-NMR}$  (400 MHz, DMSO- $d_6$ )  $\delta$  10.62 (bs, 1H), 10.50 (s, 1H), 6.84- 6.72 (m, 3H),

2.25 (s, 3H);  $^{13}\text{C-NMR}$  (100 MHz, DMSO- $d_6$ )  $\delta$  155.9, 129.7, 129.0, 122.0, 120.8, 118.6, 106.5, 16.6.

**5-(tert-butyl)-1,3-dihydro-2H-benzo[d]imidazol-2-one (5c)** <sup>15</sup>: The title compound

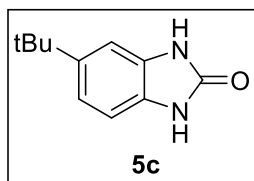

was synthesized according to the general procedure. The crude mixture was purified using column chromatography by eluting with ethyl acetate and obtained as a brown solid (29 mg, 76%);

$^1\text{H-NMR}$  (400 MHz, DMSO- $d_6$ )  $\delta$  10.40 (bs, 2H), 6.95-6.80 (m, 3H), 1.24 (s, 9H);  $^{13}\text{C-NMR}$  (100 MHz, DMSO- $d_6$ )  $\delta$  156.0, 143.6, 130.0, 127.8, 117.6, 108.3, 105.38, 34.7, 32.0.



**5-(trifluoromethyl)-1,3-dihydro-2H-benzo[d]imidazol-2-one (5d)**<sup>15</sup>: The title

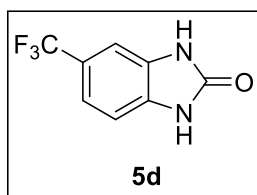

compound was synthesized according to the general procedure.

The crude mixture was purified using column chromatography

by eluting with ethyl acetate and obtained as a brown solid (30

mg, 75%); <sup>1</sup>H-NMR (400 MHz, DMSO-*d*<sub>6</sub>) δ 10.98 (d, *J* = 38.3 Hz, 2H), 7.28 (d, *J* = 8.2 Hz,

1H), 7.16 (s, 1H), 7.09 (d, *J* = 8.1 Hz, 1H); <sup>13</sup>C-NMR (100 MHz, DMSO-*d*<sub>6</sub>) 155.7, 133.3,

130.26, 125.0, 121.5 (d, *J*<sub>C-F</sub> = 32 Hz), 118.3 (q, *J*<sub>C-F</sub> = 218 Hz), 109.0 (d, *J*<sub>C-F</sub> = 20 Hz),

105.3.

**5-methoxy-1,3-dihydro-2H-benzo[d]imidazol-2-one (5e)**: The title compound was

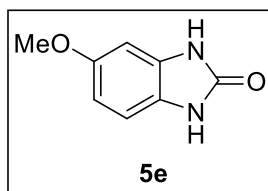

synthesized according to the general procedure. The crude

mixture was purified using column chromatography by eluting

with ethyl acetate and obtained as a brown solid (27 mg, 81%);

Mp. 272–274 °C; <sup>1</sup>H-NMR (400 MHz, DMSO-*d*<sub>6</sub>) δ 10.42 (d, *J* = 14.6 Hz, 2H), 6.77- 6.69

(m, 3H), 2.25 (s, 3H); <sup>13</sup>C-NMR (100 MHz, DMSO-*d*<sub>6</sub>) δ 155.8, 130.3, 129.8, 127.9, 121.3,

109.4, 108.6, 21.5. HRMS (HR-EI)m/z: [M-H]<sup>+</sup> calcd for C<sub>8</sub>H<sub>7</sub>N<sub>2</sub>O<sub>2</sub>, 163.0508; found,

163.0504.

**4-ethynyl-*N*-phenylbenzamide (6a)**: The title compound was synthesized according to

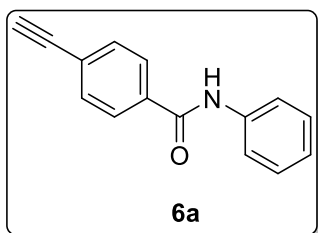

the general procedure. The crude mixture was purified

using column chromatography by eluting with ethyl

acetate and obtained as a white solid (40 mg, 90%); <sup>1</sup>H-

NMR (400 MHz, DMSO-*d*<sub>6</sub>) δ 10.30 (s, 1H), 7.97-7.93 (m,

2H), 7.75 (dd, *J* = 1.4 Hz, 7.6 Hz, 2H), 7.64-7.61 (m, 2H), 7.37-7.32 (m, 2H), 7.12-7.01

(m, 1H); <sup>13</sup>C-NMR (100 MHz, DMSO-*d*<sub>6</sub>) δ 164.7, 138.9, 134.9, 131.7, 128.6, 127.9,

124.7, 123.8, 120.4, 83.0, 82.8. HRMS (HR-EI)m/z: [M+H]<sup>+</sup> calcd for C<sub>15</sub>H<sub>12</sub>NO,

222.0919; found, 222.0924.

**1,3-bis(naphthalen-1-ylsulfonyl)-1,3-dihydro-2H-benzo[d]imidazol-2-one (6b)**<sup>7</sup>: The

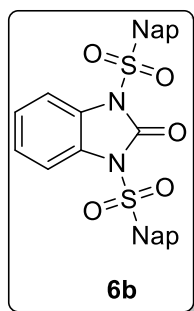

title compound was synthesized according to the general procedure.

The crude mixture was purified using column chromatography by eluting with ethyl acetate and obtained as a white solid (51 mg, 50%); <sup>1</sup>H-NMR (400 MHz, DMSO-*d*<sub>6</sub>) δ 8.75 (d, *J*= 1.7 Hz, 1H), 8.12 (td, *J*= 7.9 Hz, 3.2 Hz, 4H), 7.89-7.67 (m, 7H), 7.54-7.46 (m, 1H), 7.17-

6.96 (m, 5H); <sup>13</sup>C-NMR (100 MHz, DMSO-*d*<sub>6</sub>) δ 150.9, 135.6, 131.8, 130.4, 129.9, 128.4, 126.9, 125.0, 122.5, 122.0, 112.9, 110.5.

## 5. References

- (1) Reddy, M. D.; Blanton, A. N.; Watkins, E. B. Palladium-catalyzed, N-(2-aminophenyl) acetamide-assisted ortho-arylation of substituted benzamides: application to the synthesis of urolithins B, M6, and M7. *The Journal of Organic Chemistry* 2017, **82** (10), 5080-5095.
- (2) Herron, D. K.; Goodson, T.; Wiley, M. R.; Weir, L. C.; Kyle, J. A.; Yee, Y. K.; Tebbe, A. L.; Tinsley, J. M.; Mendel, D.; Masters, J. J. 1, 2-Dibenzamidobenzene inhibitors of human factor Xa. *Journal of medicinal chemistry* 2000, **43** (5), 859-872.
- (3) Tang, Y.-L.; Li, M.-L.; Gao, J.-C.; Sun, Y.; Qu, L.; Huang, F.; Mao, Z.-W. Copper-catalyzed regioselective 2-amination of o-haloanilides with aqueous ammonia. *Tetrahedron Letters* 2021, **69**, 153001.
- (4) Koshio, H.; Hirayama, F.; Ishihara, T.; Shiraki, R.; Shigenaga, T.; Taniuchi, Y.; Sato, K.; Moritani, Y.; Iwatsuki, Y.; Kaku, S. Synthesis and biological activity of novel 1, 2-disubstituted benzene derivatives as factor Xa inhibitors. *Bioorganic & medicinal chemistry* 2005, **13** (4), 1305-1323.
- (5) Wang, L.; Li, C.; Wang, N.; Li, K.; Chen, X.; Yu, X.-Q. Enzyme-mediated domino synthesis of 2-alkylbenzimidazoles in solvent-free system: A green route to heterocyclic compound. *Journal of Molecular Catalysis B: Enzymatic* 2010, **67** (1-2), 16-20.
- (6) Qiu, S.-Q.; Ahmad, T.; Xu, Y.-H.; Loh, T.-P. Palladium-catalyzed cascade intramolecular cyclization and allylation of enynoates with allylic alcohols. *The Journal of Organic Chemistry* 2019, **84** (11), 6729-6736.
- (7) Ahmad, I.; Hameed, S.; Duddeck, H.; Lenzen, S.; Rustenbeck, I.; Ahmad, R. N-arylsulfonyl-benzimidazolones as potential hypoglycemic agents. *Zeitschrift für Naturforschung B* 2002, **57** (3), 349-354.
- (8) Tang, J.-J.; Yu, X.; Yamamoto, Y.; Bao, M. Visible-Light-Promoted Iron-Catalyzed N-Arylation of Dioxazolones with Arylboronic Acids. *ACS Catalysis* 2021, **11** (22), 13955-13961.

- (9) Zhang, J.; Ma, Y.; Ma, Y. Synthesis of Secondary Amides through the Palladium (II)-Catalyzed Aminocarbonylation of Arylboronic Acids with Amines or Hydrazines and Carbon Monoxide. *European Journal of Organic Chemistry* 2018, **2018** (14), 1720-1725.
- (10) Quan, Z. J.; Xia, H. D.; Zhang, Z.; Da, Y. X.; Wang, X. C. Ligand-free CuTC-catalyzed N-arylation of amides, anilines and 4-aminoantipyrene: synthesis of N-arylacrylamides, 4-amido-N-phenylbenzamides and 4-amino (N-phenyl) antipyrenes. *Applied Organometallic Chemistry* 2014, **28** (2), 81-85.
- (11) Micheli, F.; Crippa, L.; Donati, D.; Di Fabio, R.; Leslie, C. A new alternative synthesis of 5-cyanophthalide, a versatile intermediate in the preparation of the antidepressant drug citalopram. *Il Farmaco* 2001, **56** (9), 715-718.
- (12) Farrag, A. M.; Ibrahim, M. H.; Mehany, A. B.; Ismail, M. M. New cyanopyridine-based scaffold as PIM-1 inhibitors and apoptotic inducers: Synthesis and SARs study. *Bioorganic Chemistry* 2020, **105**, 104378.
- (13) Henry, M. C.; Abbinante, V. M.; Sutherland, A. Iron-Catalyzed Regioselective Synthesis of 2-Arylbenzoxazoles and 2-Arylbenzothiazoles via Alternative Reaction Pathways. *European Journal of Organic Chemistry* 2020, **2020** (19), 2819-2826.
- (14) Tang, Y.; Li, M.; Gao, H.; Rao, G.; Mao, Z. Efficient Pd-Catalyzed Hydrodehalogenation of o-Haloanilides in Water. *Synlett* 2020, **31** (11), 1121-1125.
- (15) Ognyanov, V. I.; Balan, C.; Bannon, A. W.; Bo, Y.; Dominguez, C.; Fotsch, C.; Gore, V. K.; Klionsky, L.; Ma, V. V.; Qian, Y.-X. Design of potent, orally available antagonists of the transient receptor potential vanilloid 1. Structure- activity relationships of 2-piperazin-1-yl-1 H-benzimidazoles. *Journal of medicinal chemistry* 2006, **49** (12), 3719-3742.
- (16) Kilchmann, F.; Marcaida, M. J.; Kotak, S.; Schick, T.; Boss, S. D.; Awale, M.; Gonczy, P.; Reymond, J.-L. Discovery of a selective aurora a kinase inhibitor by virtual screening. *Journal of medicinal chemistry* 2016, **59** (15), 7188-7211.

# Proton and Carbon Spectra

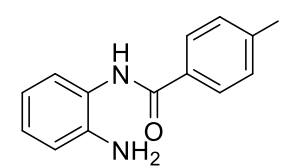

**1g**

Solvent: DMSO-*d*<sub>6</sub>  
Spectrometer frequency: 400 MHz

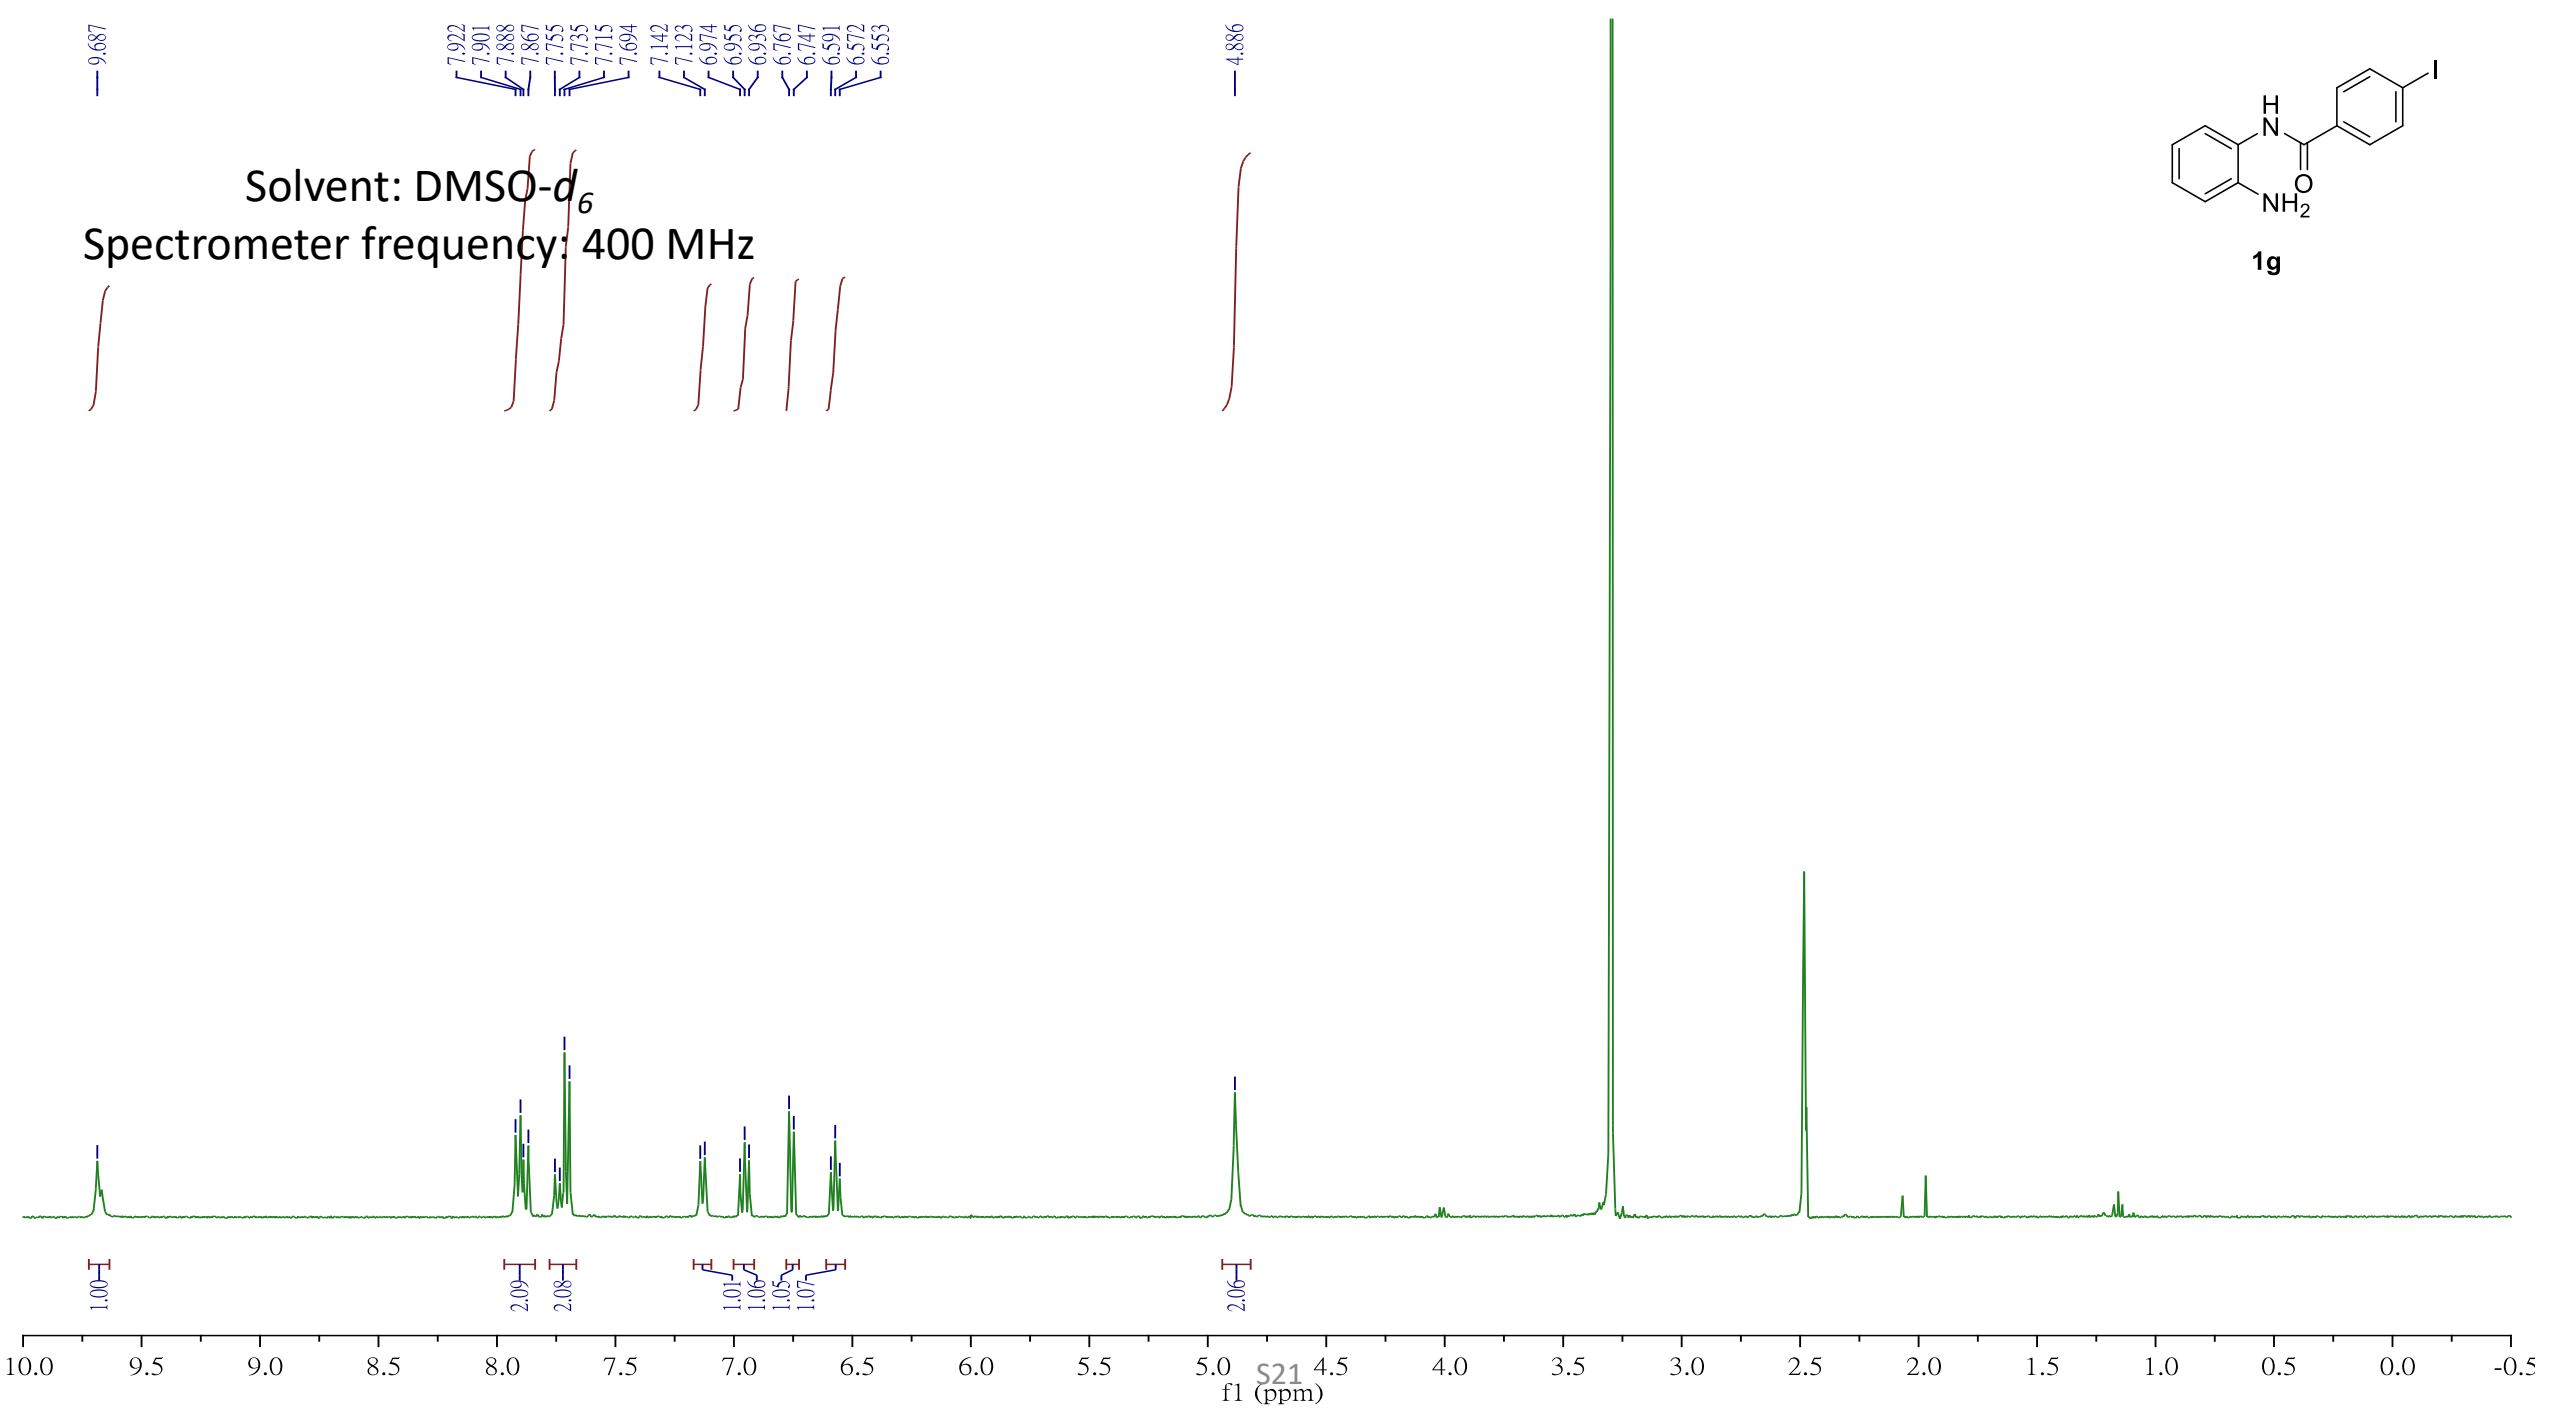

Solvent: DMSO- $d_6$   
Spectrometer frequency: 100 MHz

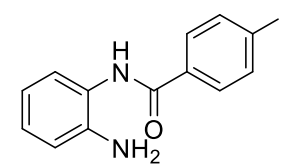

**1g**

164.869  
143.686  
137.562  
134.230  
131.693  
130.348  
127.246  
127.082  
123.394  
116.606  
116.477

200 190 180 170 160 150 140 130 120 110 100 90 80 70 60 50 40 30 20 10 0

f1 (ppm)

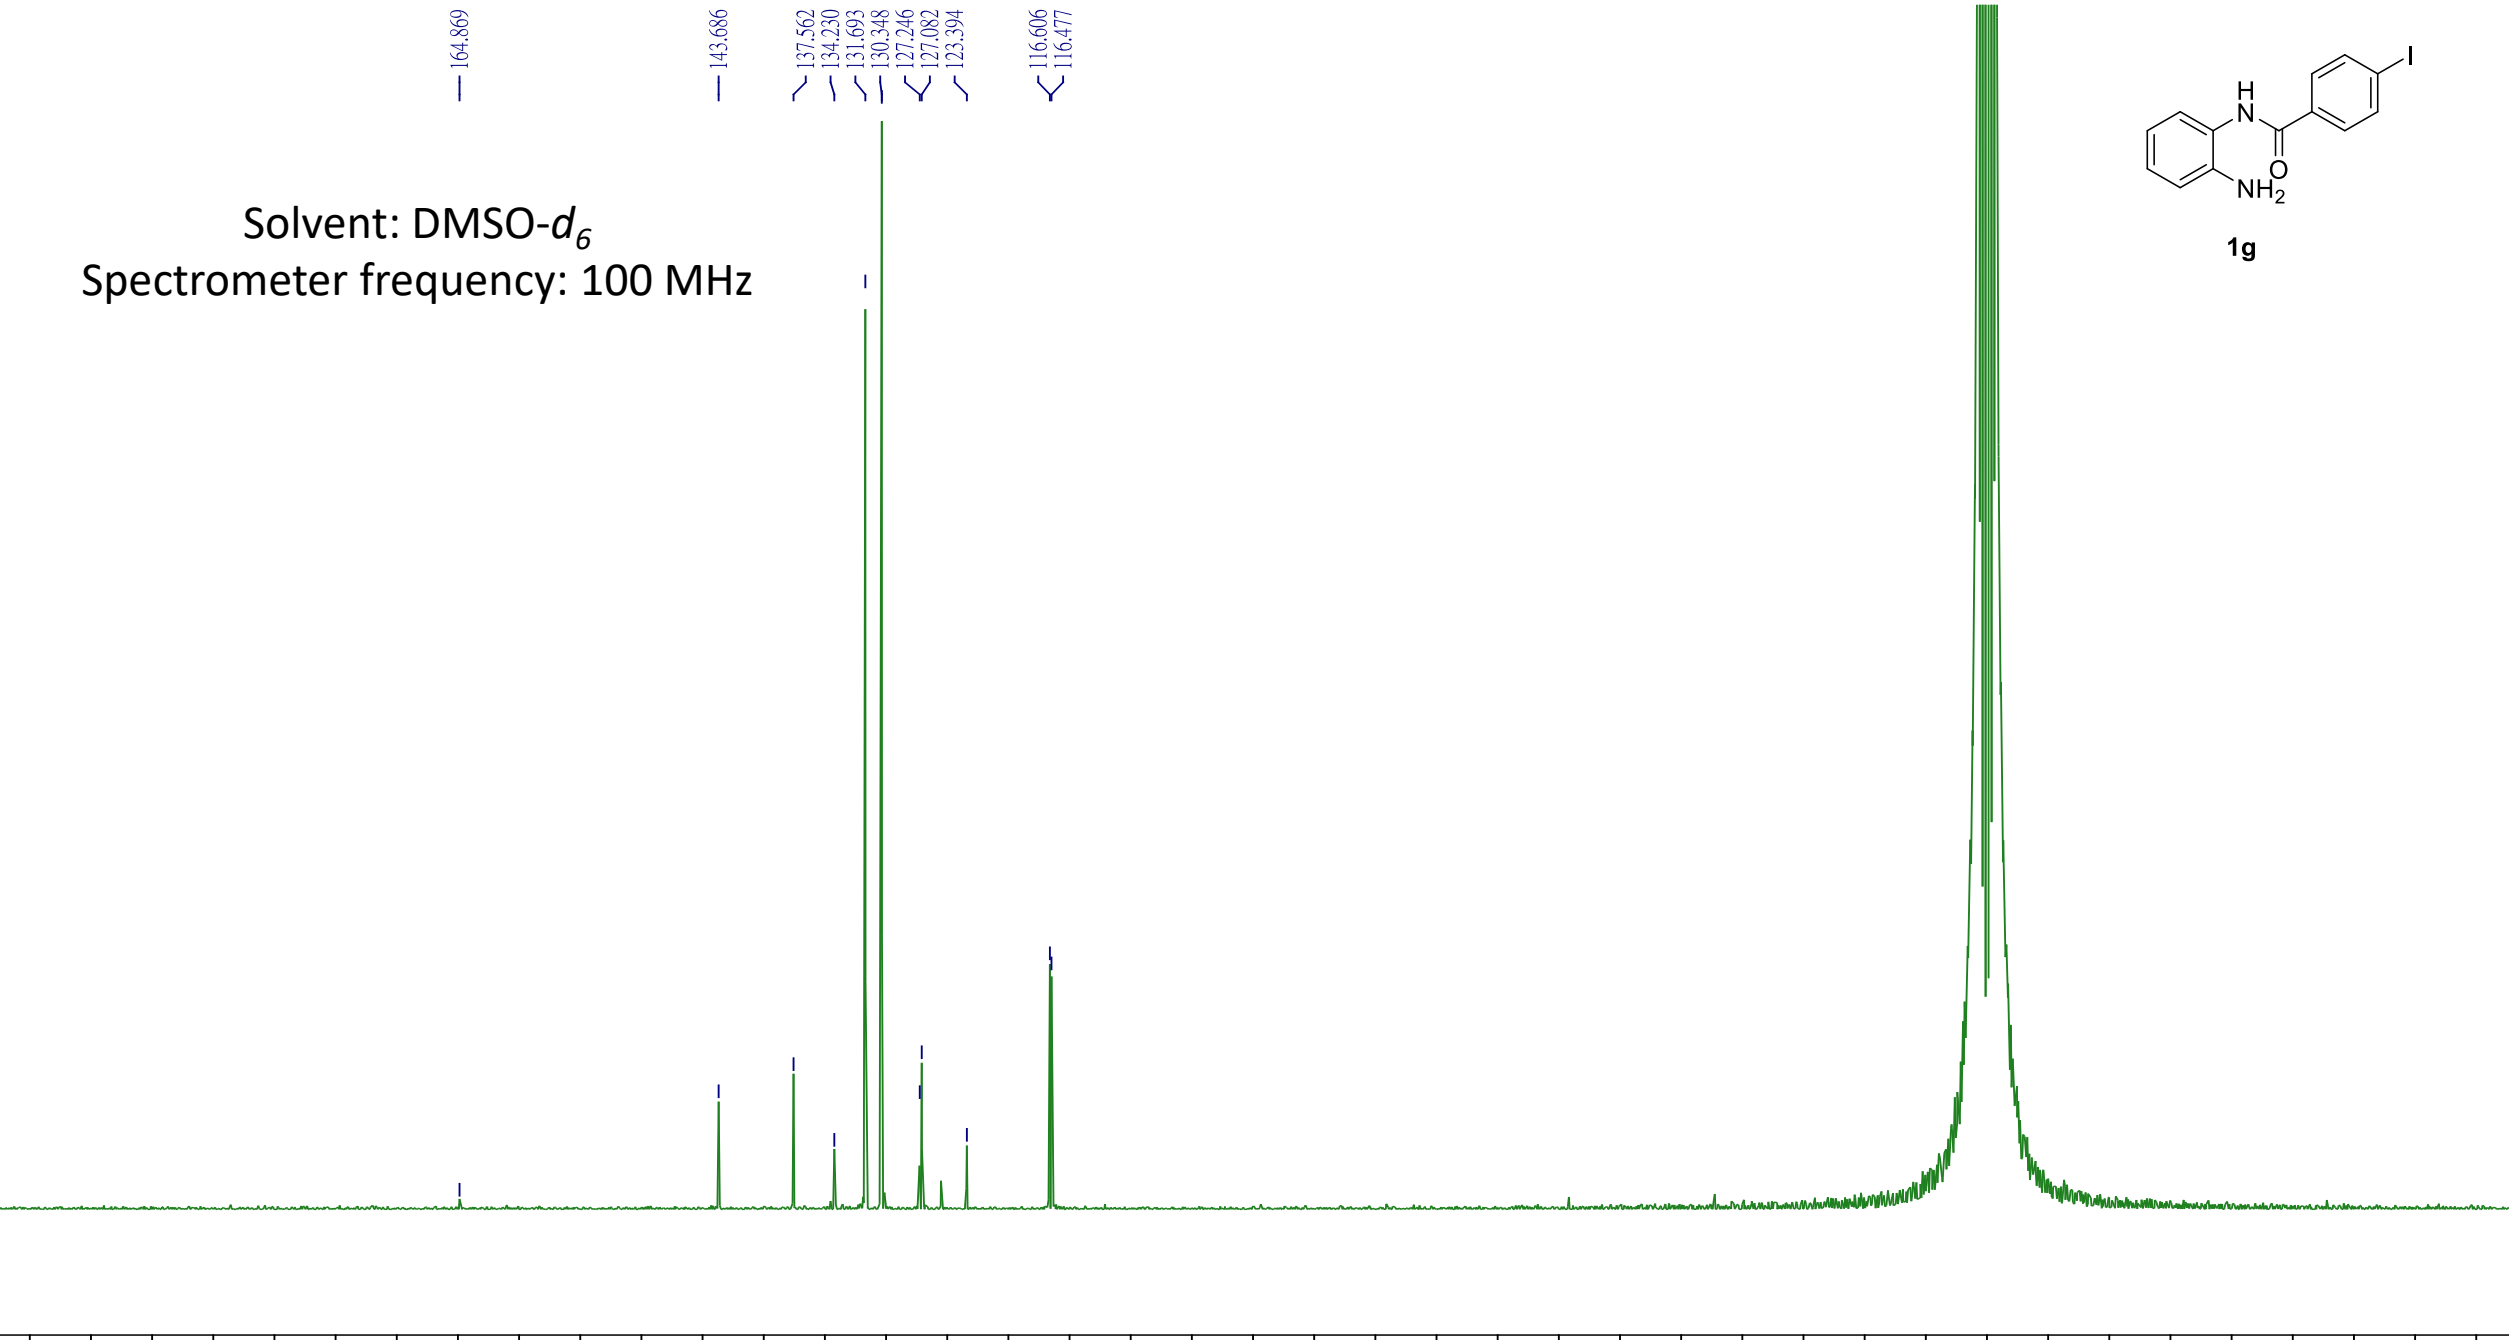

9.819

8.103  
8.082  
8.065  
8.044

7.166  
7.147  
6.988  
6.968  
6.946  
6.781  
6.758  
6.603  
6.584  
6.563

4.919

3.881

Solvent: DMSO-*d*<sub>6</sub>  
Spectrometer frequency: 400 MHz

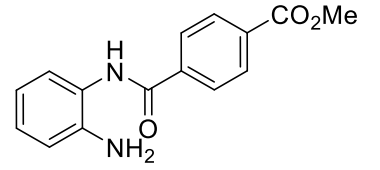

**1j**

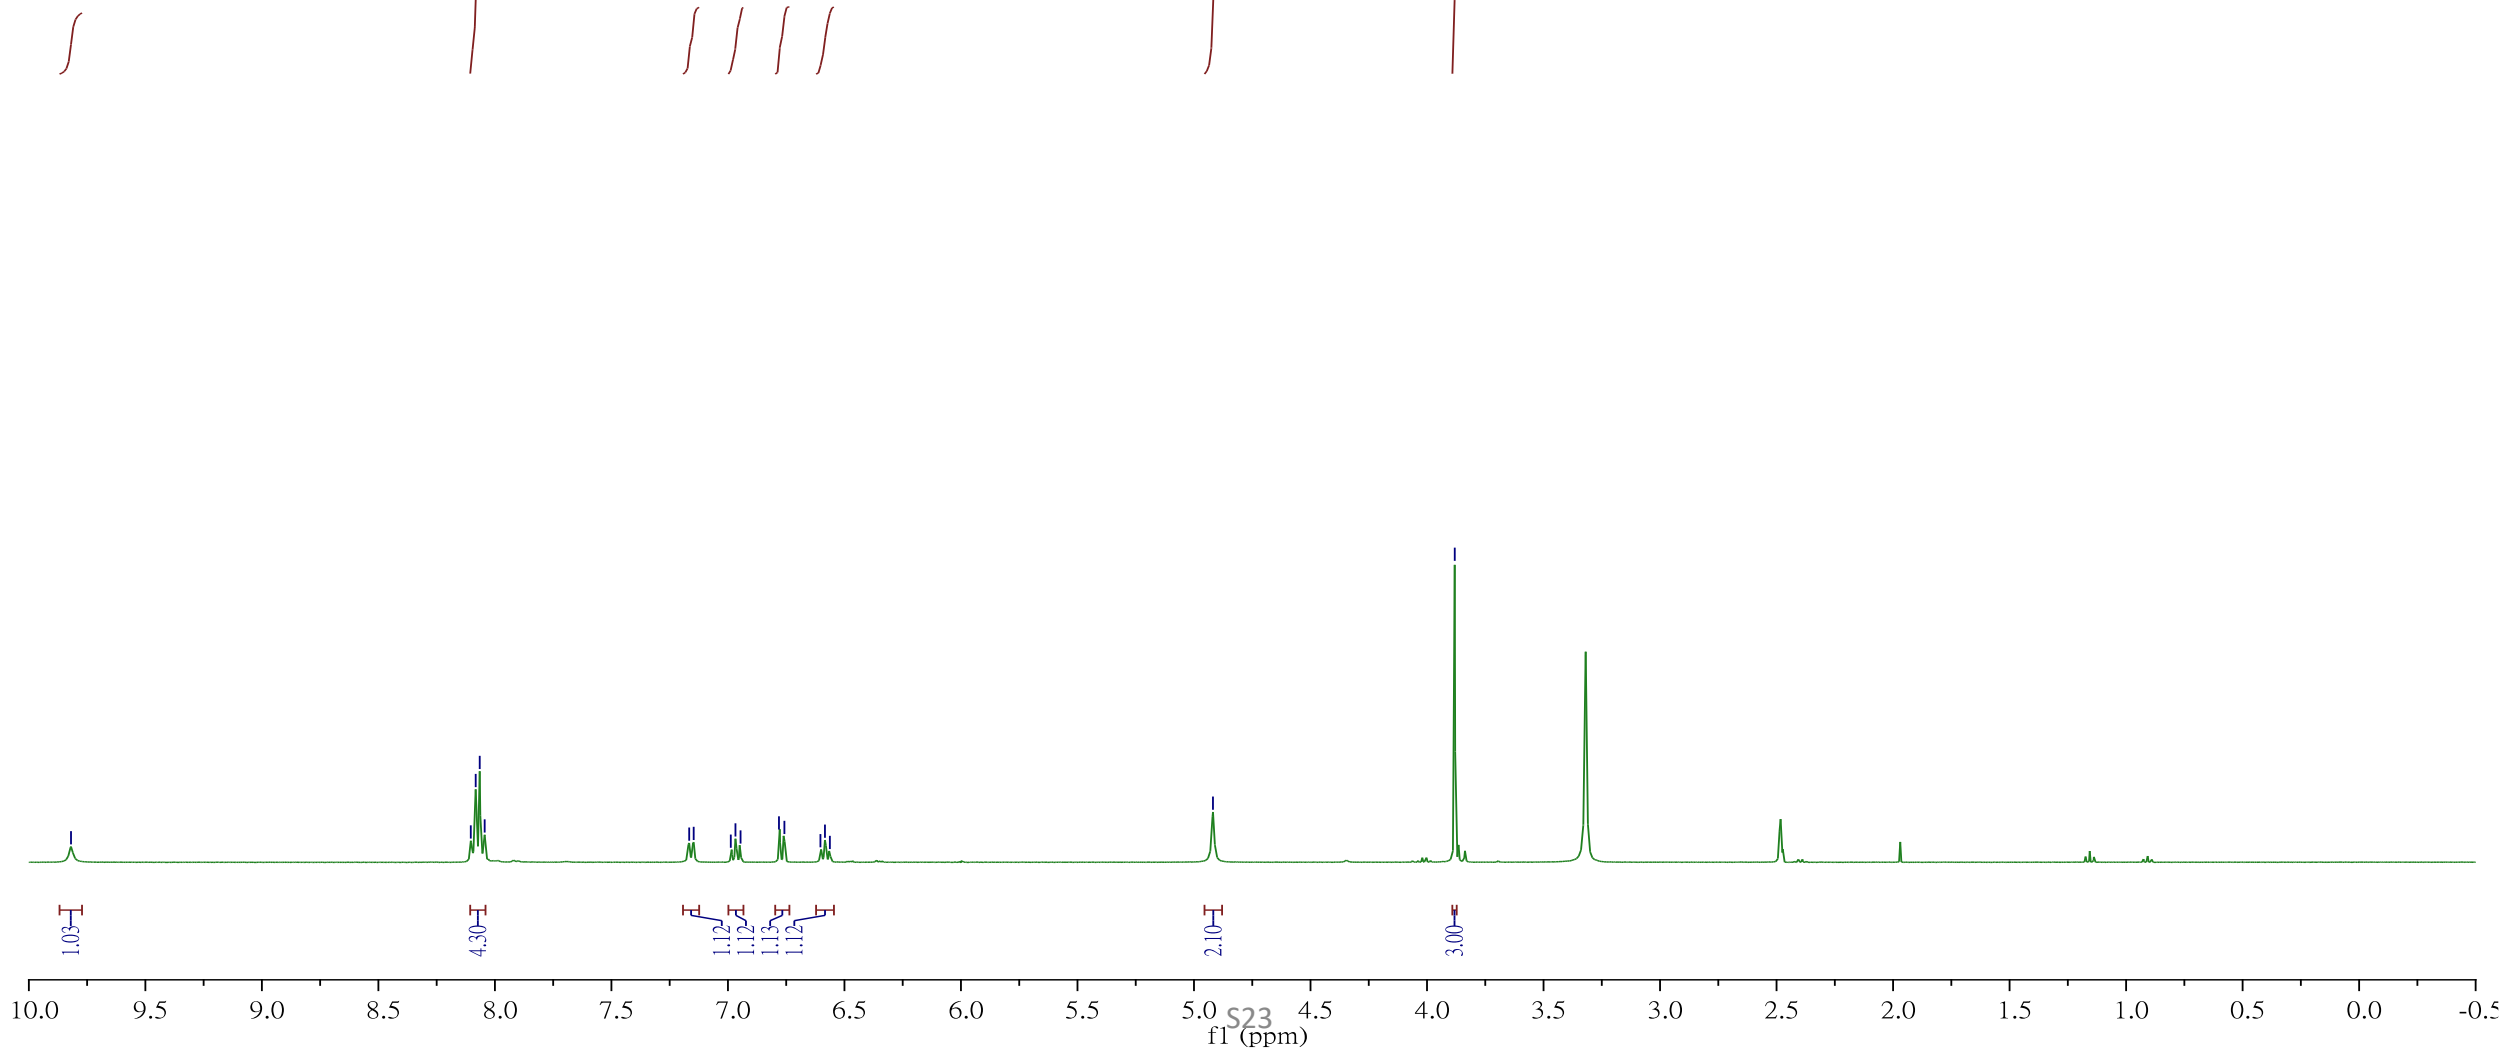

Solvent: DMSO- $d_6$   
Spectrometer frequency: 100 MHz

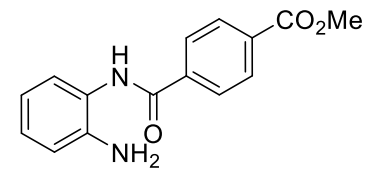

**1j**

166.189  
164.995  
143.693  
139.276  
132.289  
129.584  
129.489  
128.625  
127.228  
127.152  
123.315  
116.606  
116.499

52.837

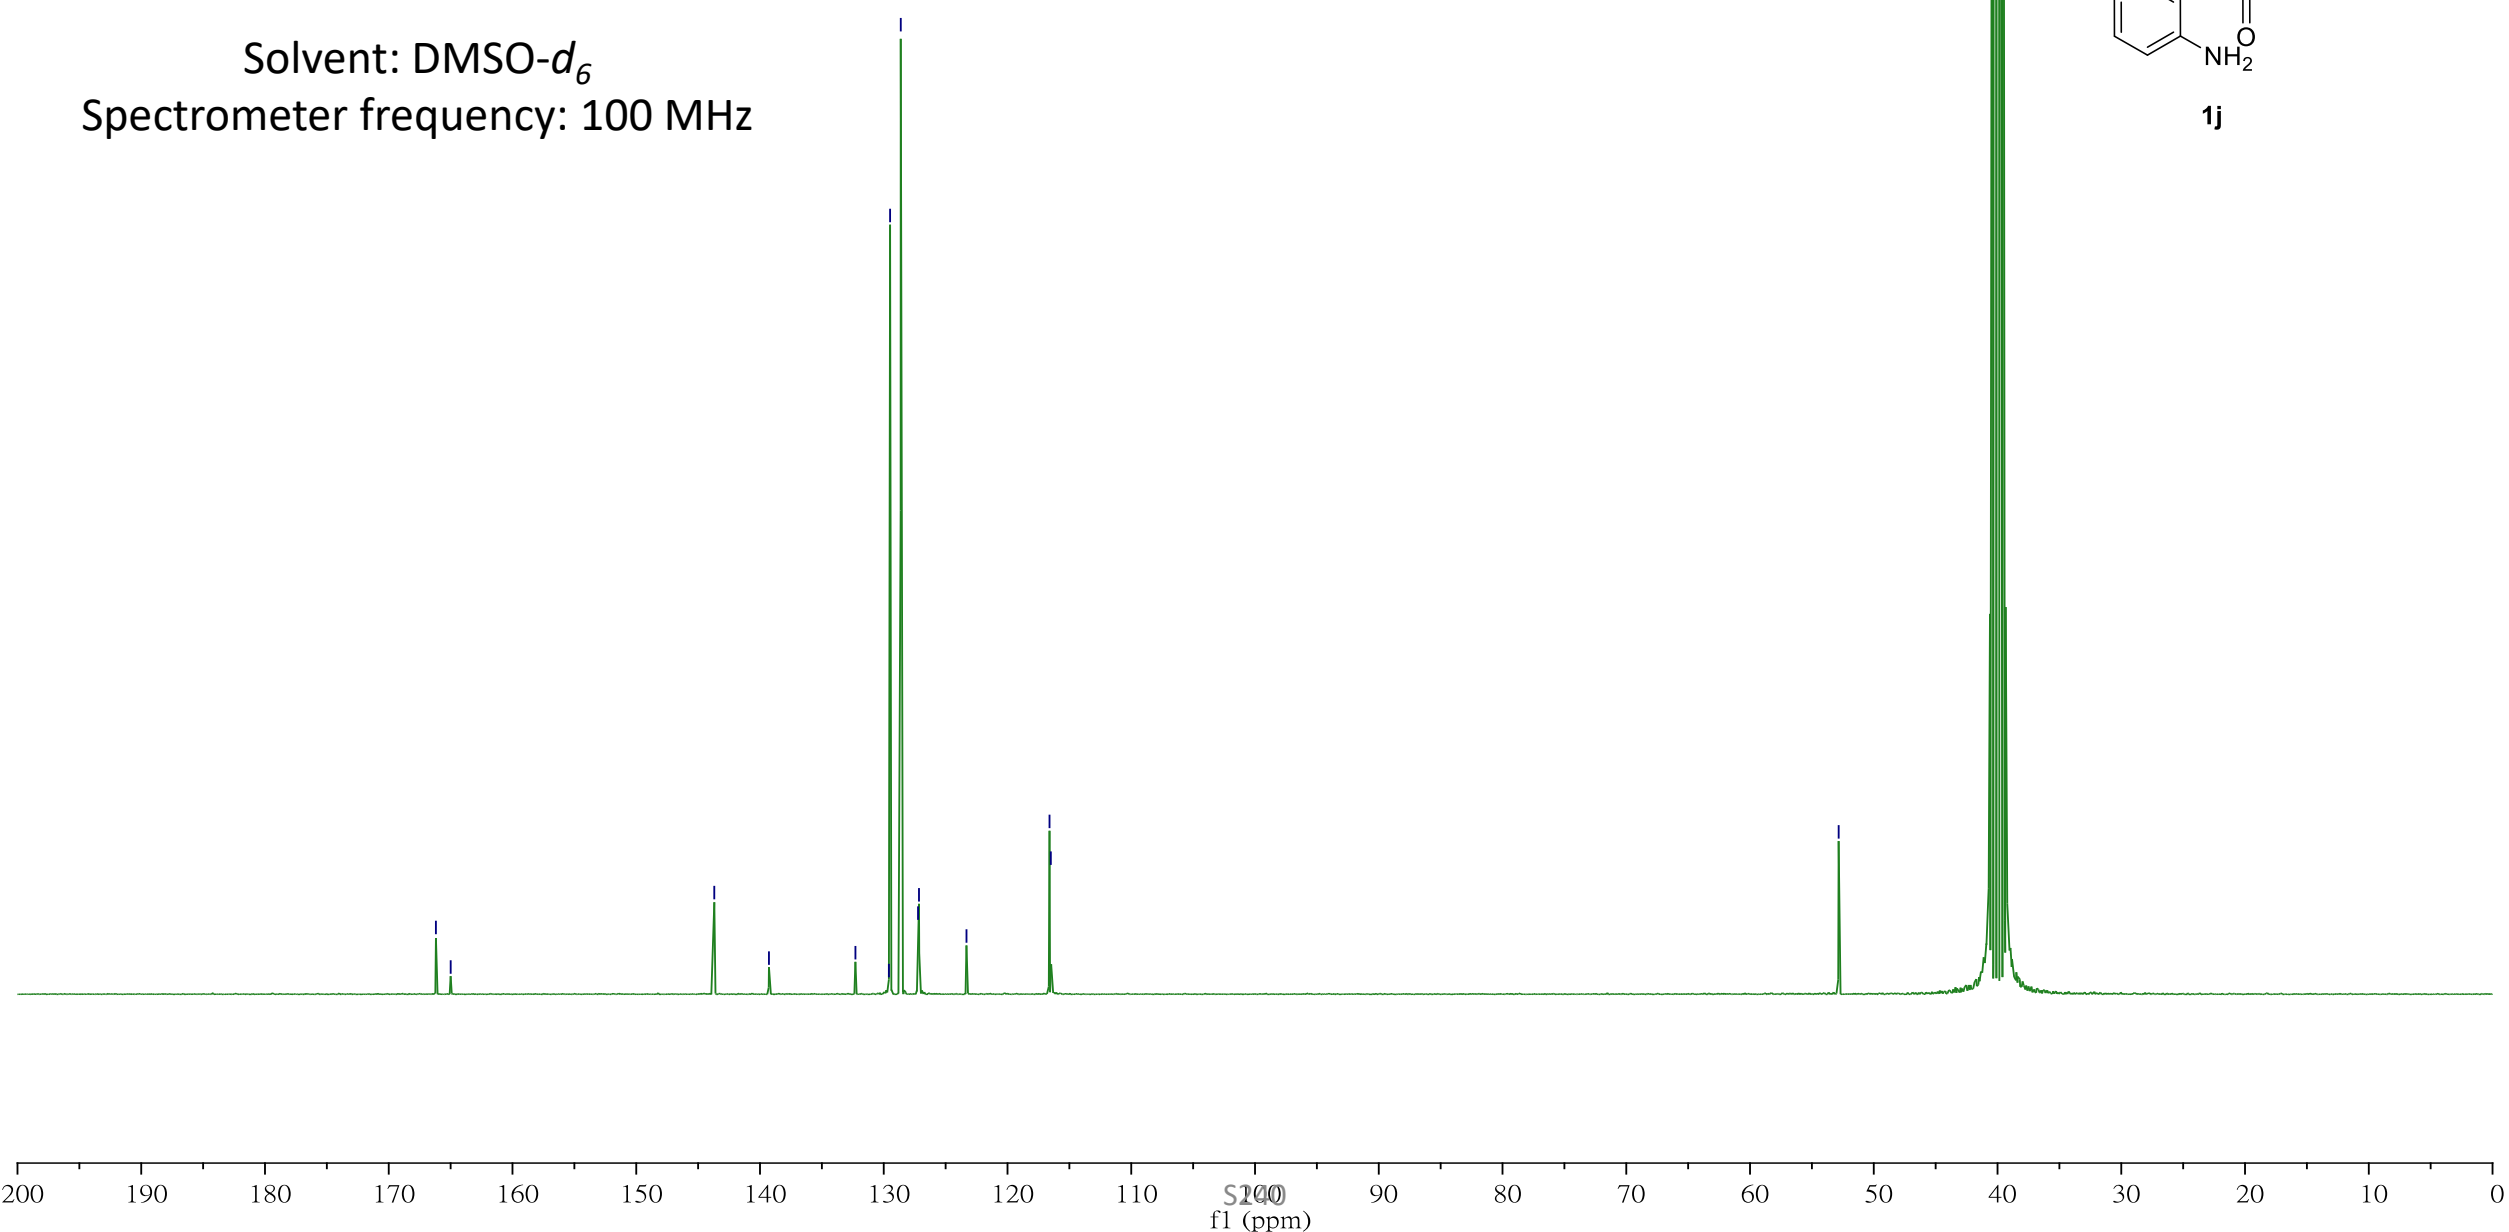



Solvent: DMSO- $d_6$   
Spectrometer frequency: 400 MHz

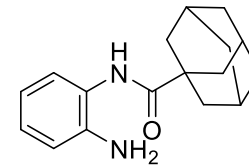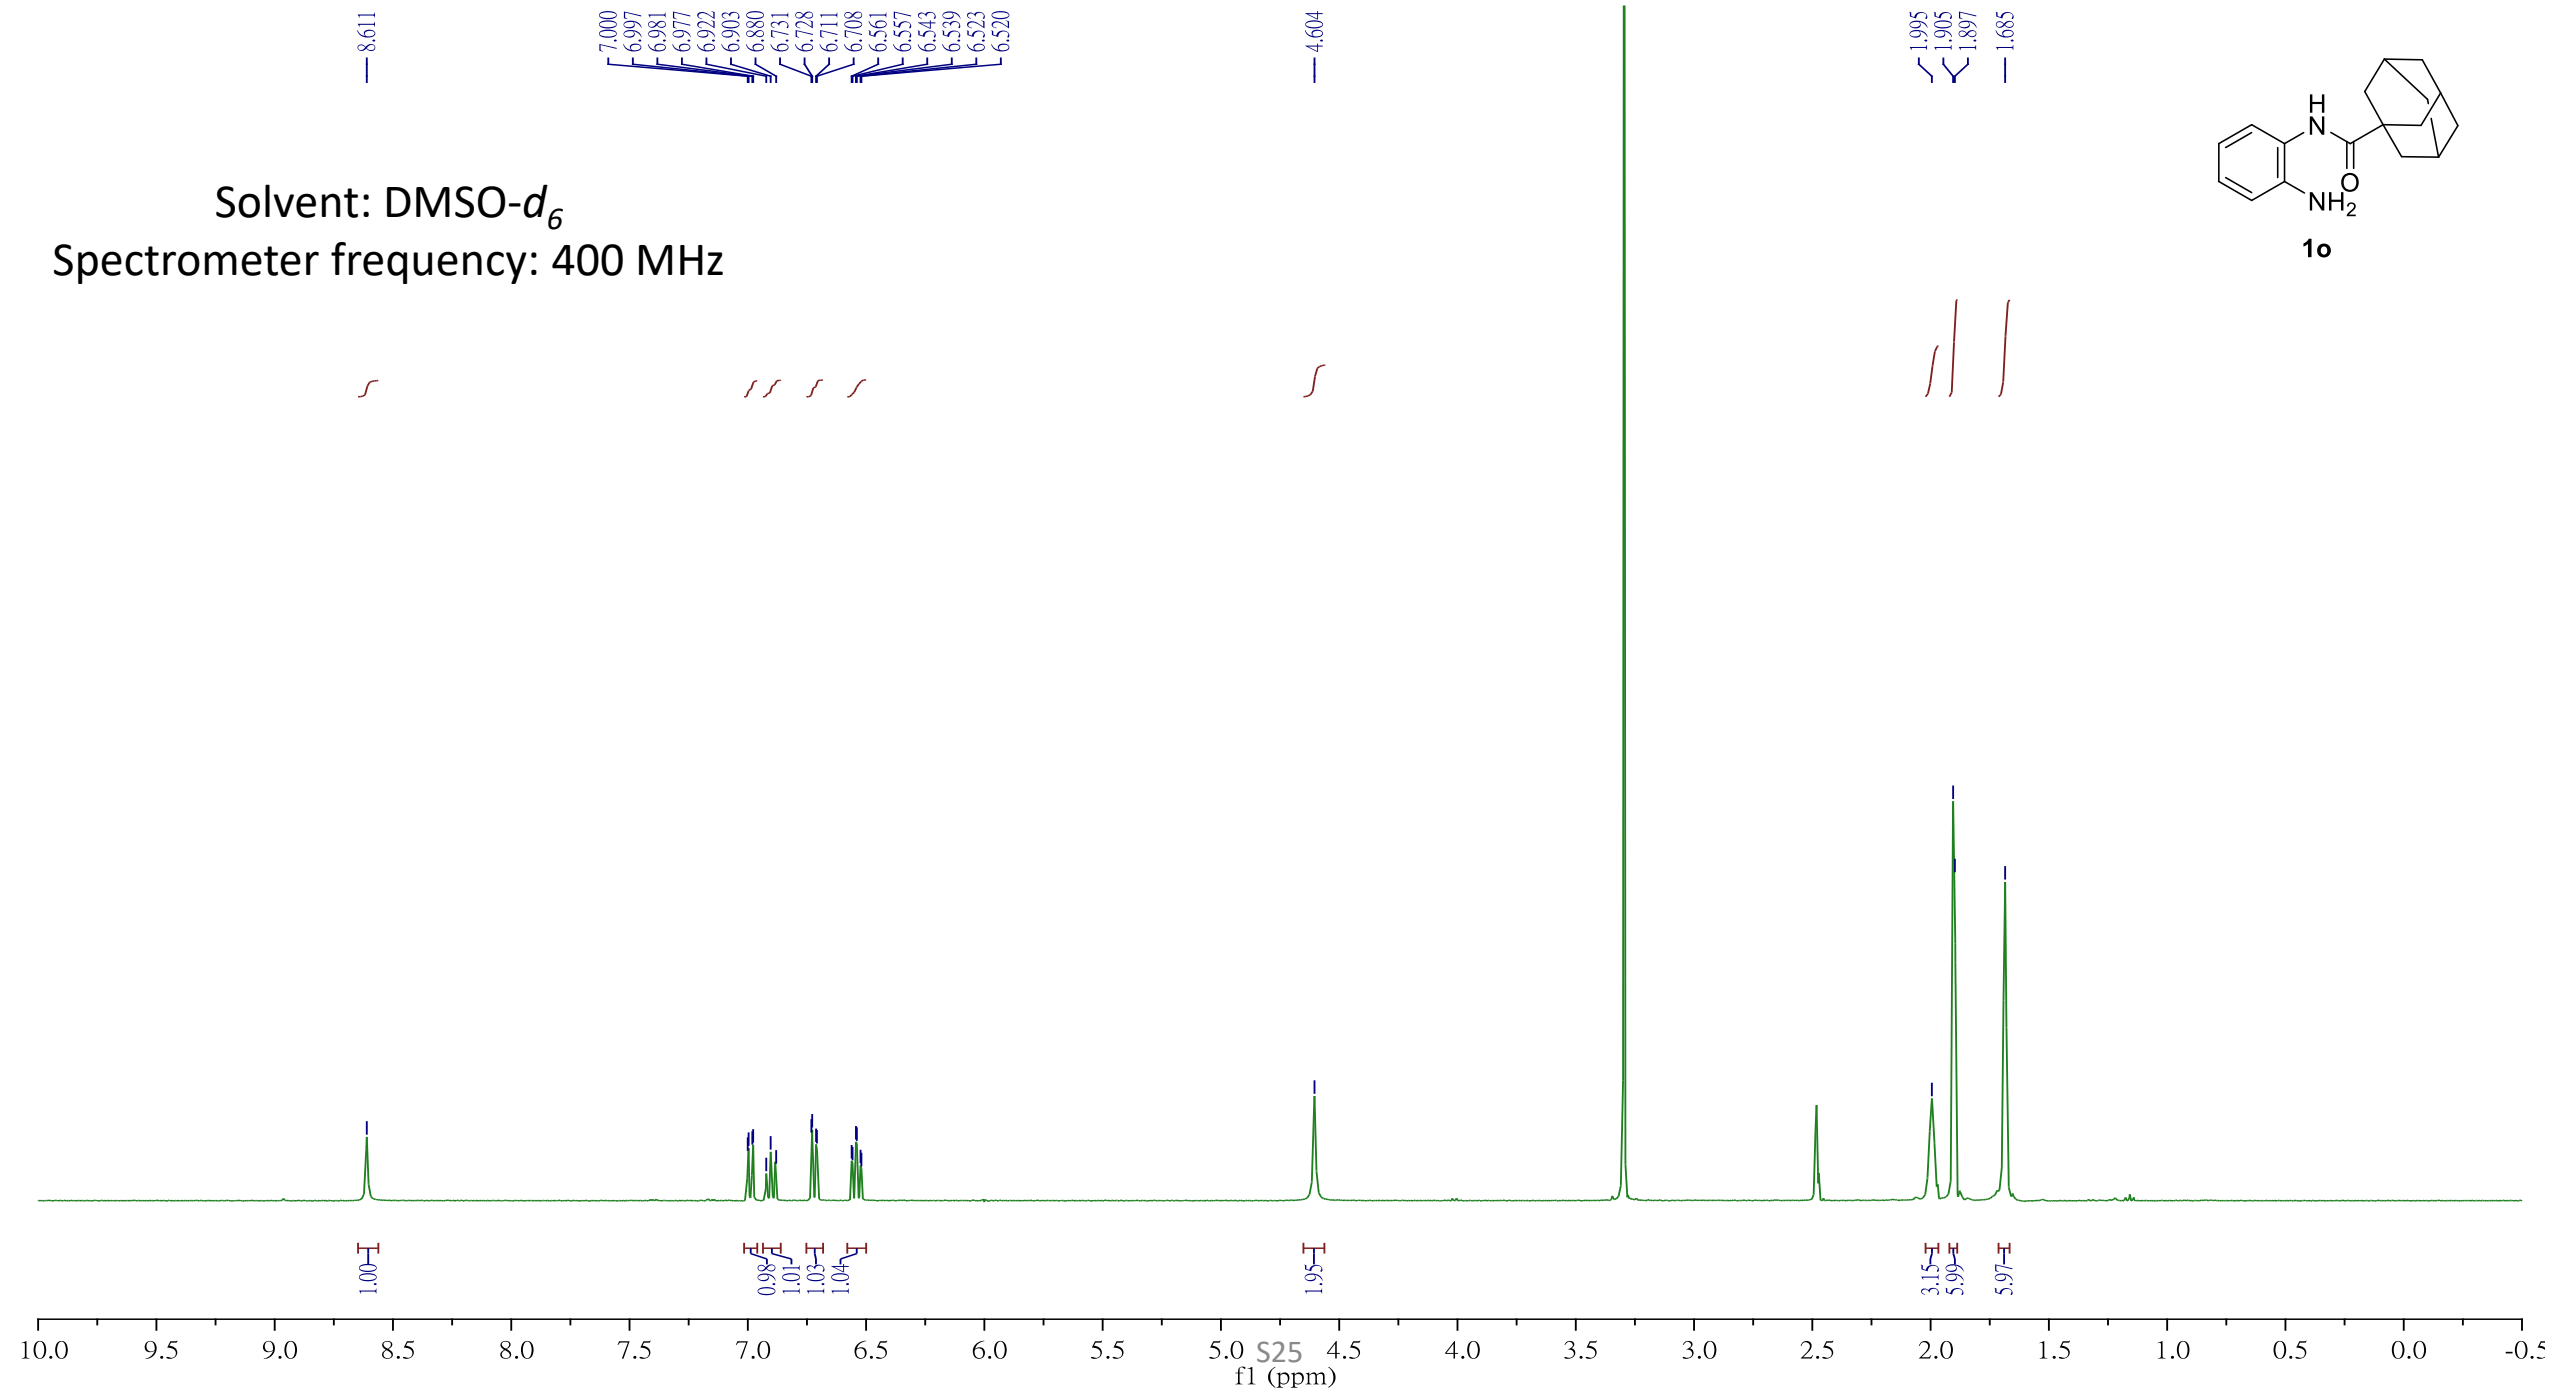

Solvent: DMSO-*d*<sub>6</sub>  
Spectrometer frequency: 100 MHz

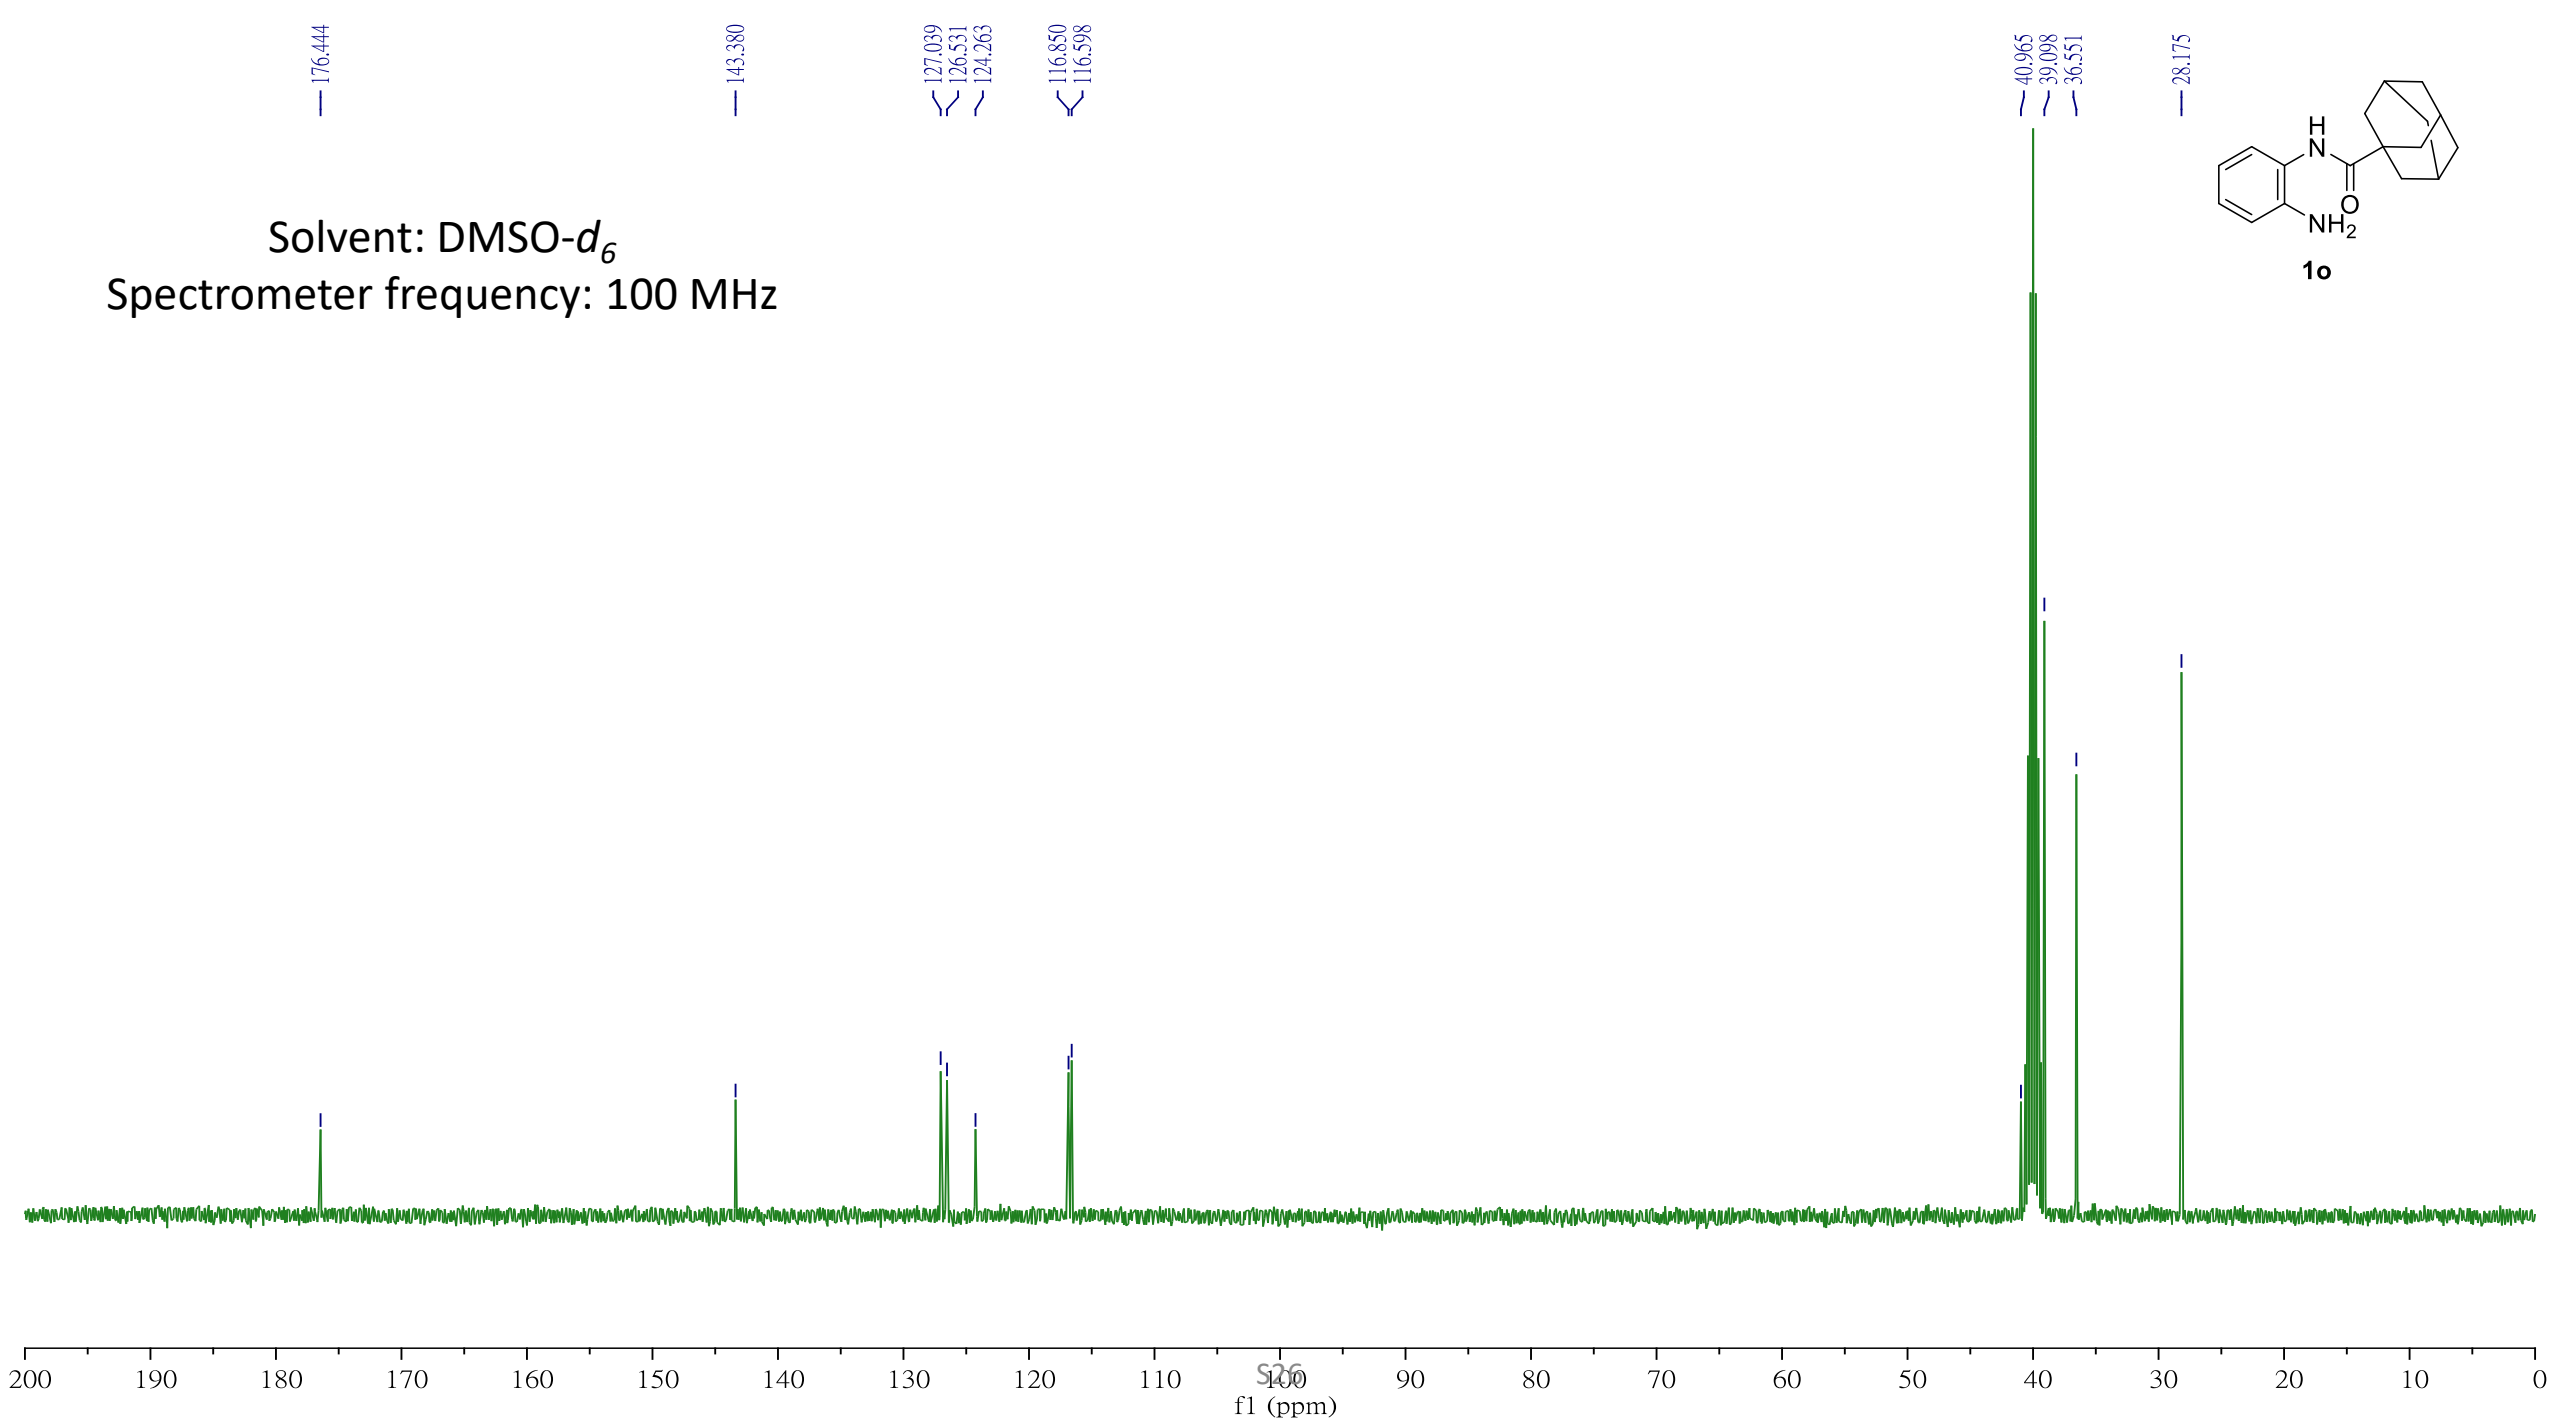

Solvent: DMSO- $d_6$   
Spectrometer frequency: 400 MHz

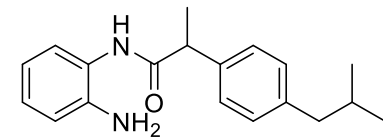

1p

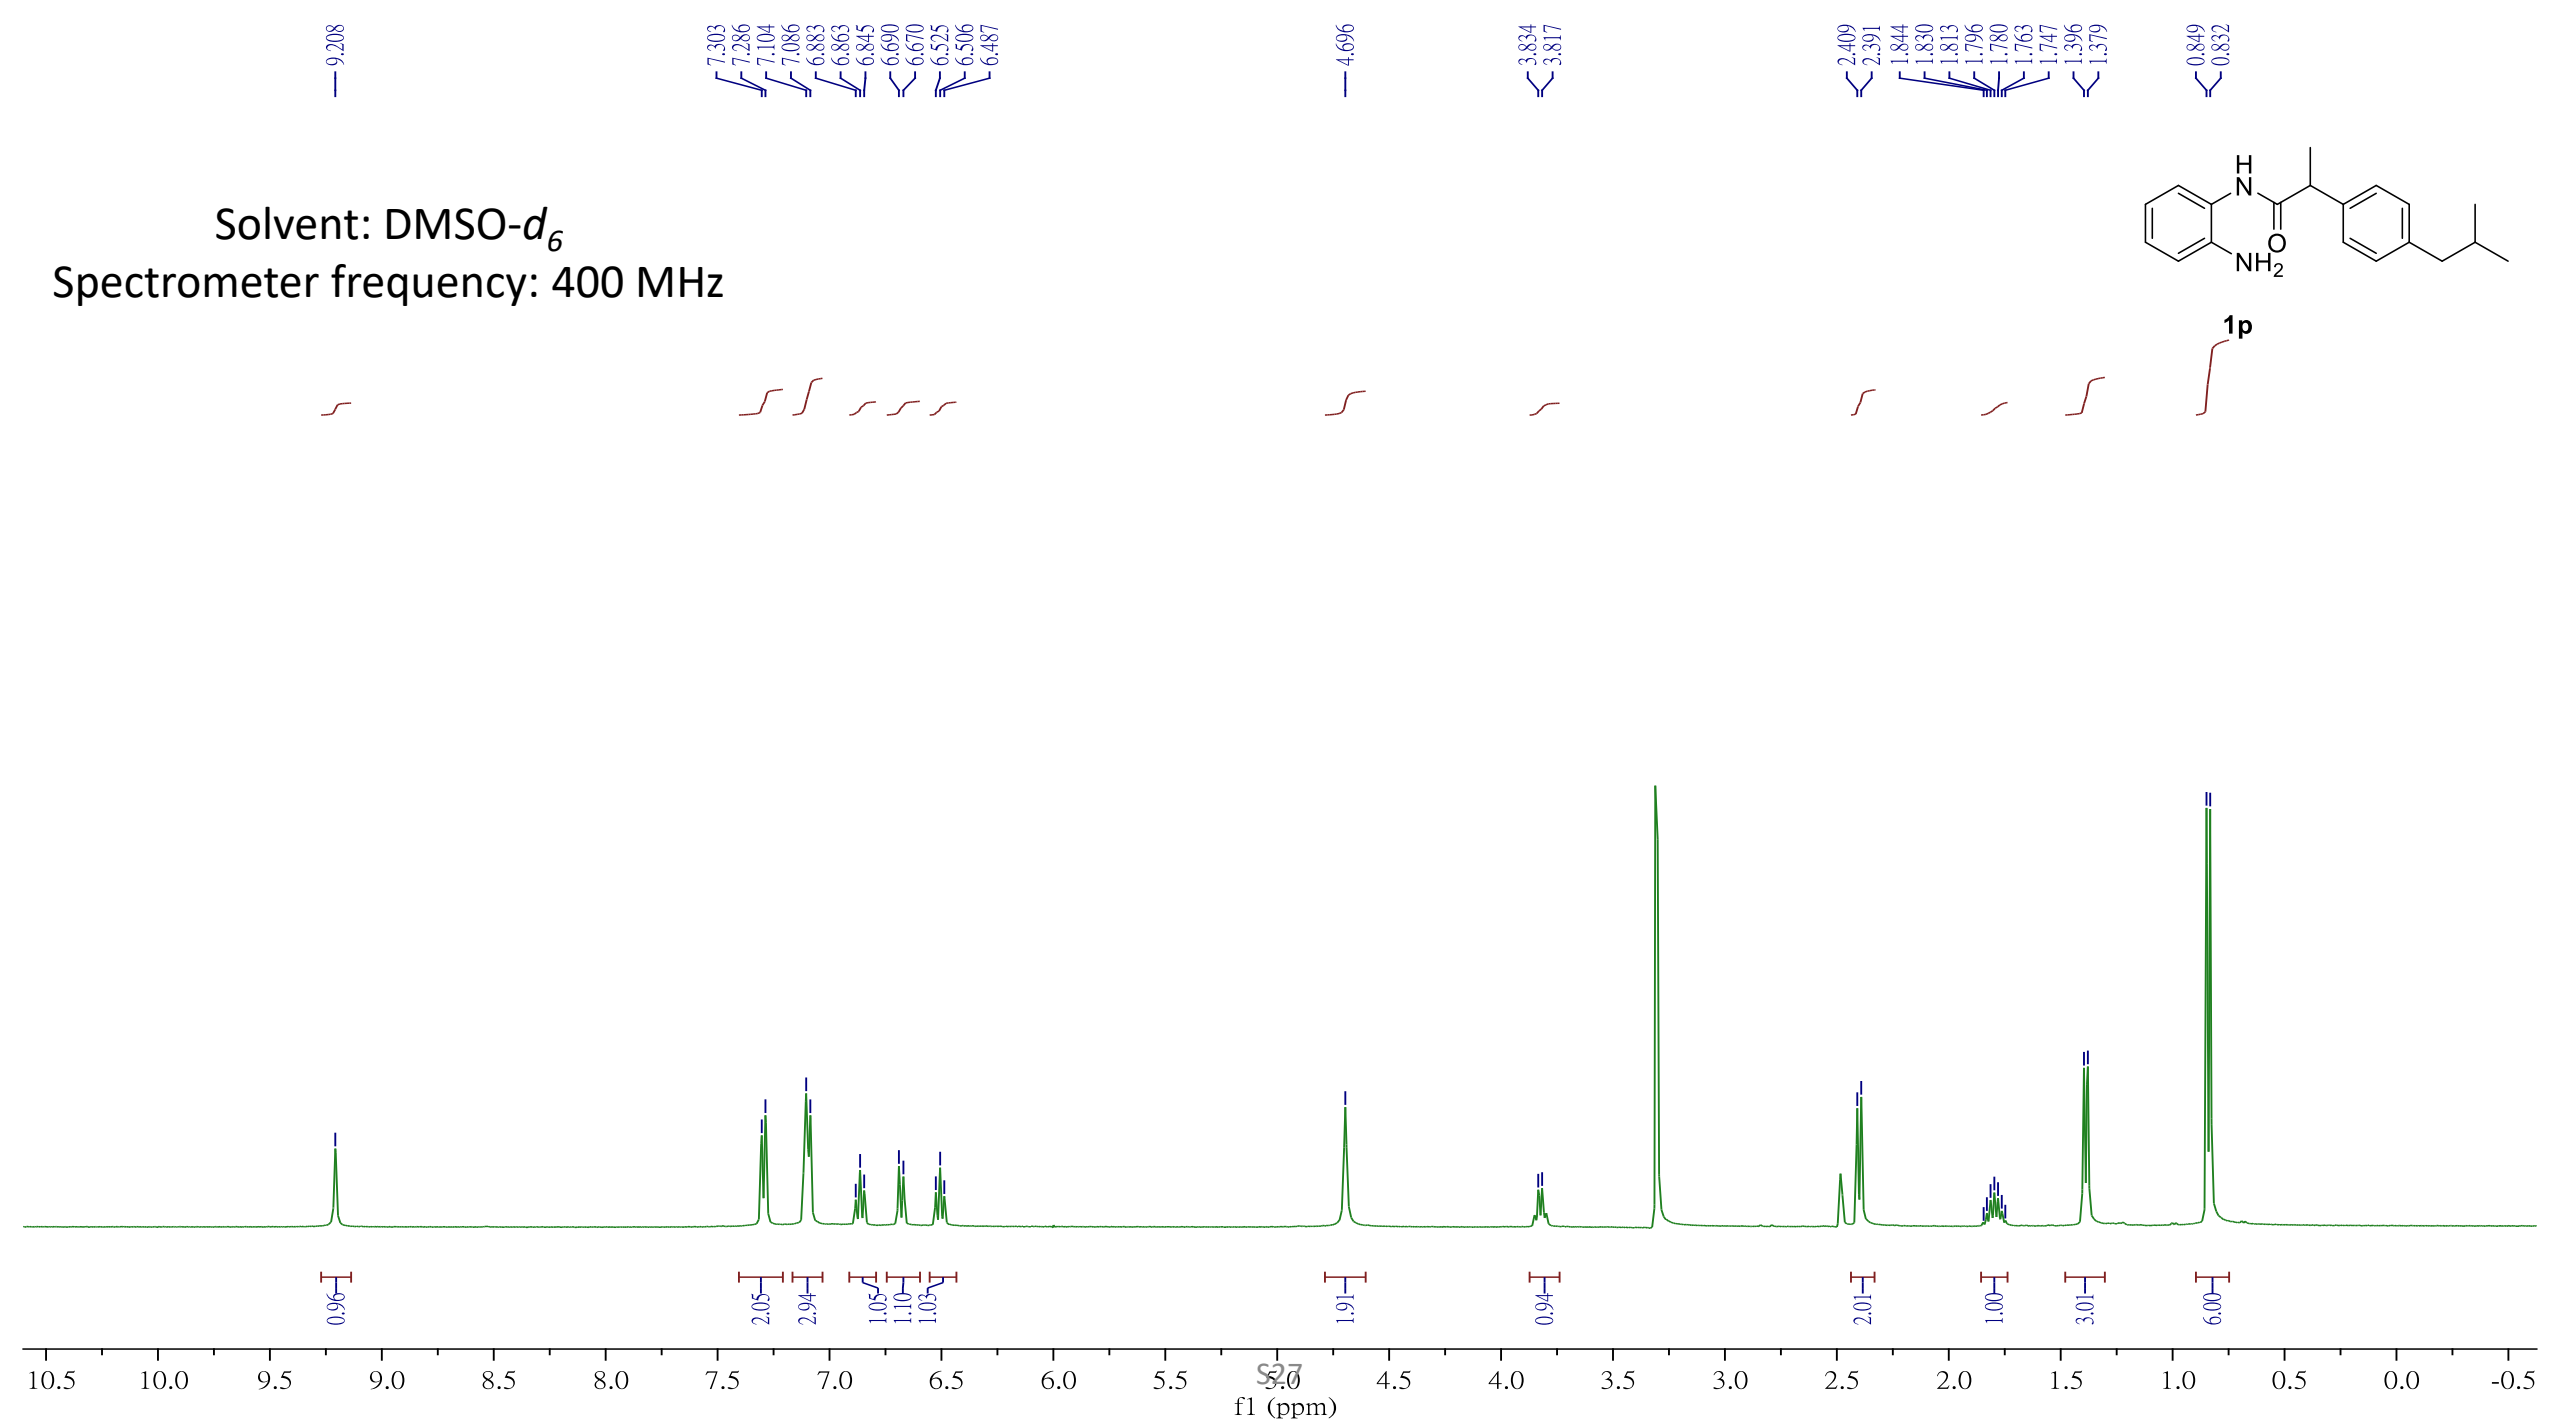

Solvent: DMSO- $d_6$   
Spectrometer frequency: 100 MHz

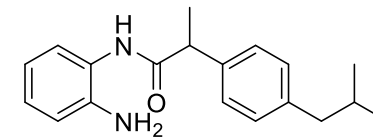

1p

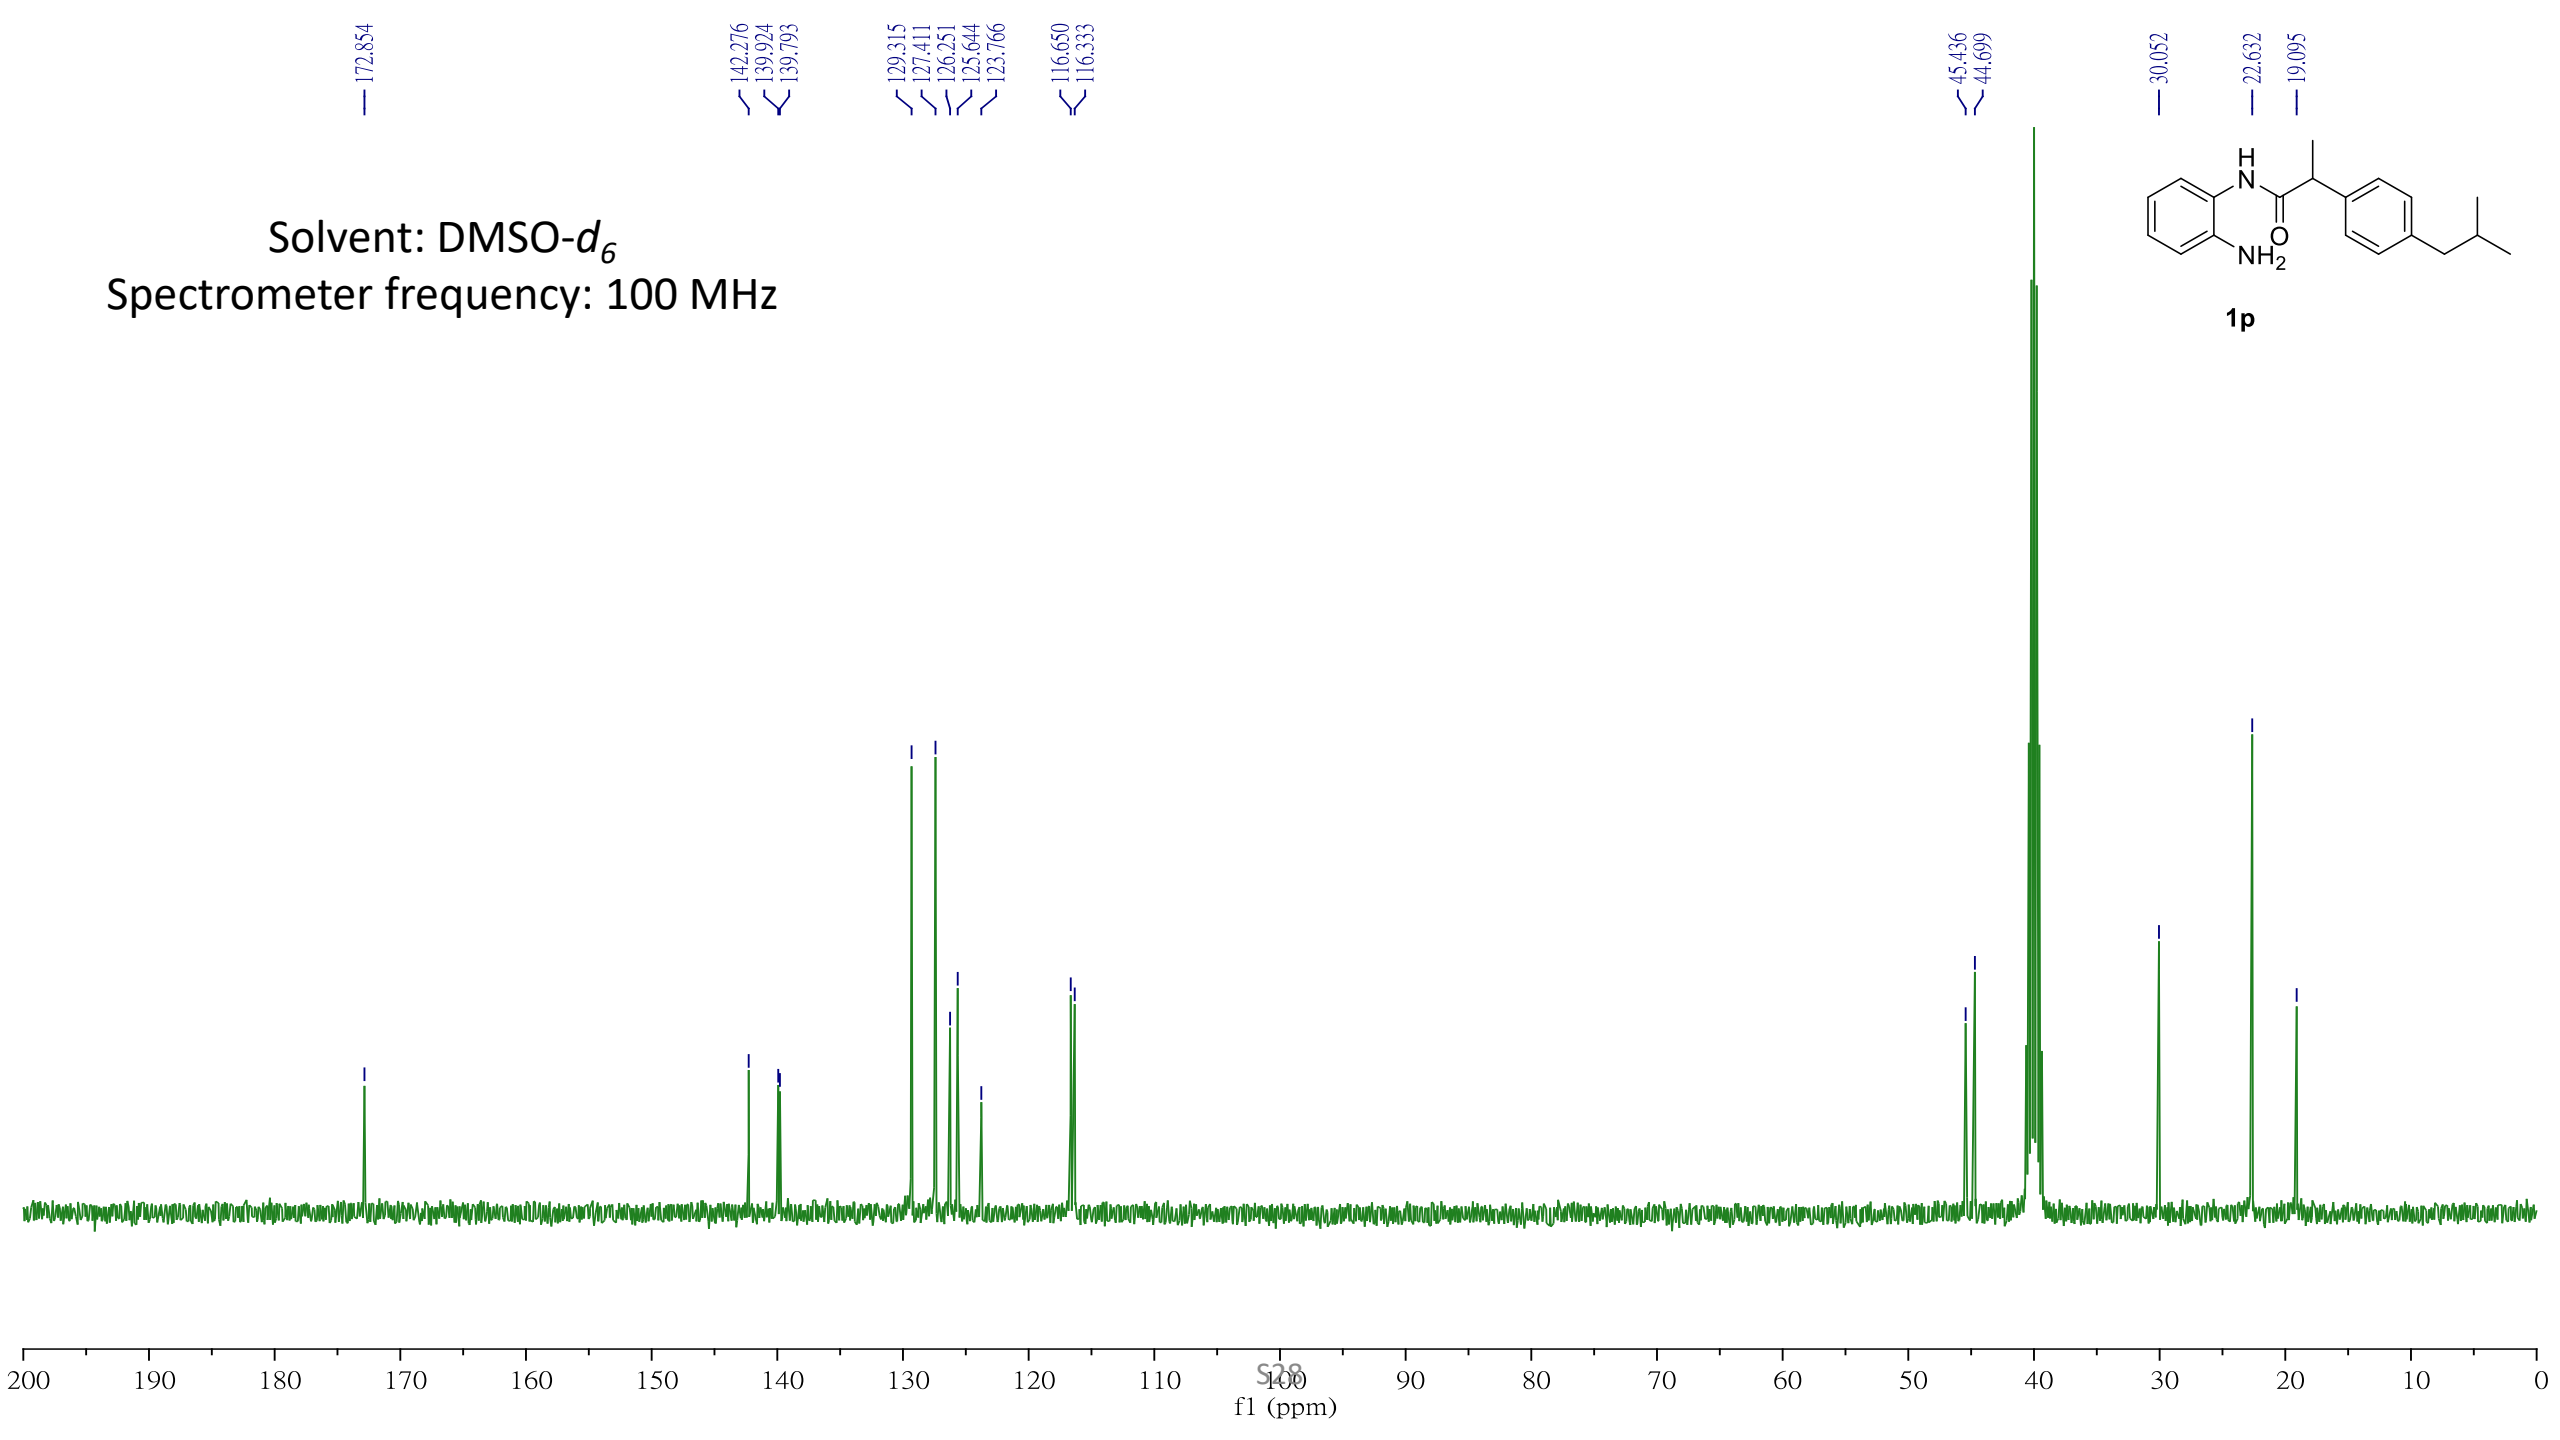

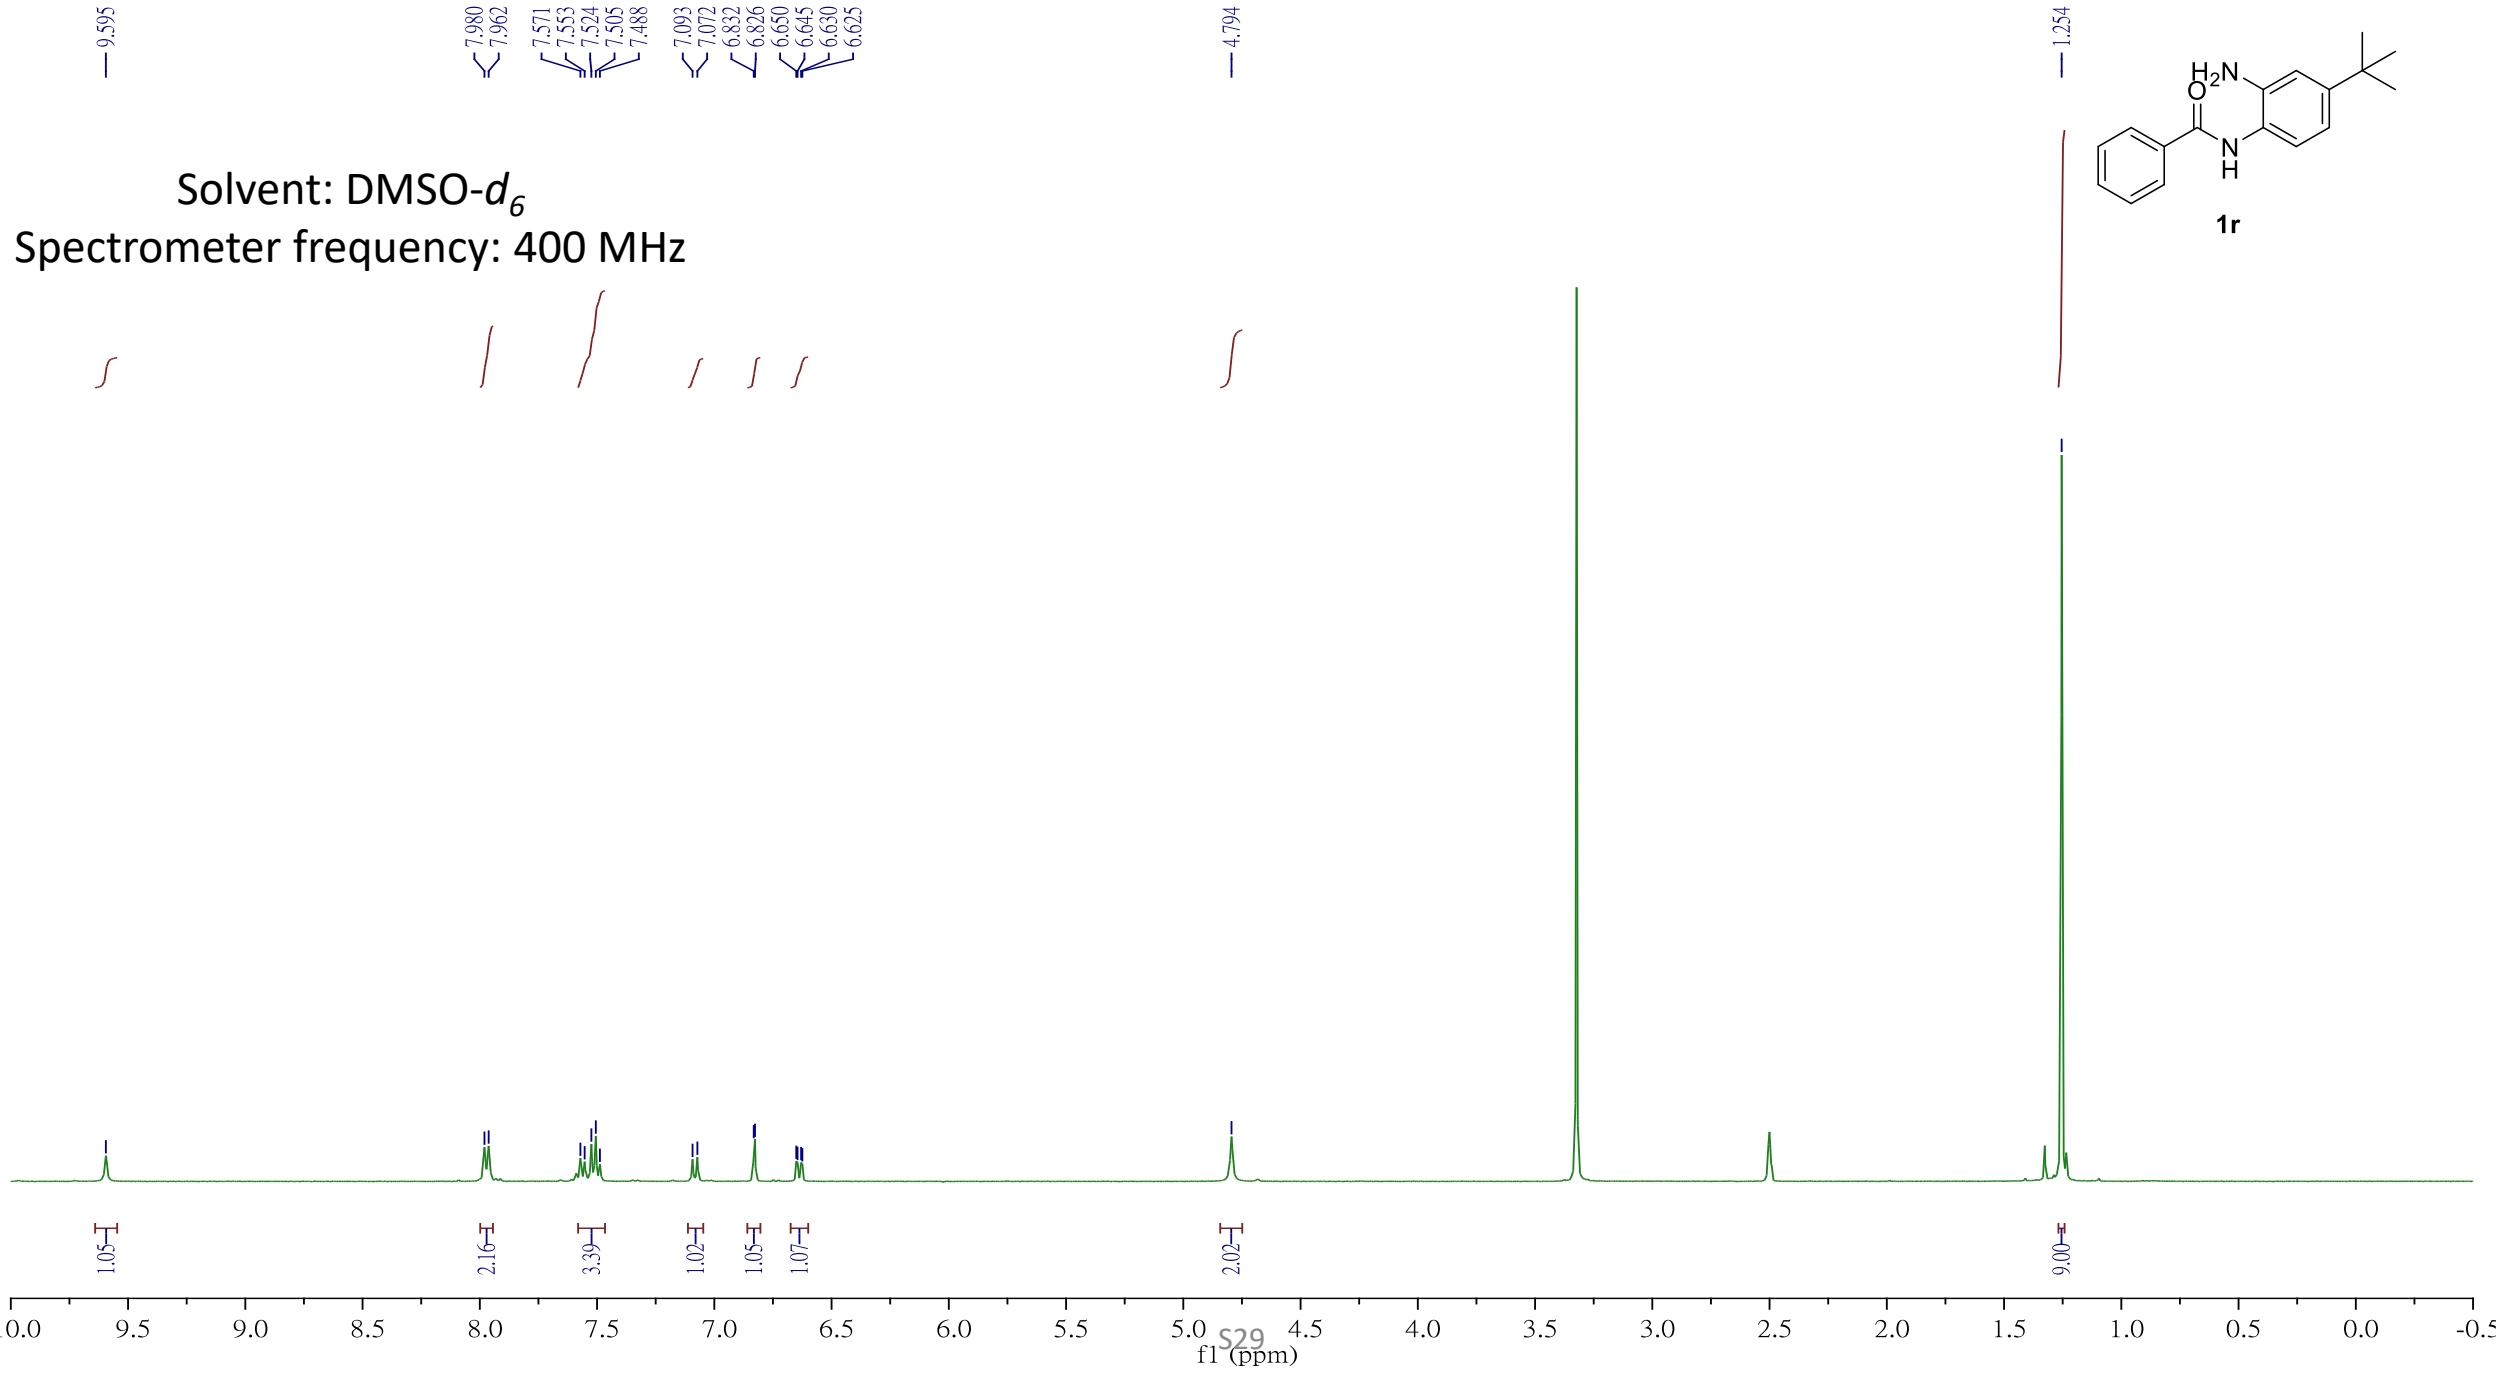

Solvent: DMSO- $d_6$   
Spectrometer frequency: 100 MHz

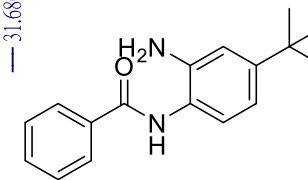

165.746  
149.350  
142.902  
135.138  
131.746  
128.691  
128.156  
126.594  
121.393  
113.899  
113.614

34.464  
31.680

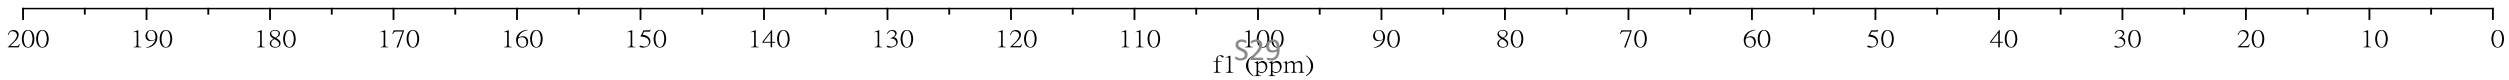

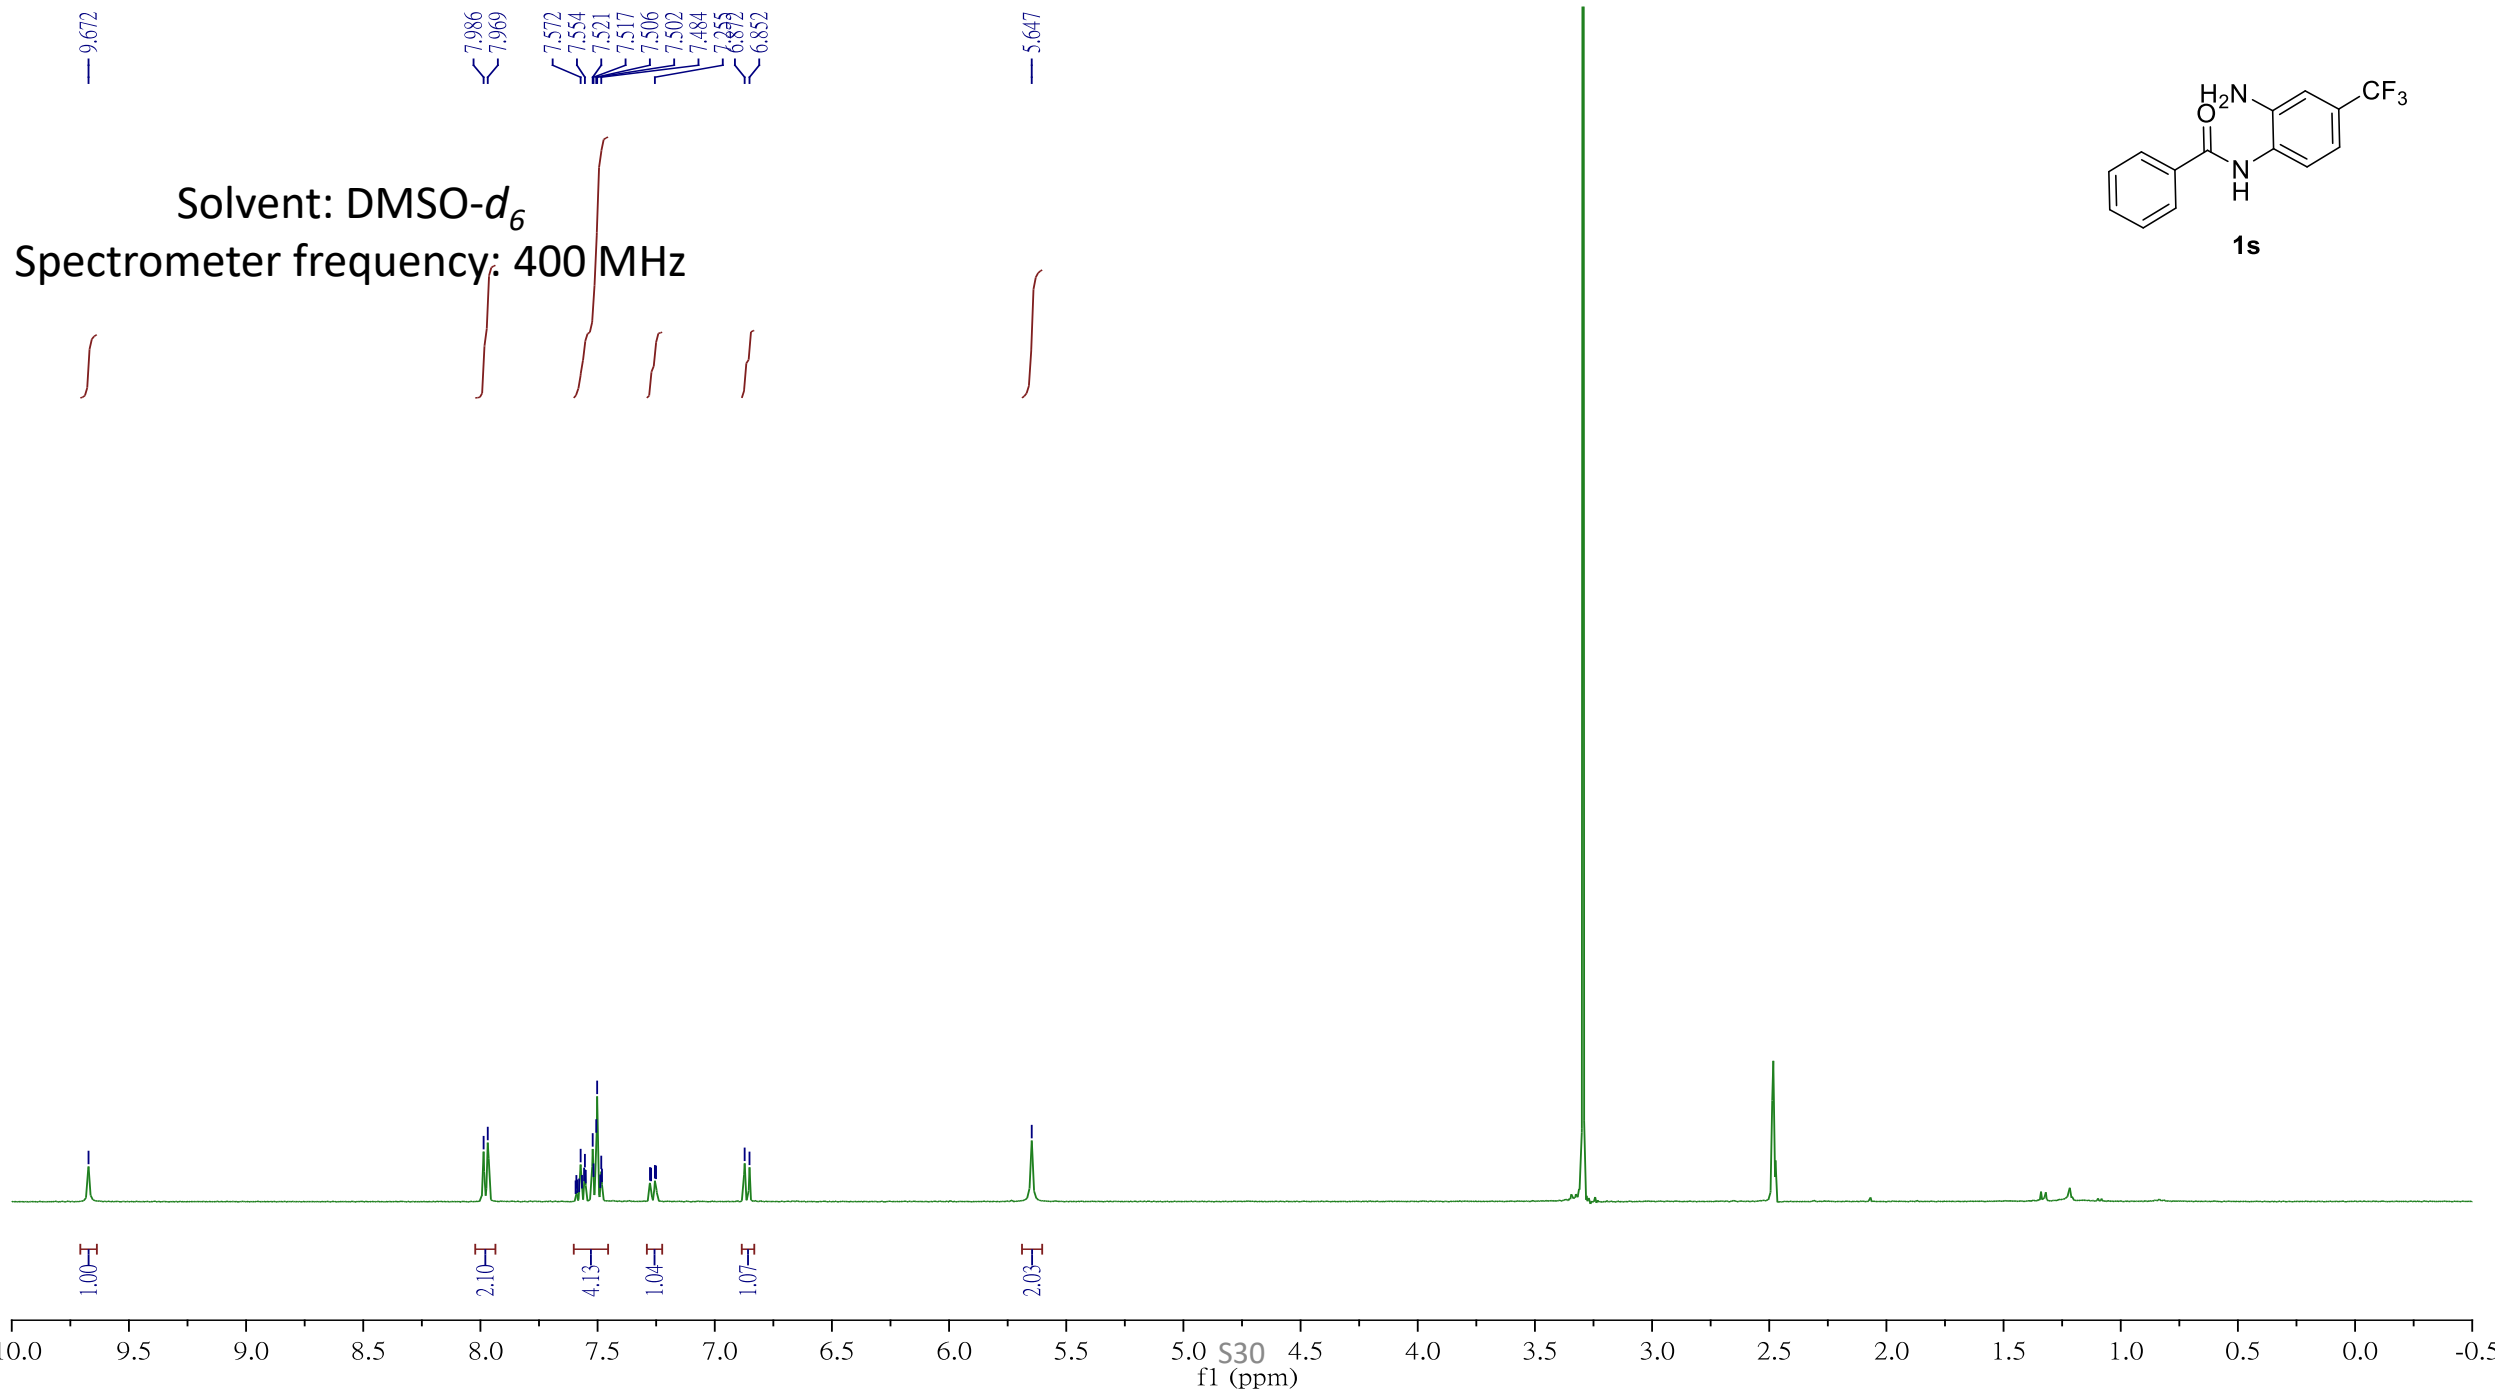

M0690-14  
di-cf3-sm

166.24  
147.26  
134.81  
131.98  
128.69  
128.31  
126.79  
124.35  
124.31  
124.27  
124.11  
123.98  
123.94  
123.91  
122.74  
116.15  
115.81  
115.68

Solvent: DMSO-*d*<sub>6</sub>  
Spectrometer frequency: 100 MHz

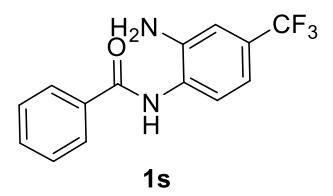

200 190 180 170 160 150 140 130 120 110 100 90 80 70 60 50 40 30 20 10 0  
f1 (ppm)

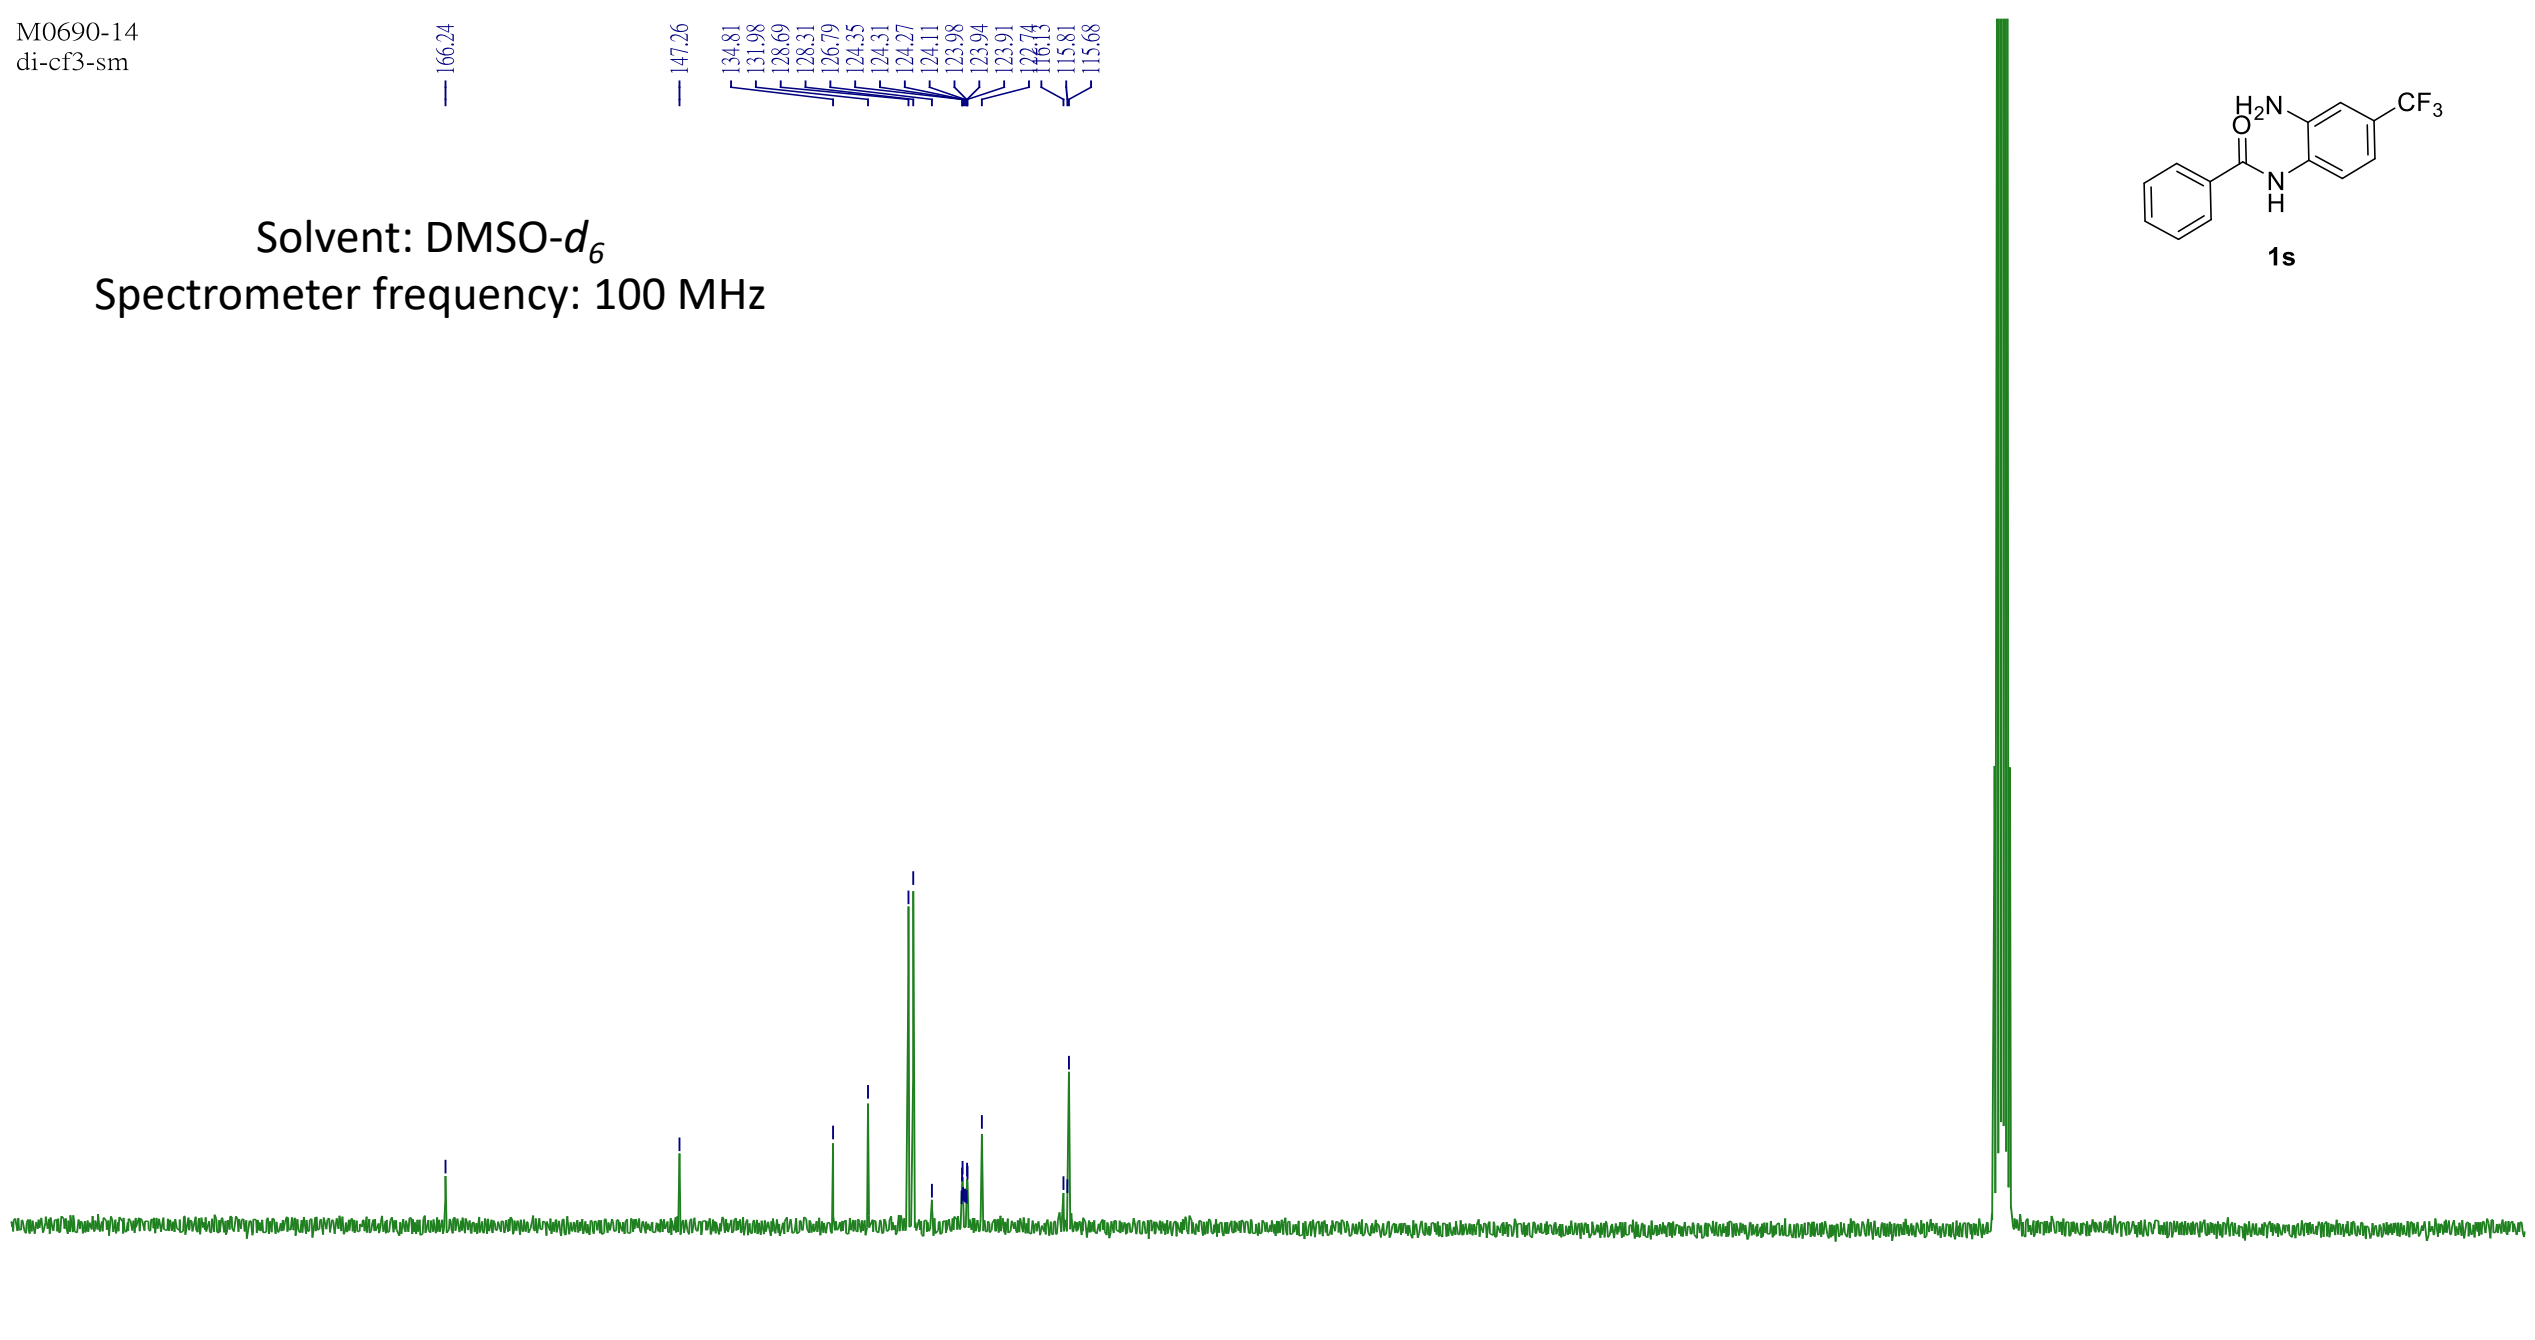



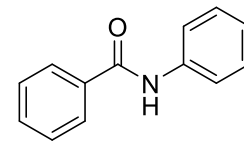

**3a**

Solvent: DMSO- $d_6$   
Spectrometer frequency: 400 MHz

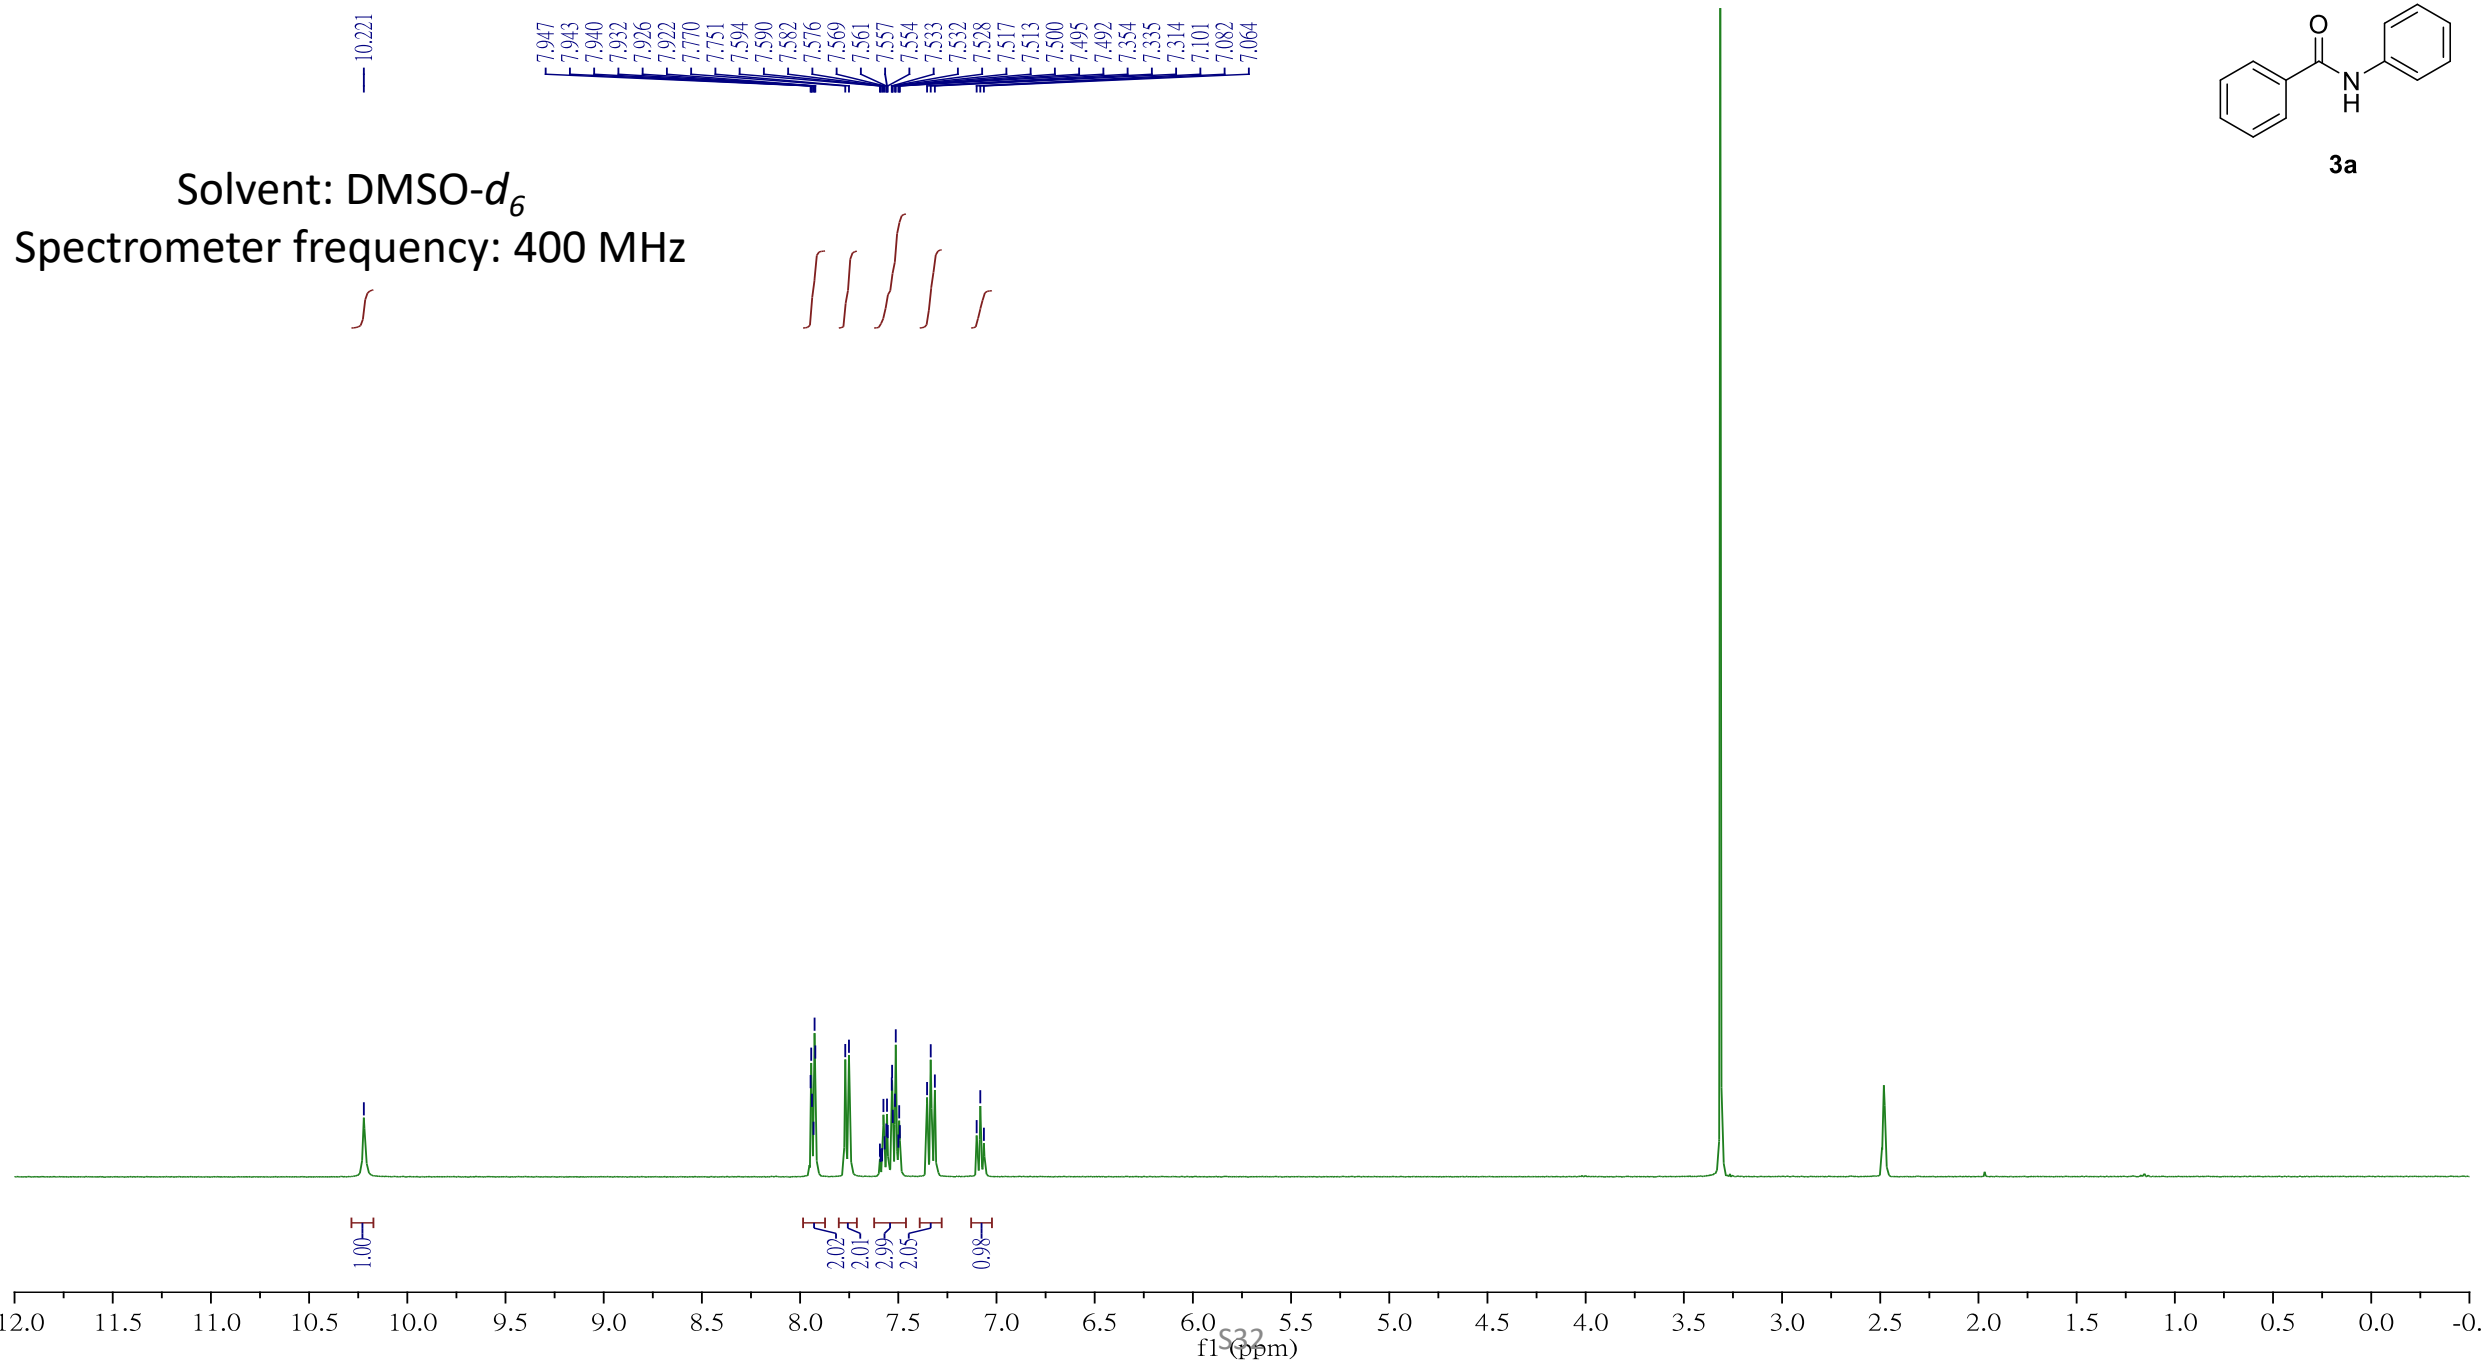

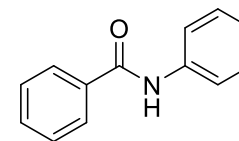

**3a**

Solvent: DMSO- $d_6$   
Spectrometer frequency: 100 MHz

165.982

139.600

135.421

131.972

129.031

128.812

128.074

124.084

120.788

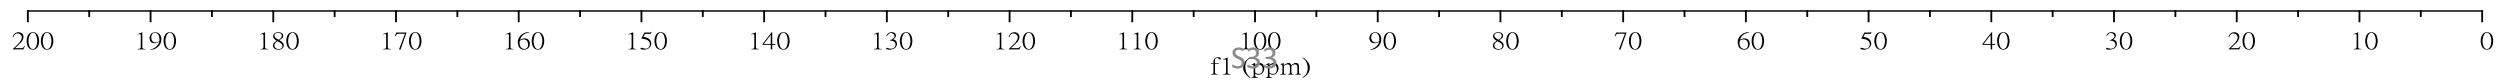

Solvent: DMSO- $d_6$   
Spectrometer frequency: 400 MHz

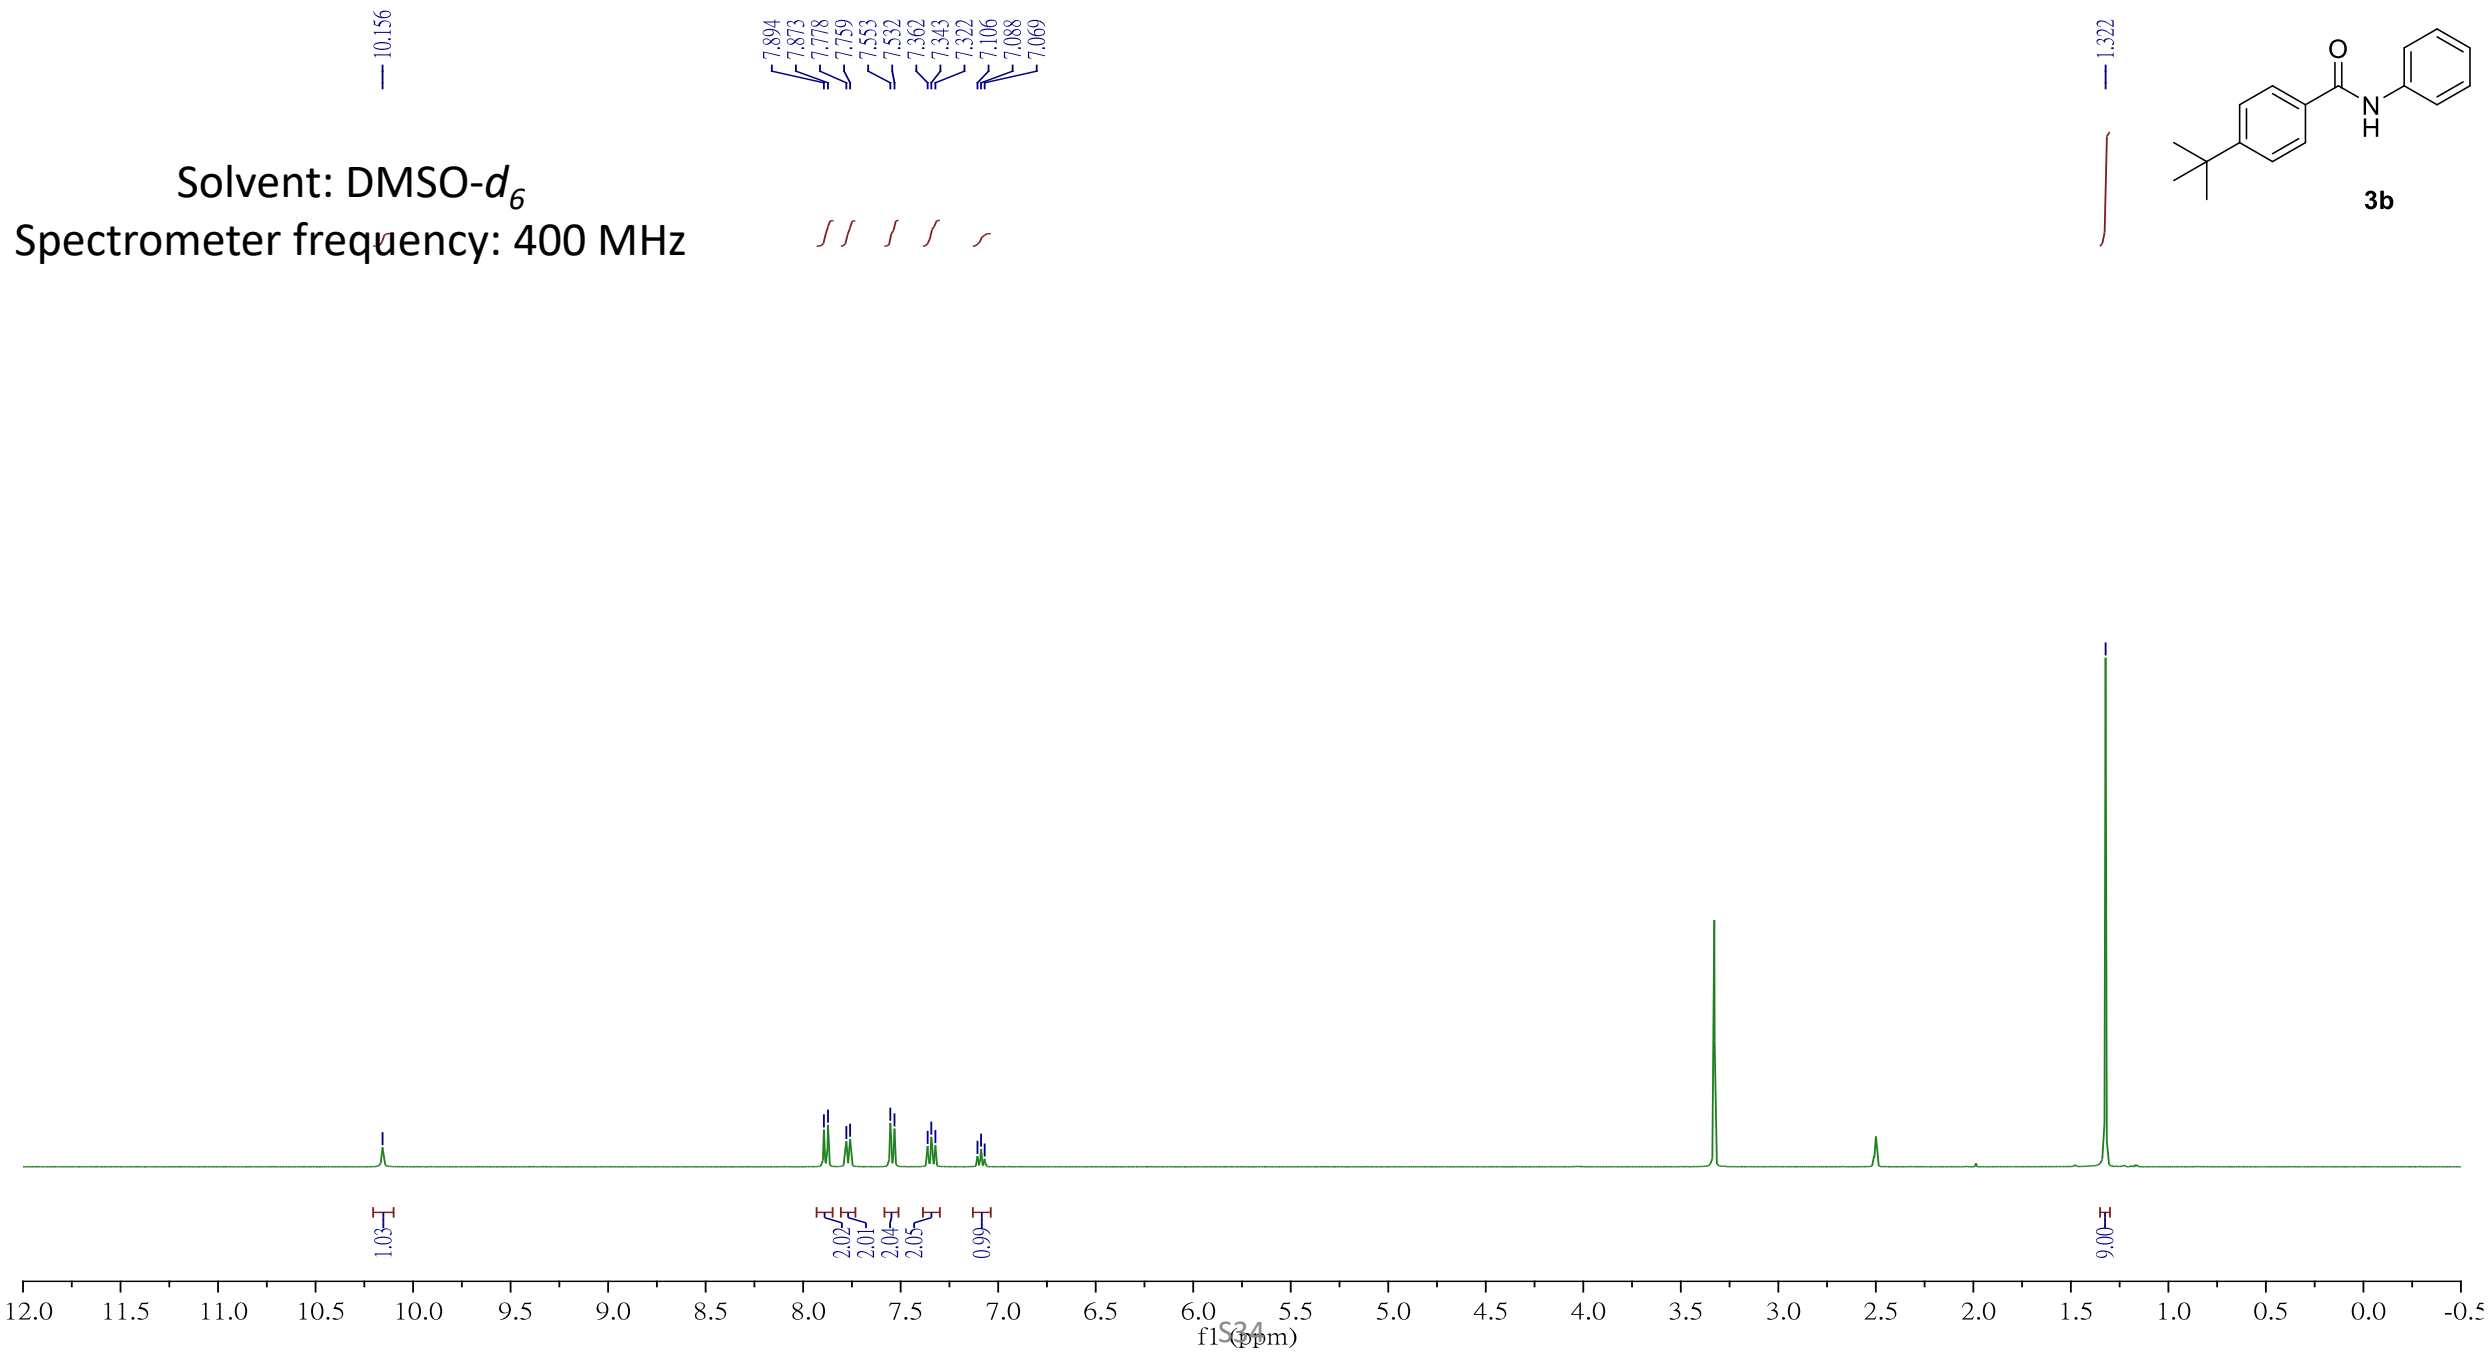

Solvent: DMSO- $d_6$   
Spectrometer frequency: 100 MHz

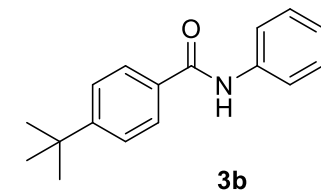

165.926

154.809

139.697

132.729

129.008

127.942

125.576

123.953

120.692

35.119

31.384

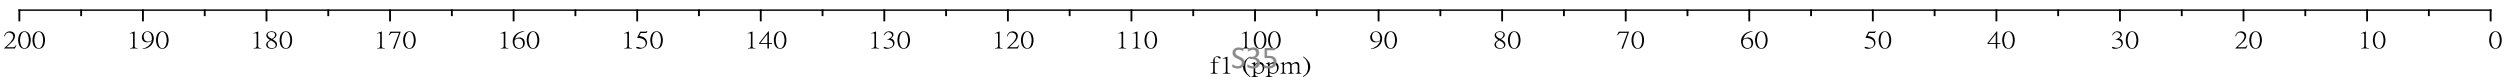

Solvent: DMSO- $d_6$   
Spectrometer frequency: 400 MHz

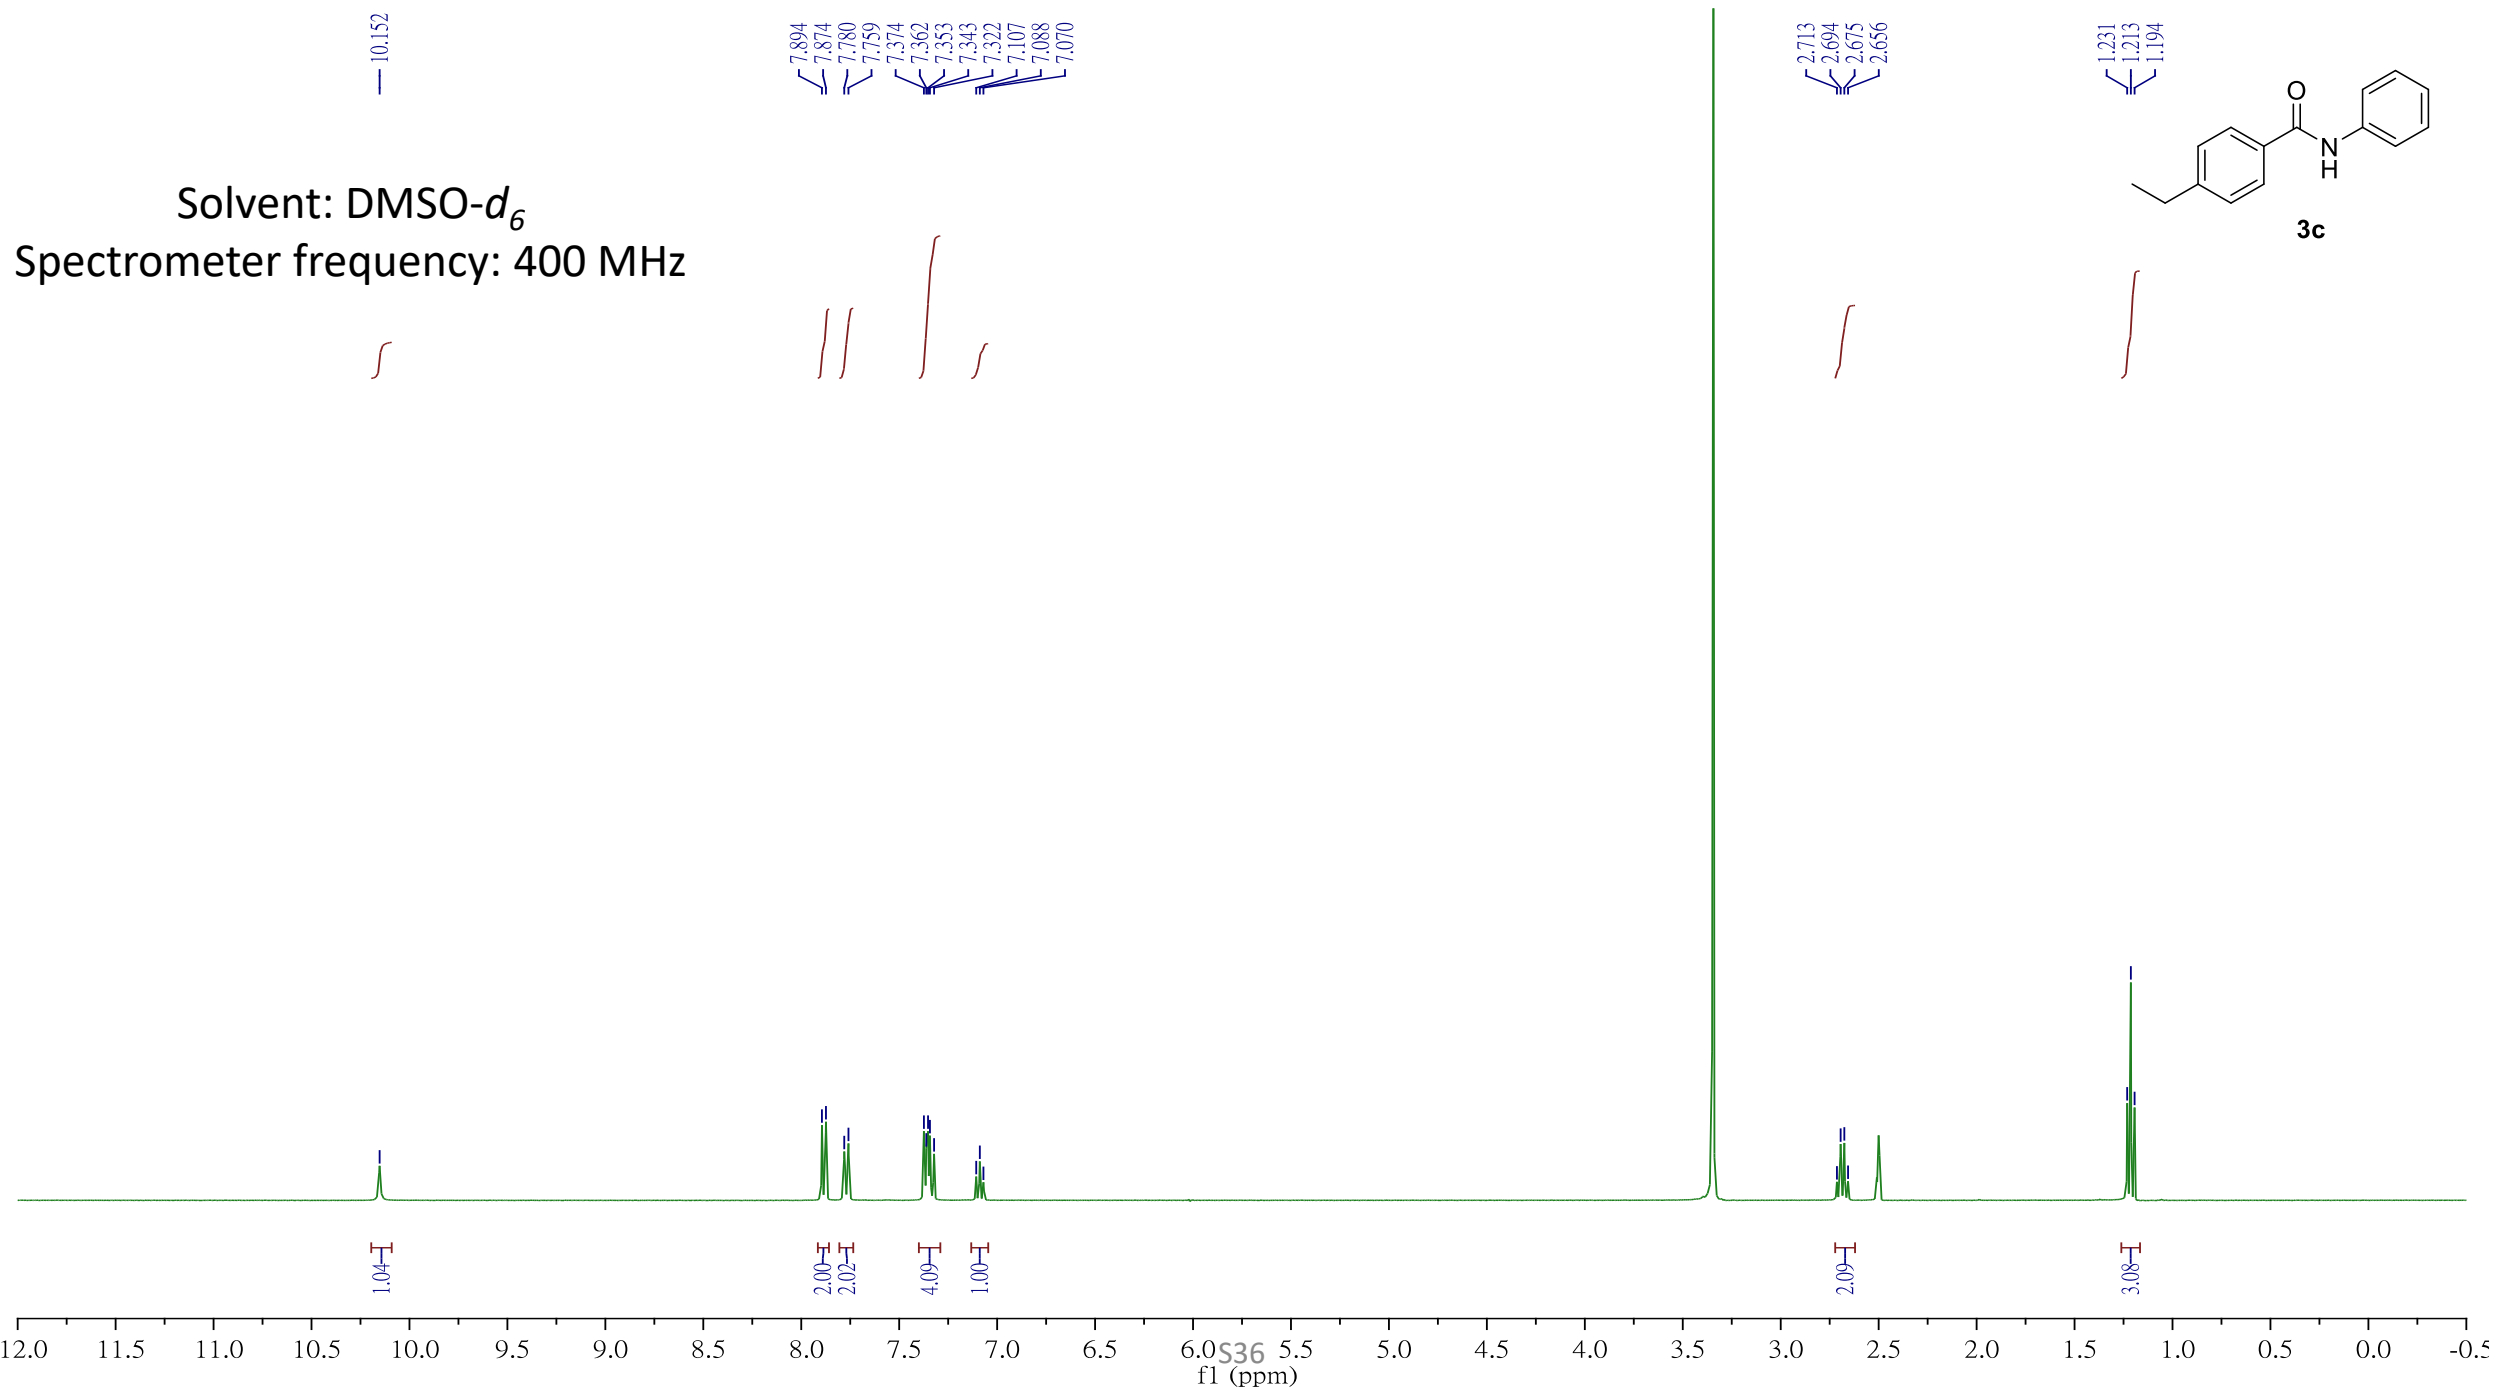

Solvent: DMSO- $d_6$   
Spectrometer frequency: 100 MHz

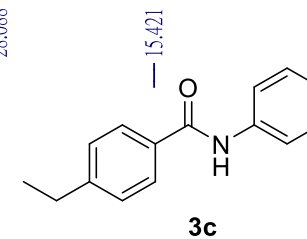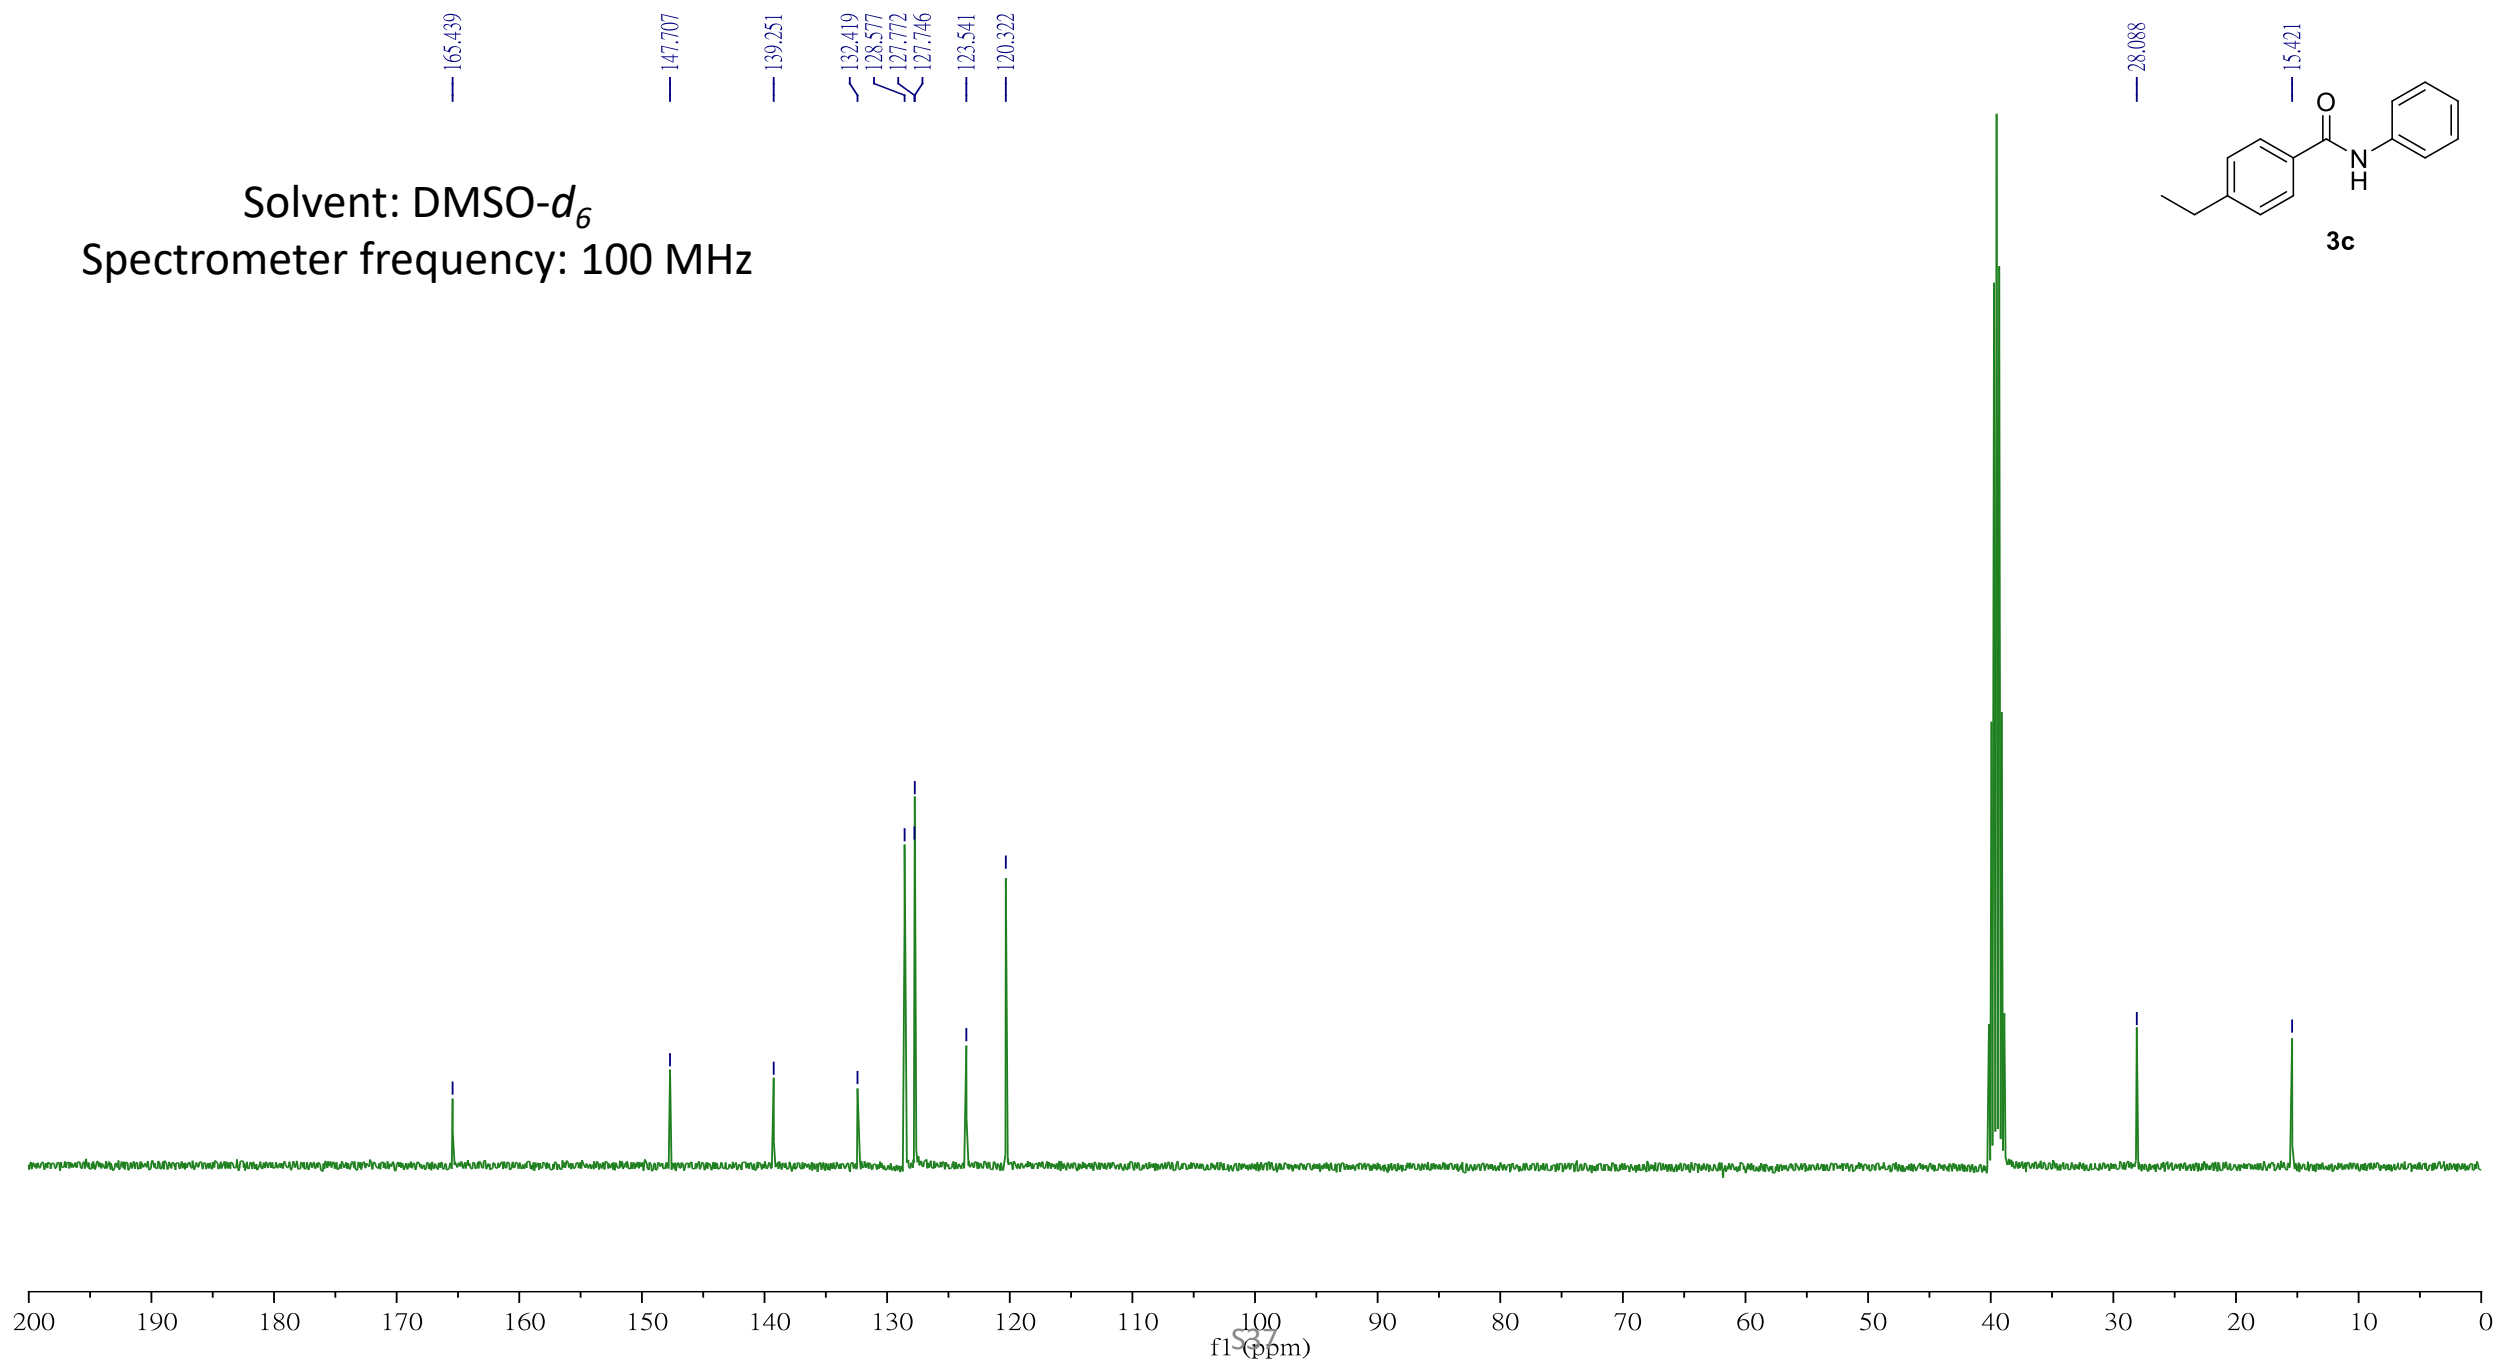

Solvent: DMSO-*d*<sub>6</sub>  
Spectrometer frequency: 400 MHz

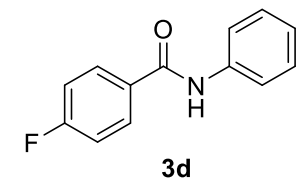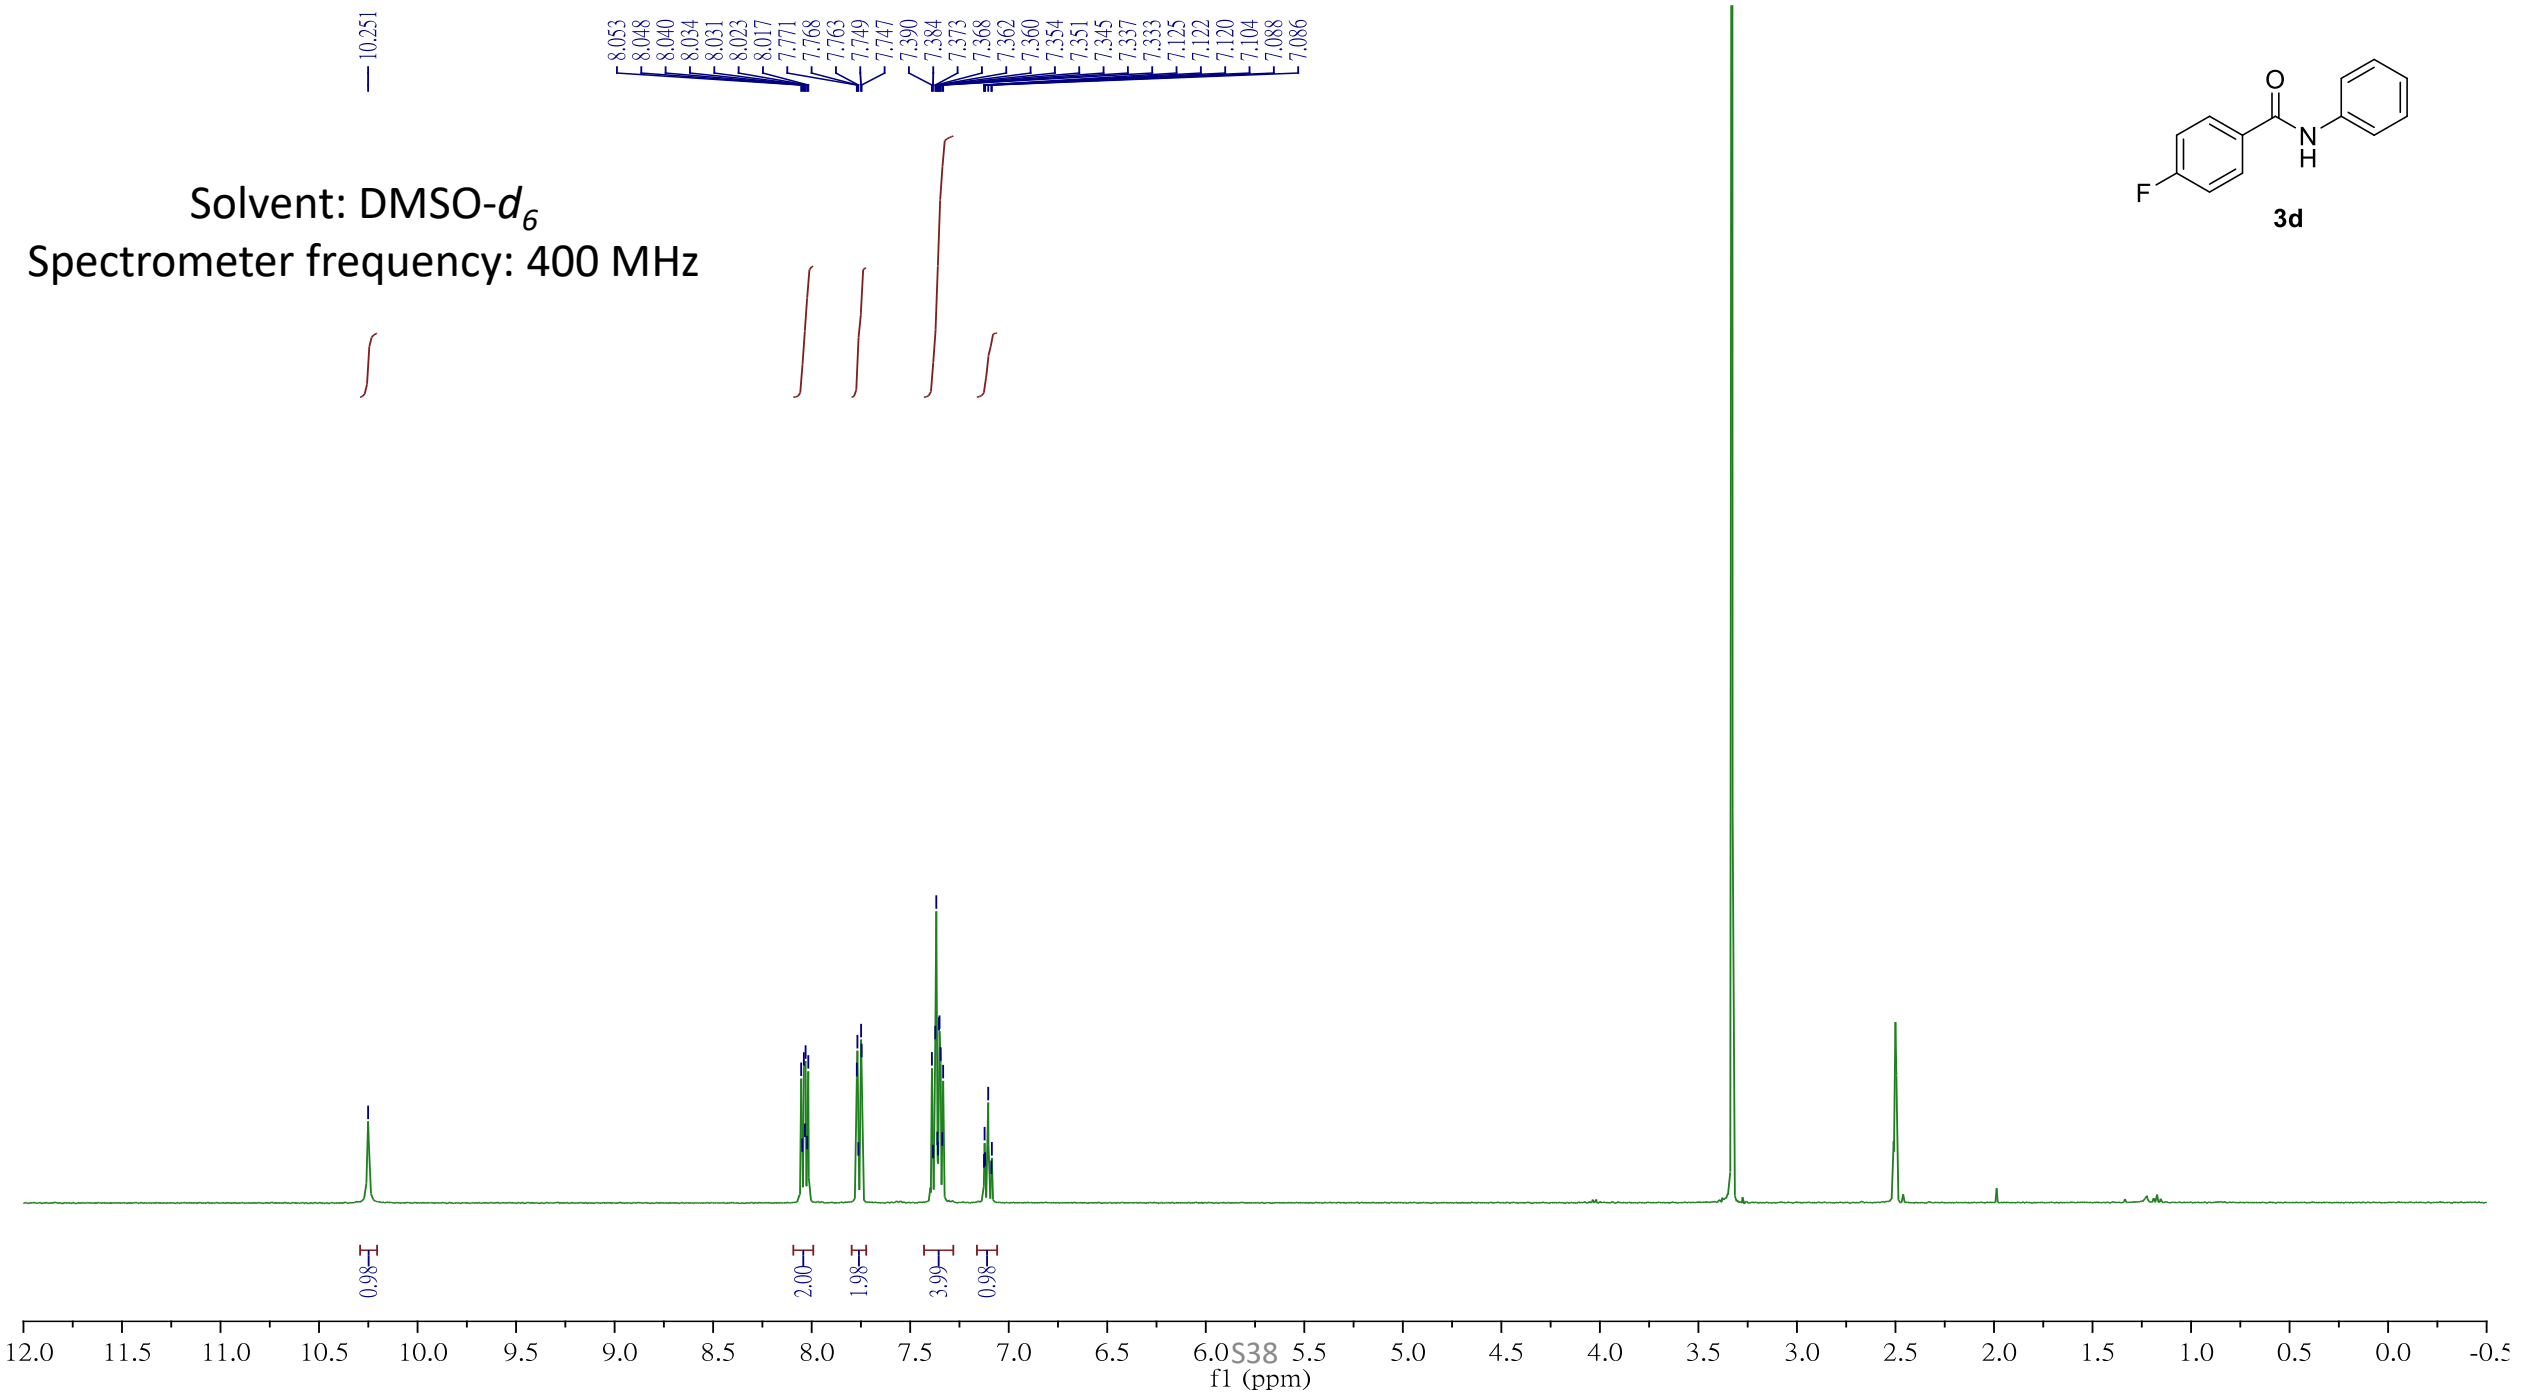

Solvent: DMSO- $d_6$   
Spectrometer frequency: 100 MHz

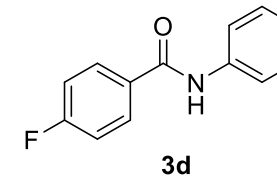

165.71  
164.93  
163.24

139.41  
131.80  
131.77  
130.84  
130.75  
129.06  
124.23  
120.87  
115.87  
115.66

200 190 180 170 160 150 140 130 120 110 100 90 80 70 60 50 40 30 20 10 0

500  
f1 (ppm)

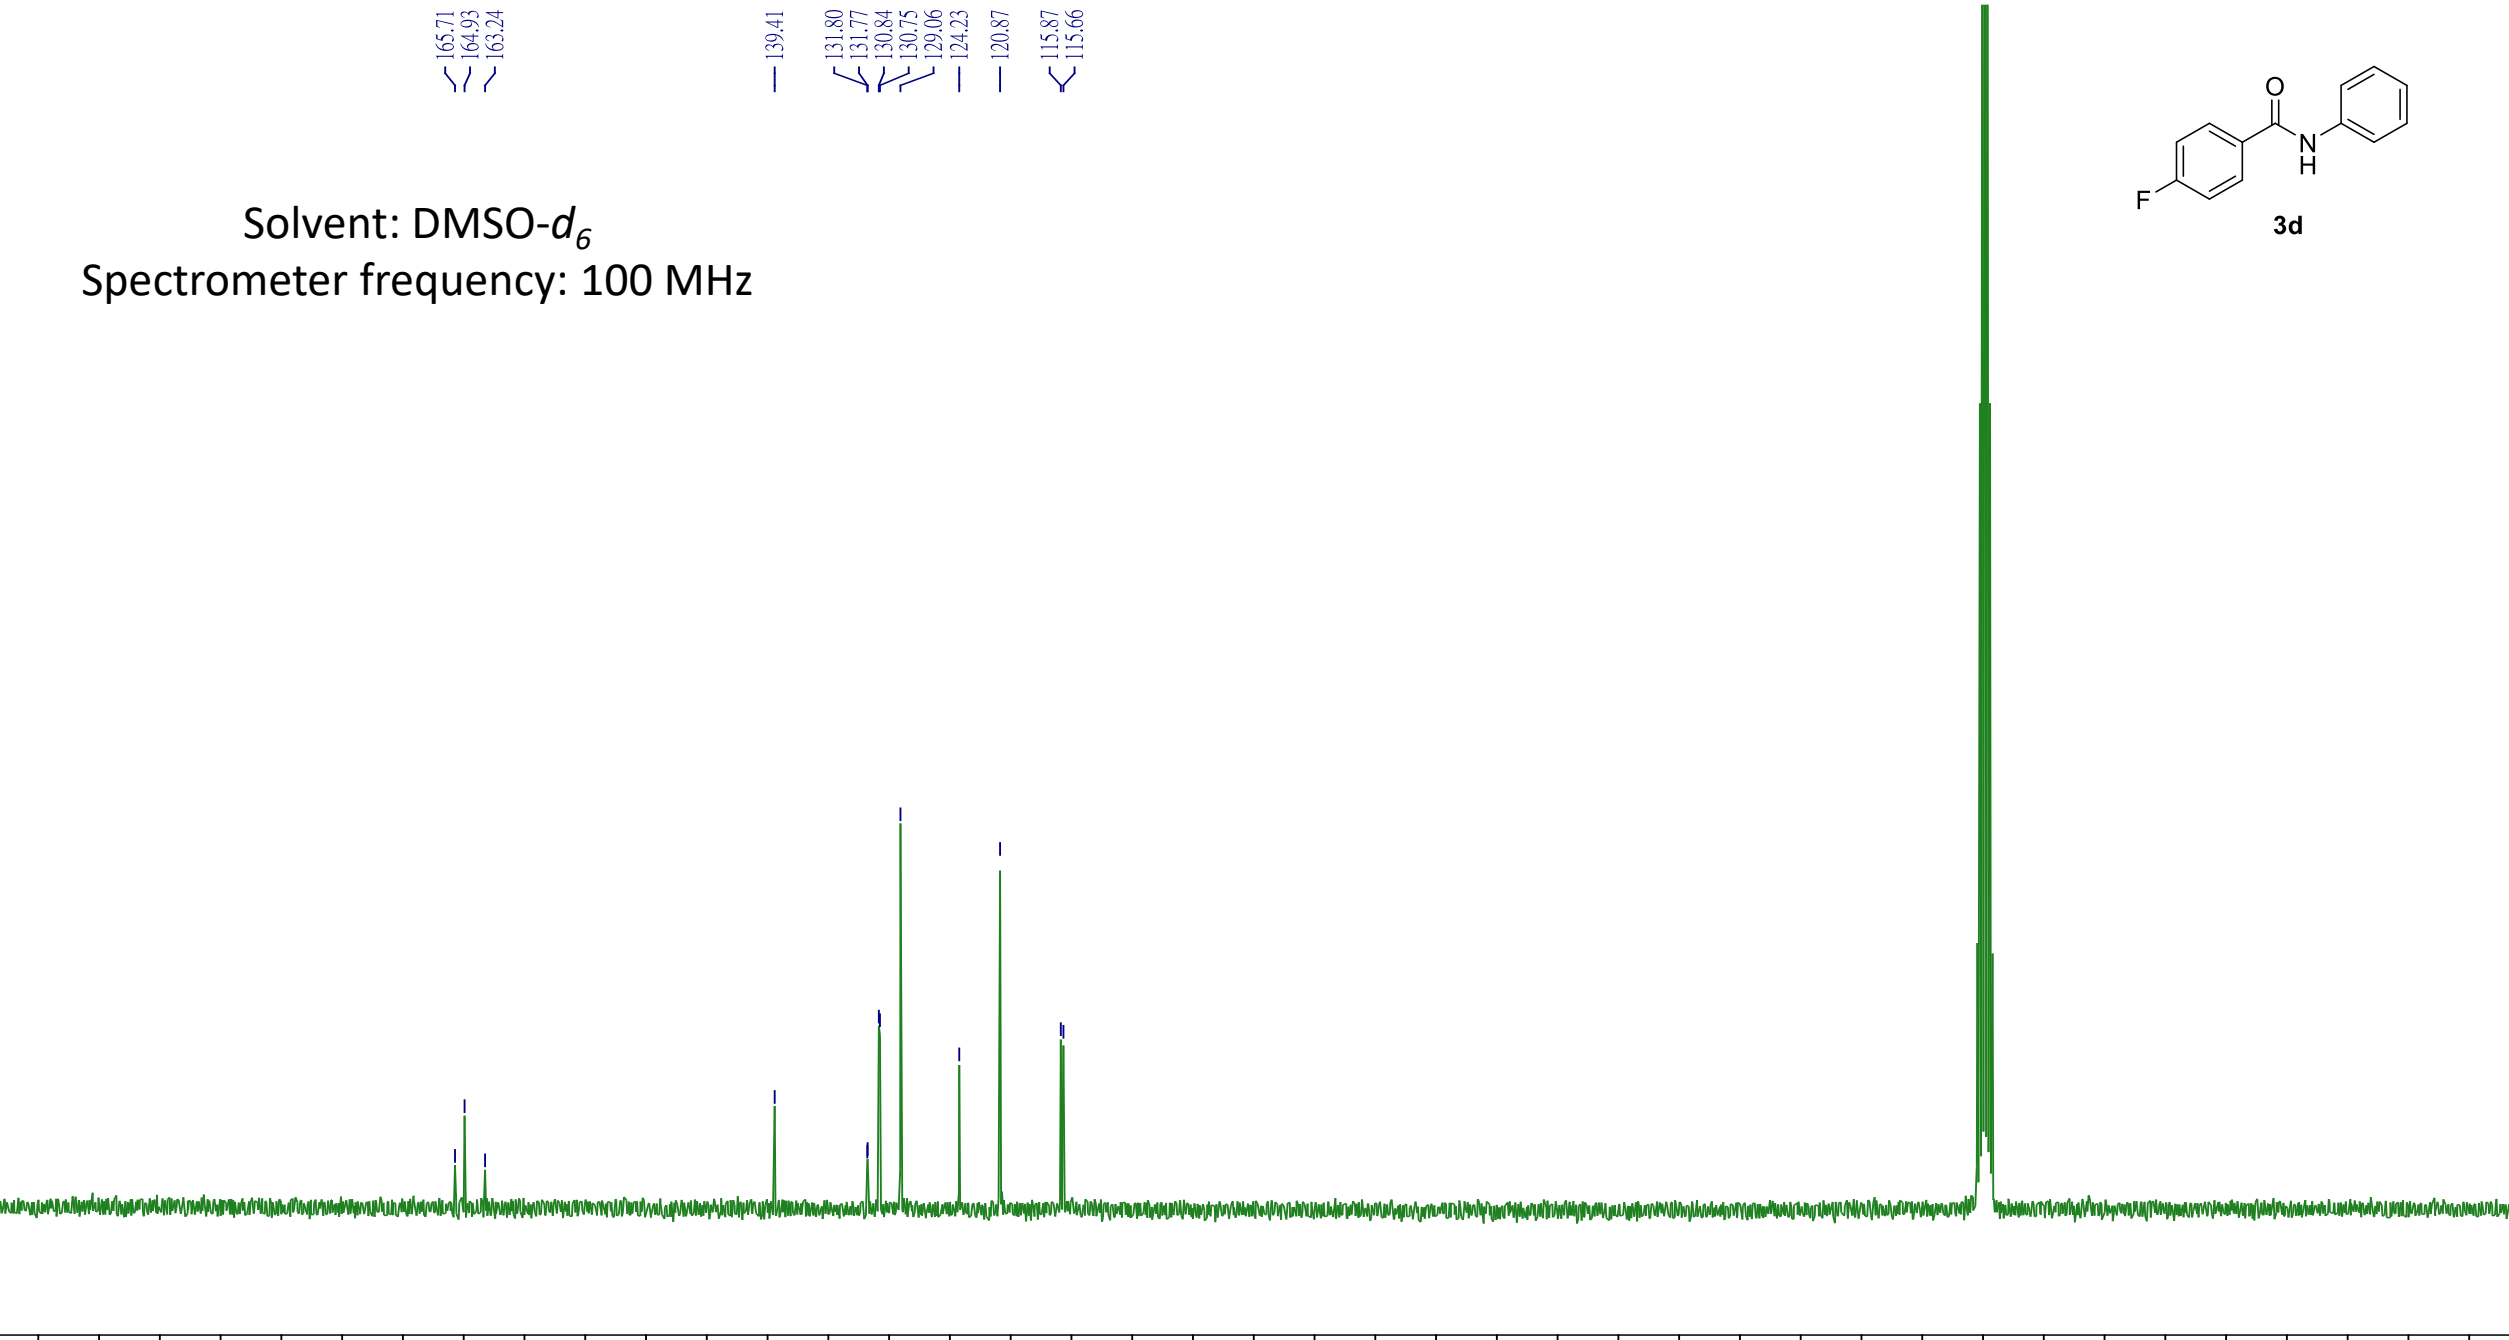



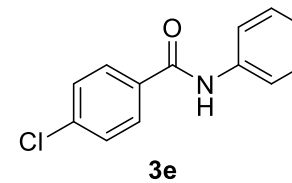

Solvent: DMSO- $d_6$   
Spectrometer frequency: 400 MHz

10.302  
7.993  
7.972  
7.768  
7.750  
7.621  
7.599  
7.376  
7.357  
7.336  
7.129  
7.110  
7.092

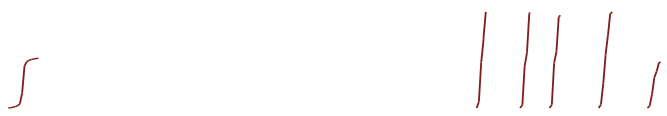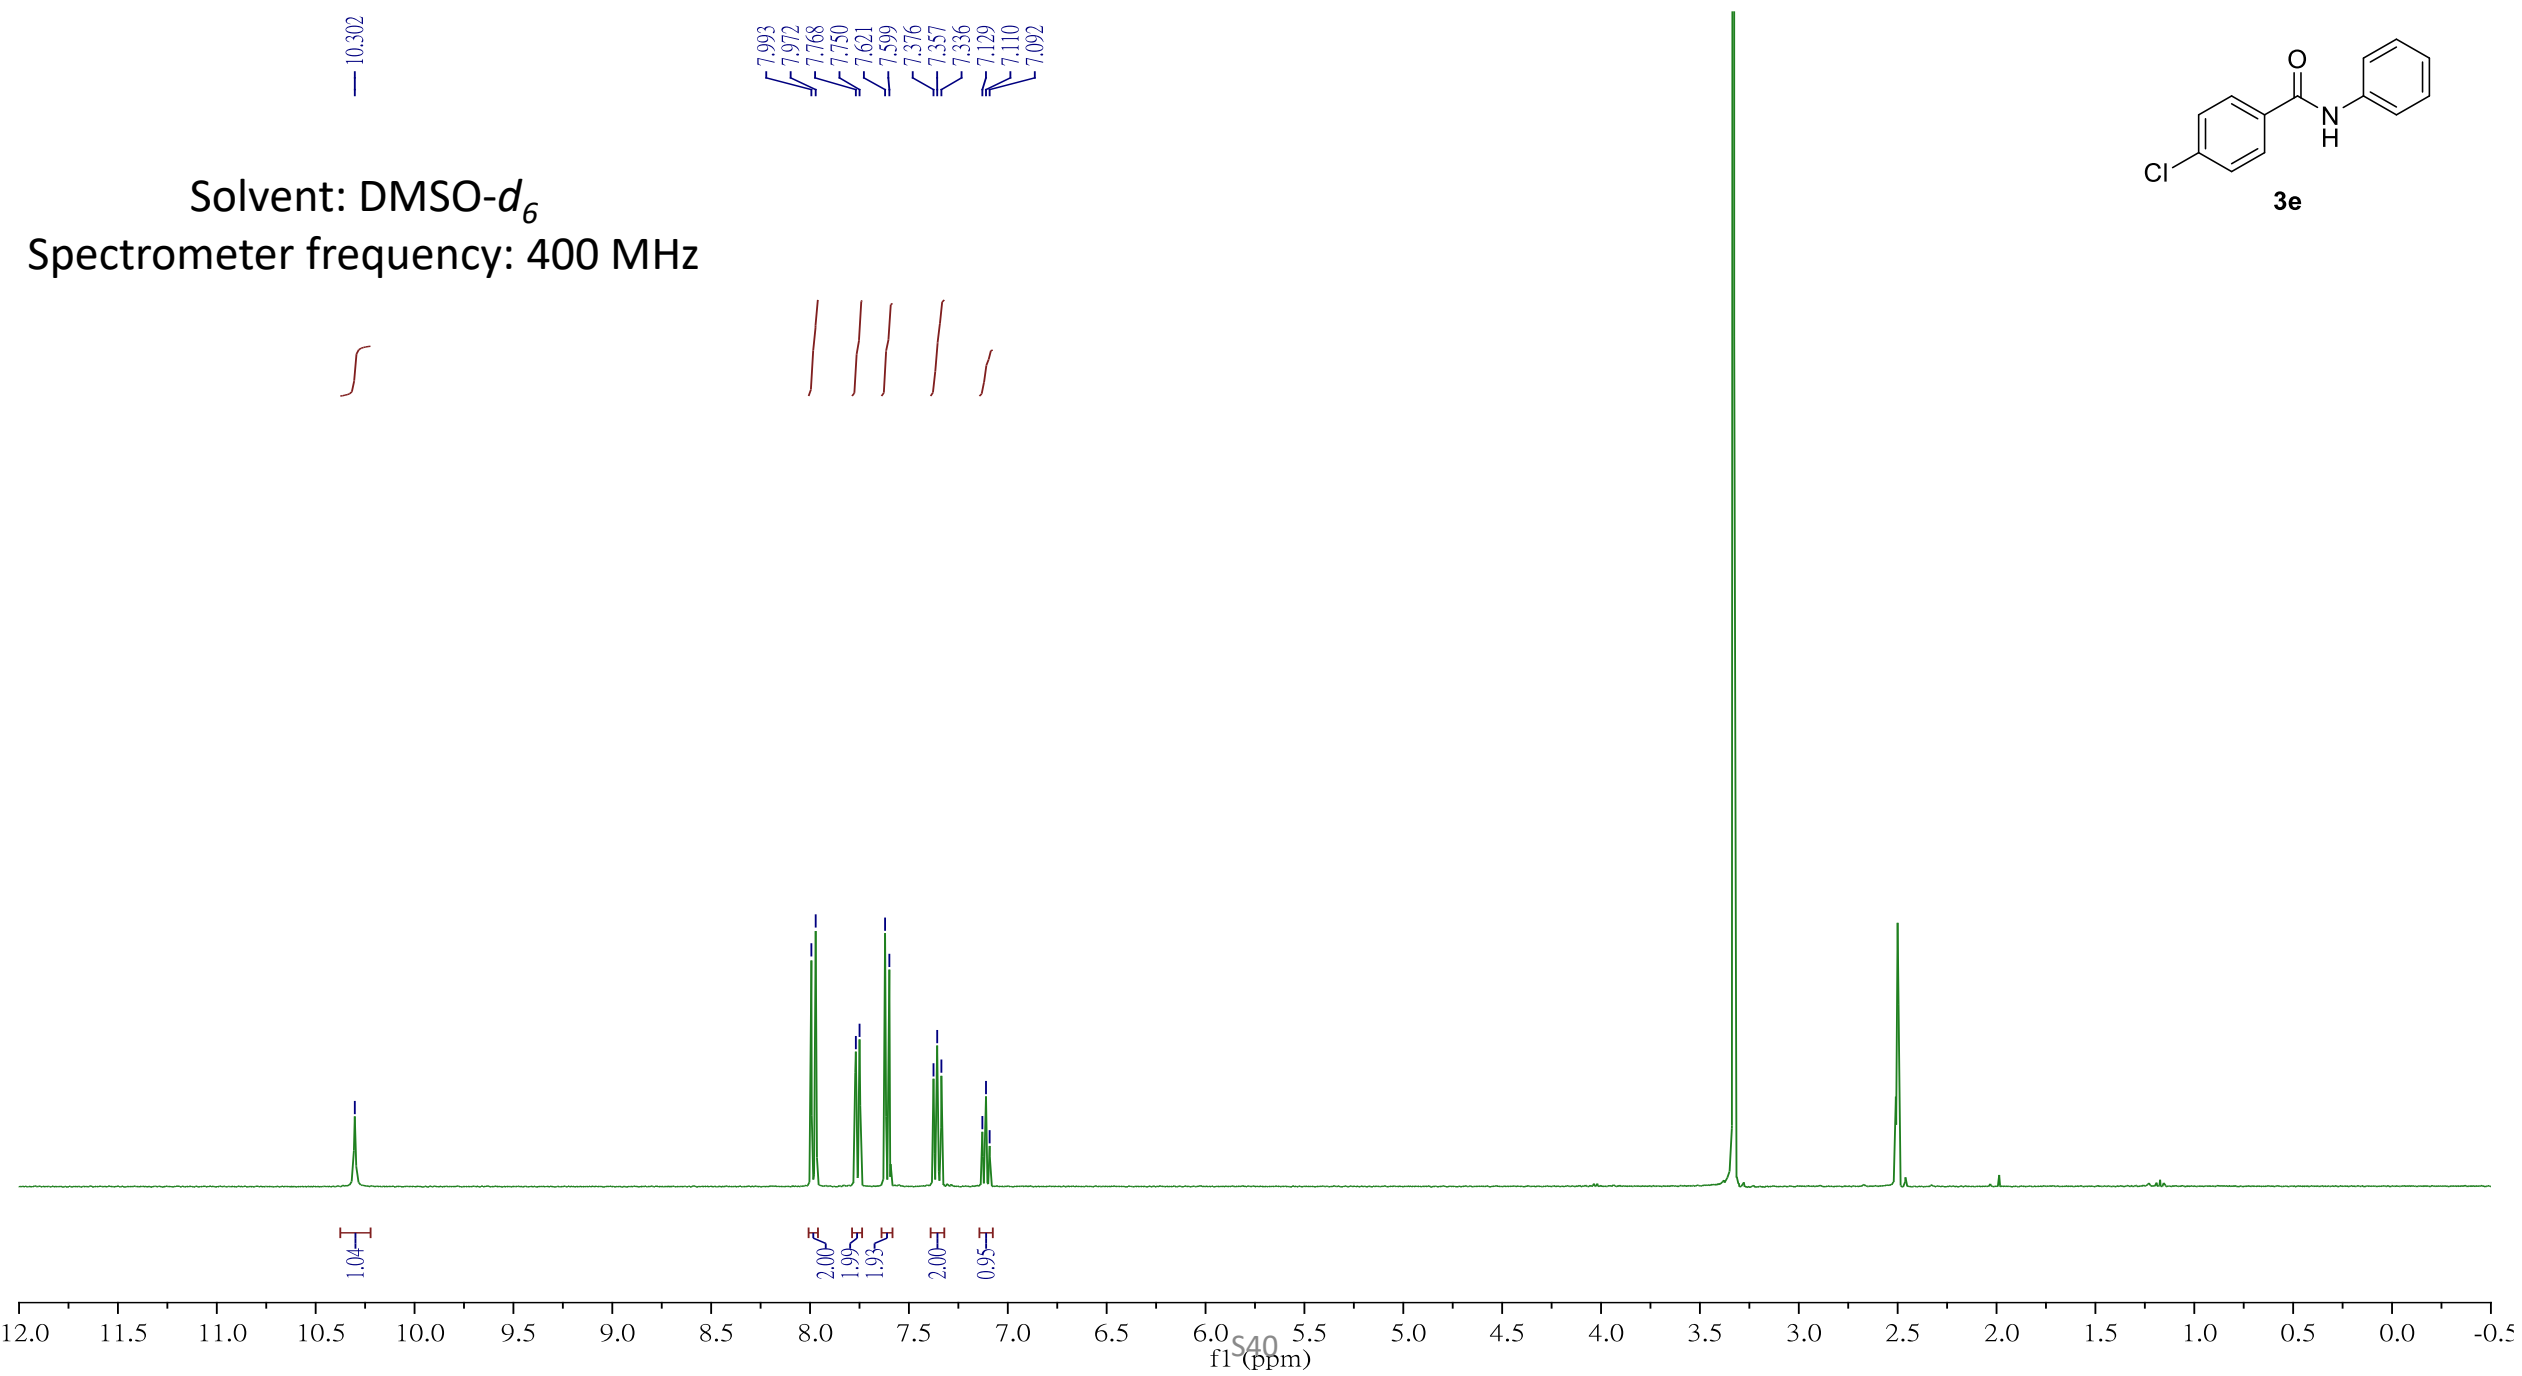

1.04  
2.00  
1.99  
1.93  
2.00  
0.95

f1 (ppm)

Solvent: DMSO-*d*<sub>6</sub>  
Spectrometer frequency: 100 MHz

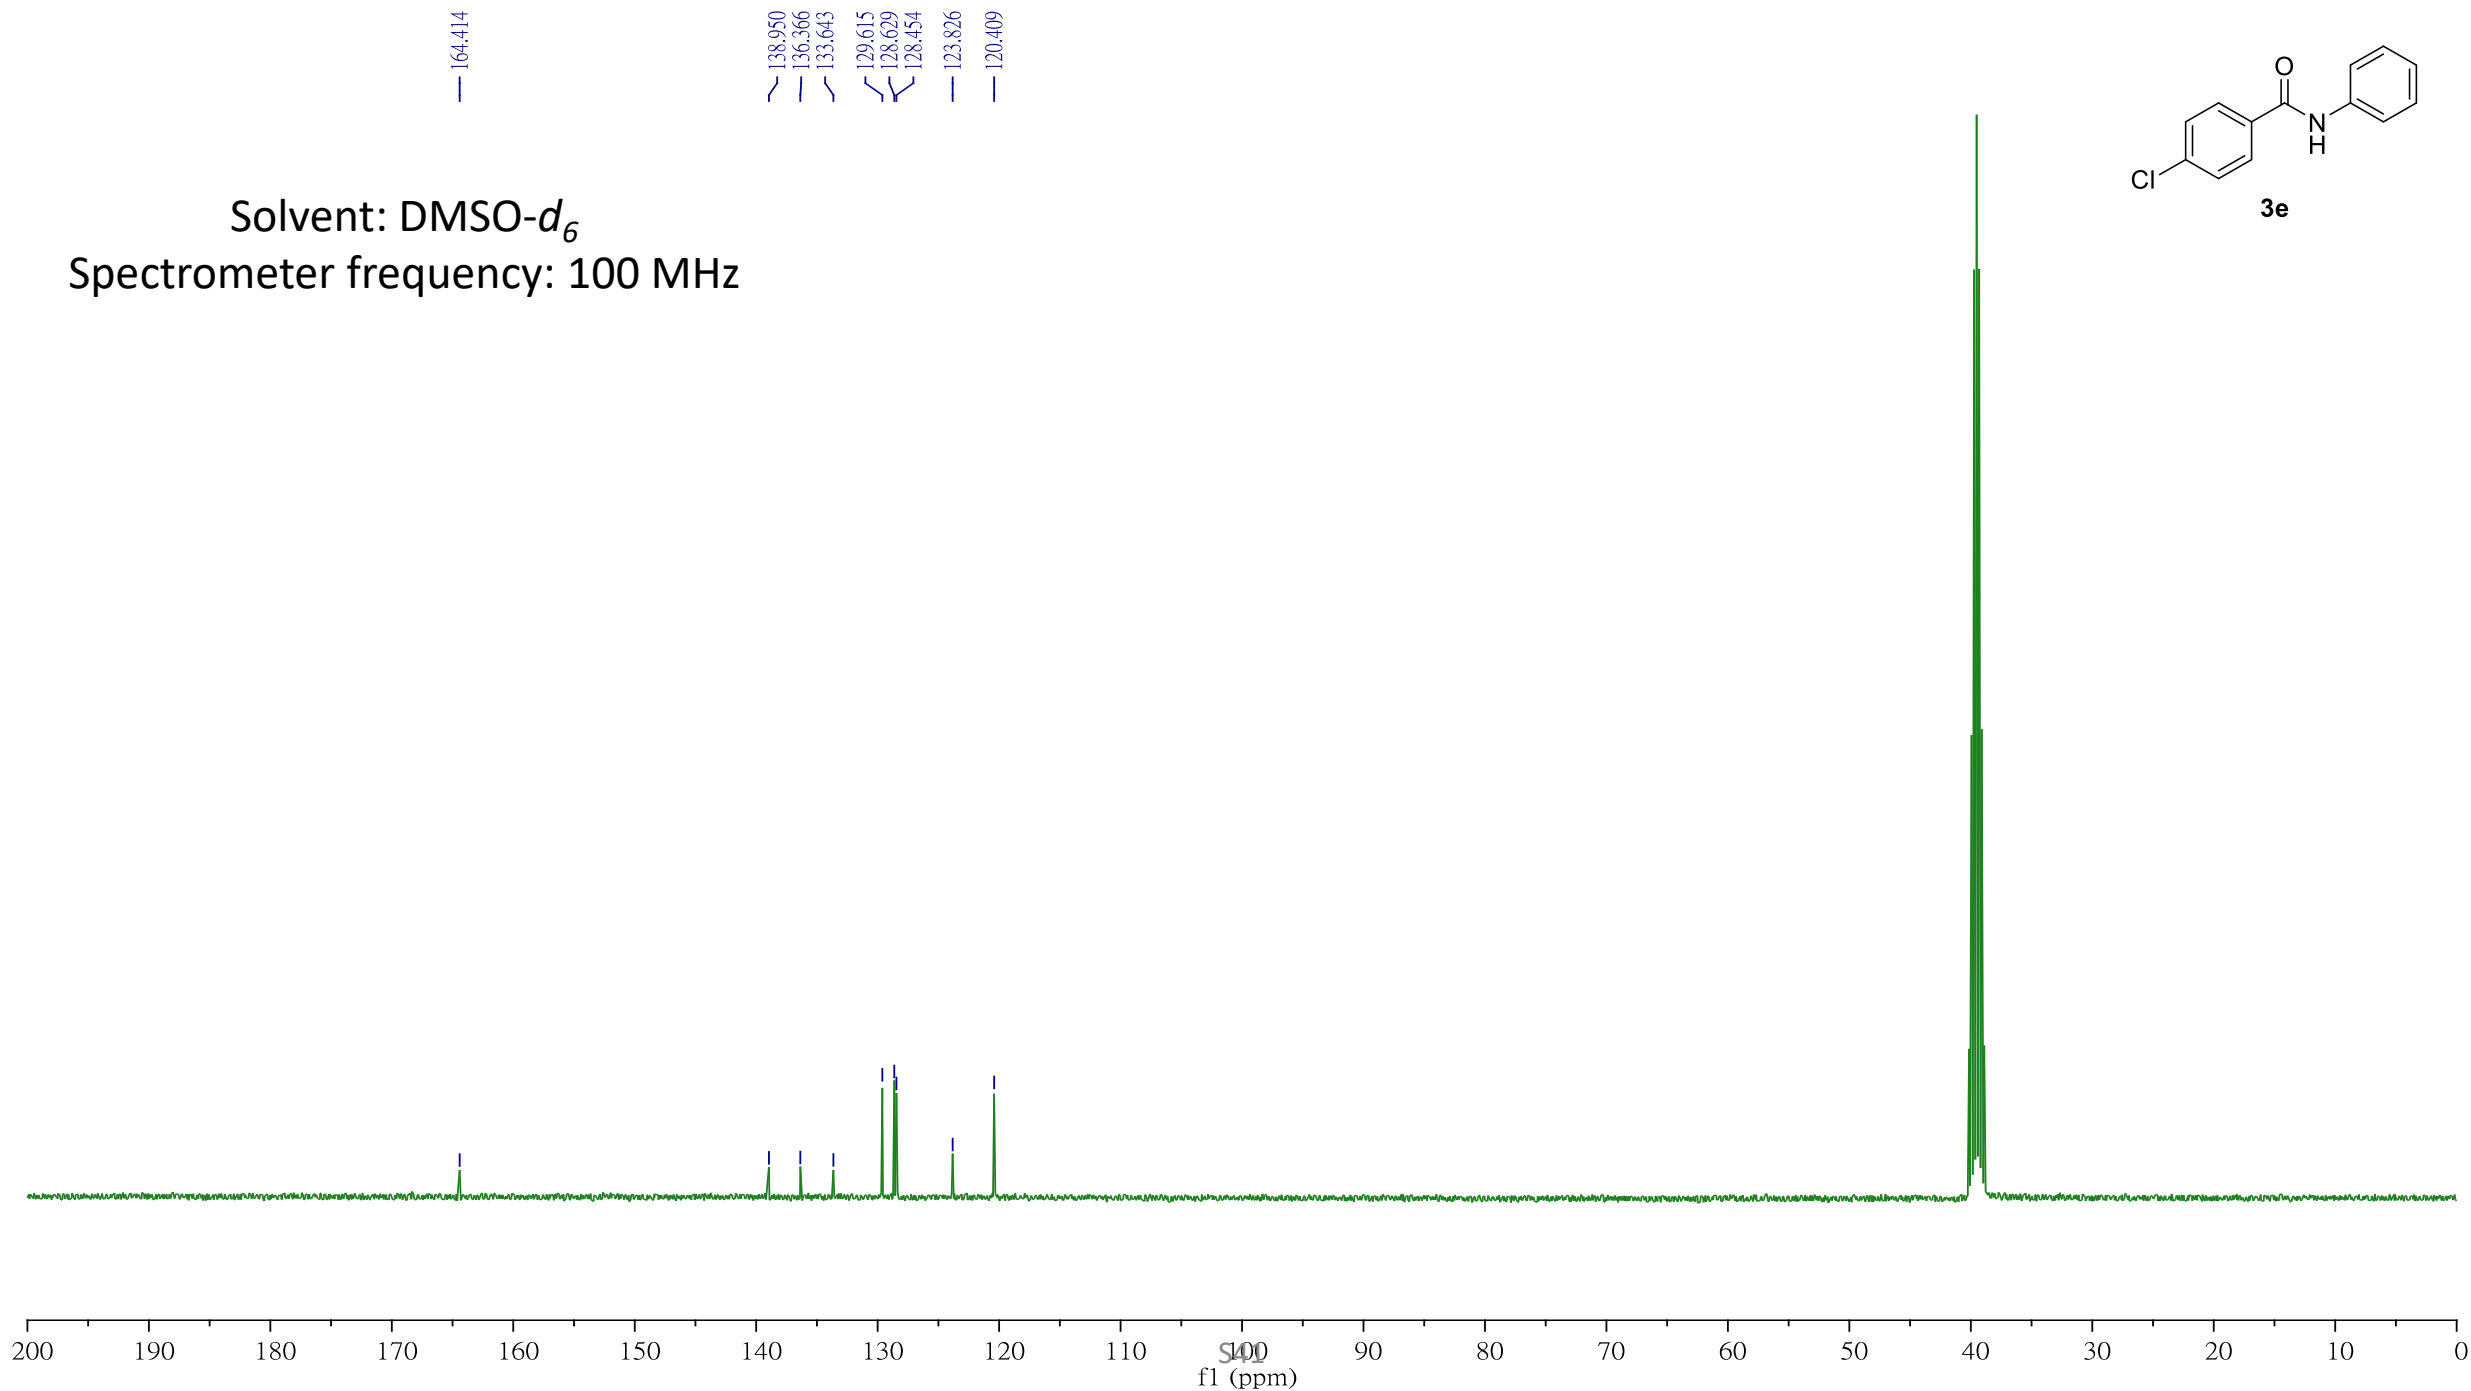

Solvent: DMSO- $d_6$   
Spectrometer frequency: 400 MHz

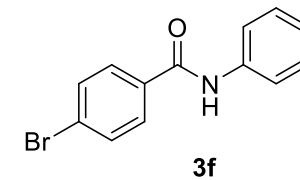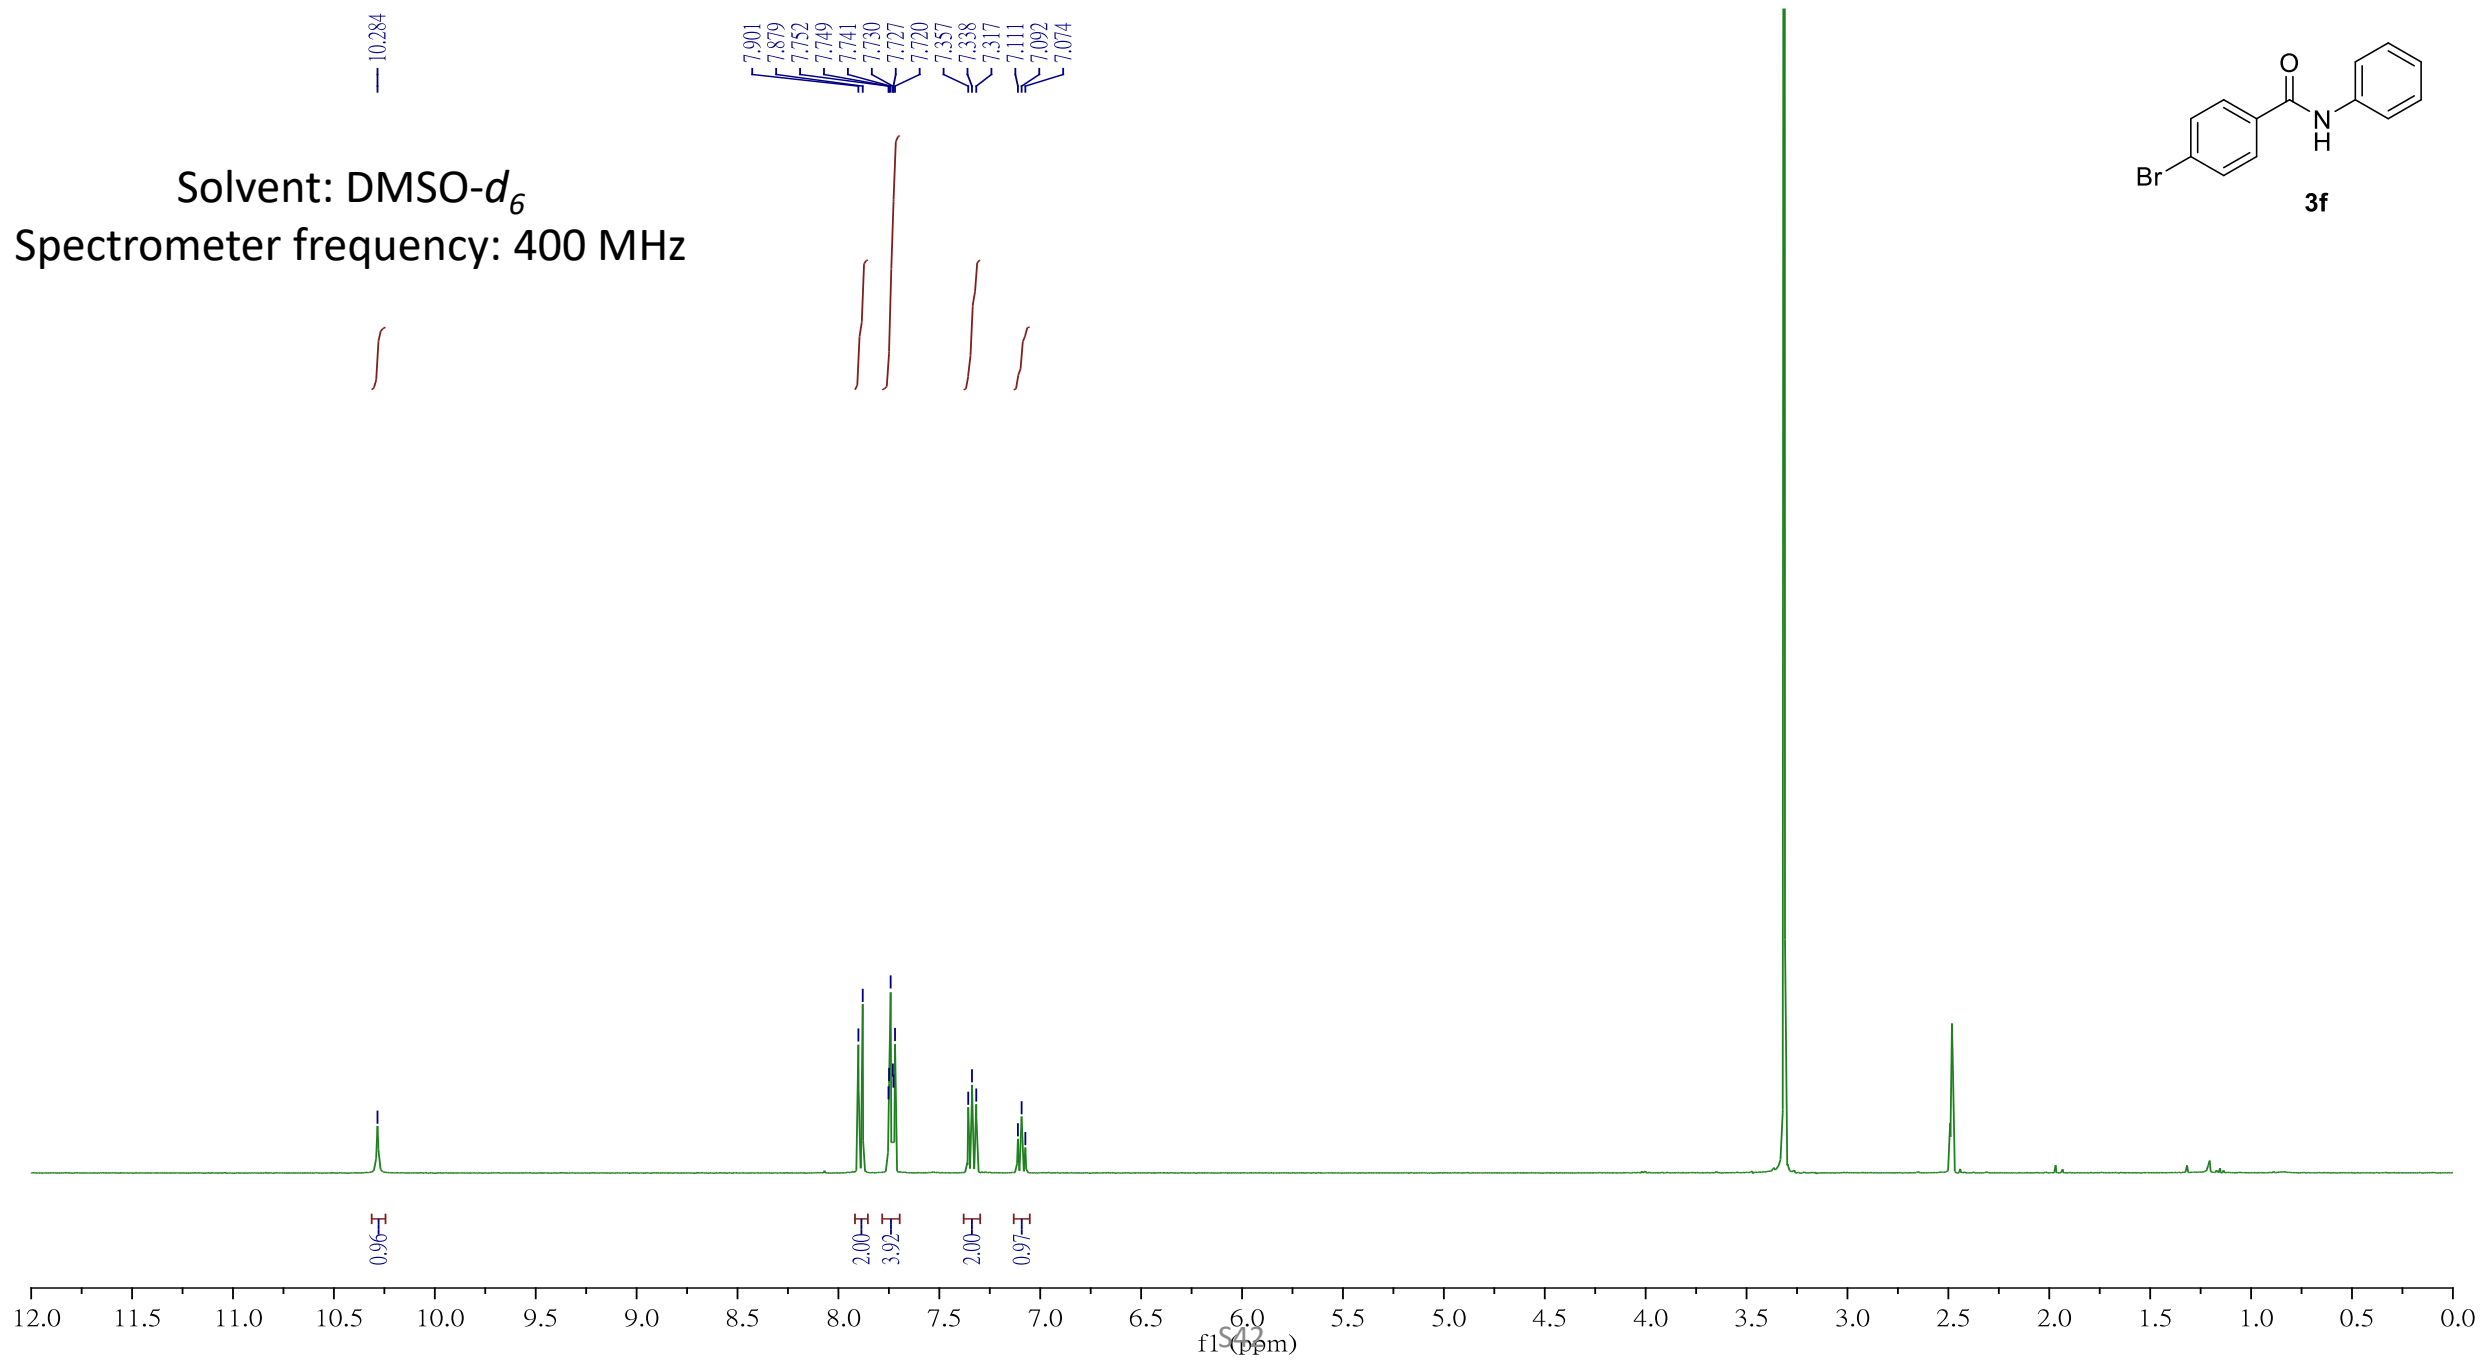

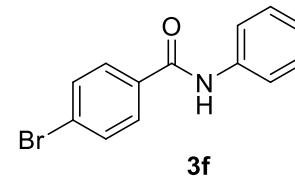

Solvent: DMSO- $d_6$   
Spectrometer frequency: 100 MHz

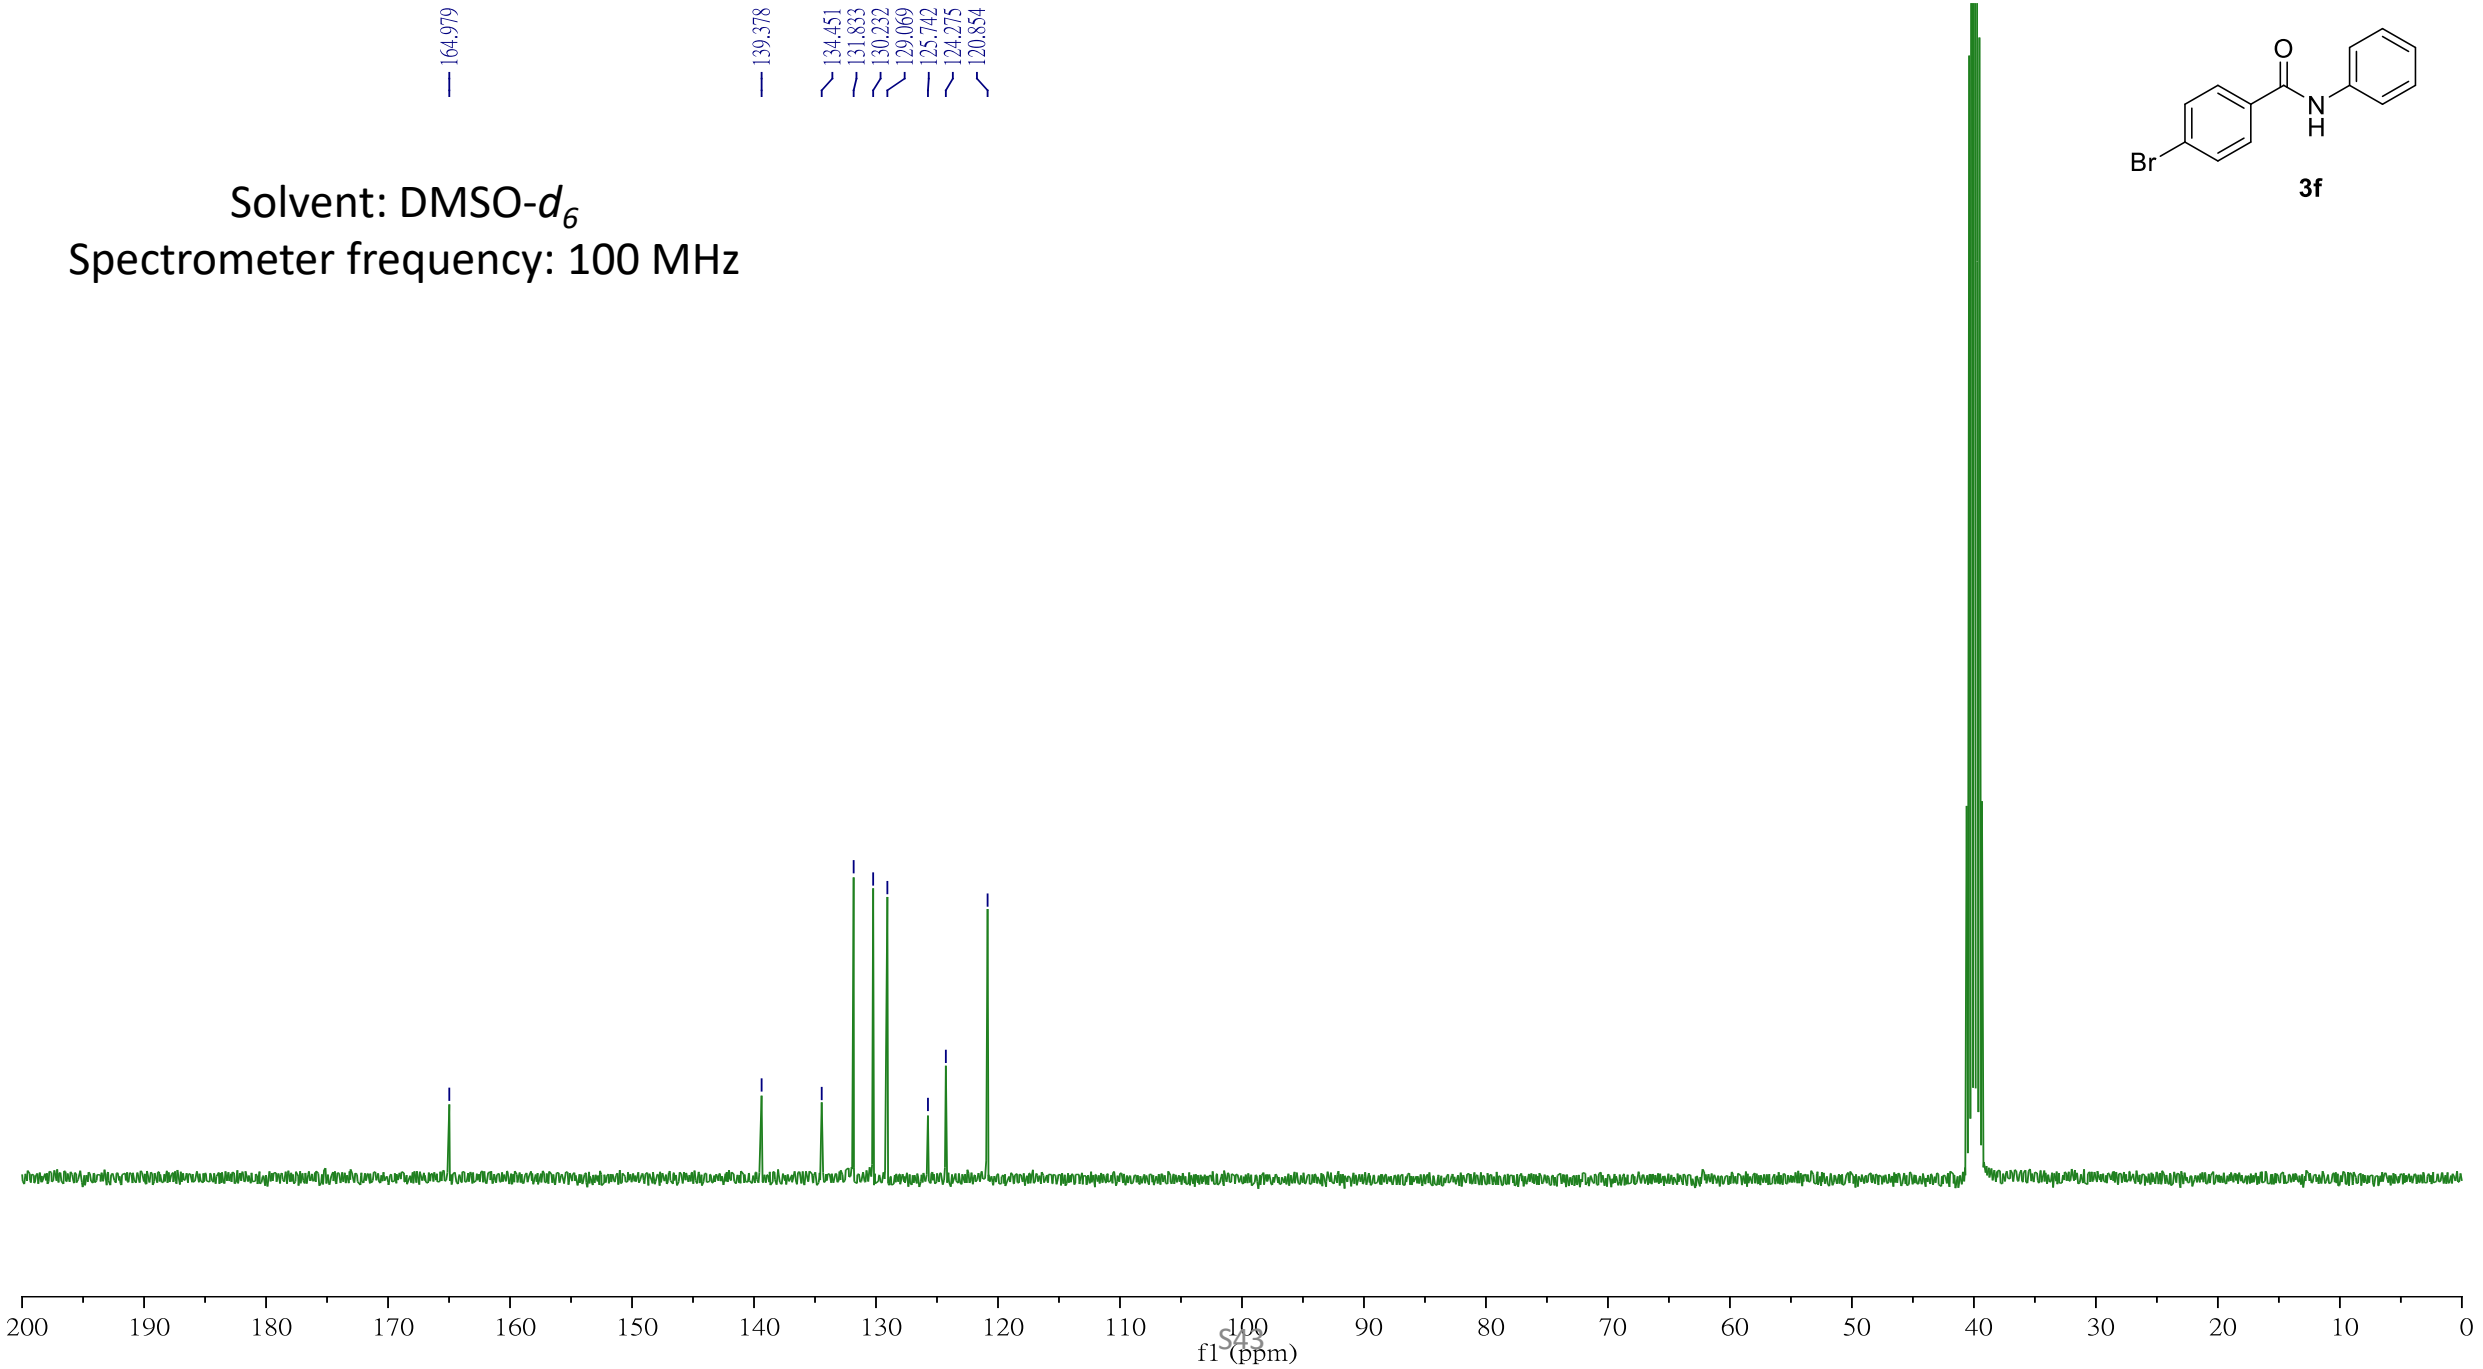

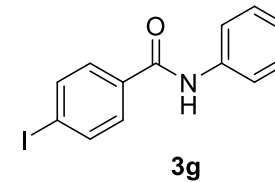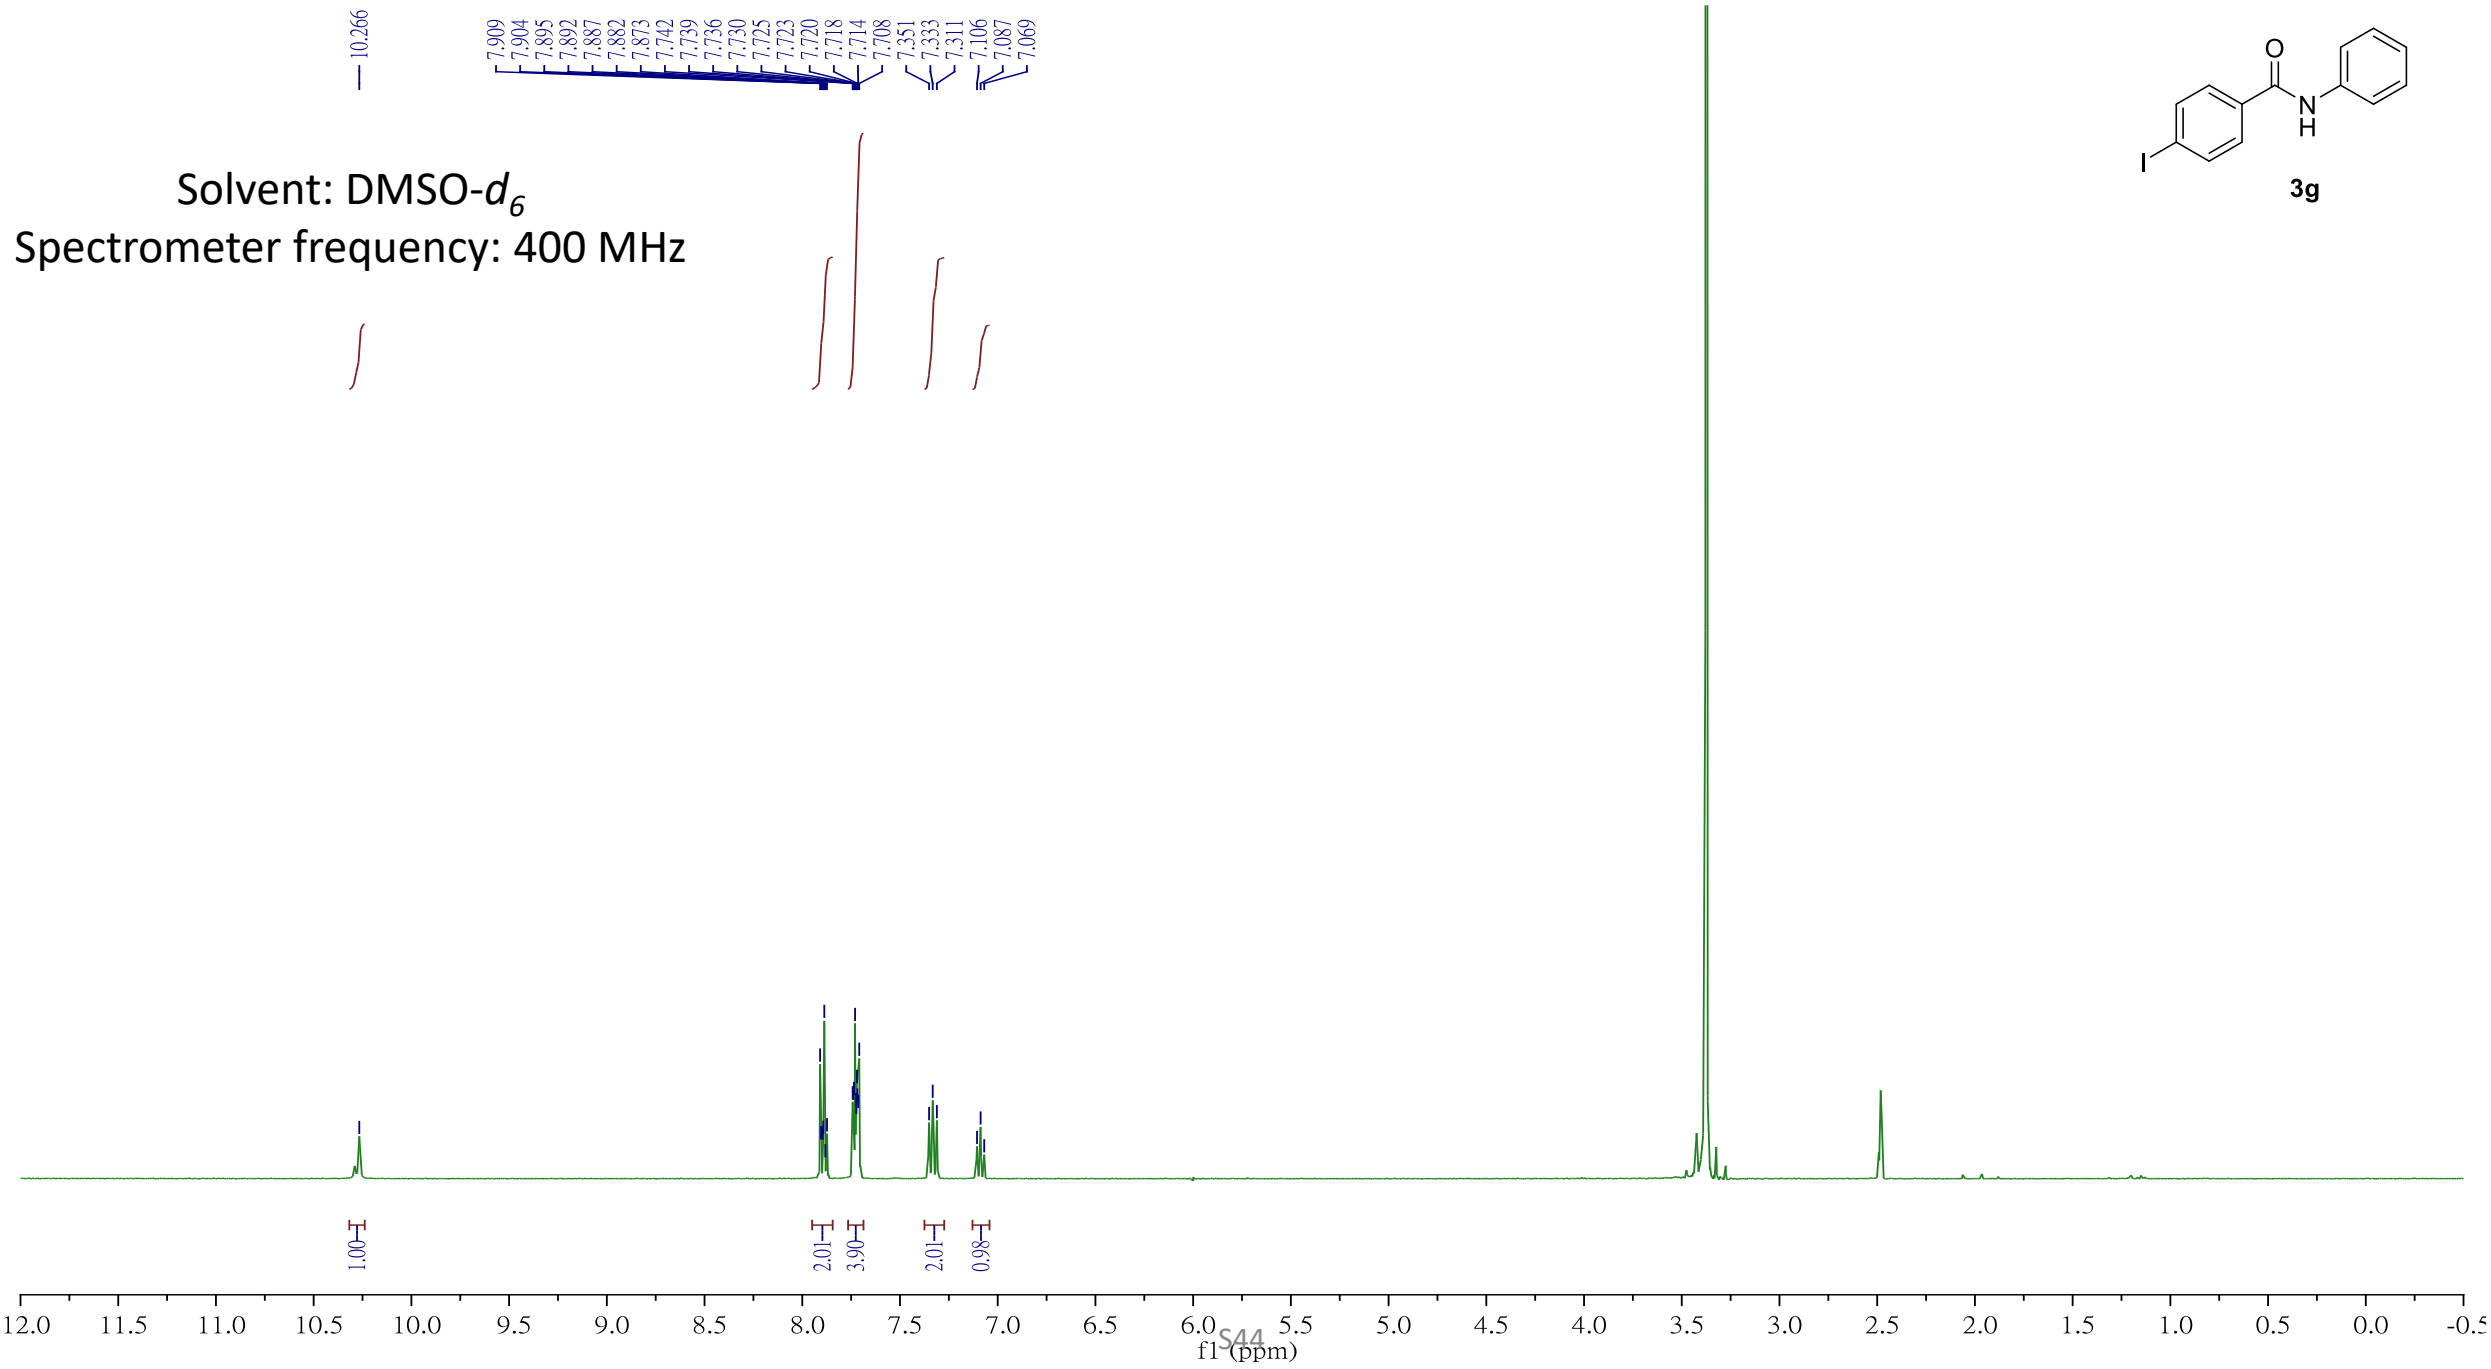

Solvent: DMSO- $d_6$   
Spectrometer frequency: 100 MHz

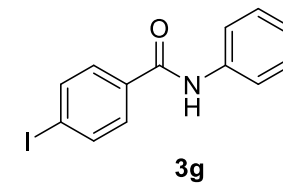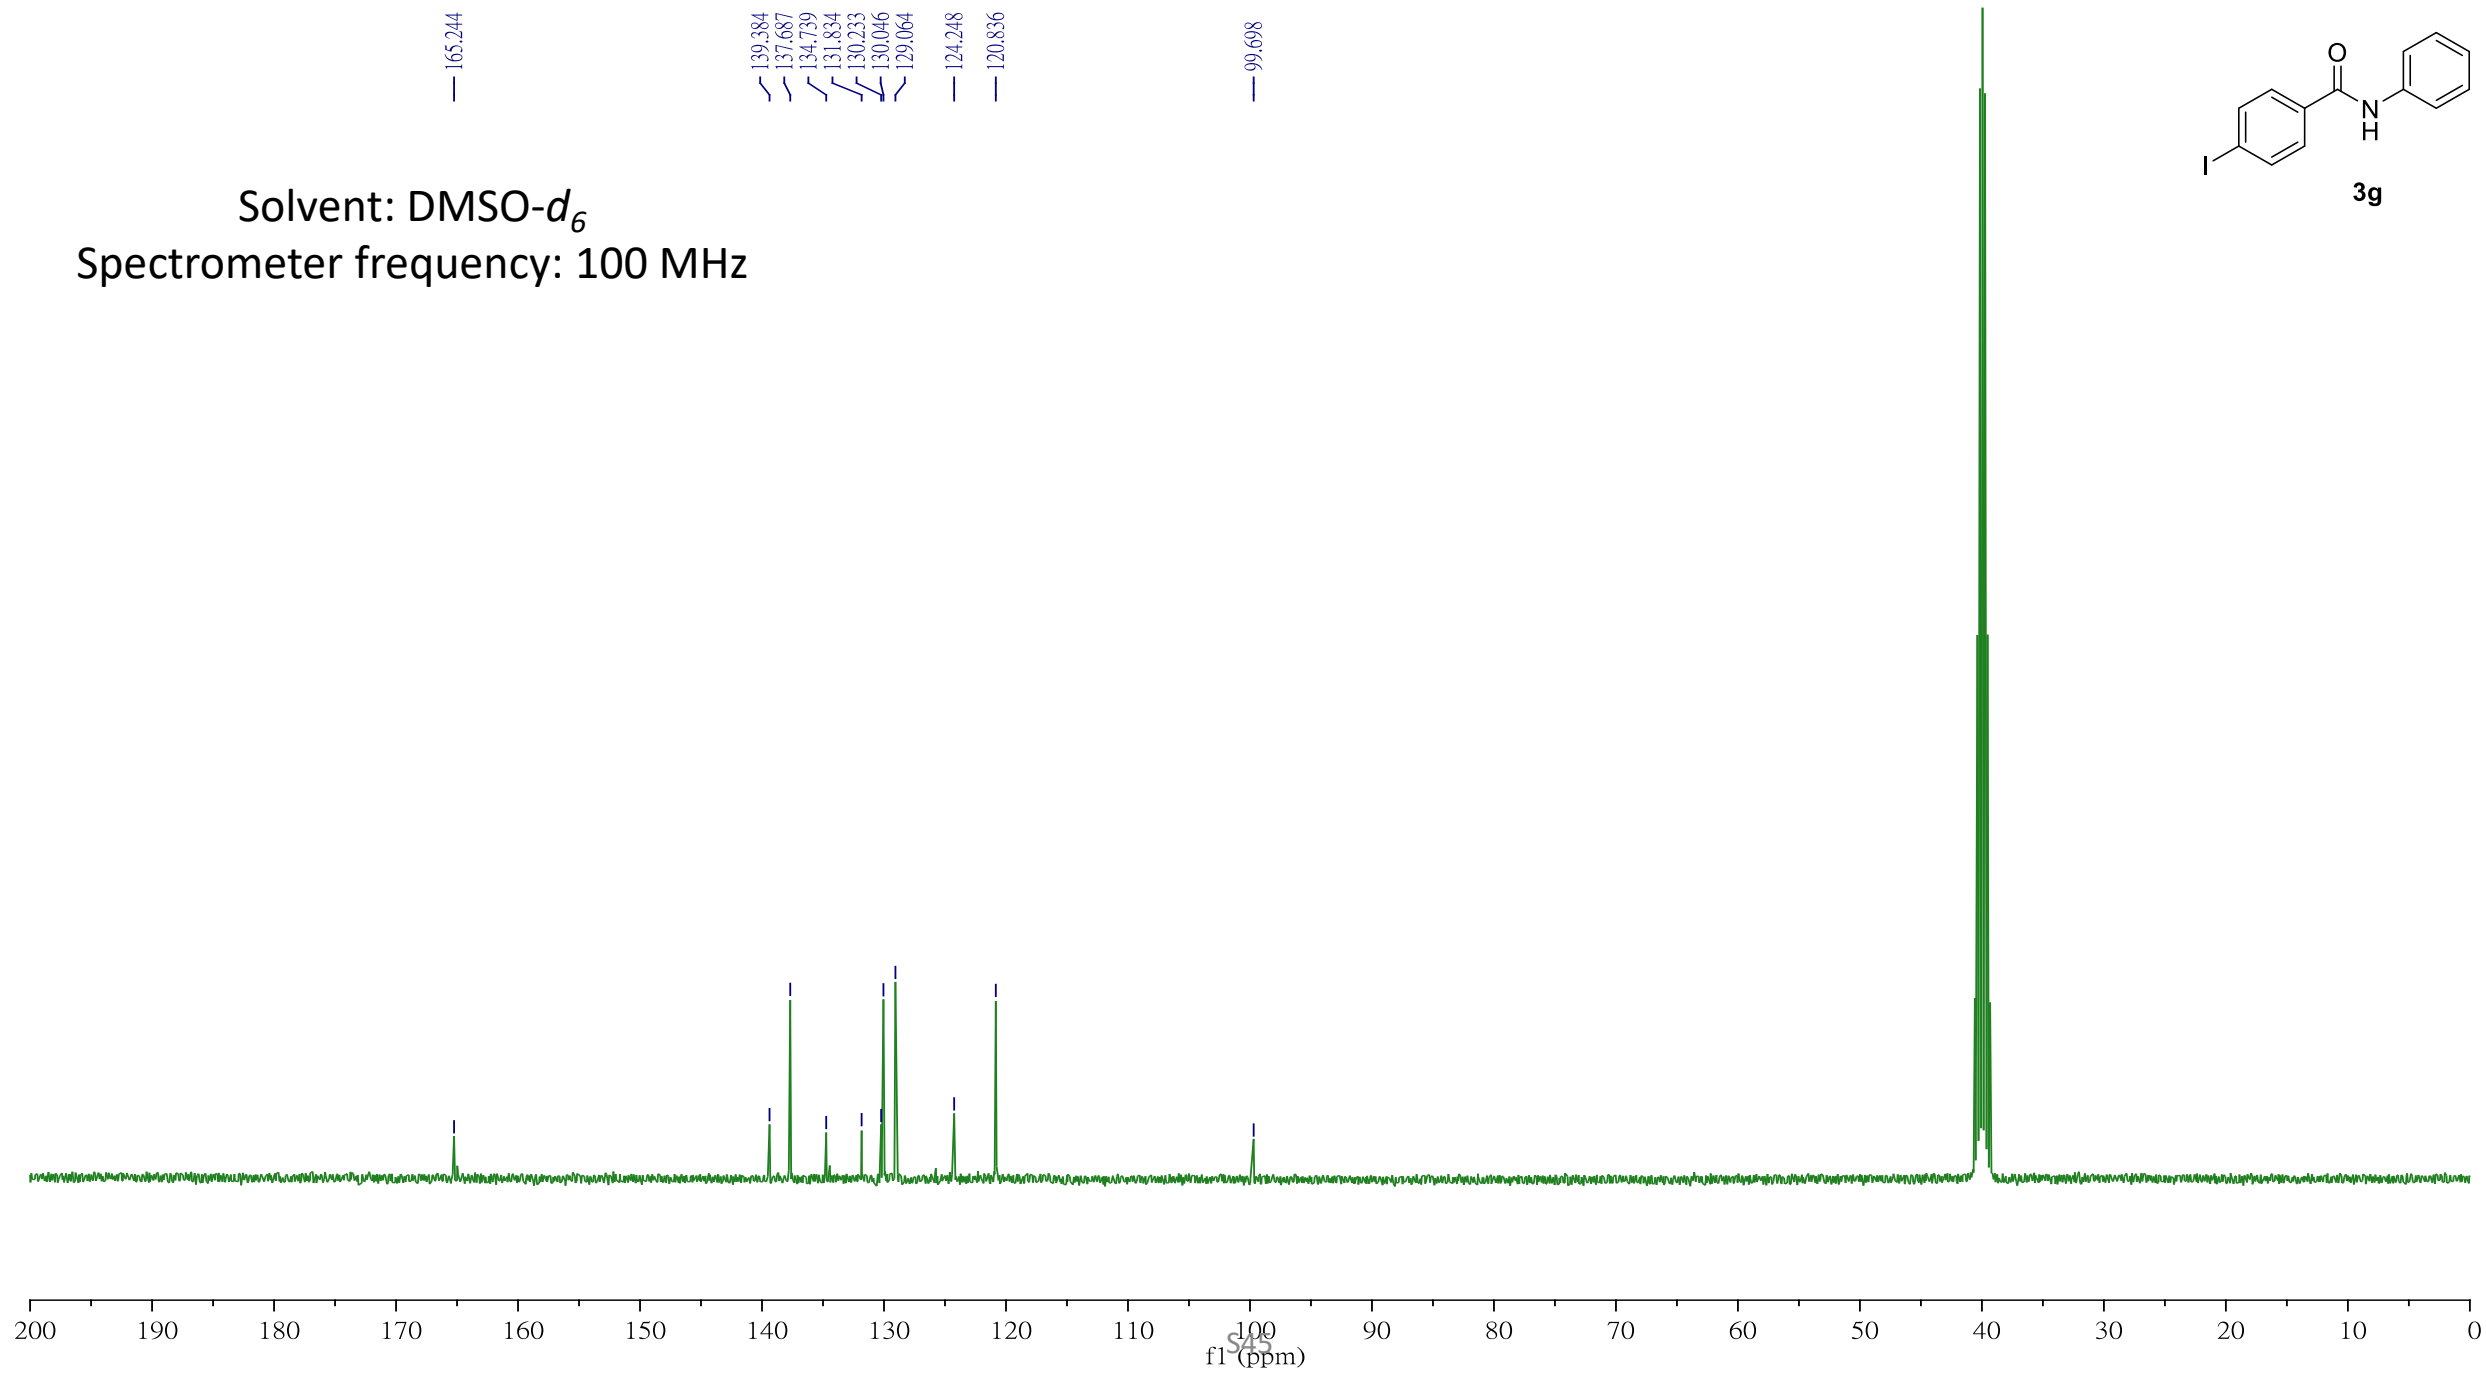

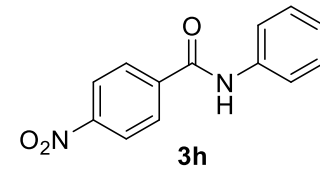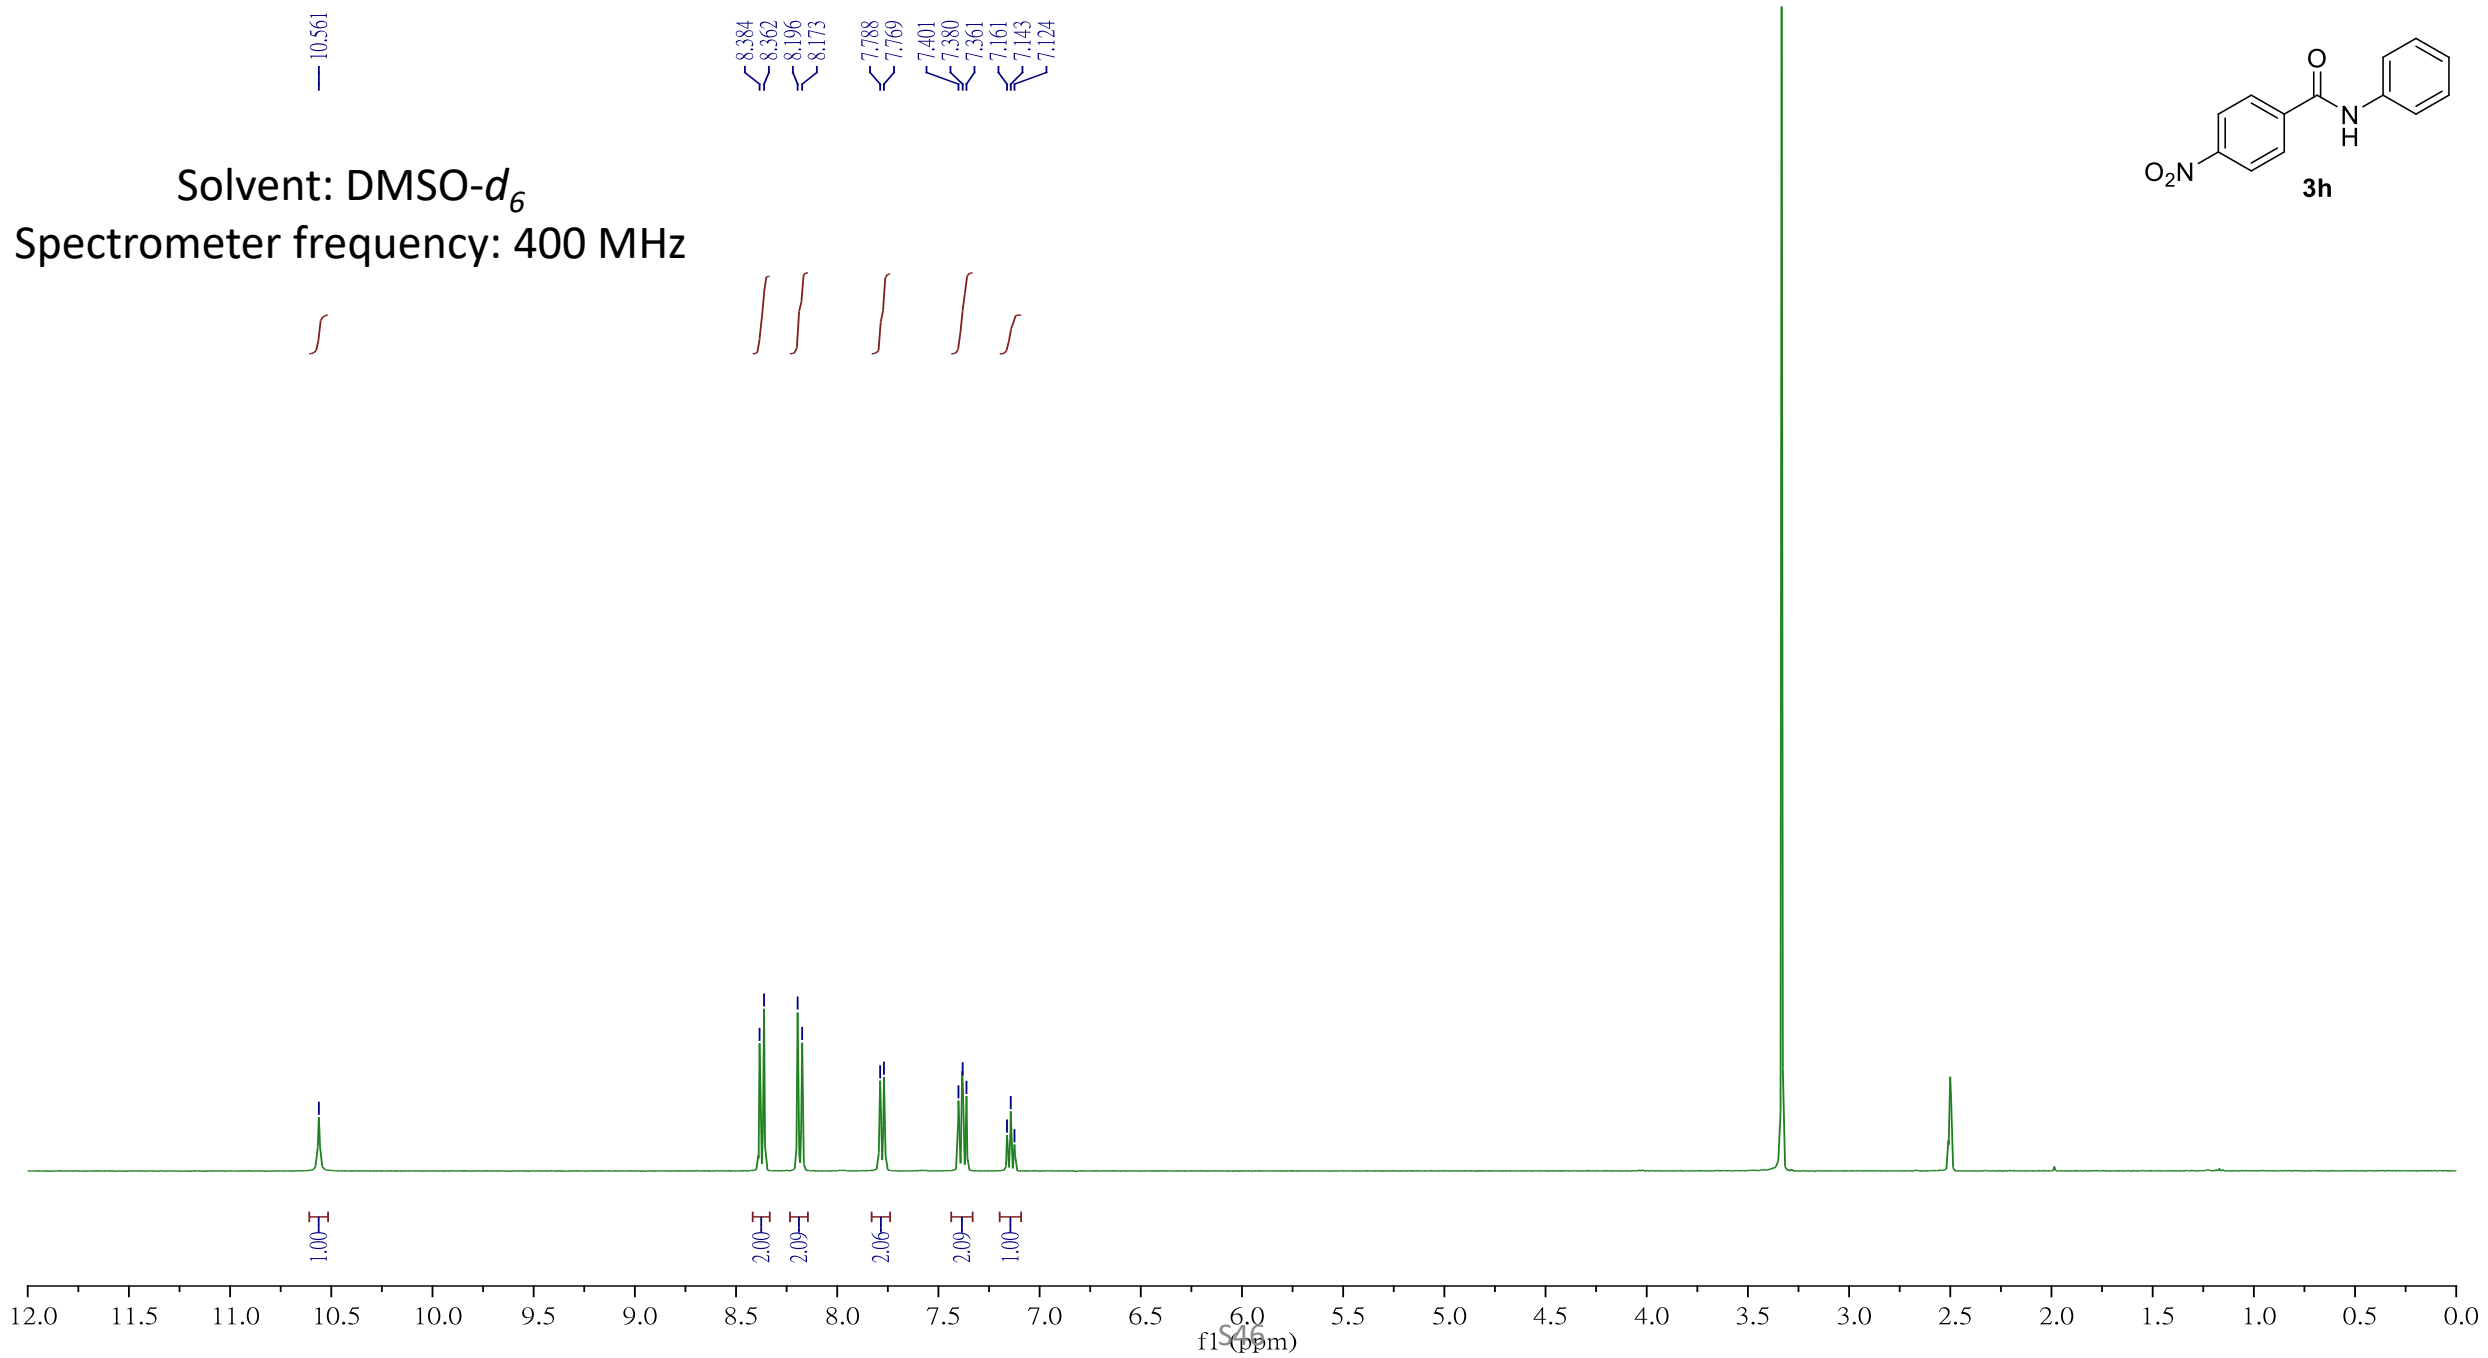

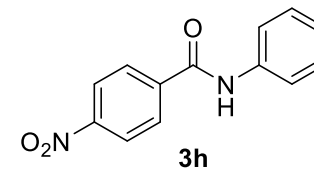

Solvent: DMSO- $d_6$   
Spectrometer frequency: 100 MHz

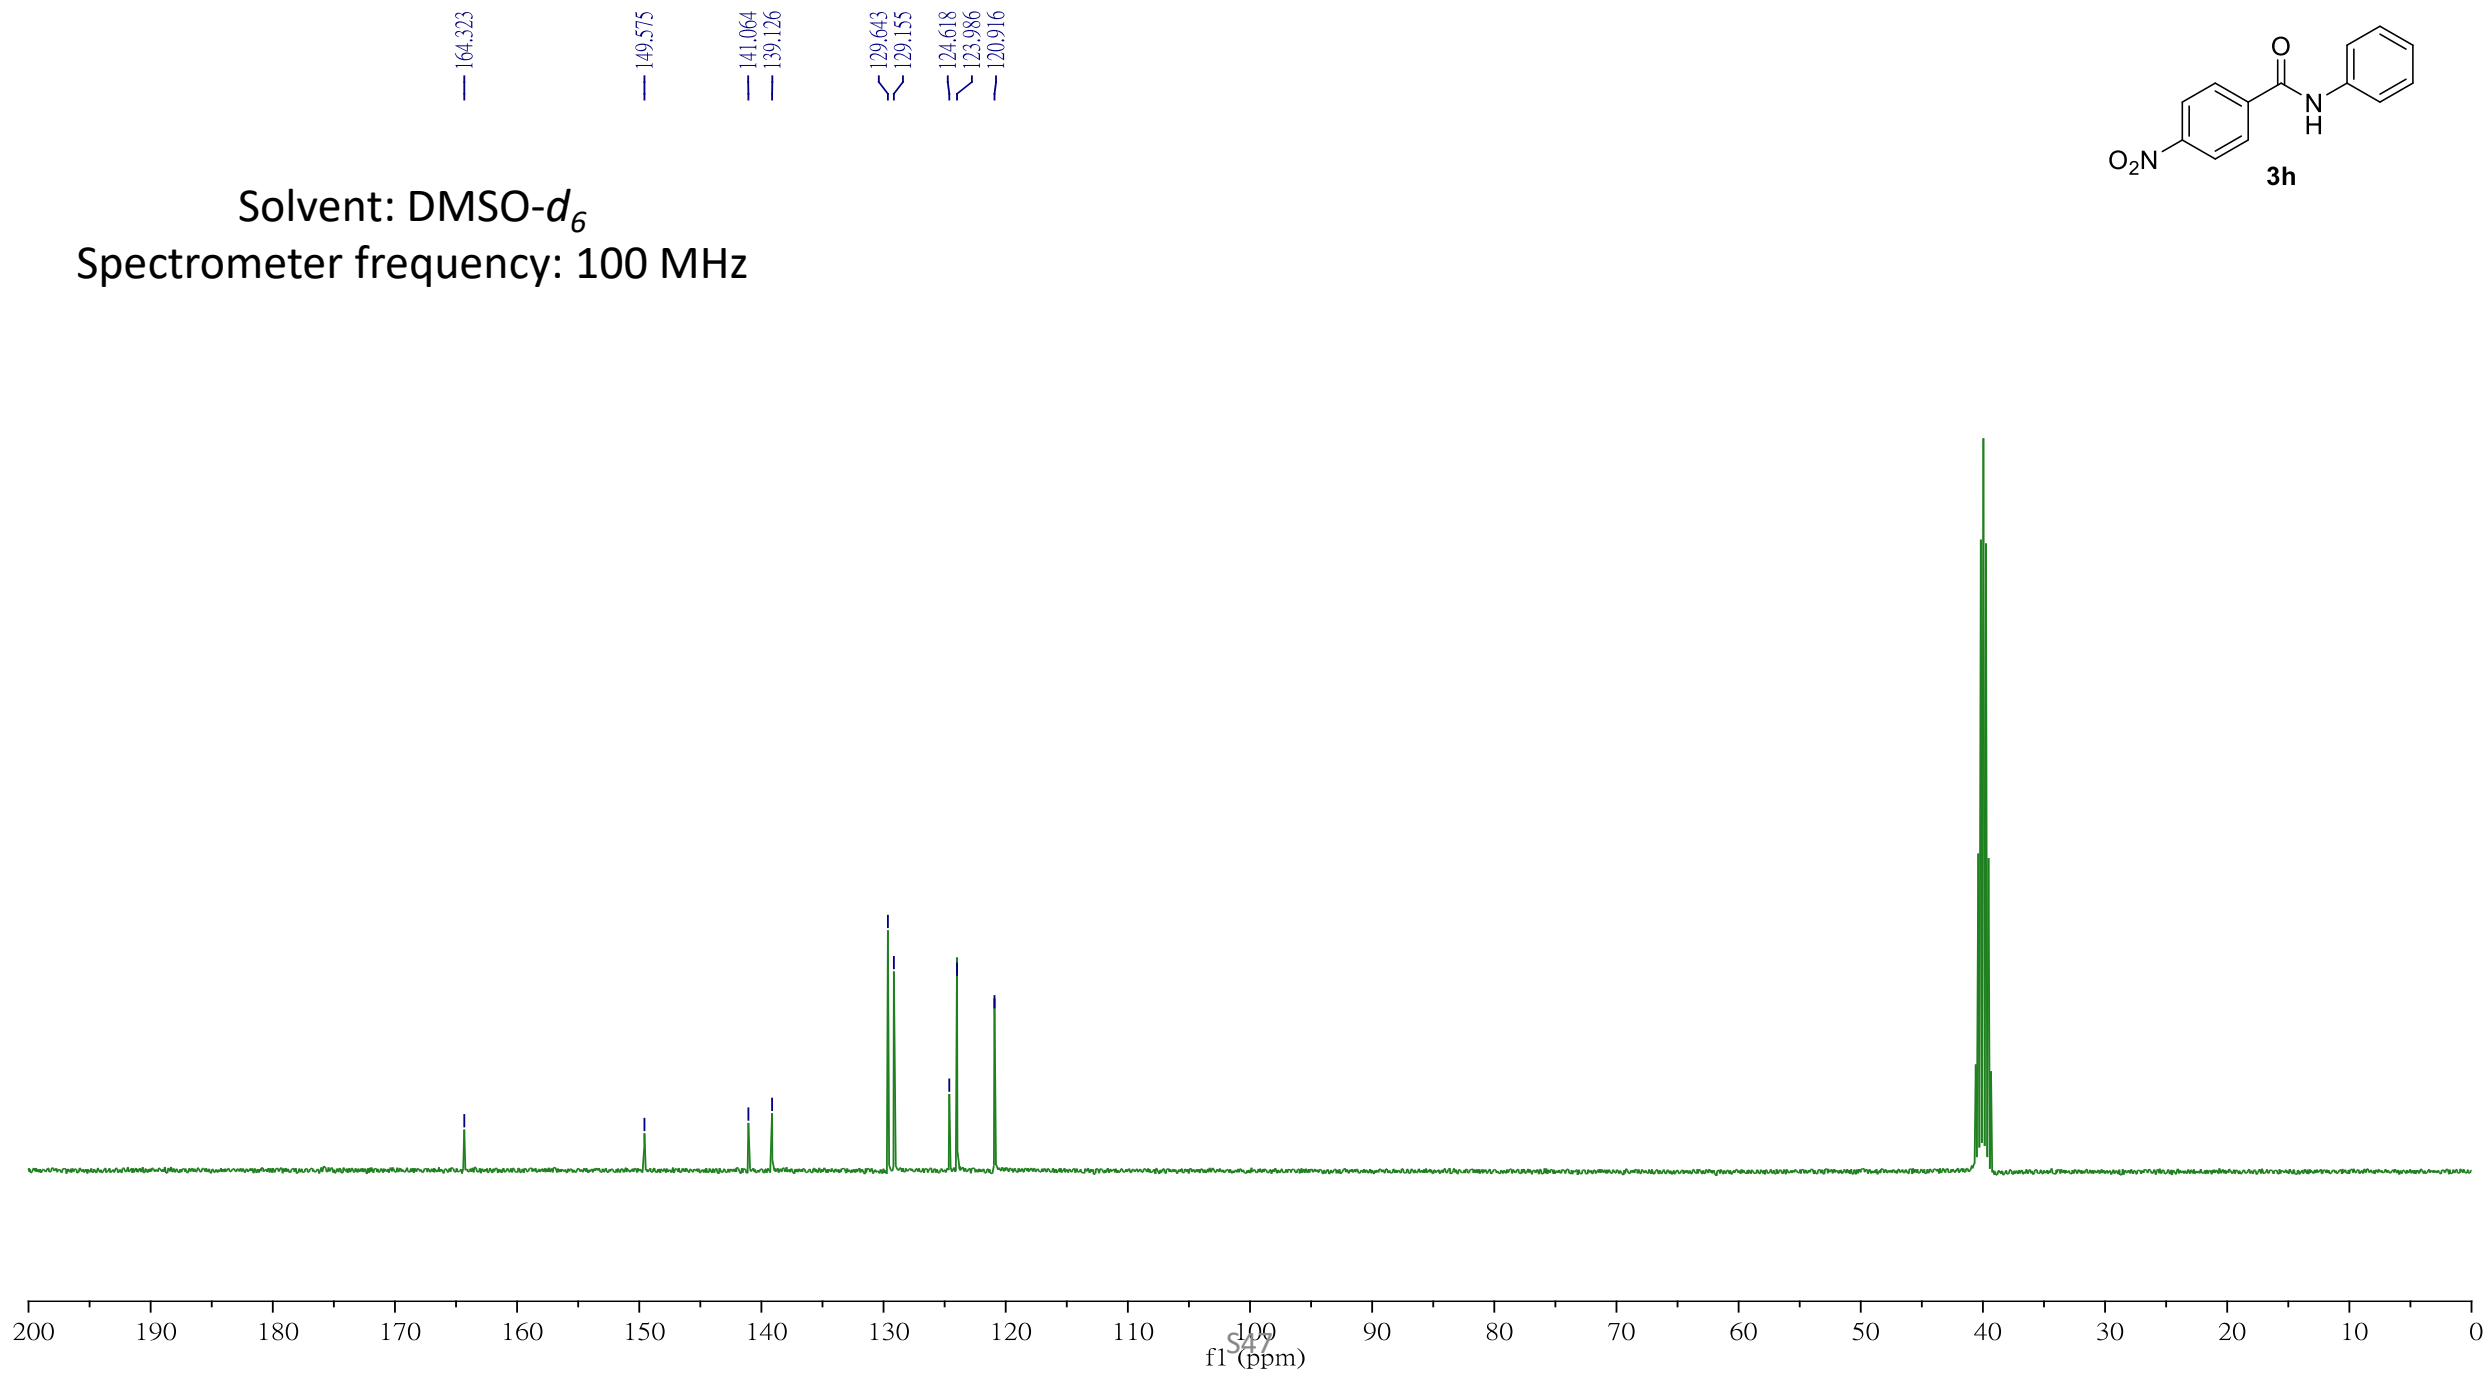



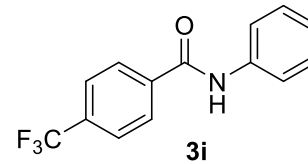

Solvent: DMSO-*d*<sub>6</sub>  
Spectrometer frequency: 400 MHz

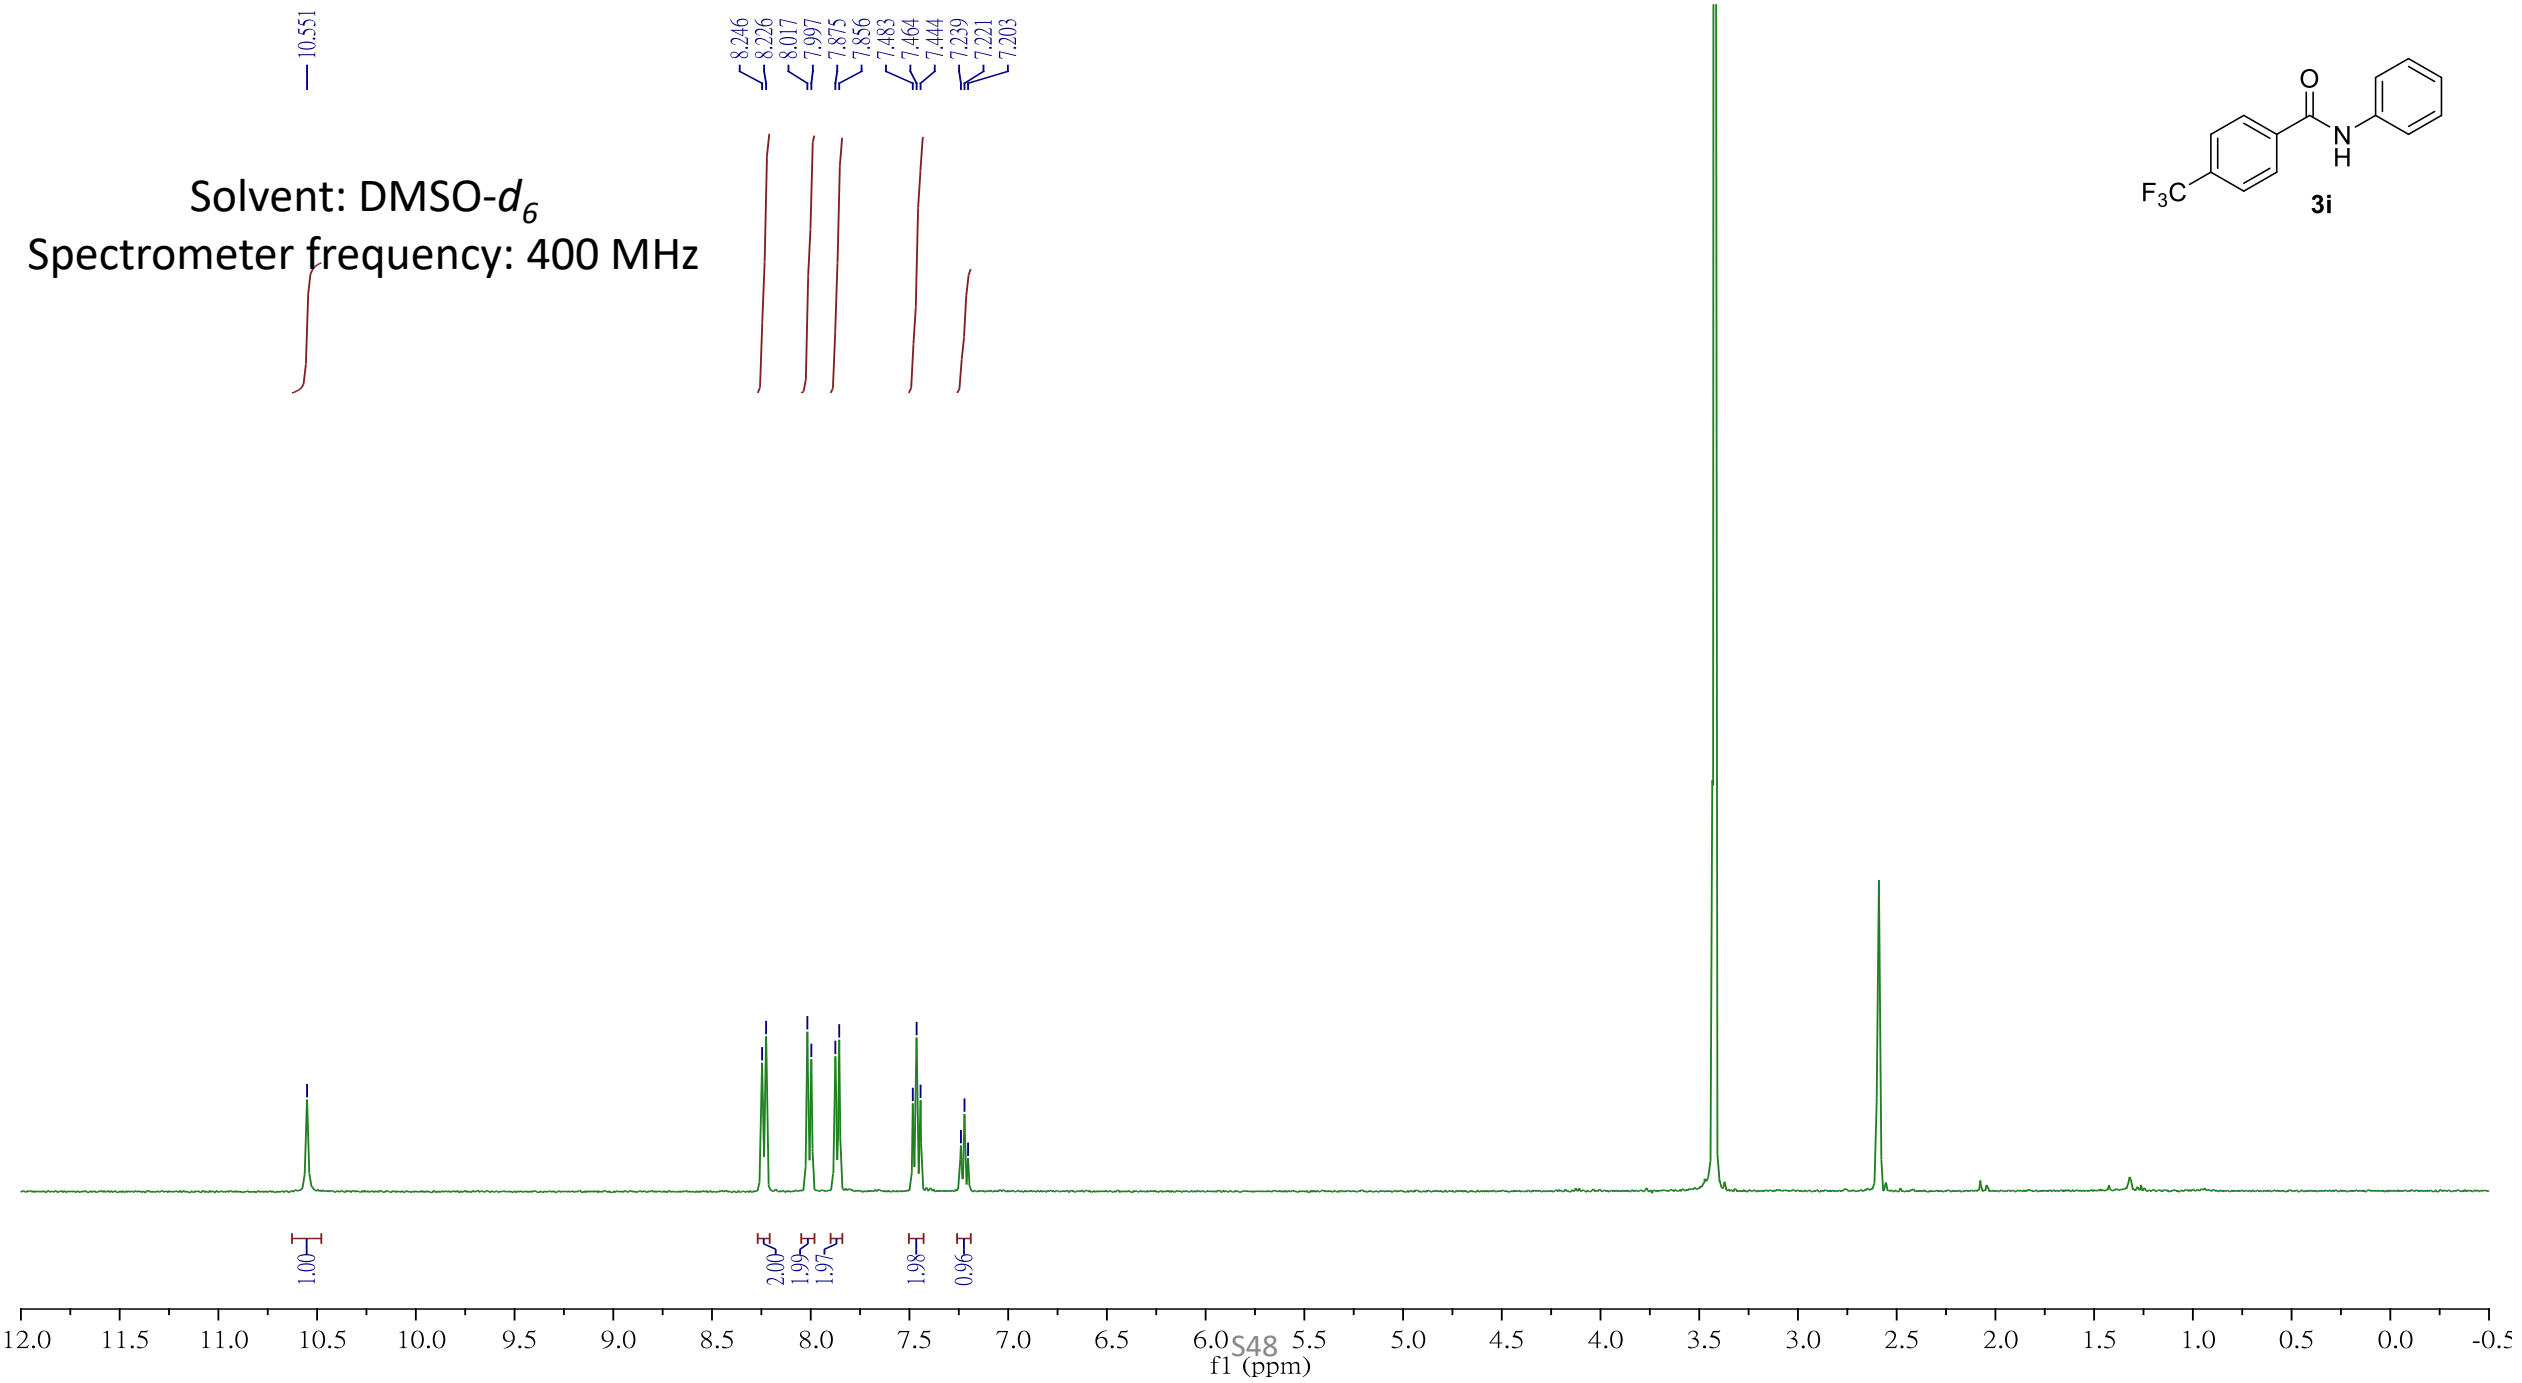

M0032-7  
NQ-DI-CF3 -CARBON

164.82

139.24  
131.93  
131.61  
129.12  
129.03  
125.93  
125.88  
125.85  
125.81  
125.77  
125.72  
124.54  
124.47  
123.01  
120.88

Solvent: DMSO-*d*<sub>6</sub>  
Spectrometer frequency: 100 MHz

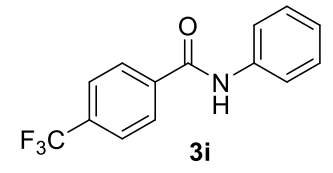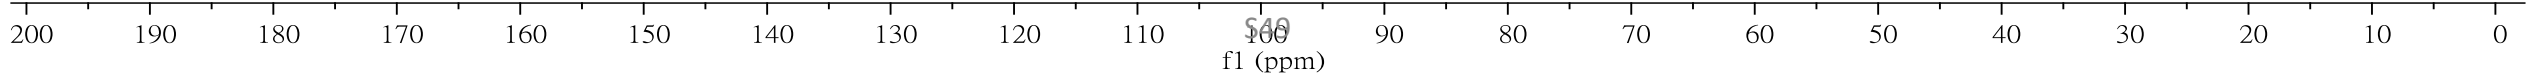

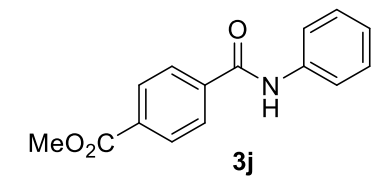

Solvent: DMSO-*d*<sub>6</sub>  
Spectrometer frequency: 400 MHz

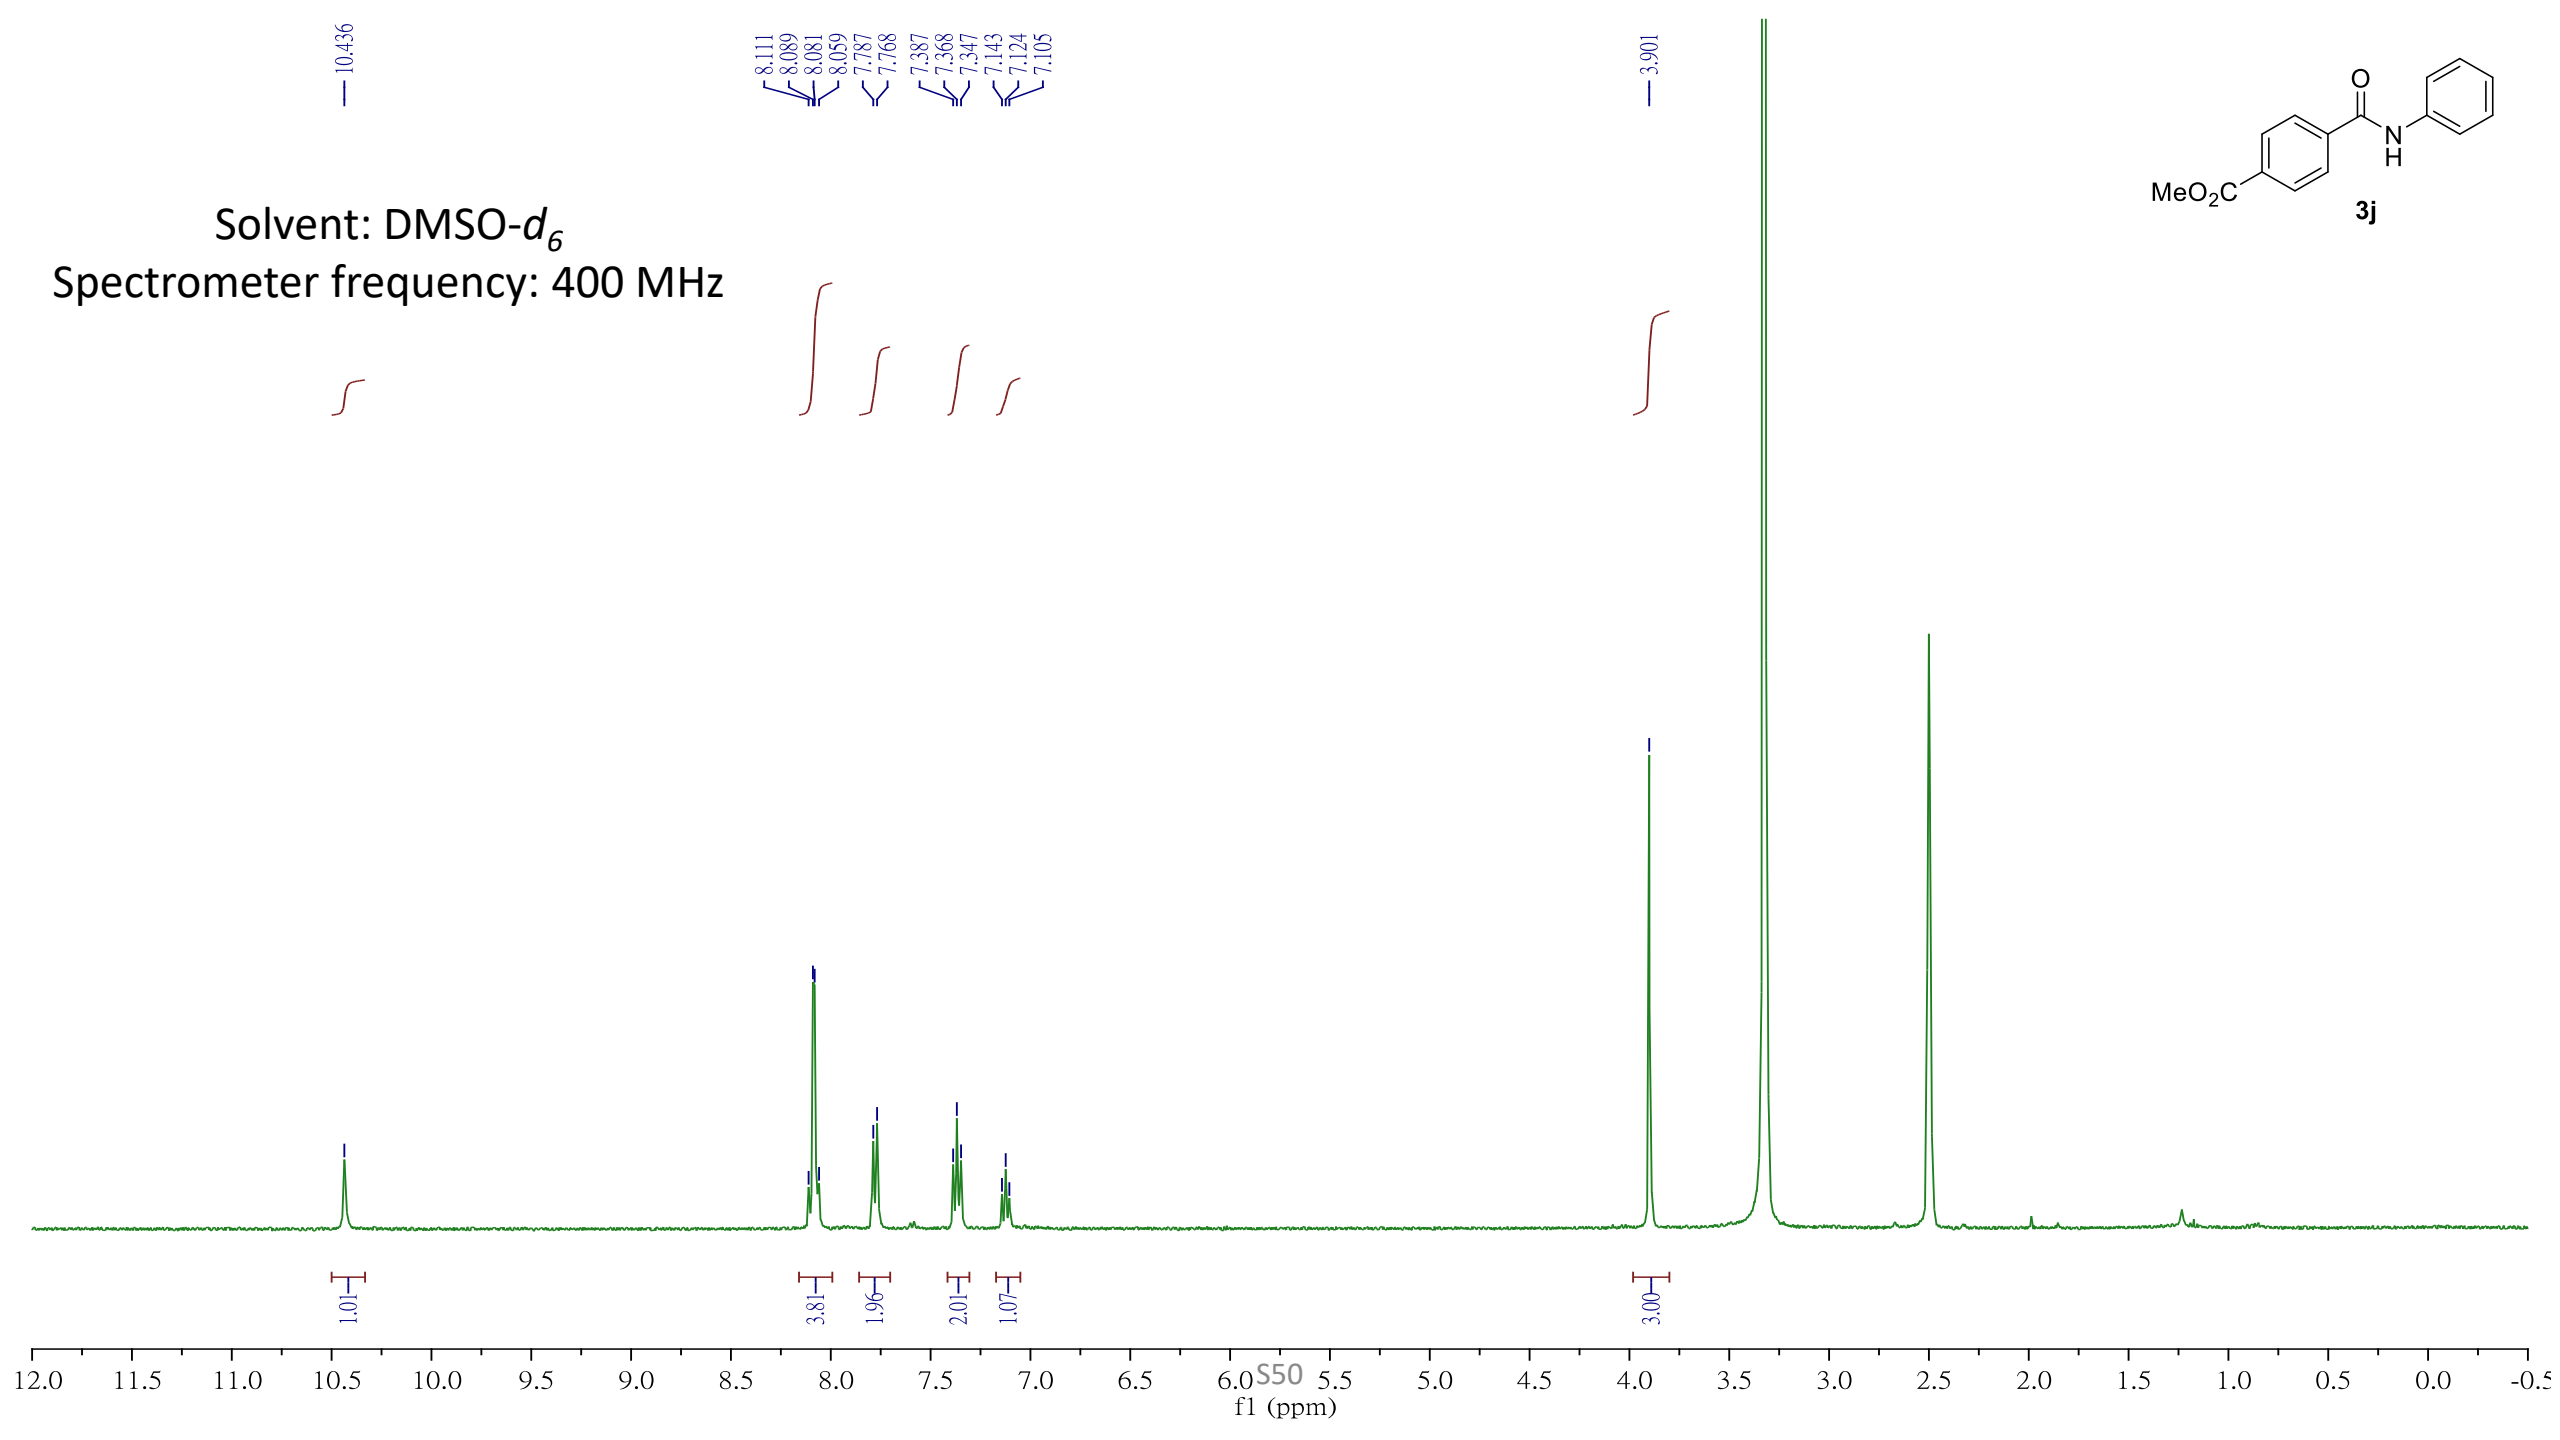

Solvent: DMSO- $d_6$   
Spectrometer frequency: 100 MHz

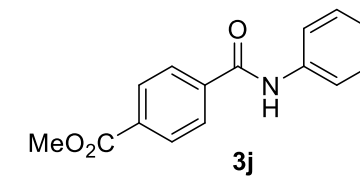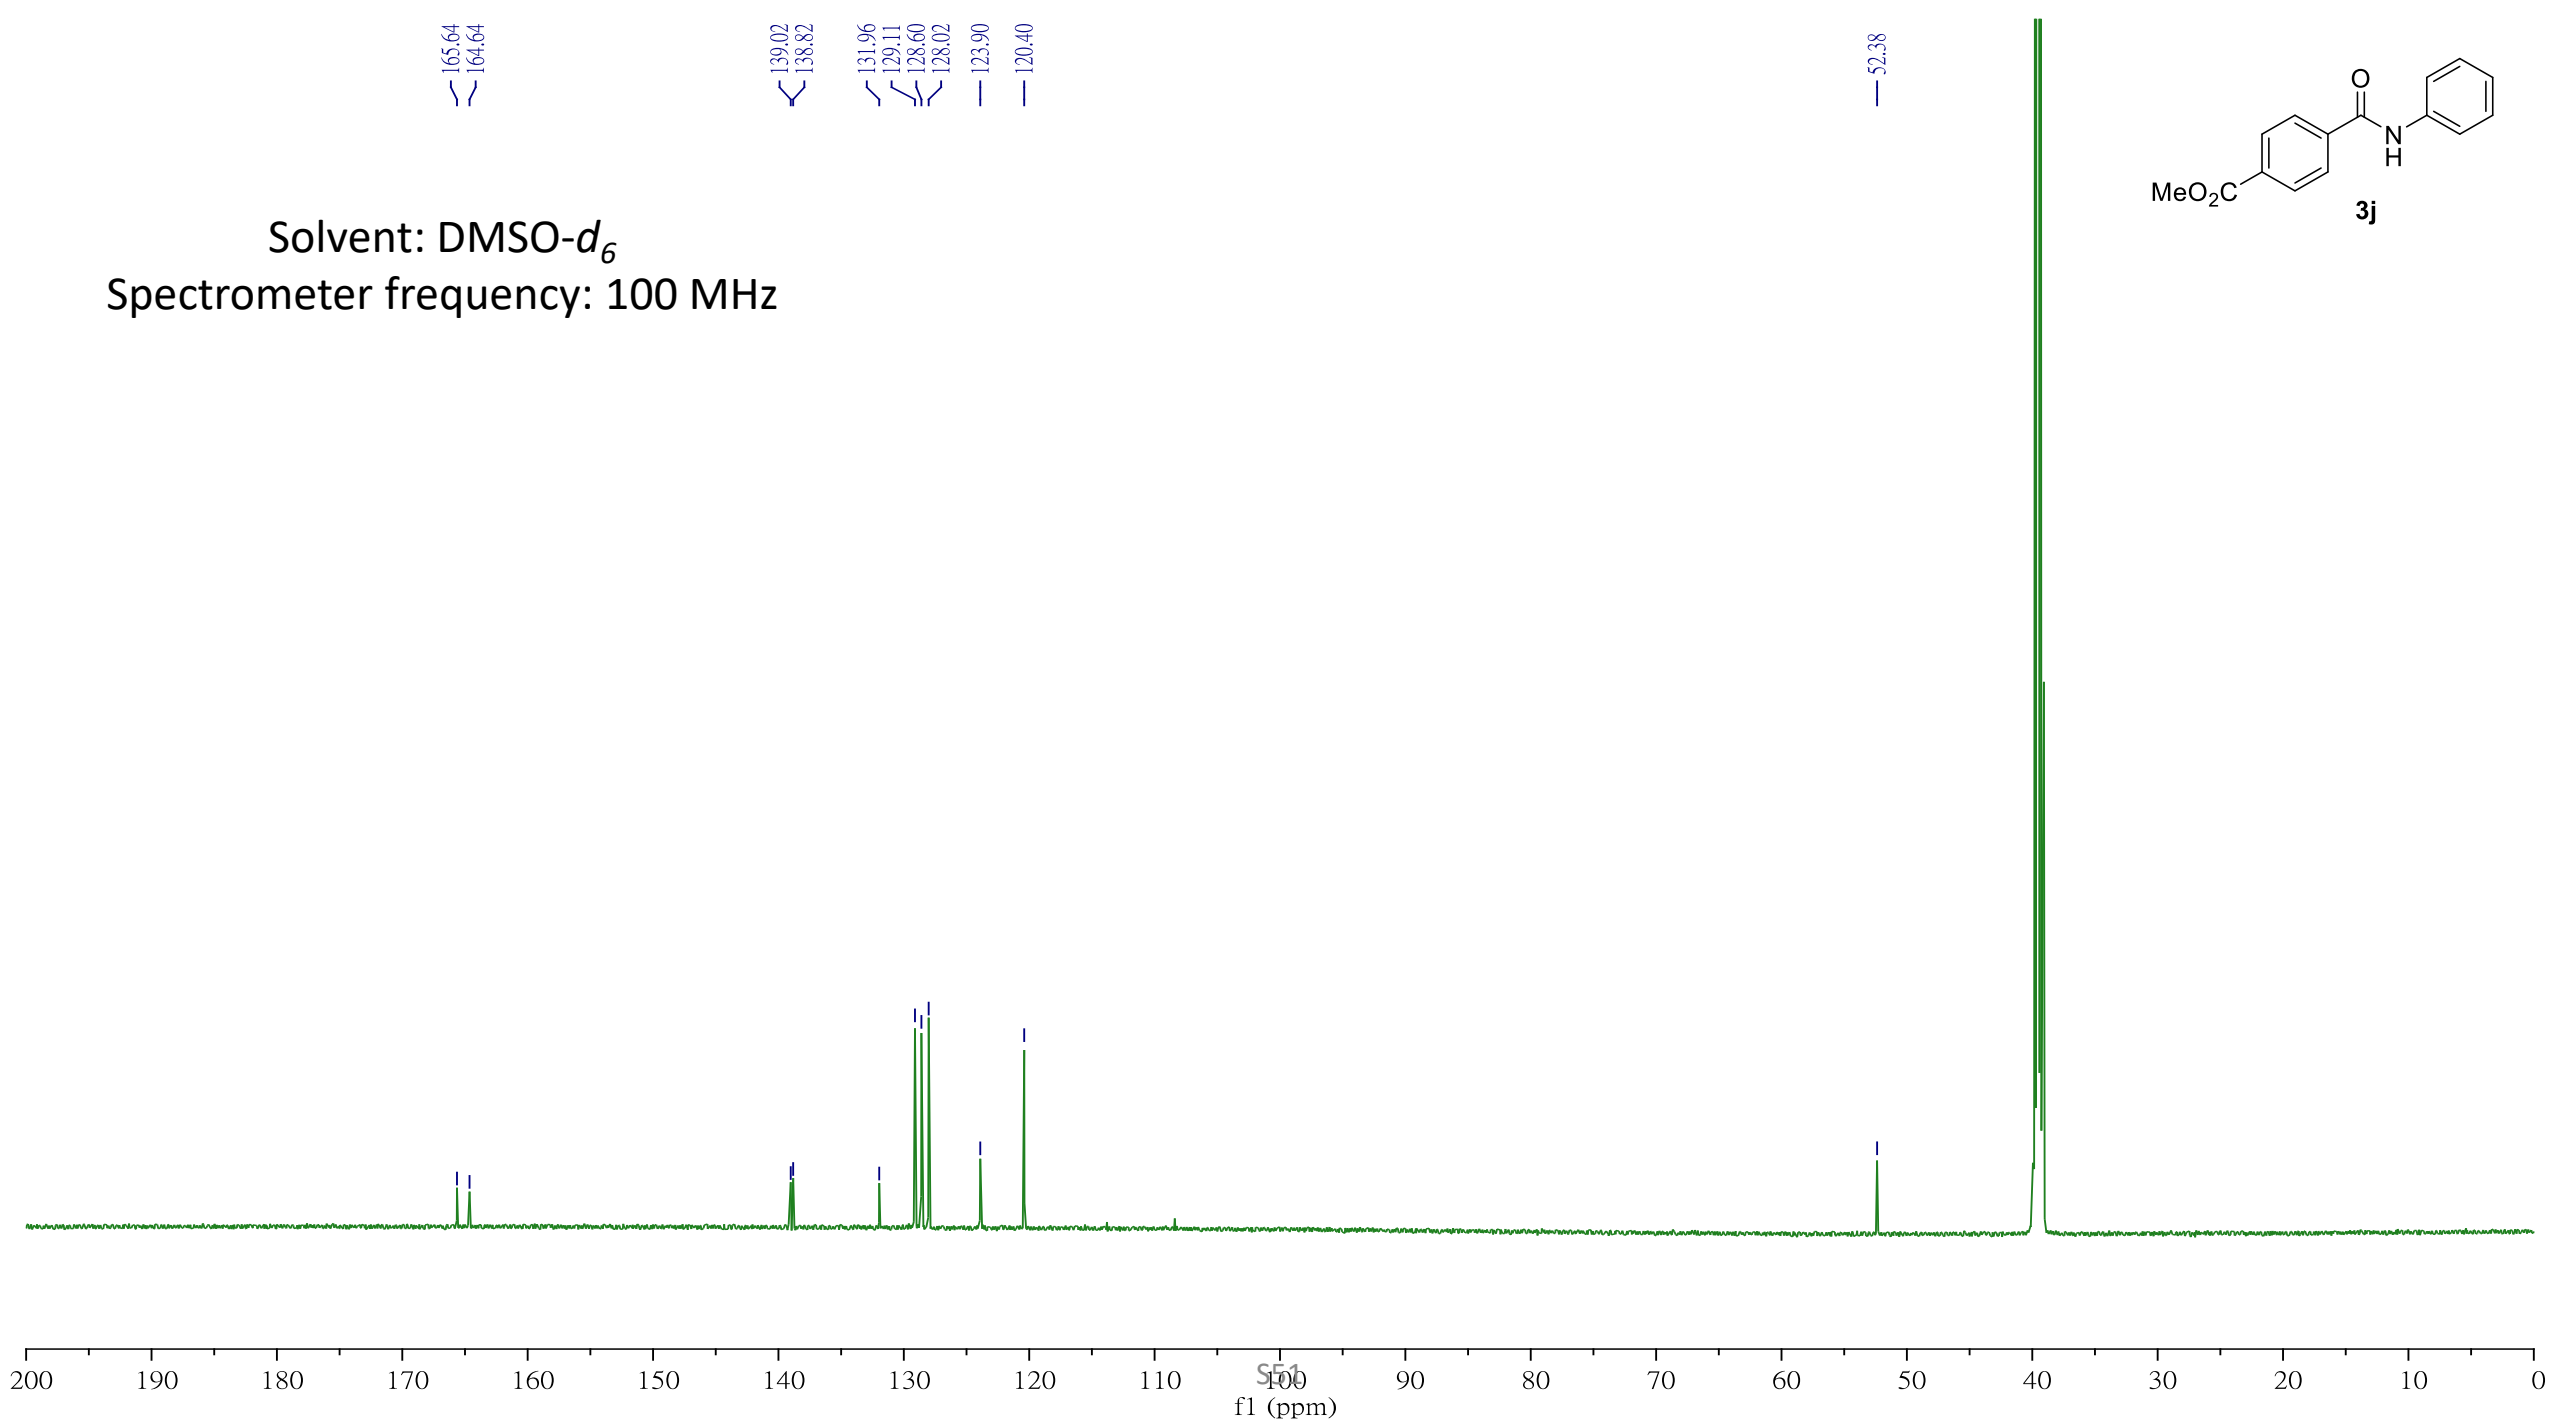

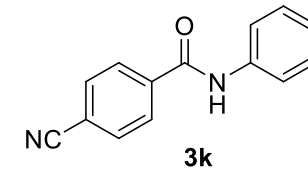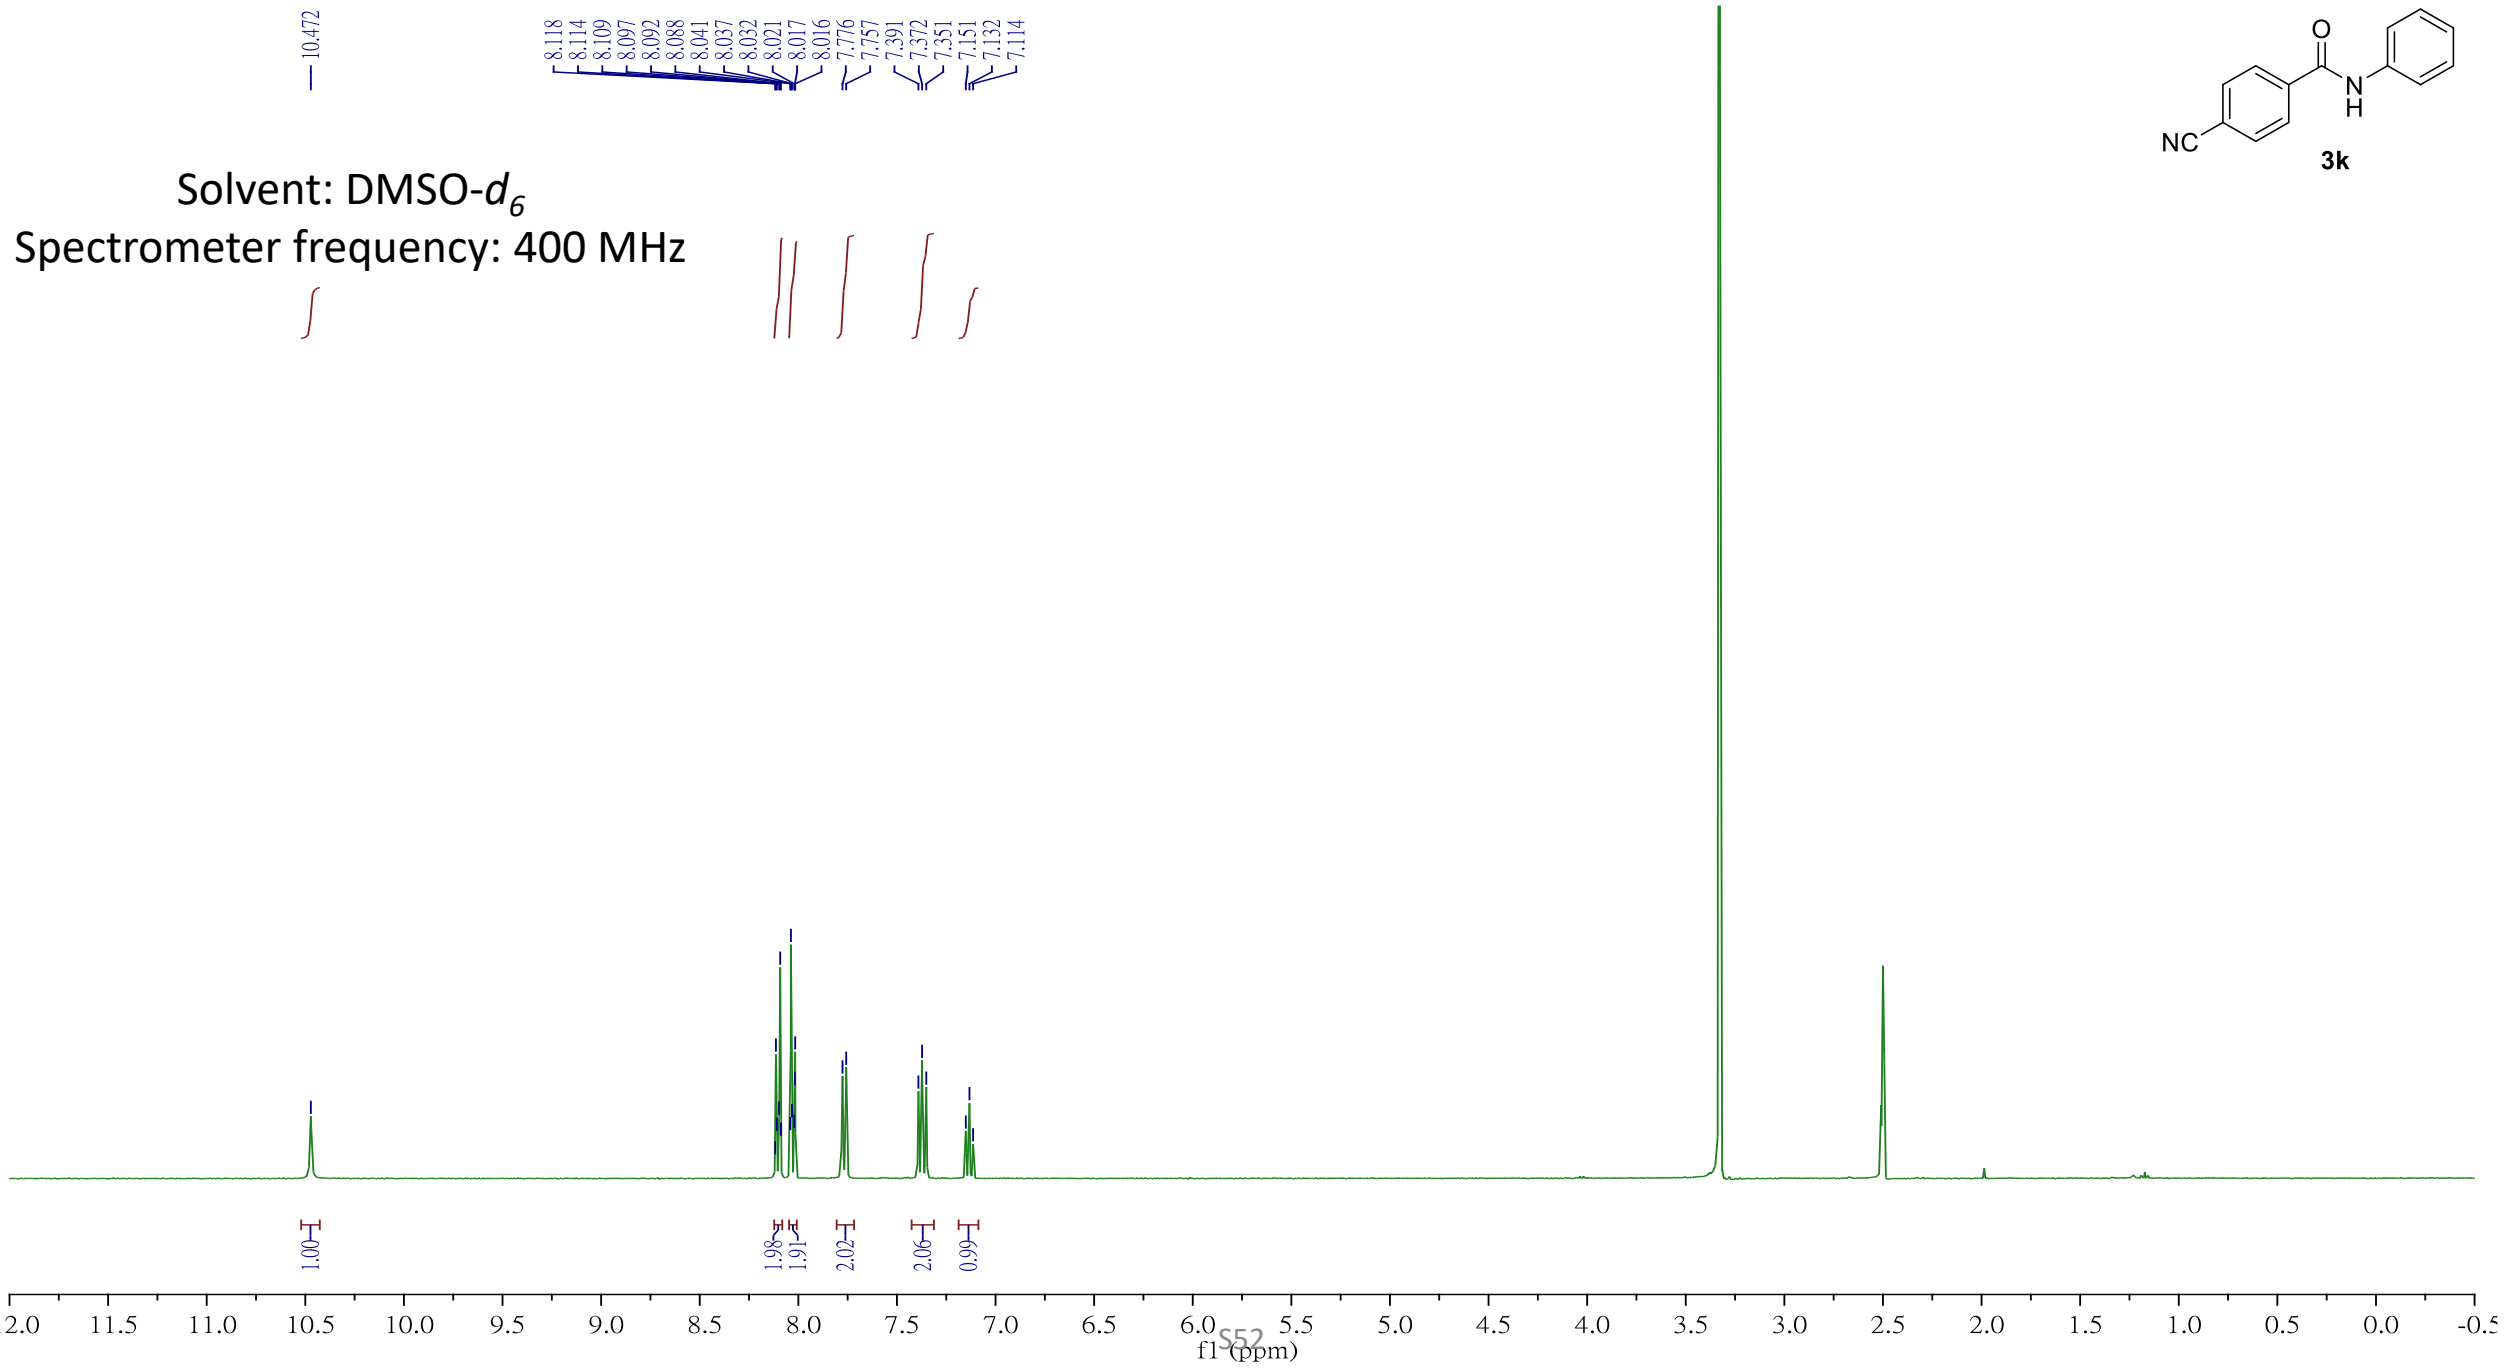

Solvent: DMSO- $d_6$   
Spectrometer frequency: 100 MHz

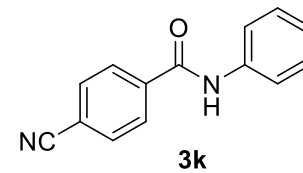

164.142  
138.982 138.724  
132.463 128.693 128.521  
124.103 120.439 118.318  
113.819

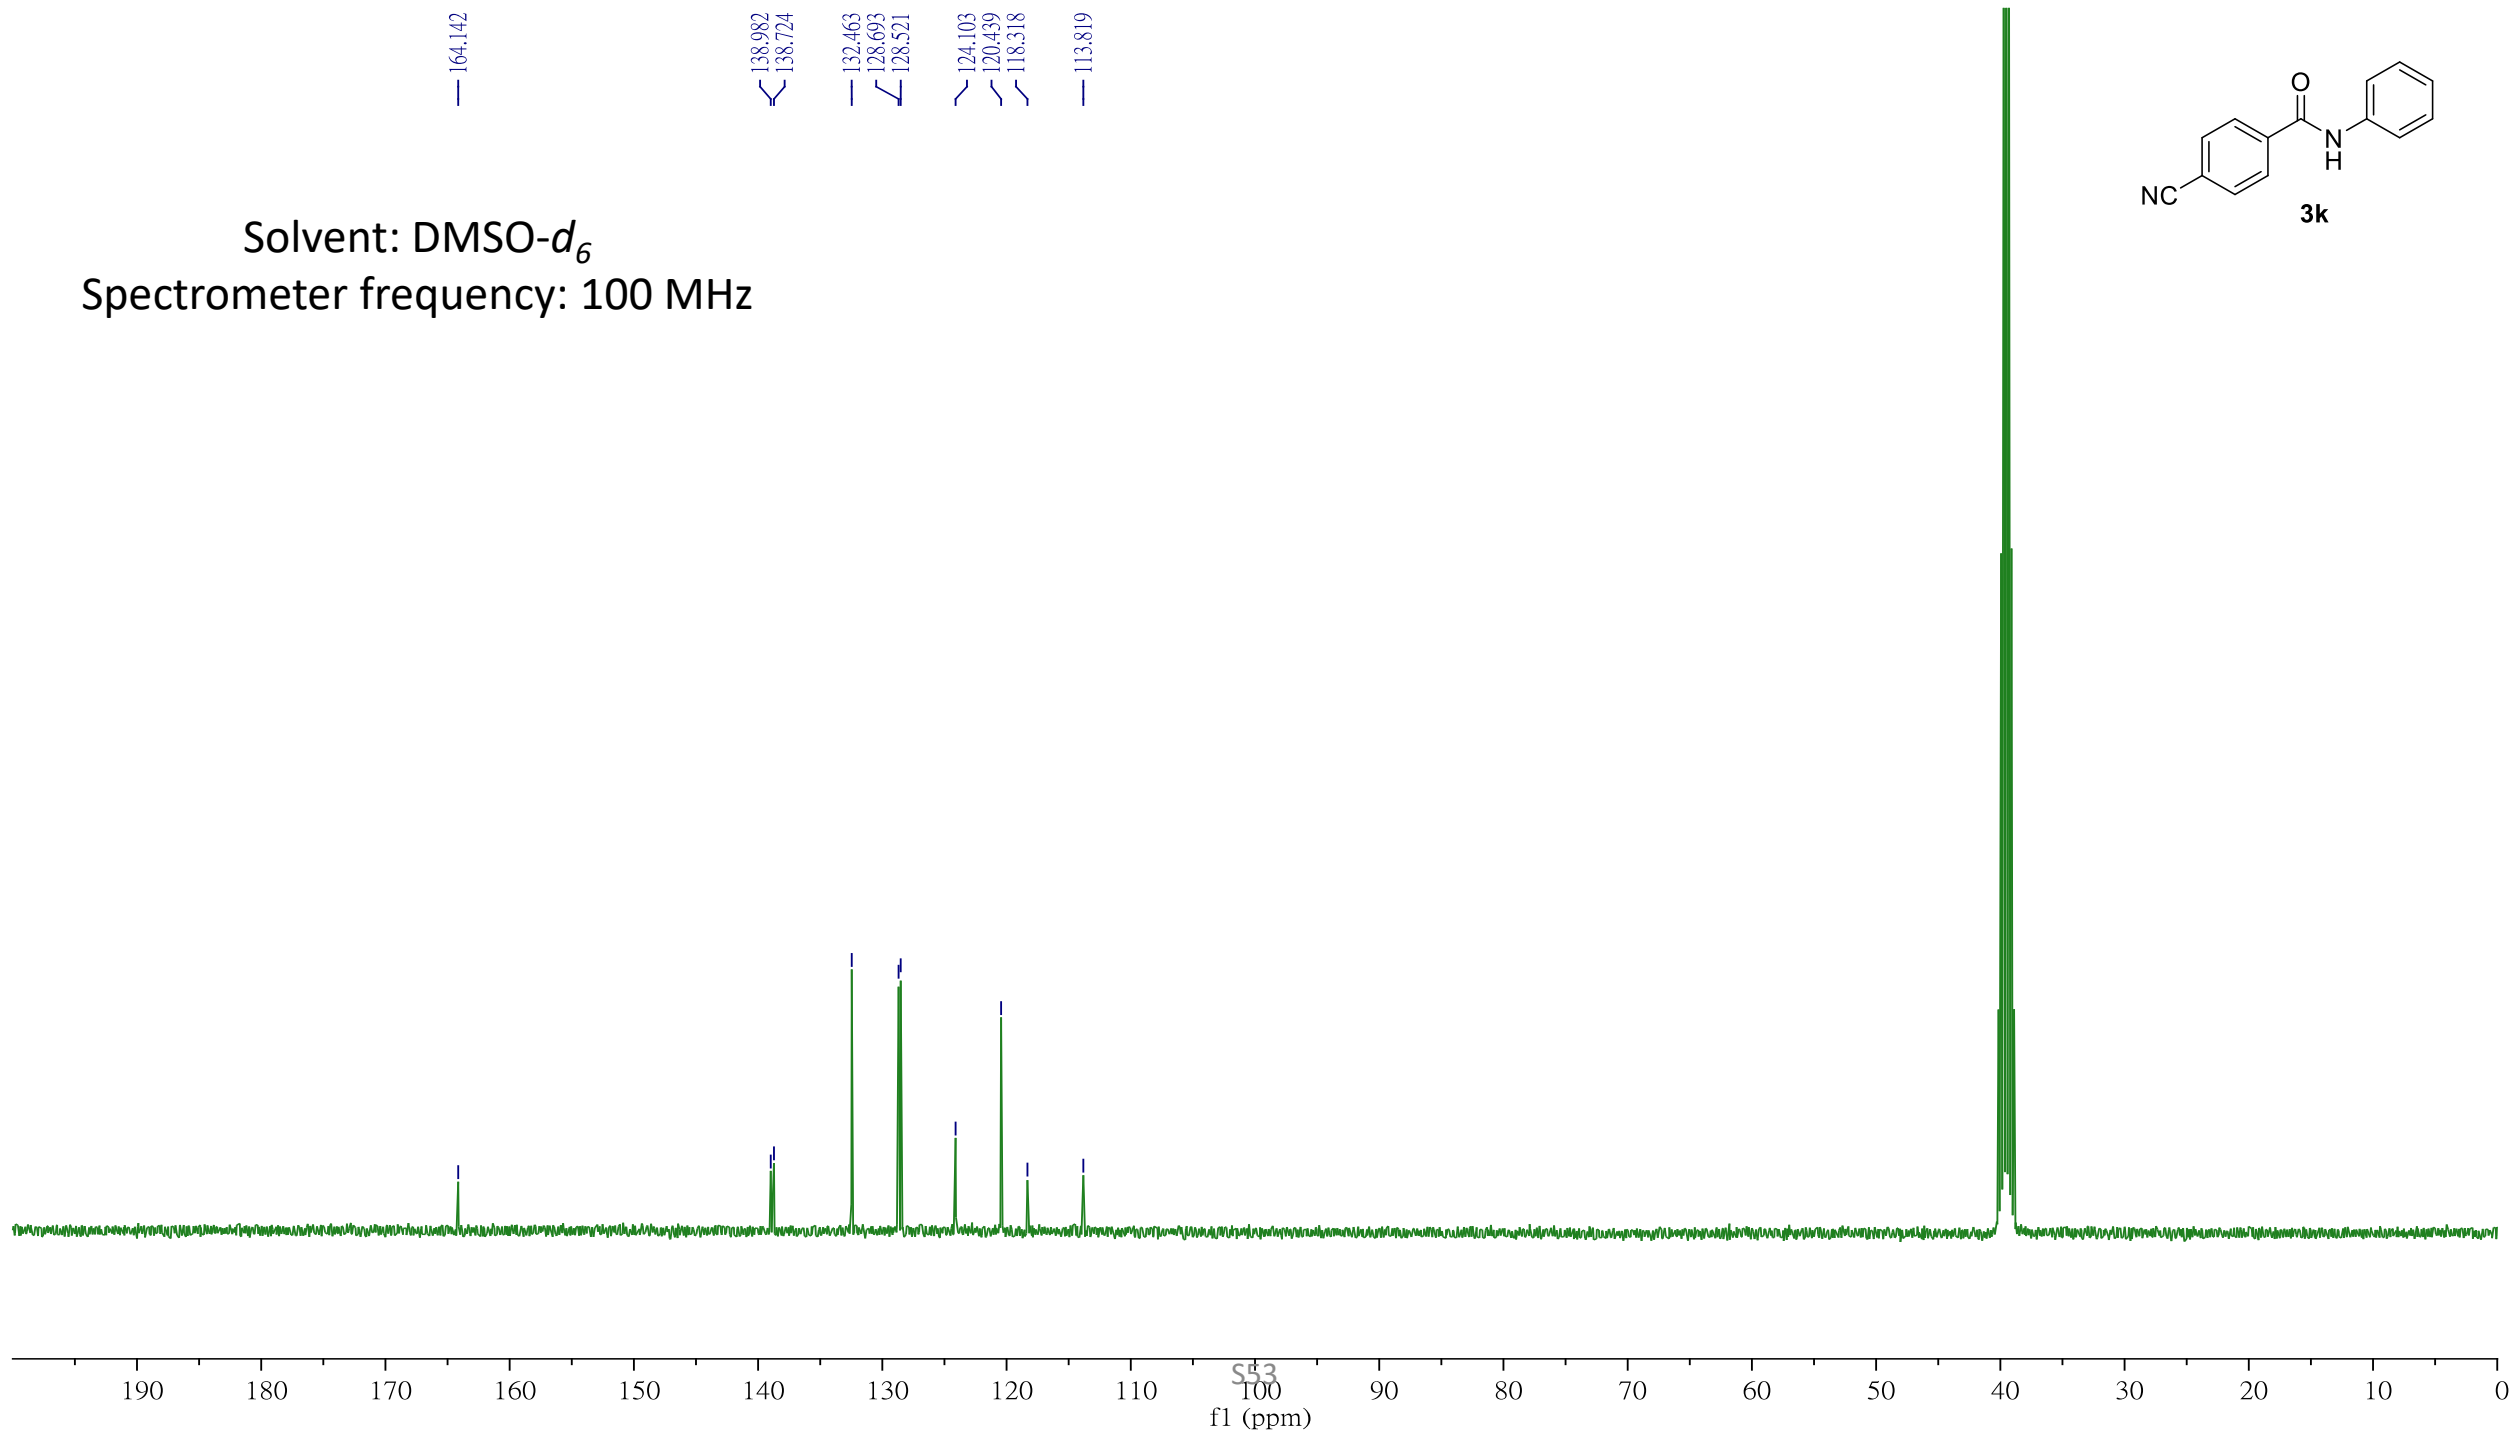

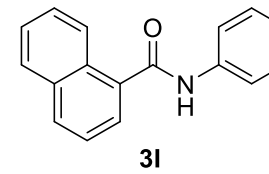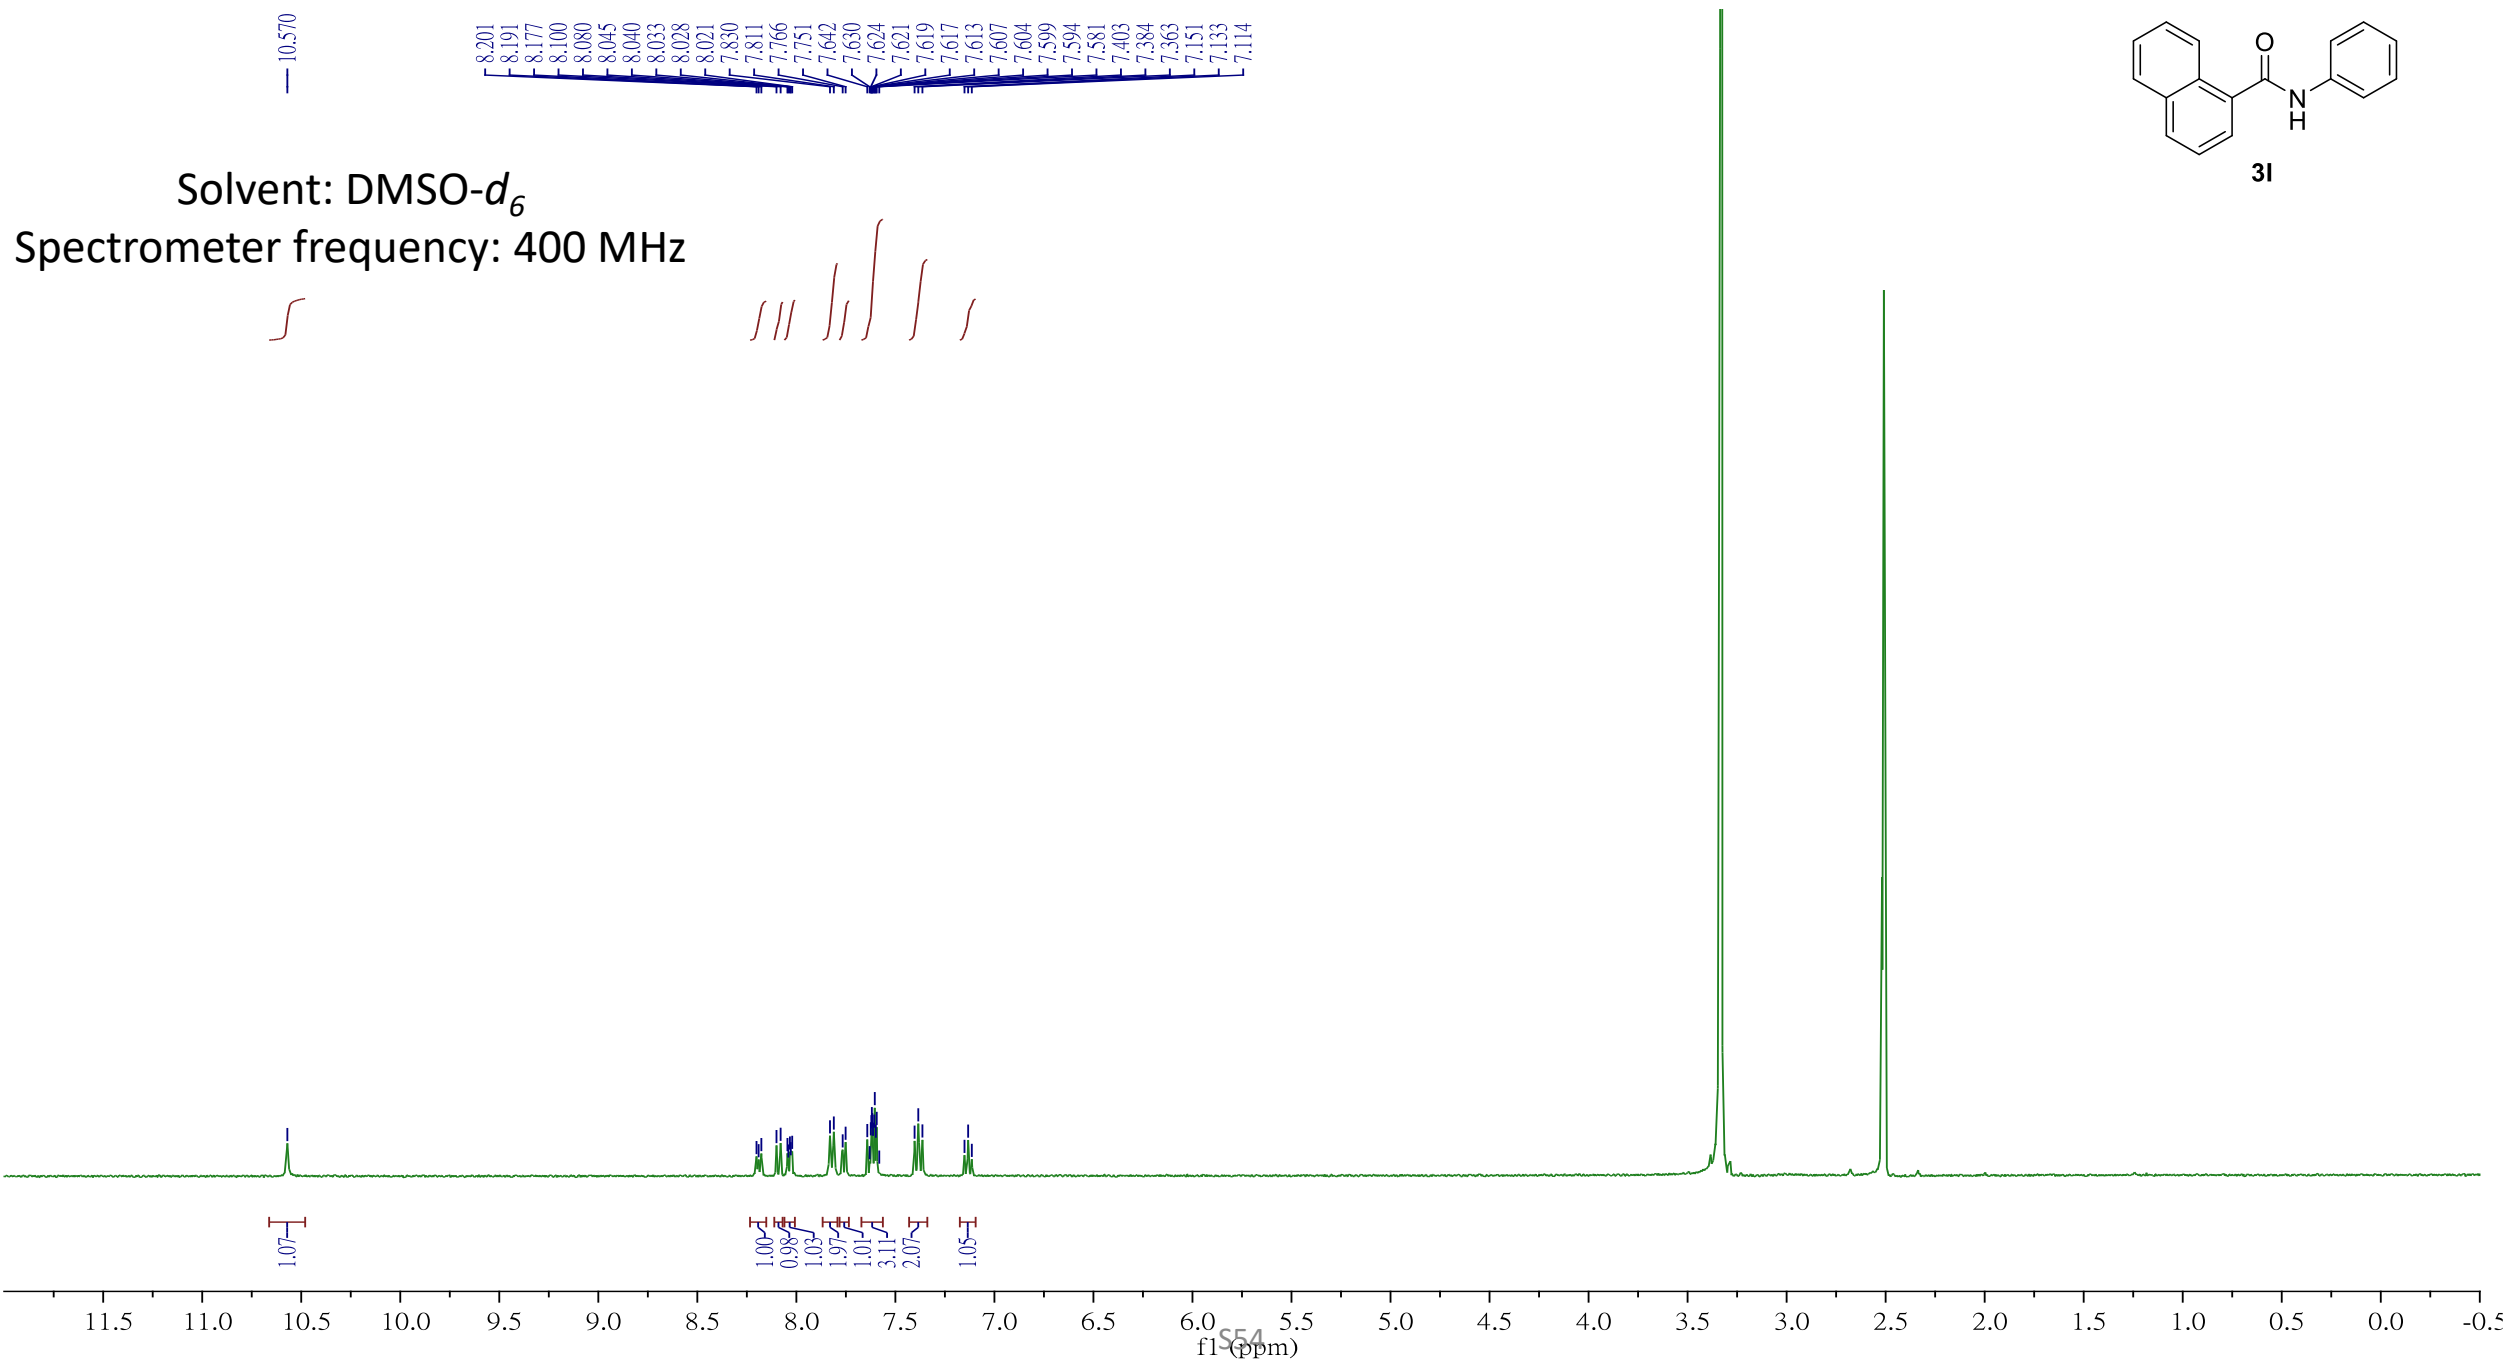

139.26  
134.76  
133.10  
130.01  
129.60  
128.66  
128.27  
126.93  
126.30  
125.36  
125.05  
124.99  
123.63  
119.77

Solvent: DMSO-*d*<sub>6</sub>  
Spectrometer frequency: 100 MHz

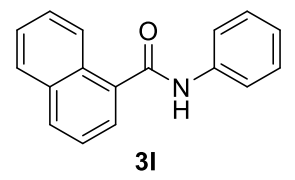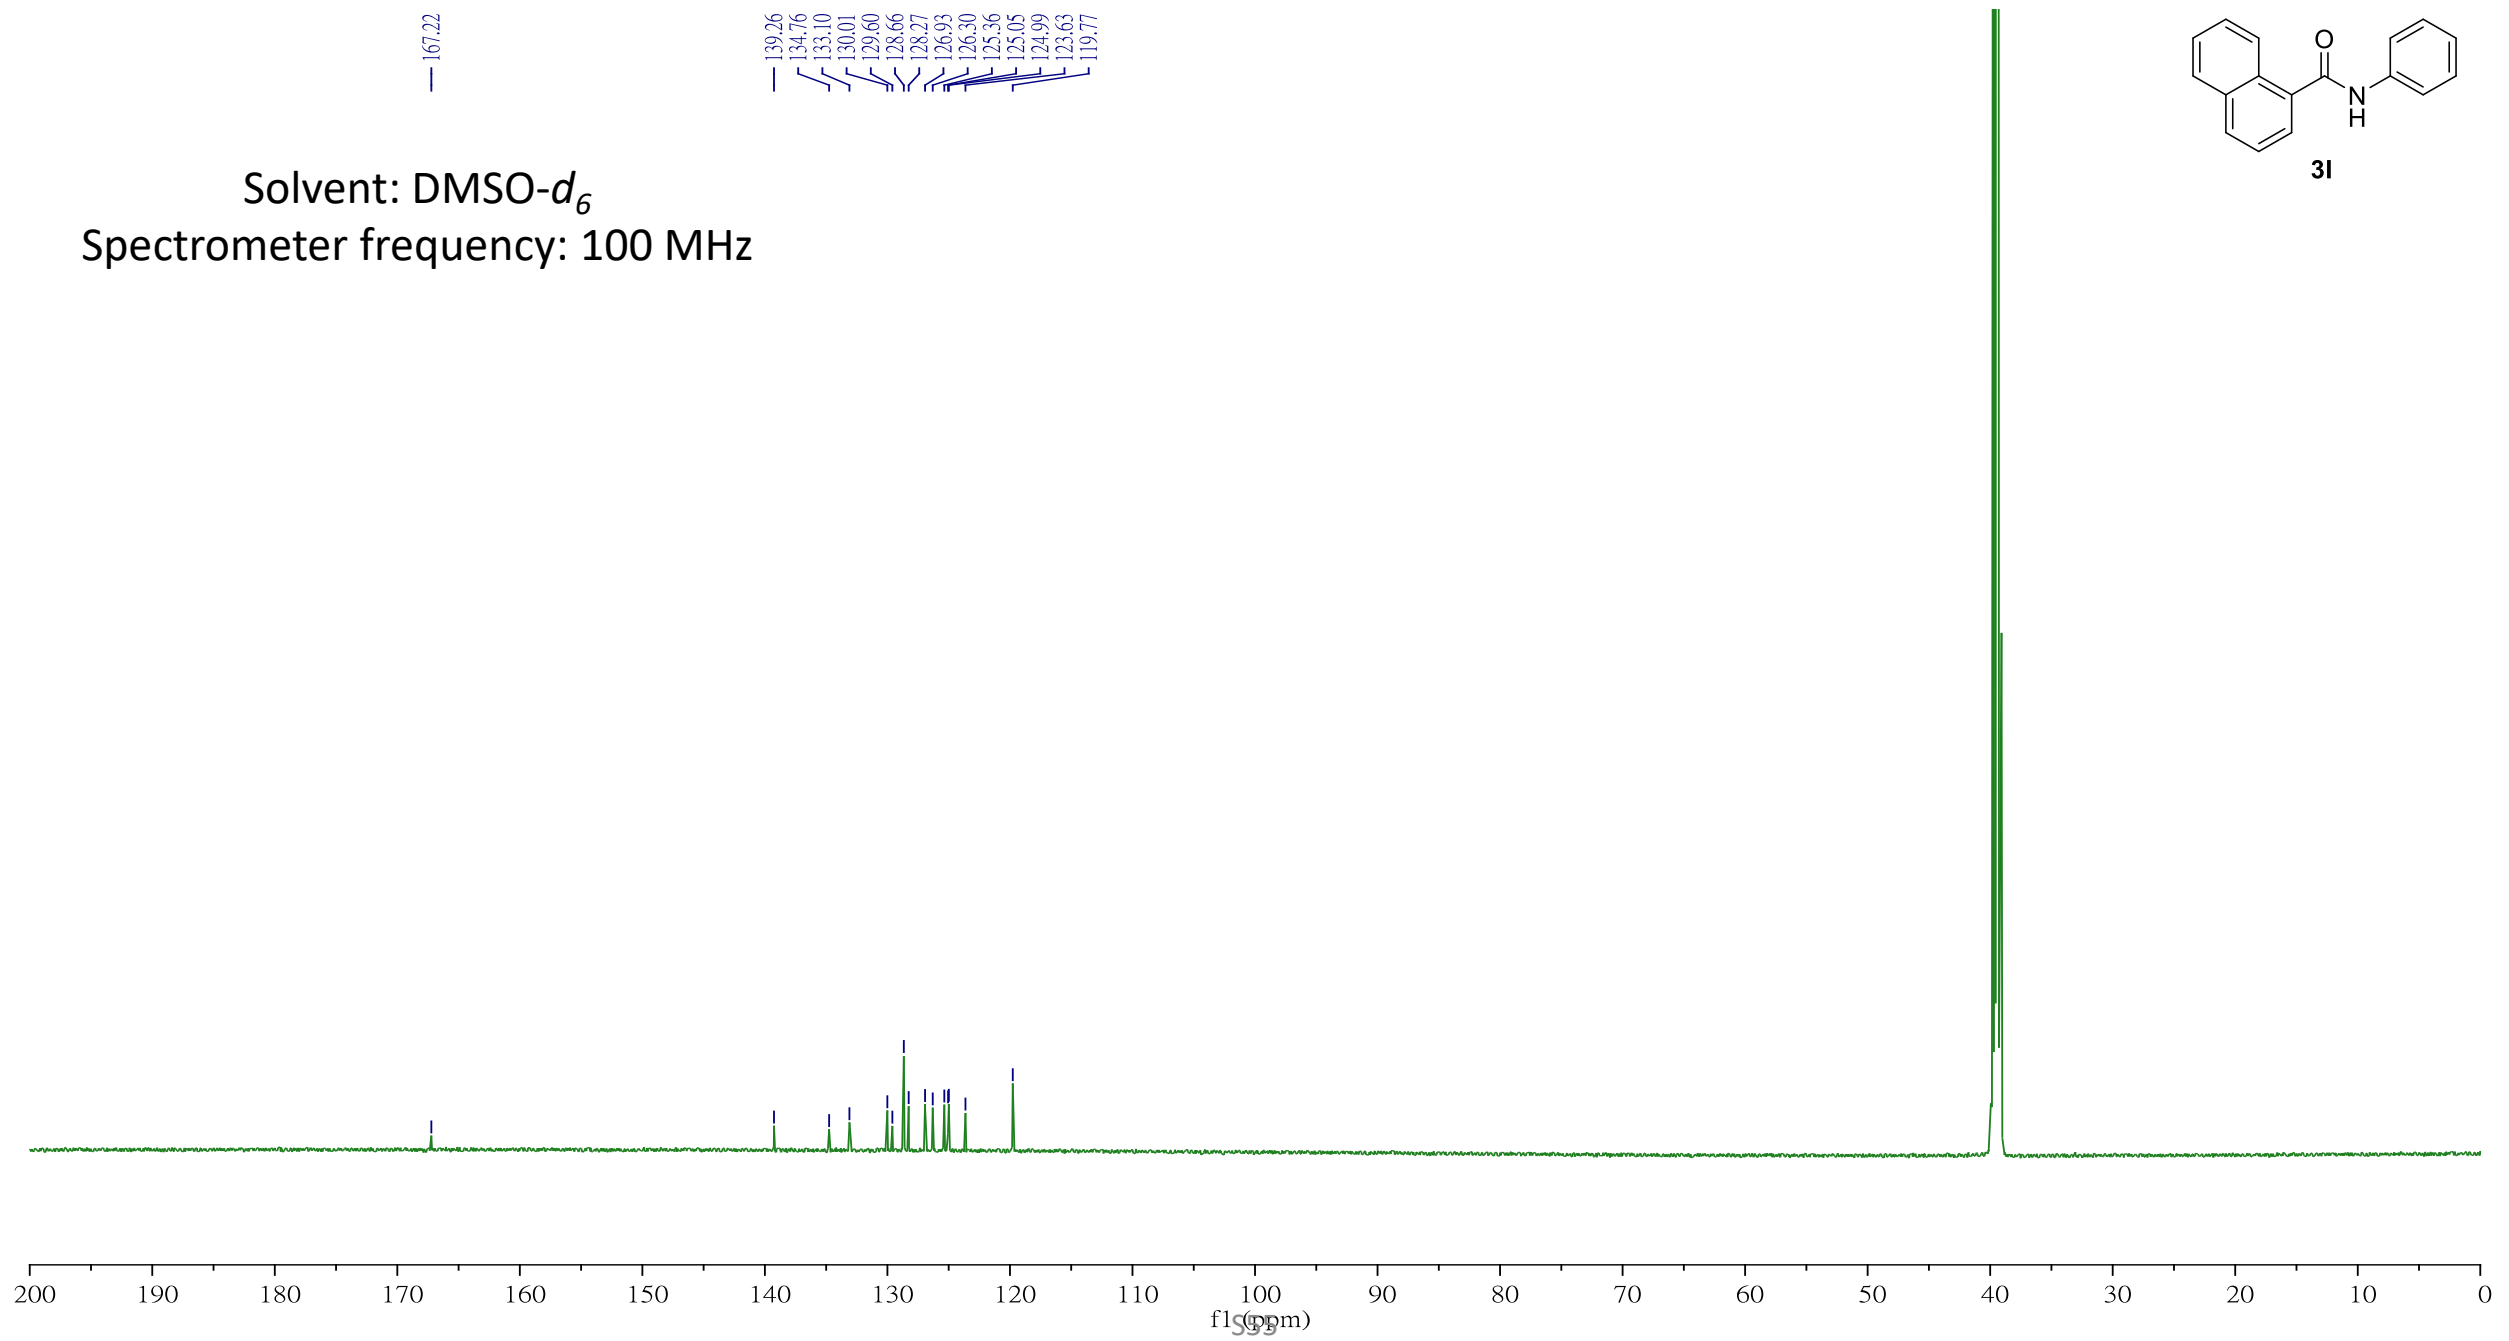



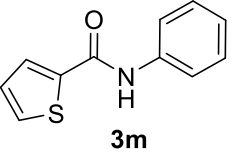

Solvent: DMSO- $d_6$   
Spectrometer frequency: 400 MHz

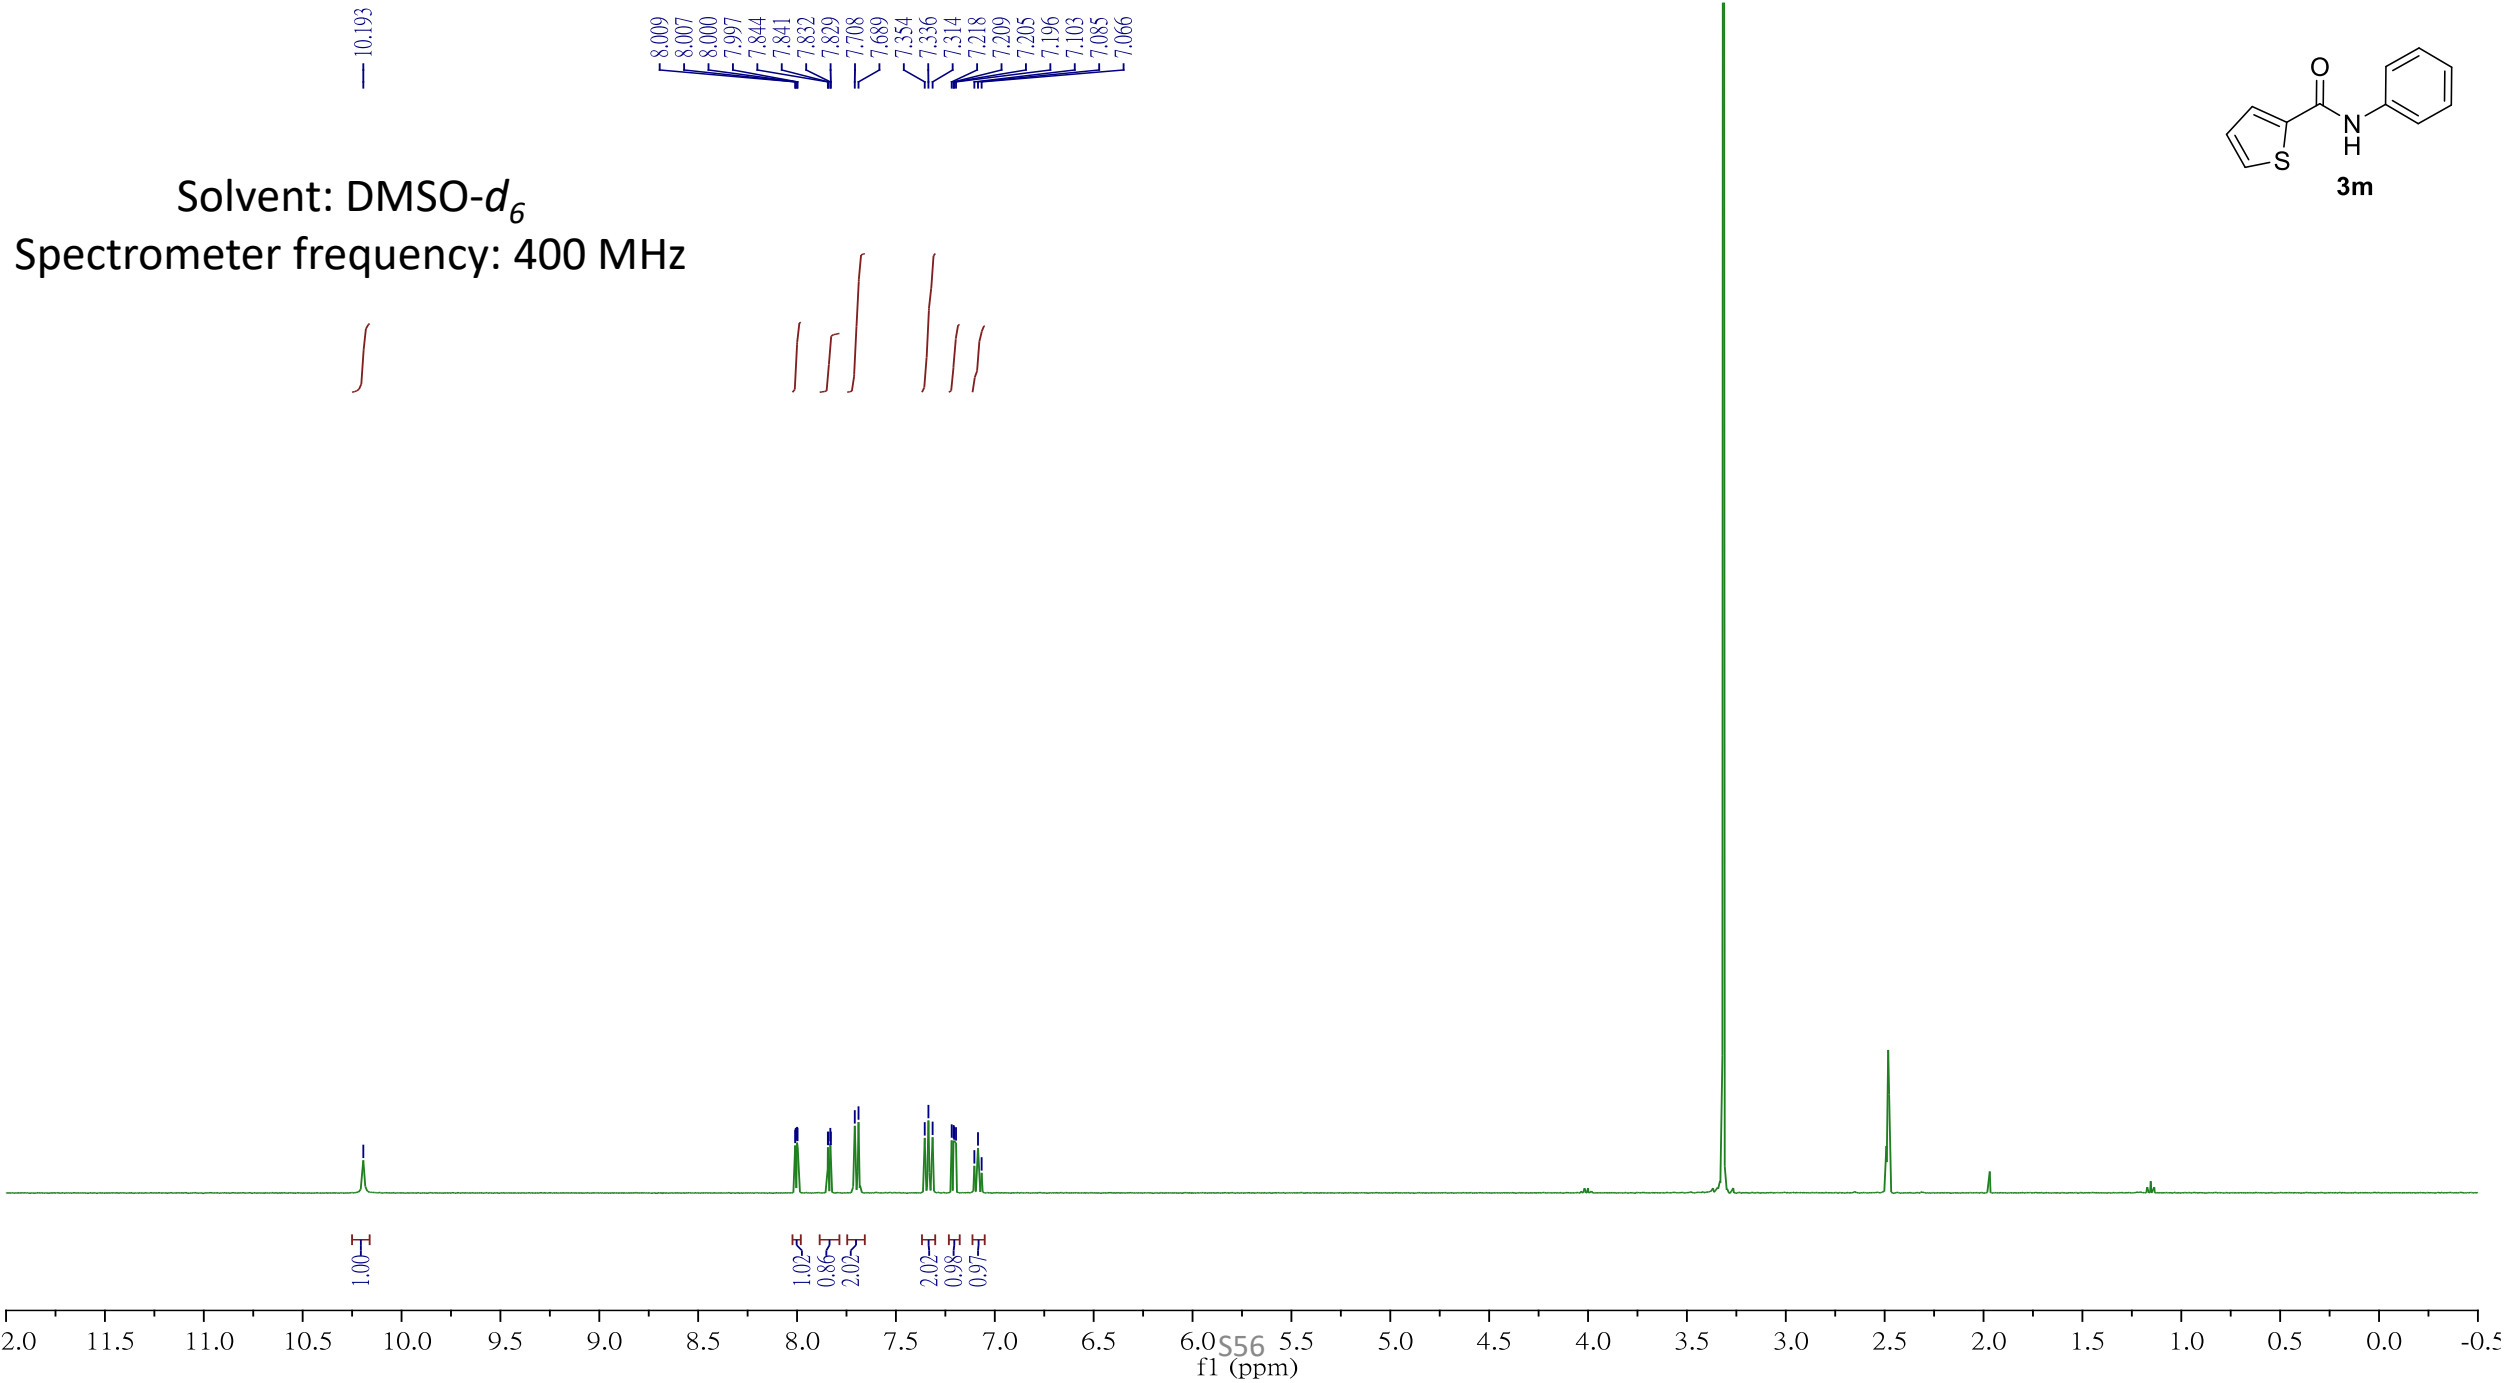

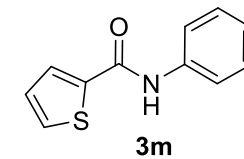

Solvent: DMSO- $d_6$   
Spectrometer frequency: 100 MHz

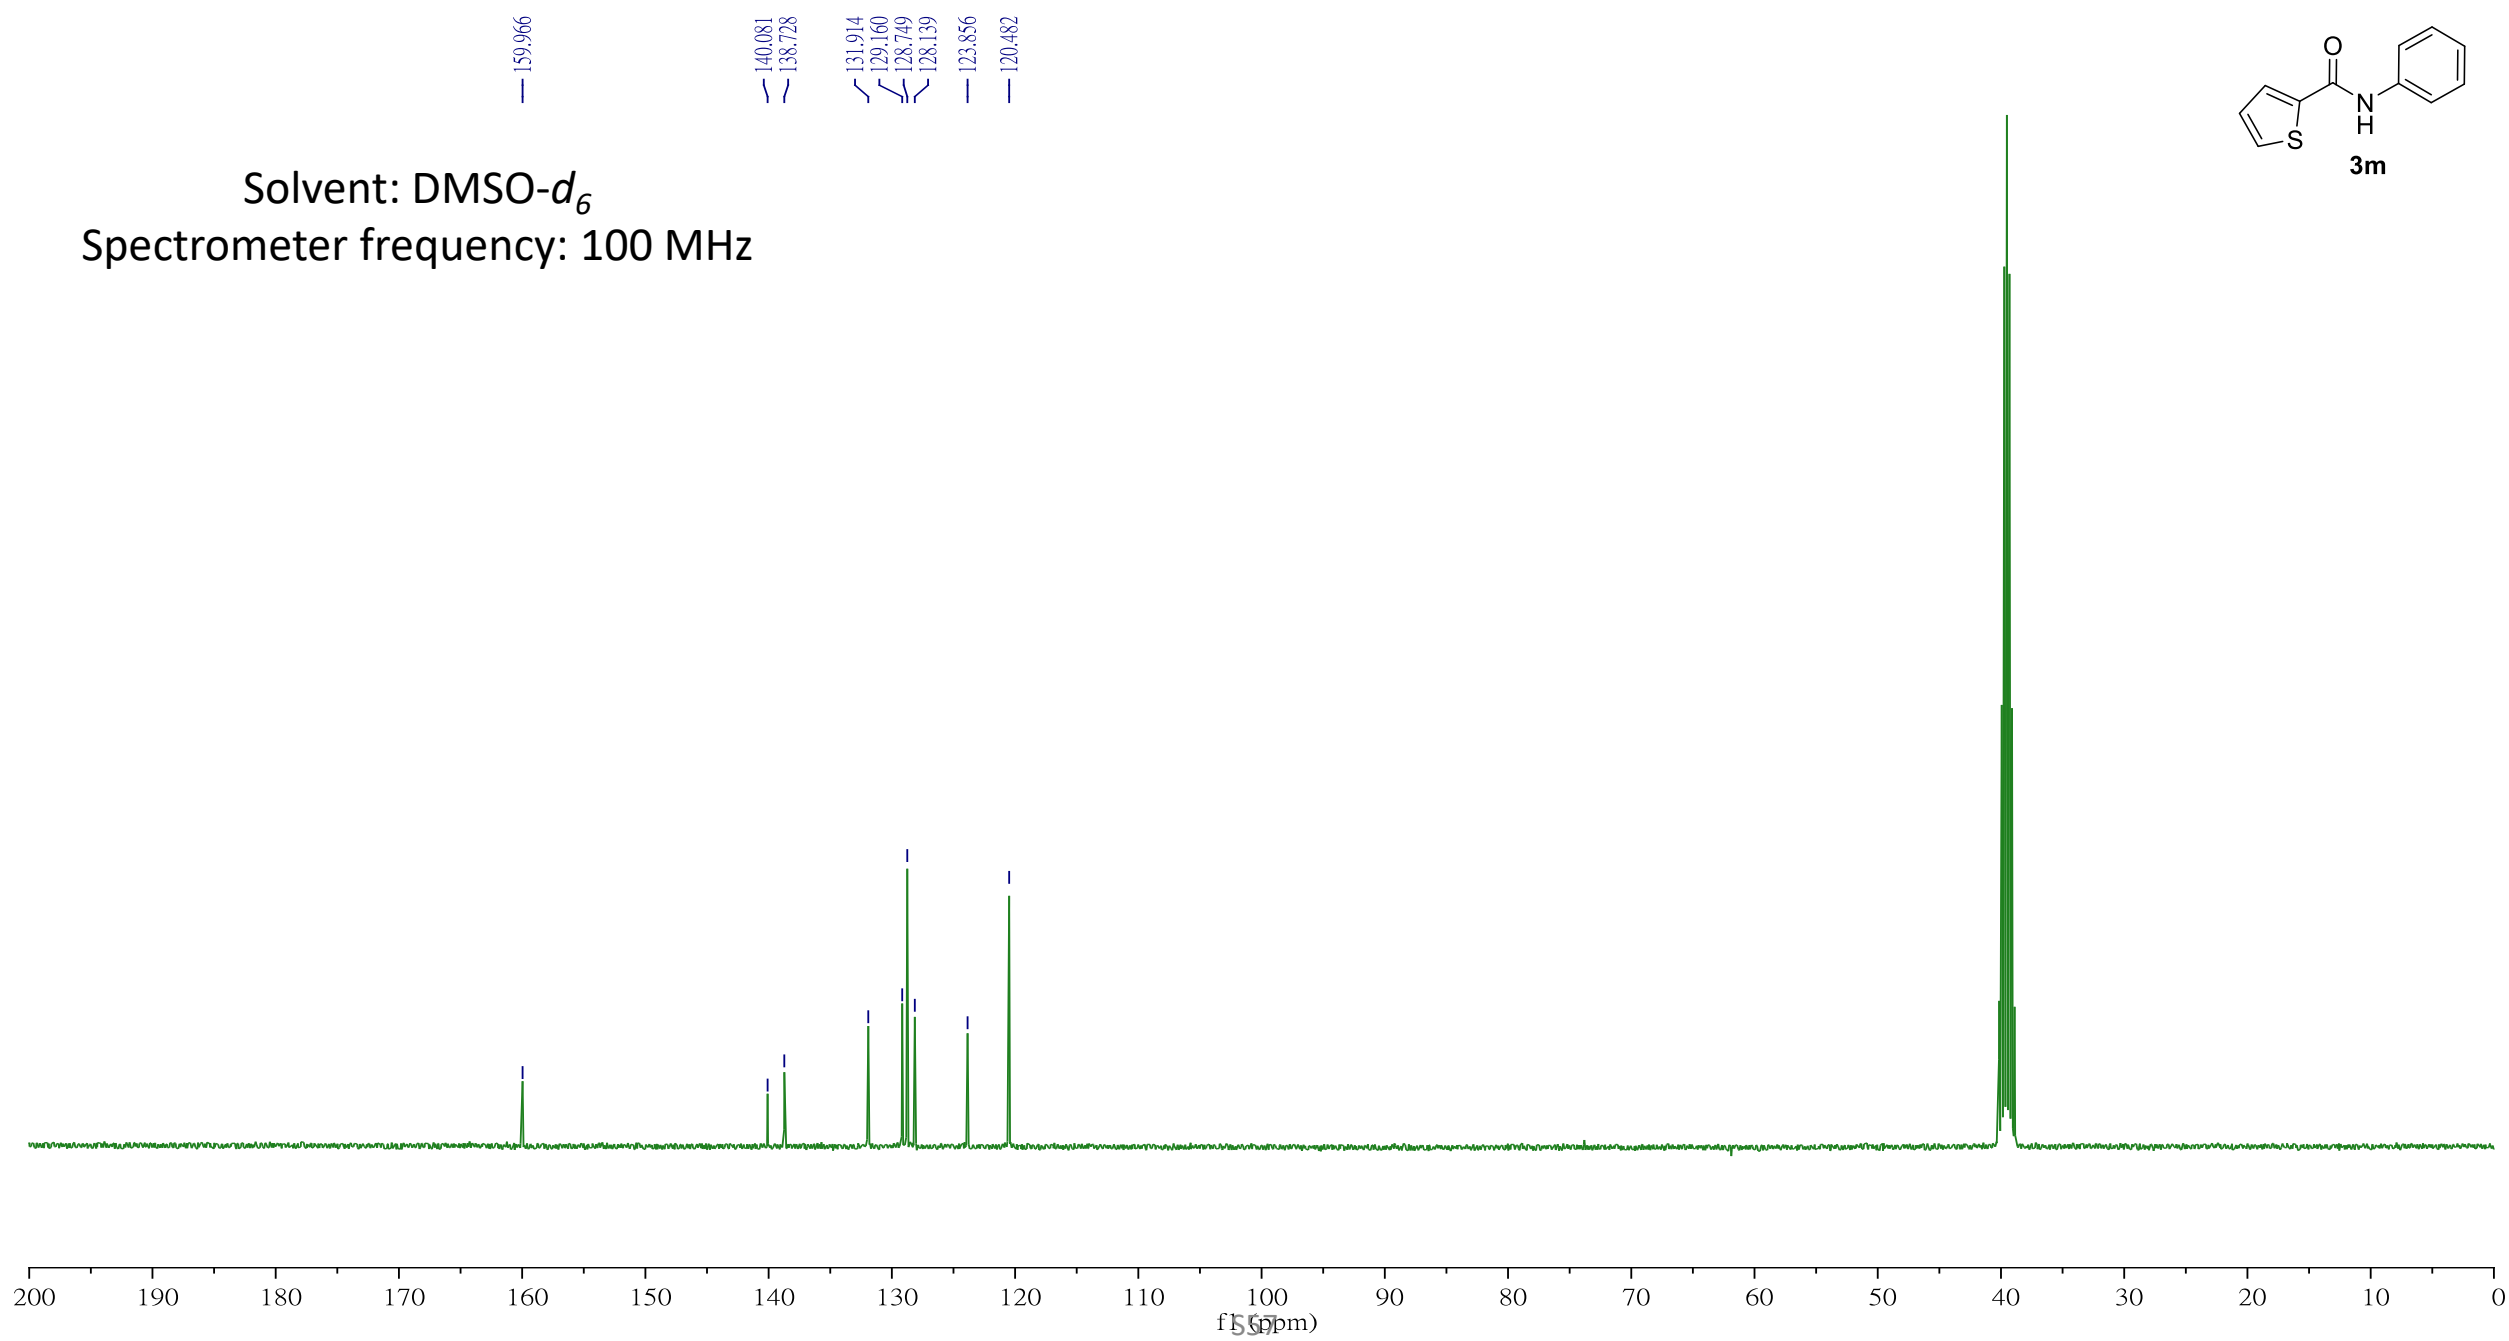

Solvent: DMSO- $d_6$   
Spectrometer frequency: 400 MHz

9.822

7.590  
7.568  
7.291  
7.273  
7.251  
7.023  
7.008  
6.989

2.303  
2.284  
2.266

1.336  
1.287  
1.282  
1.272  
1.260  
1.246  
1.234  
0.874  
0.859  
0.842

3n

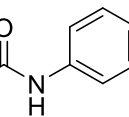

0.96

1.90  
1.96  
1.06

2.00

2.02

8.07

3.16

0.96

1.90  
1.96  
1.06

2.00

2.02

8.07

3.16

f1 (ppm)

Solvent: DMSO- $d_6$   
Spectrometer frequency: 100 MHz

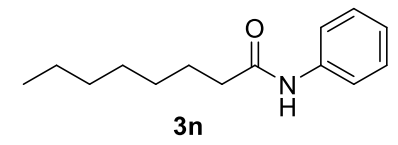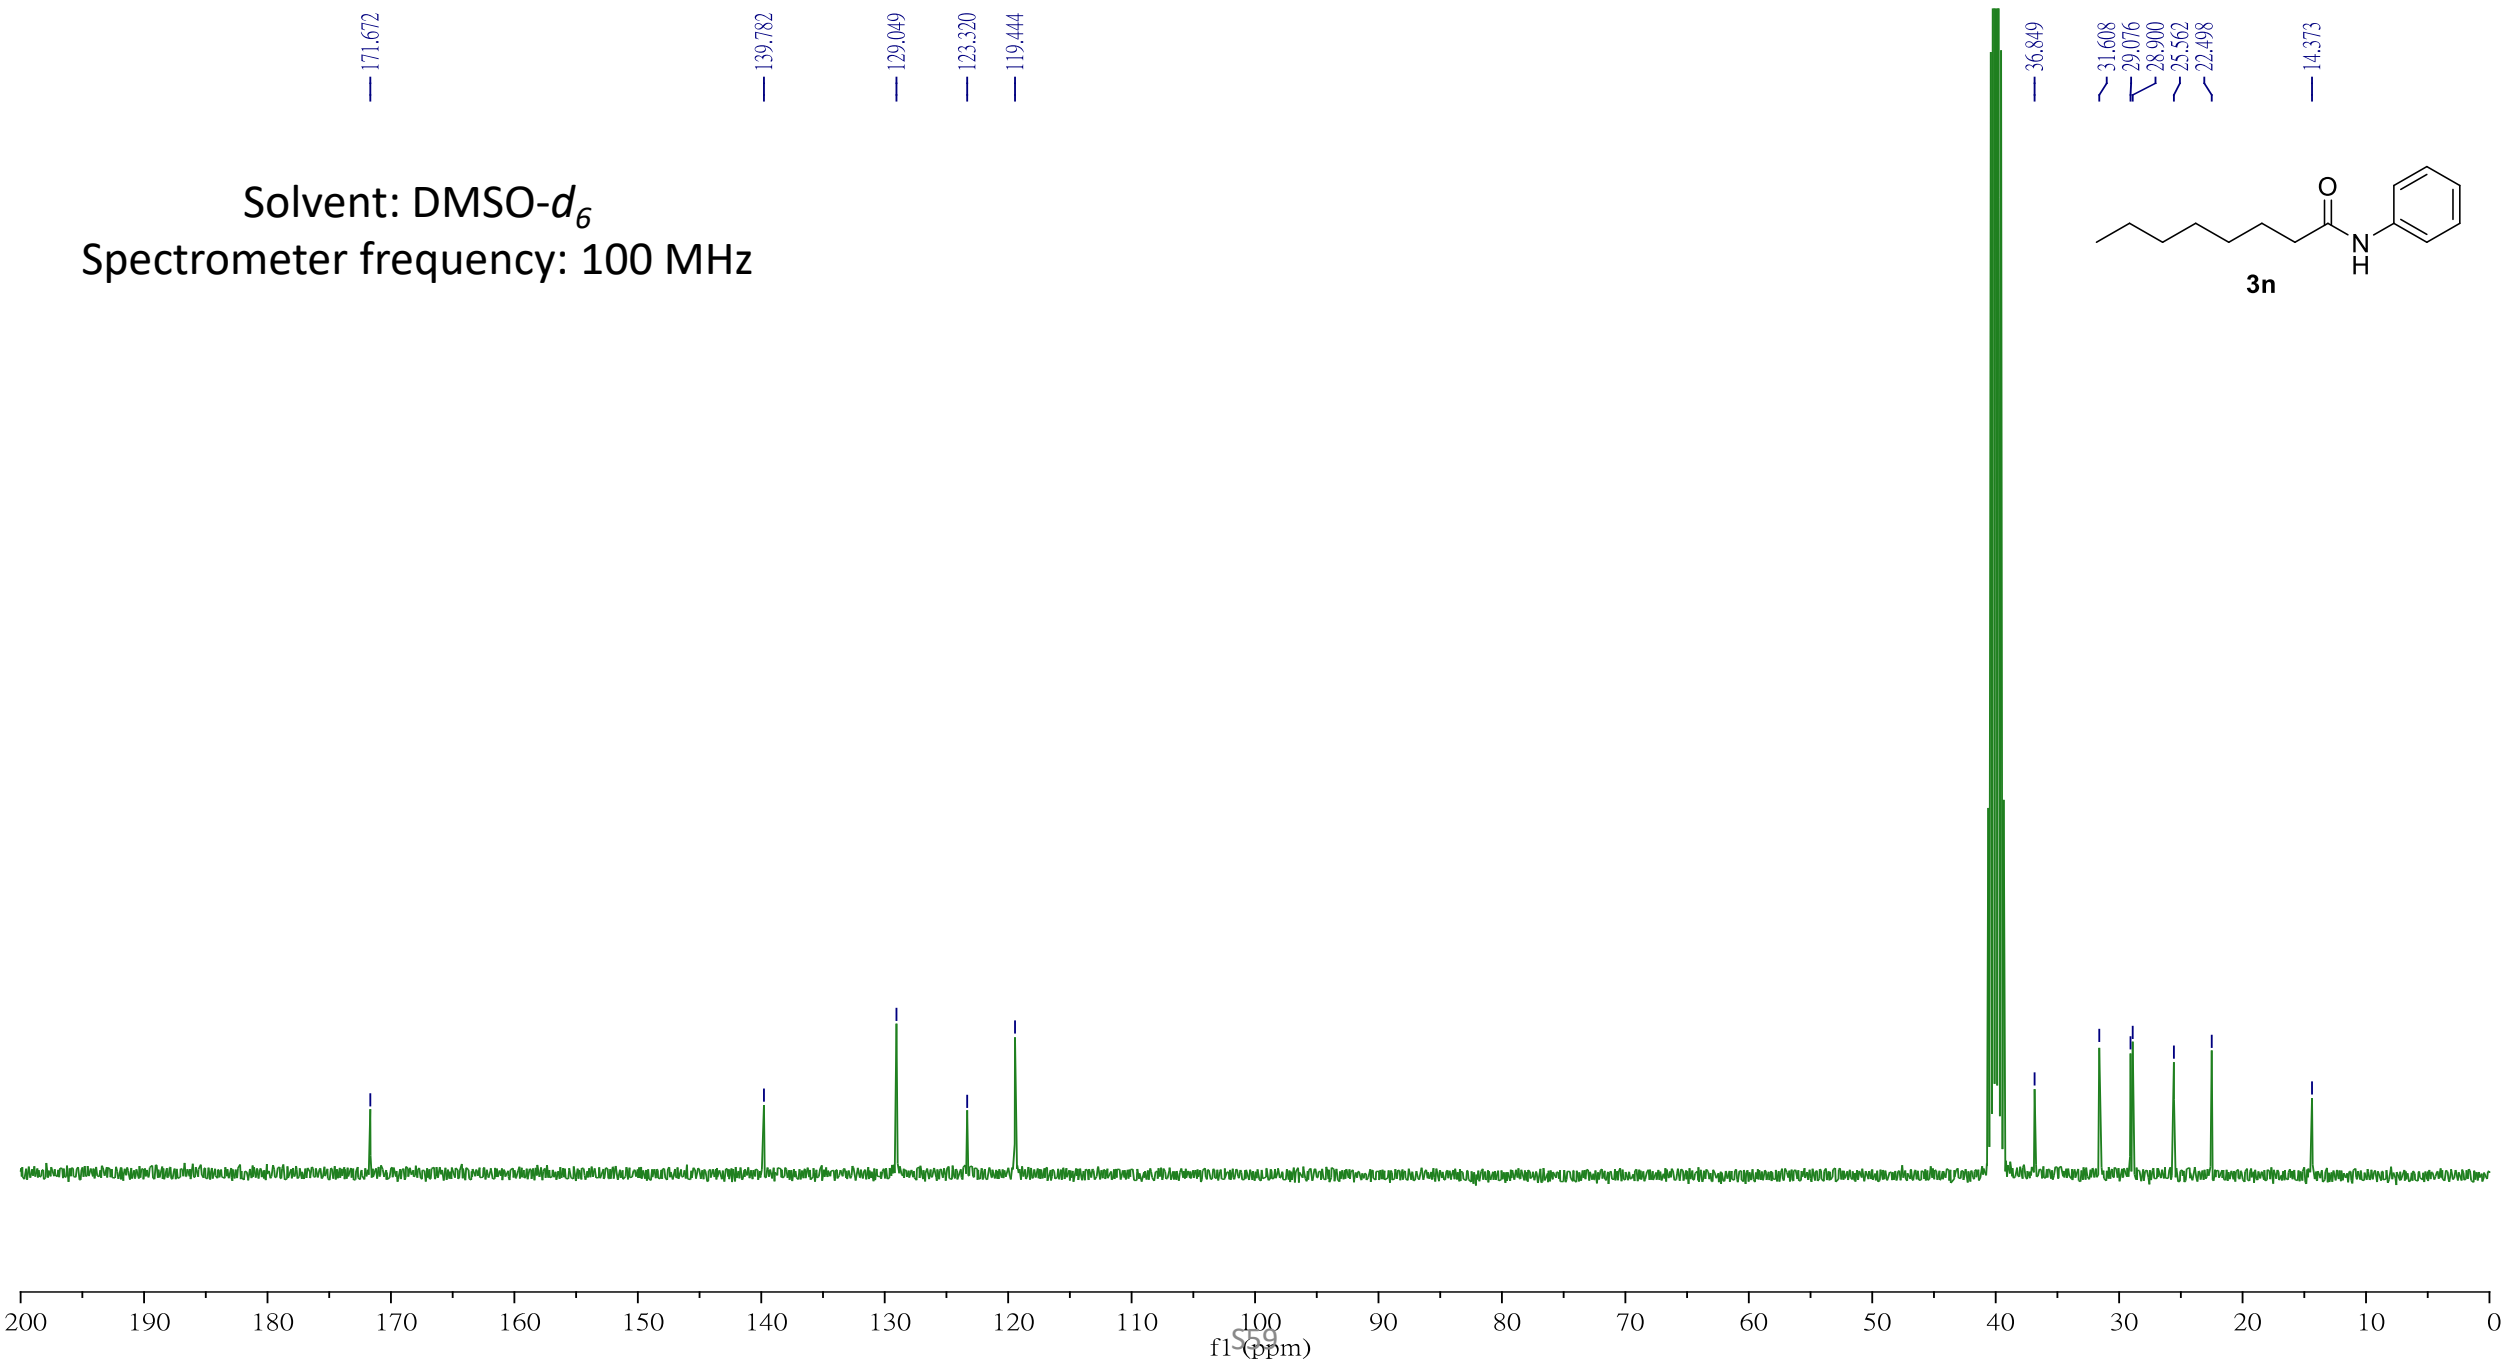

Solvent: DMSO- $d_6$   
Spectrometer frequency: 400 MHz

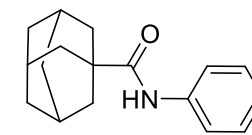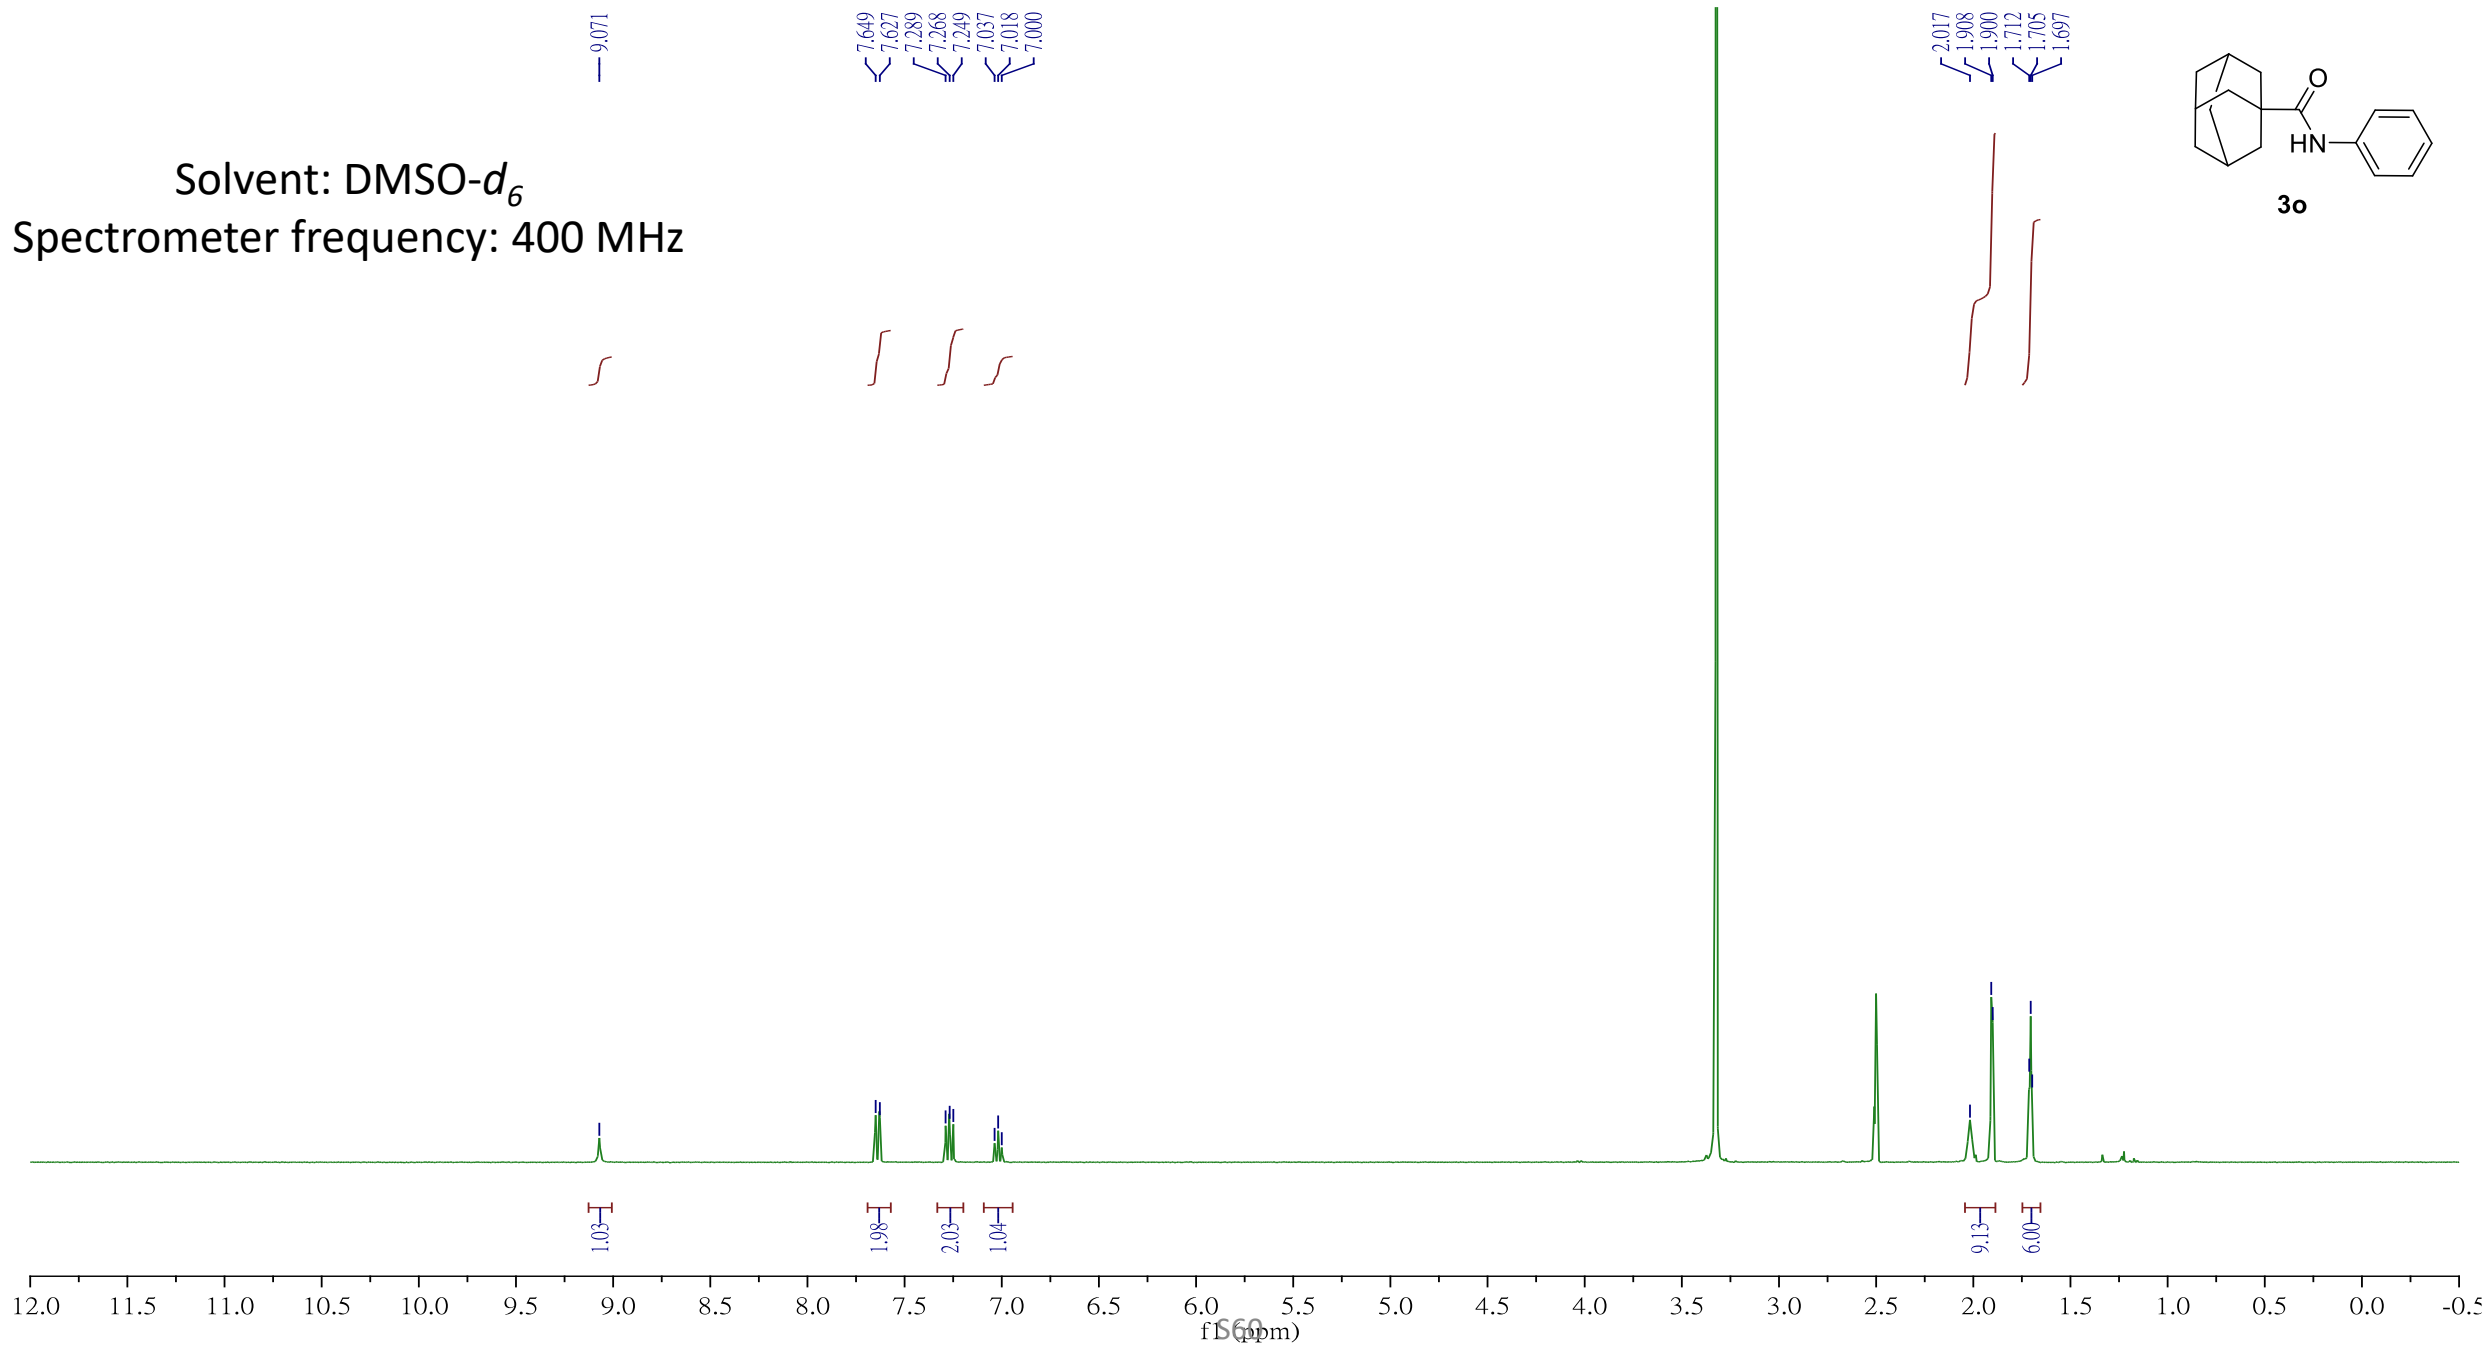

Solvent: DMSO- $d_6$   
Spectrometer frequency: 100 MHz

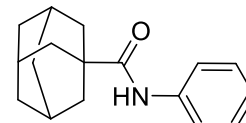

176.333

139.767

128.788

123.514

120.647

41.330

38.749

36.468

28.131

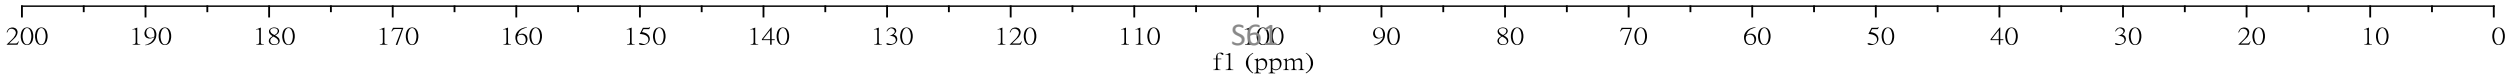

Solvent: DMSO- $d_6$   
Spectrometer frequency: 400 MHz

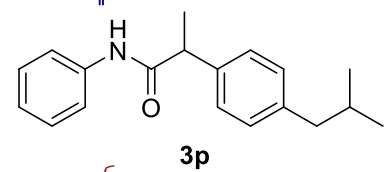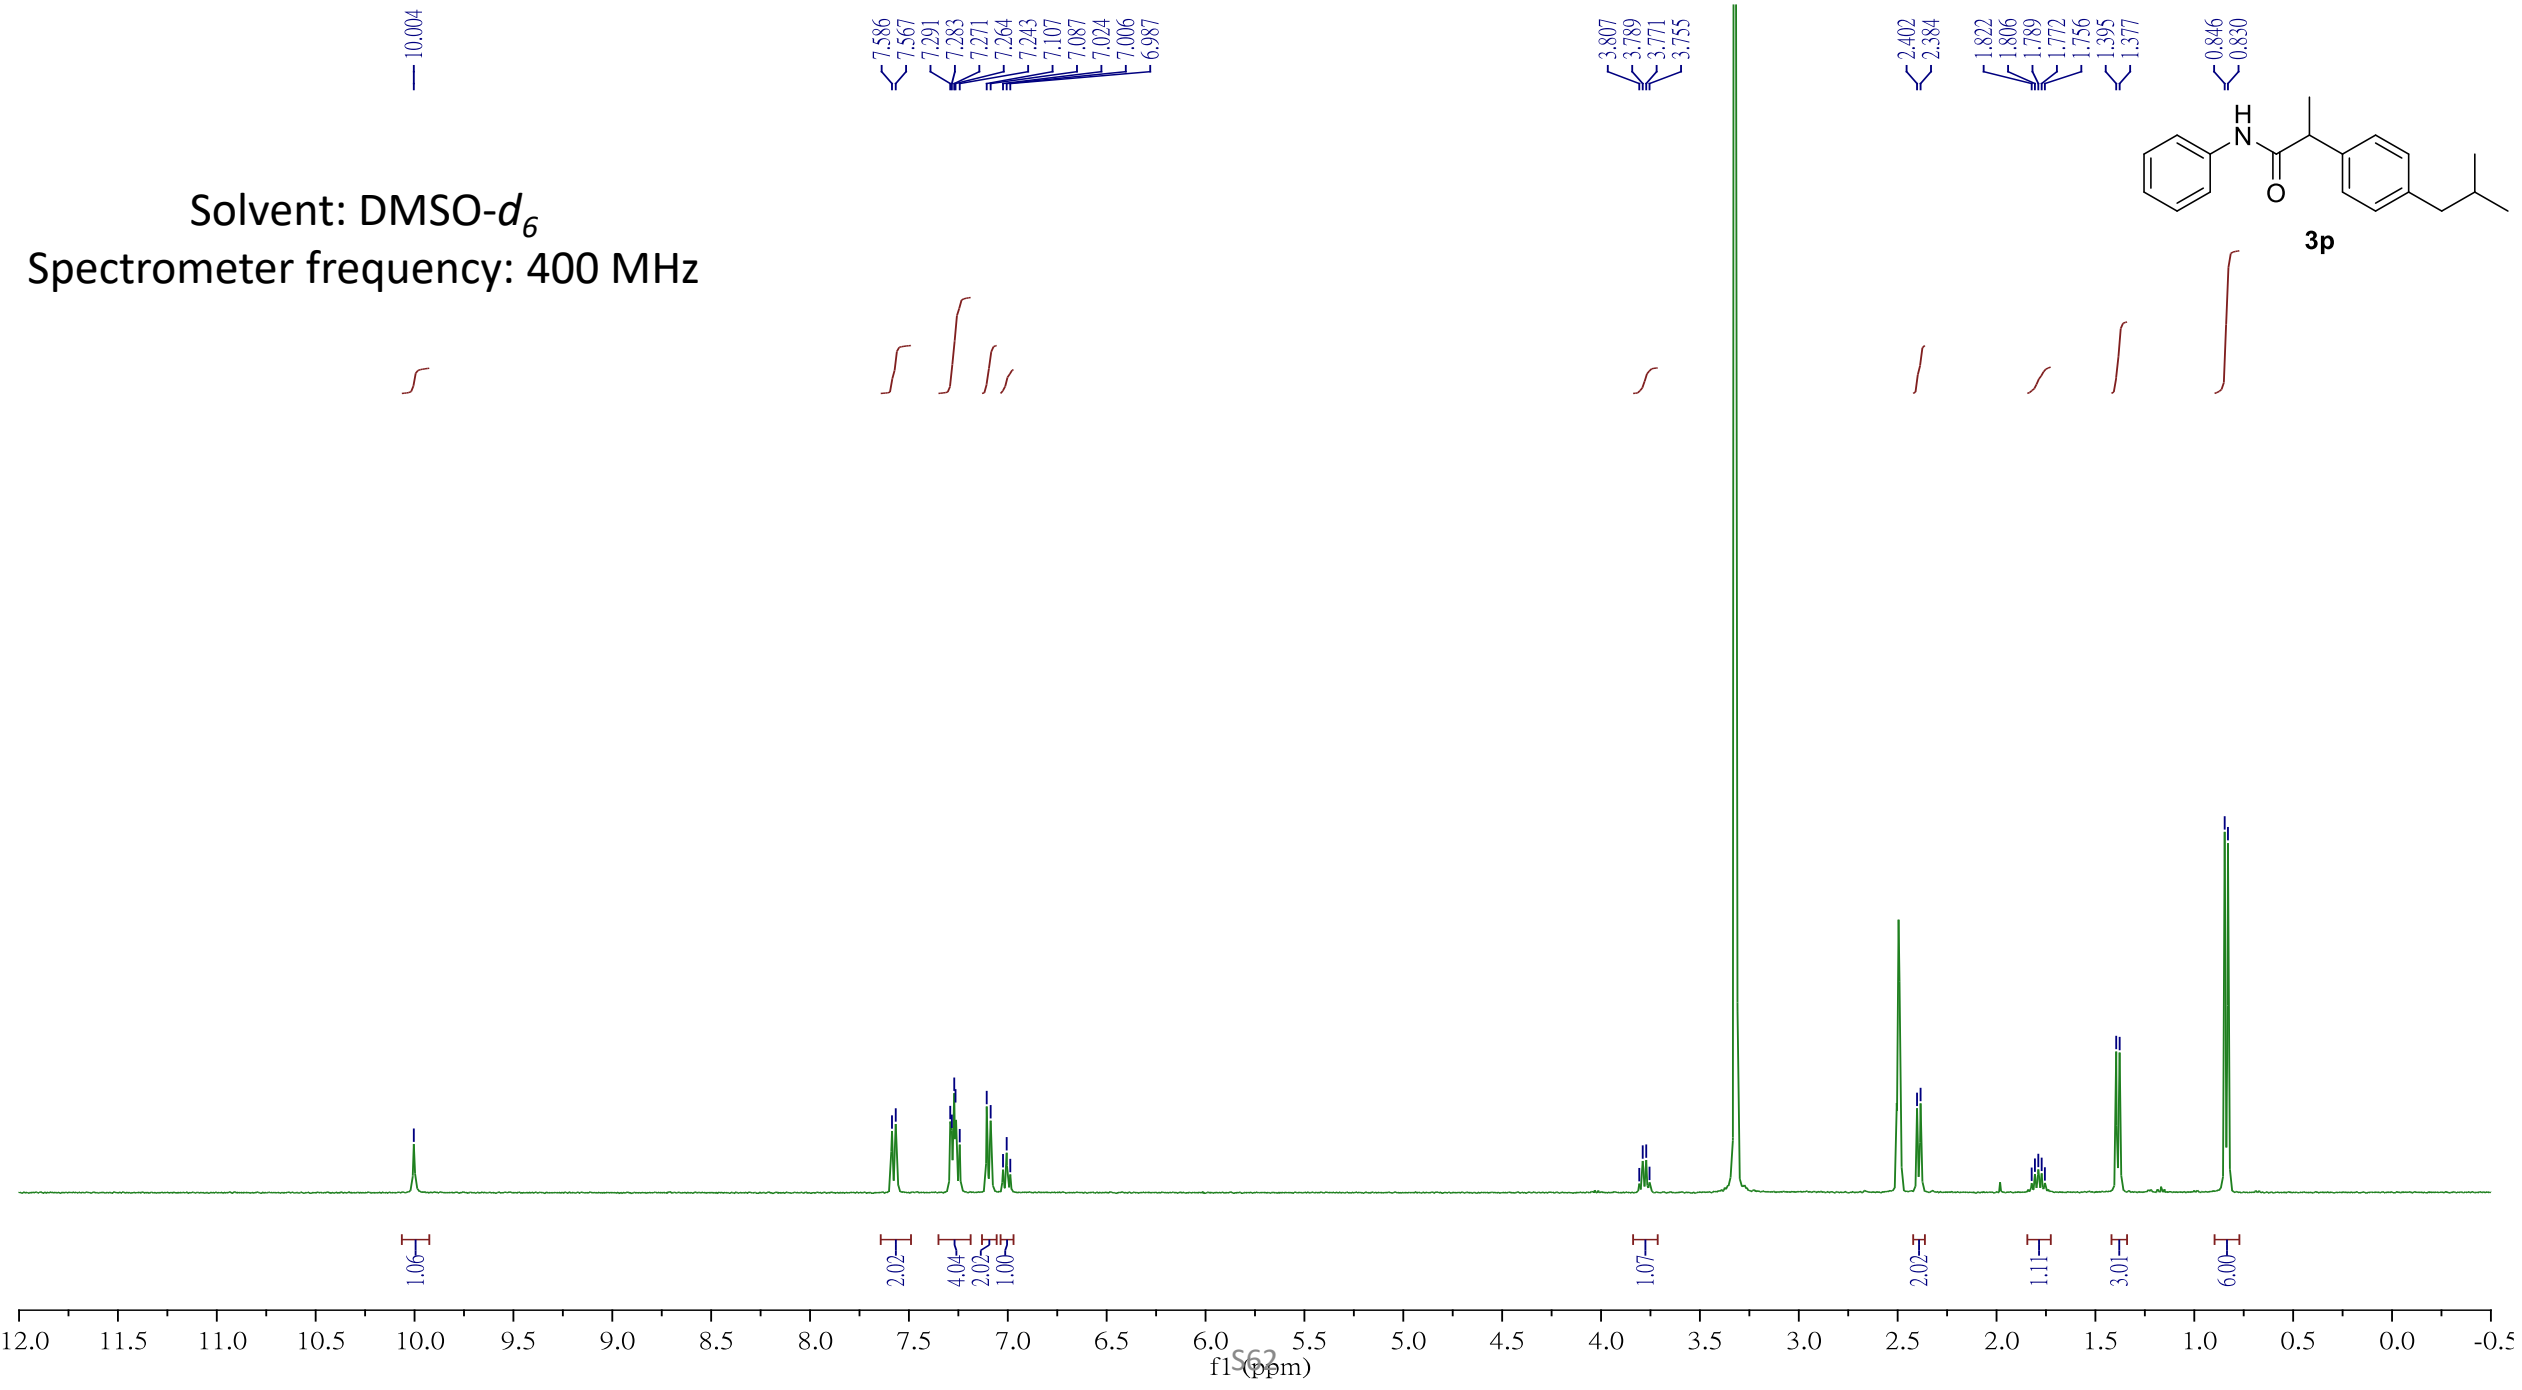

Solvent: DMSO- $d_6$   
Spectrometer frequency: 100 MHz

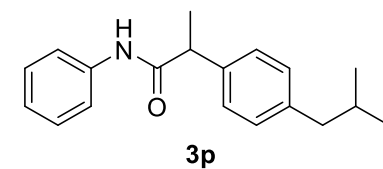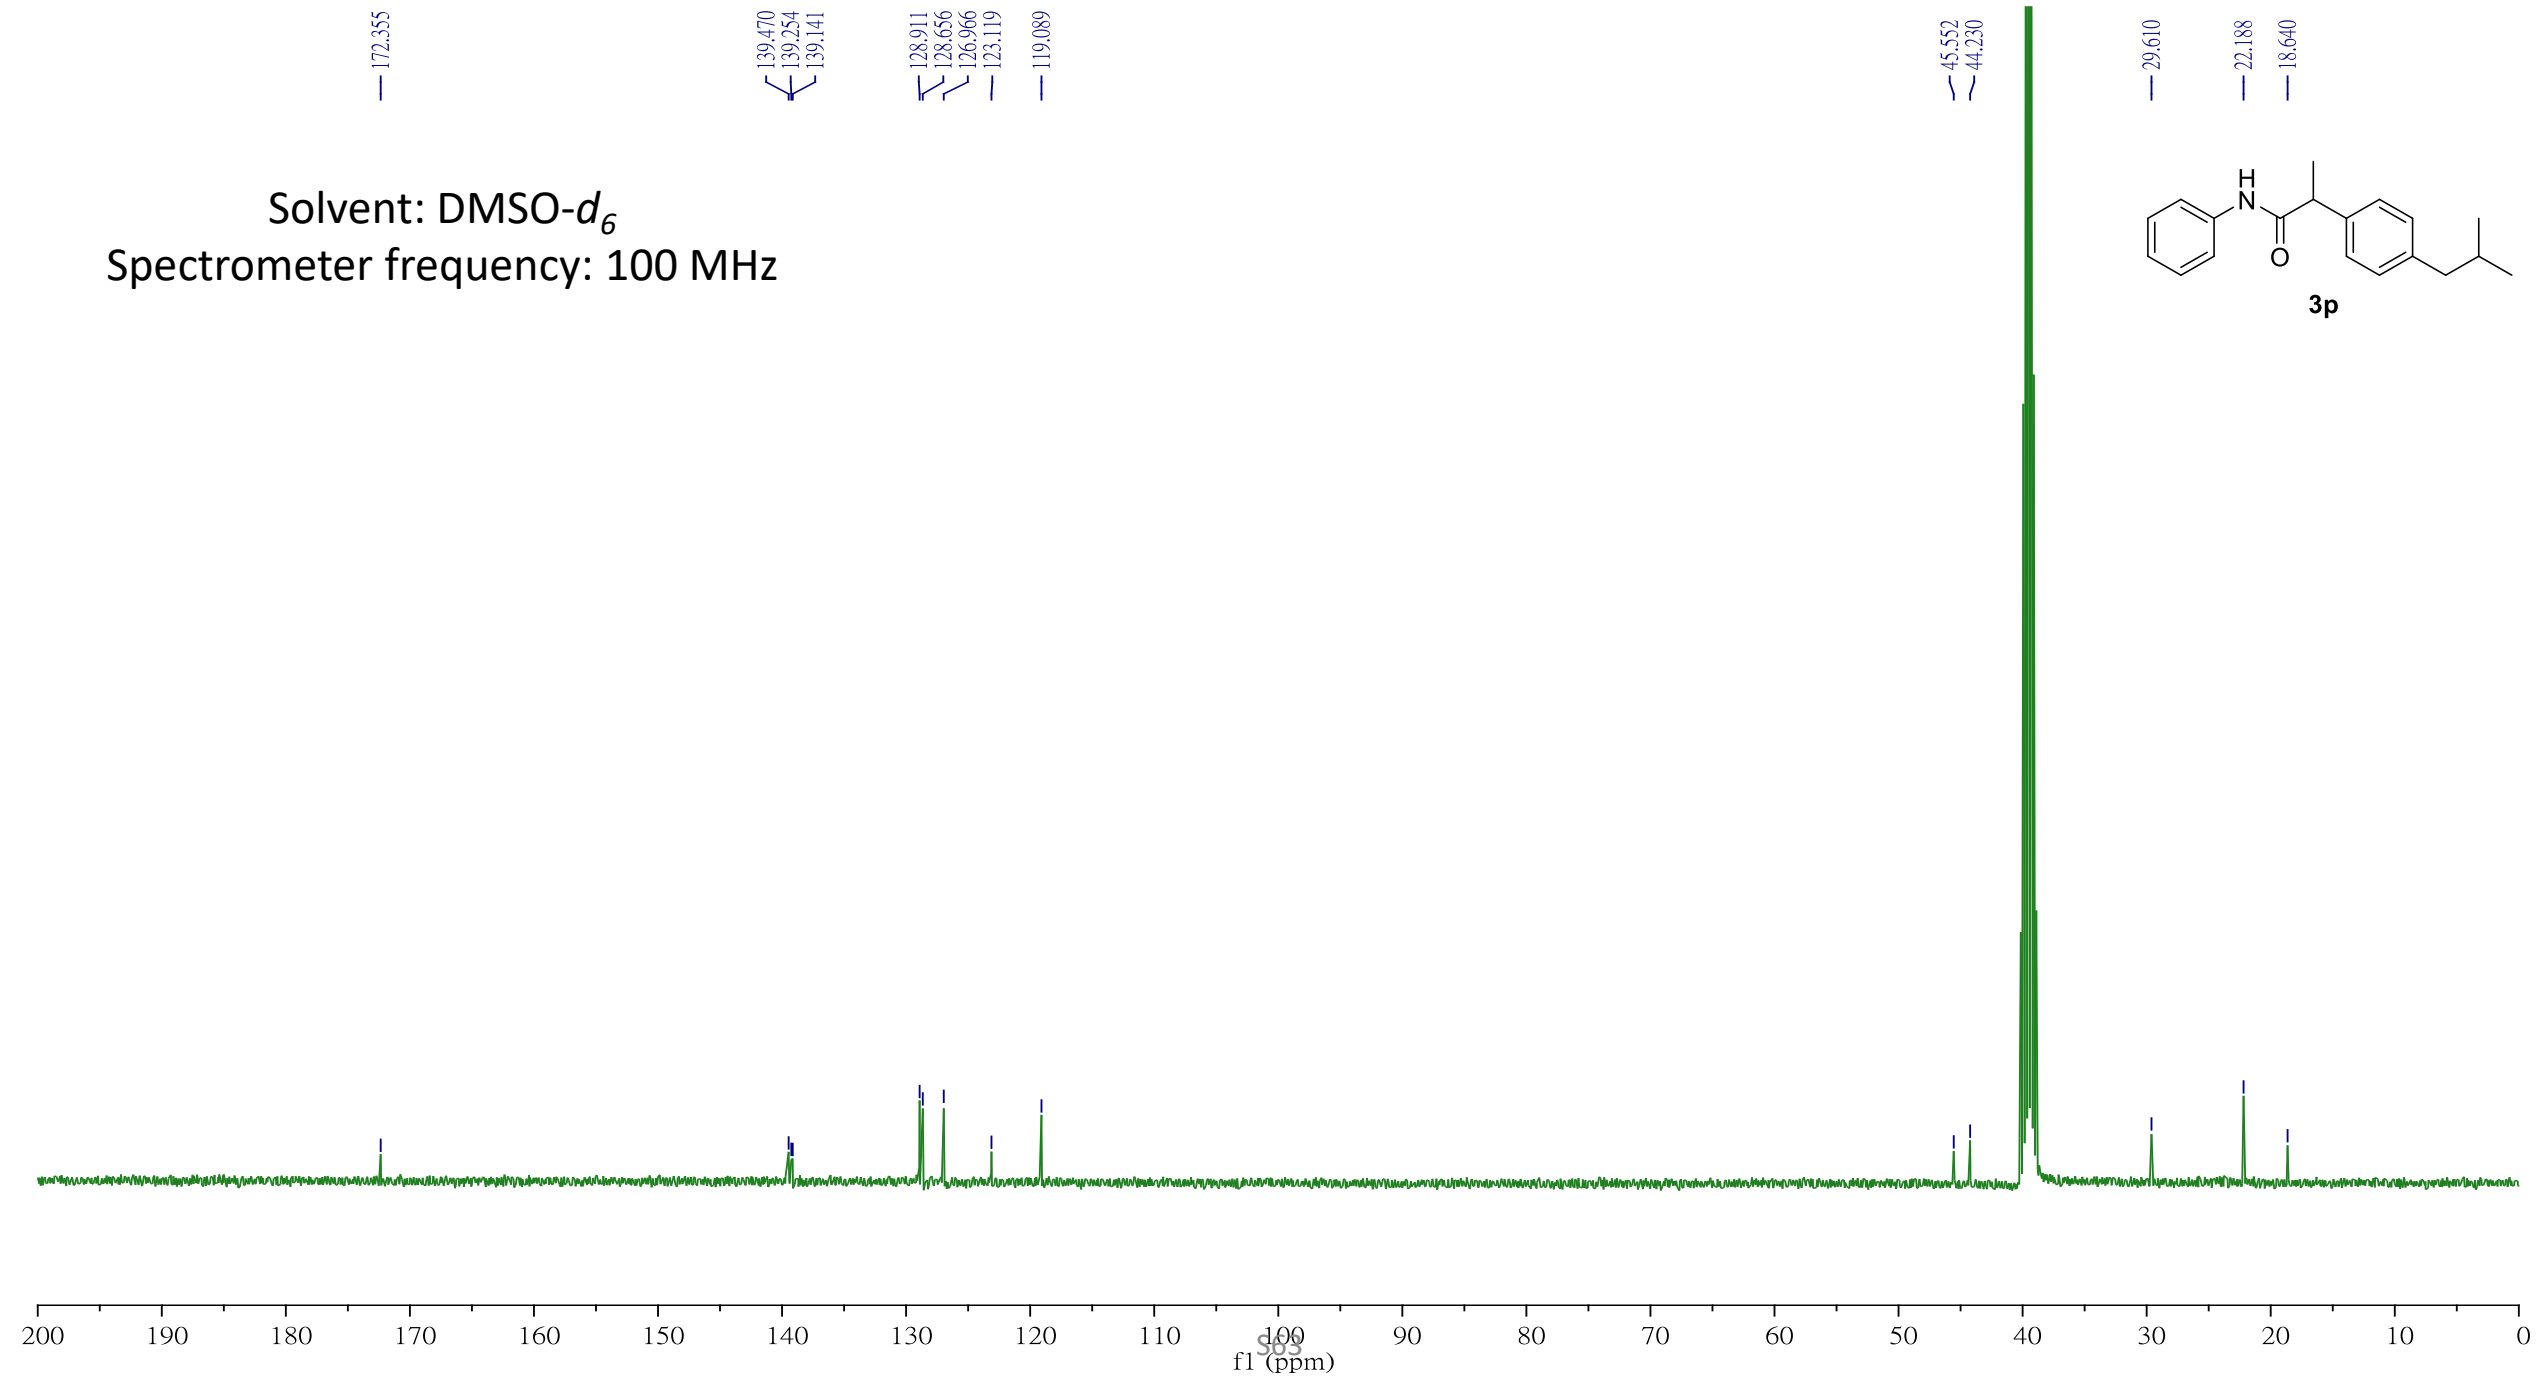



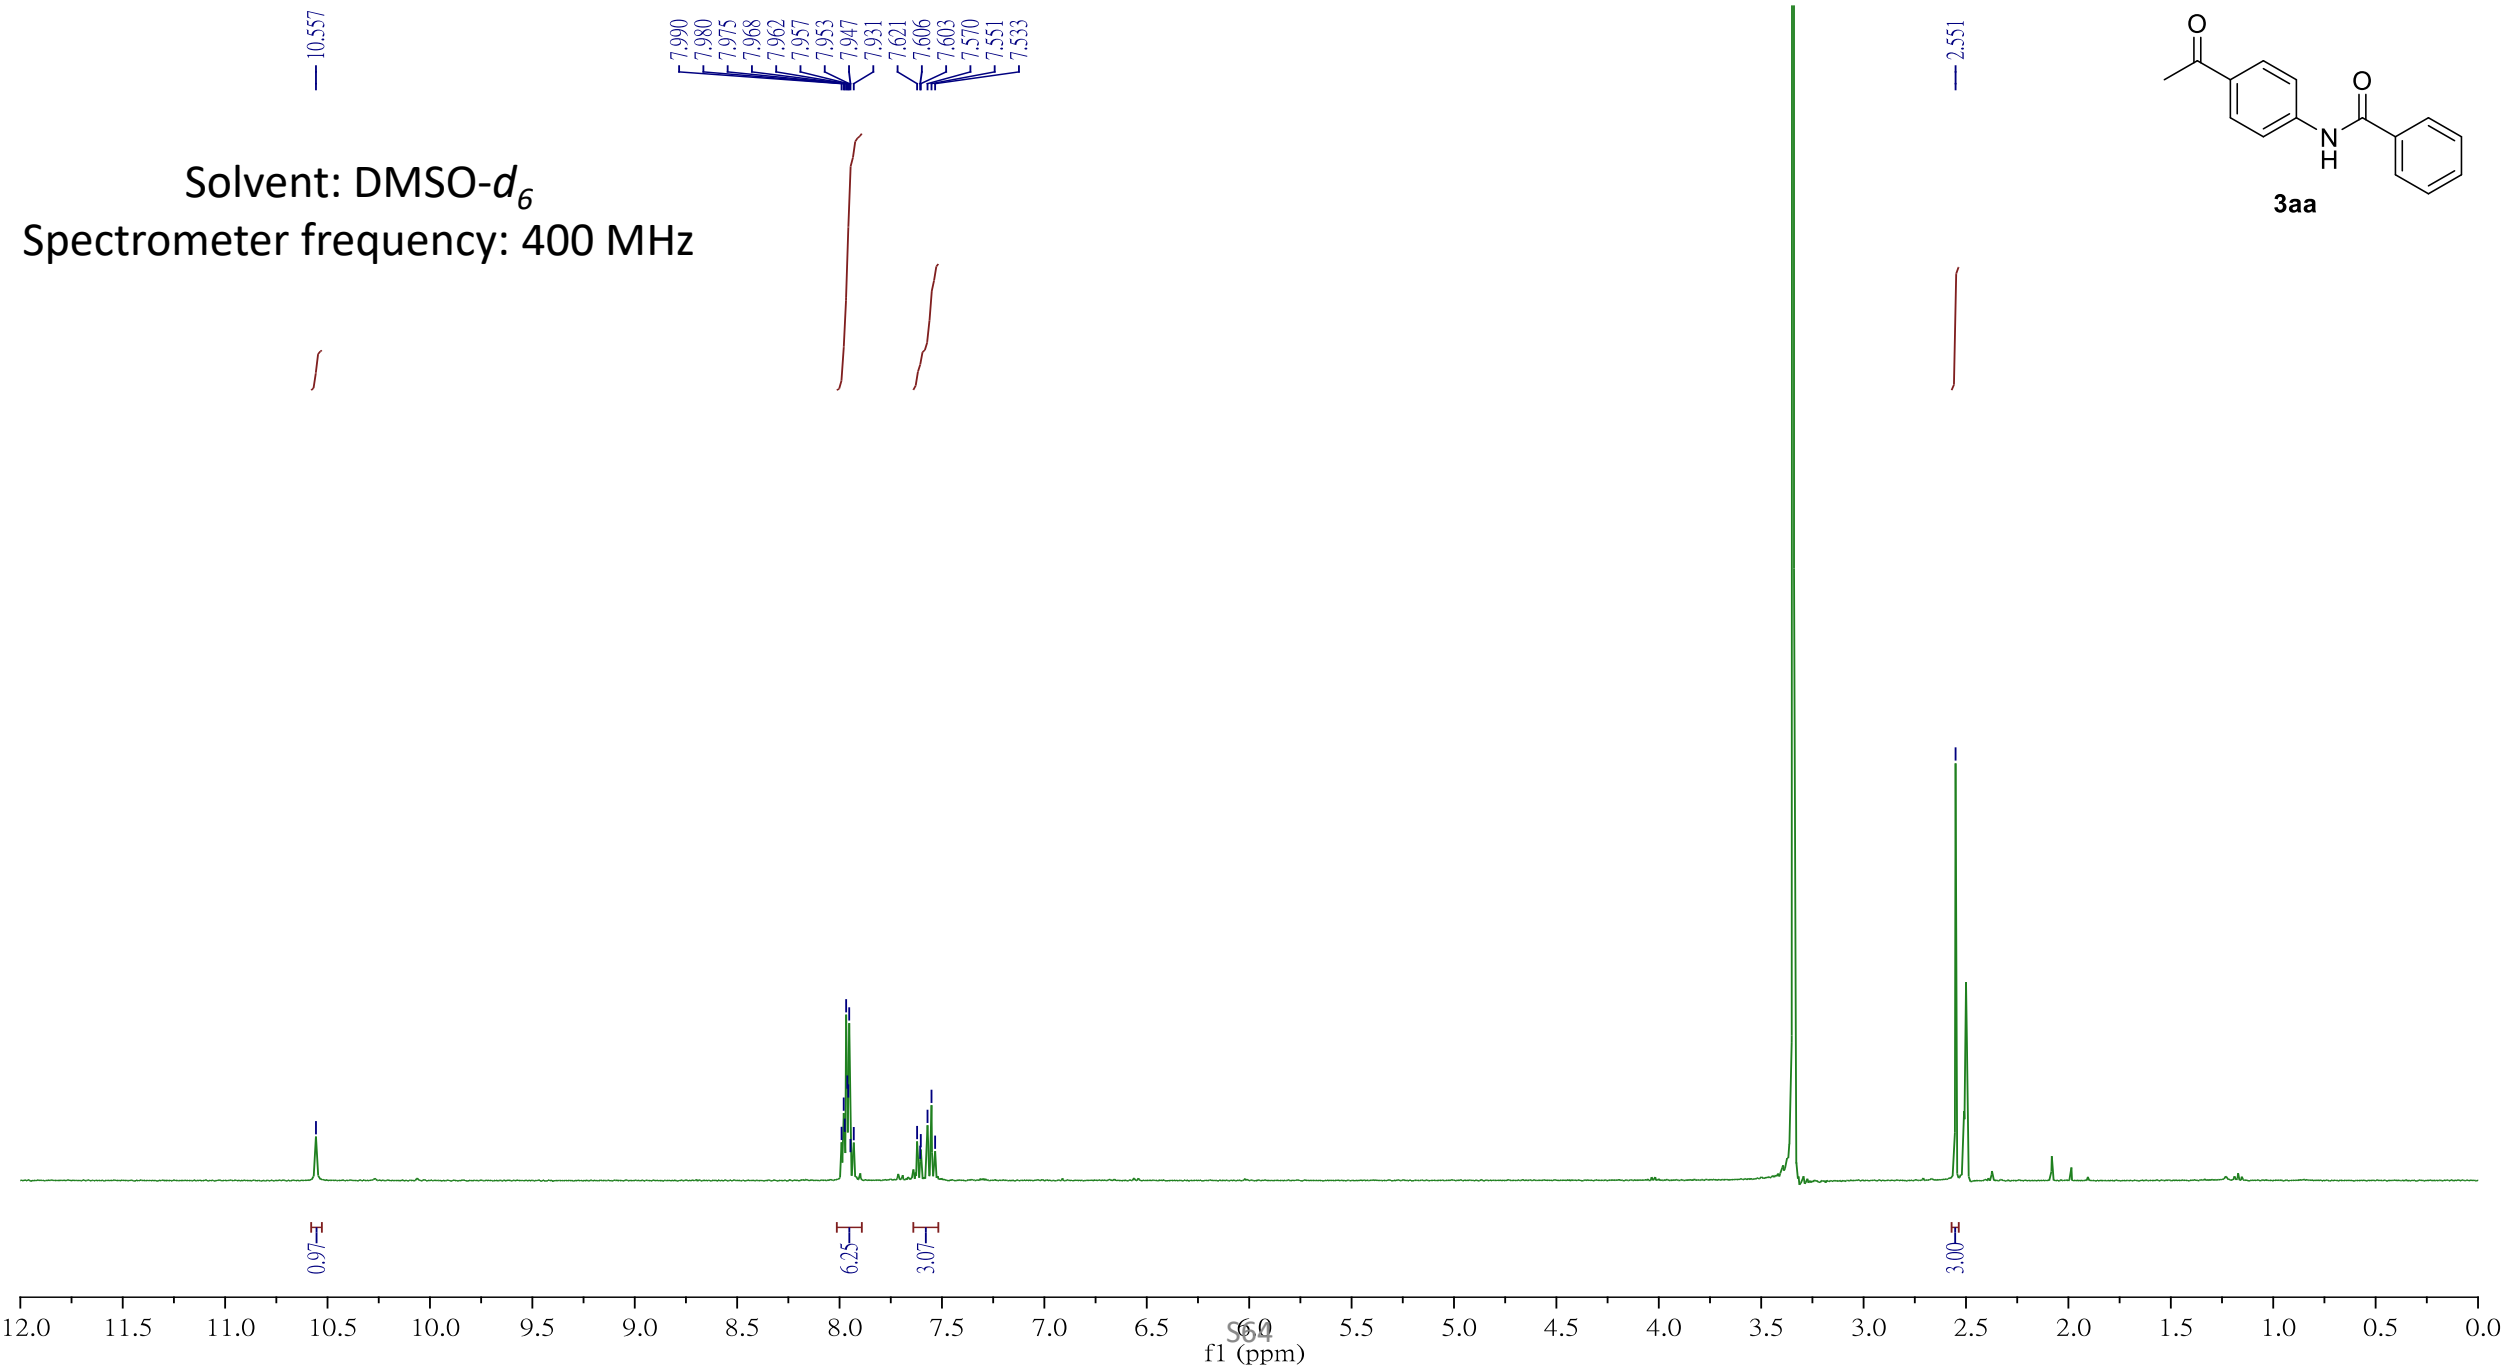

197.057  
166.436  
144.033  
134.998  
132.450  
132.346  
129.736  
128.901  
128.234  
119.870

Solvent: DMSO- $d_6$   
Spectrometer frequency: 100 MHz

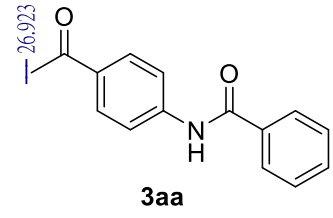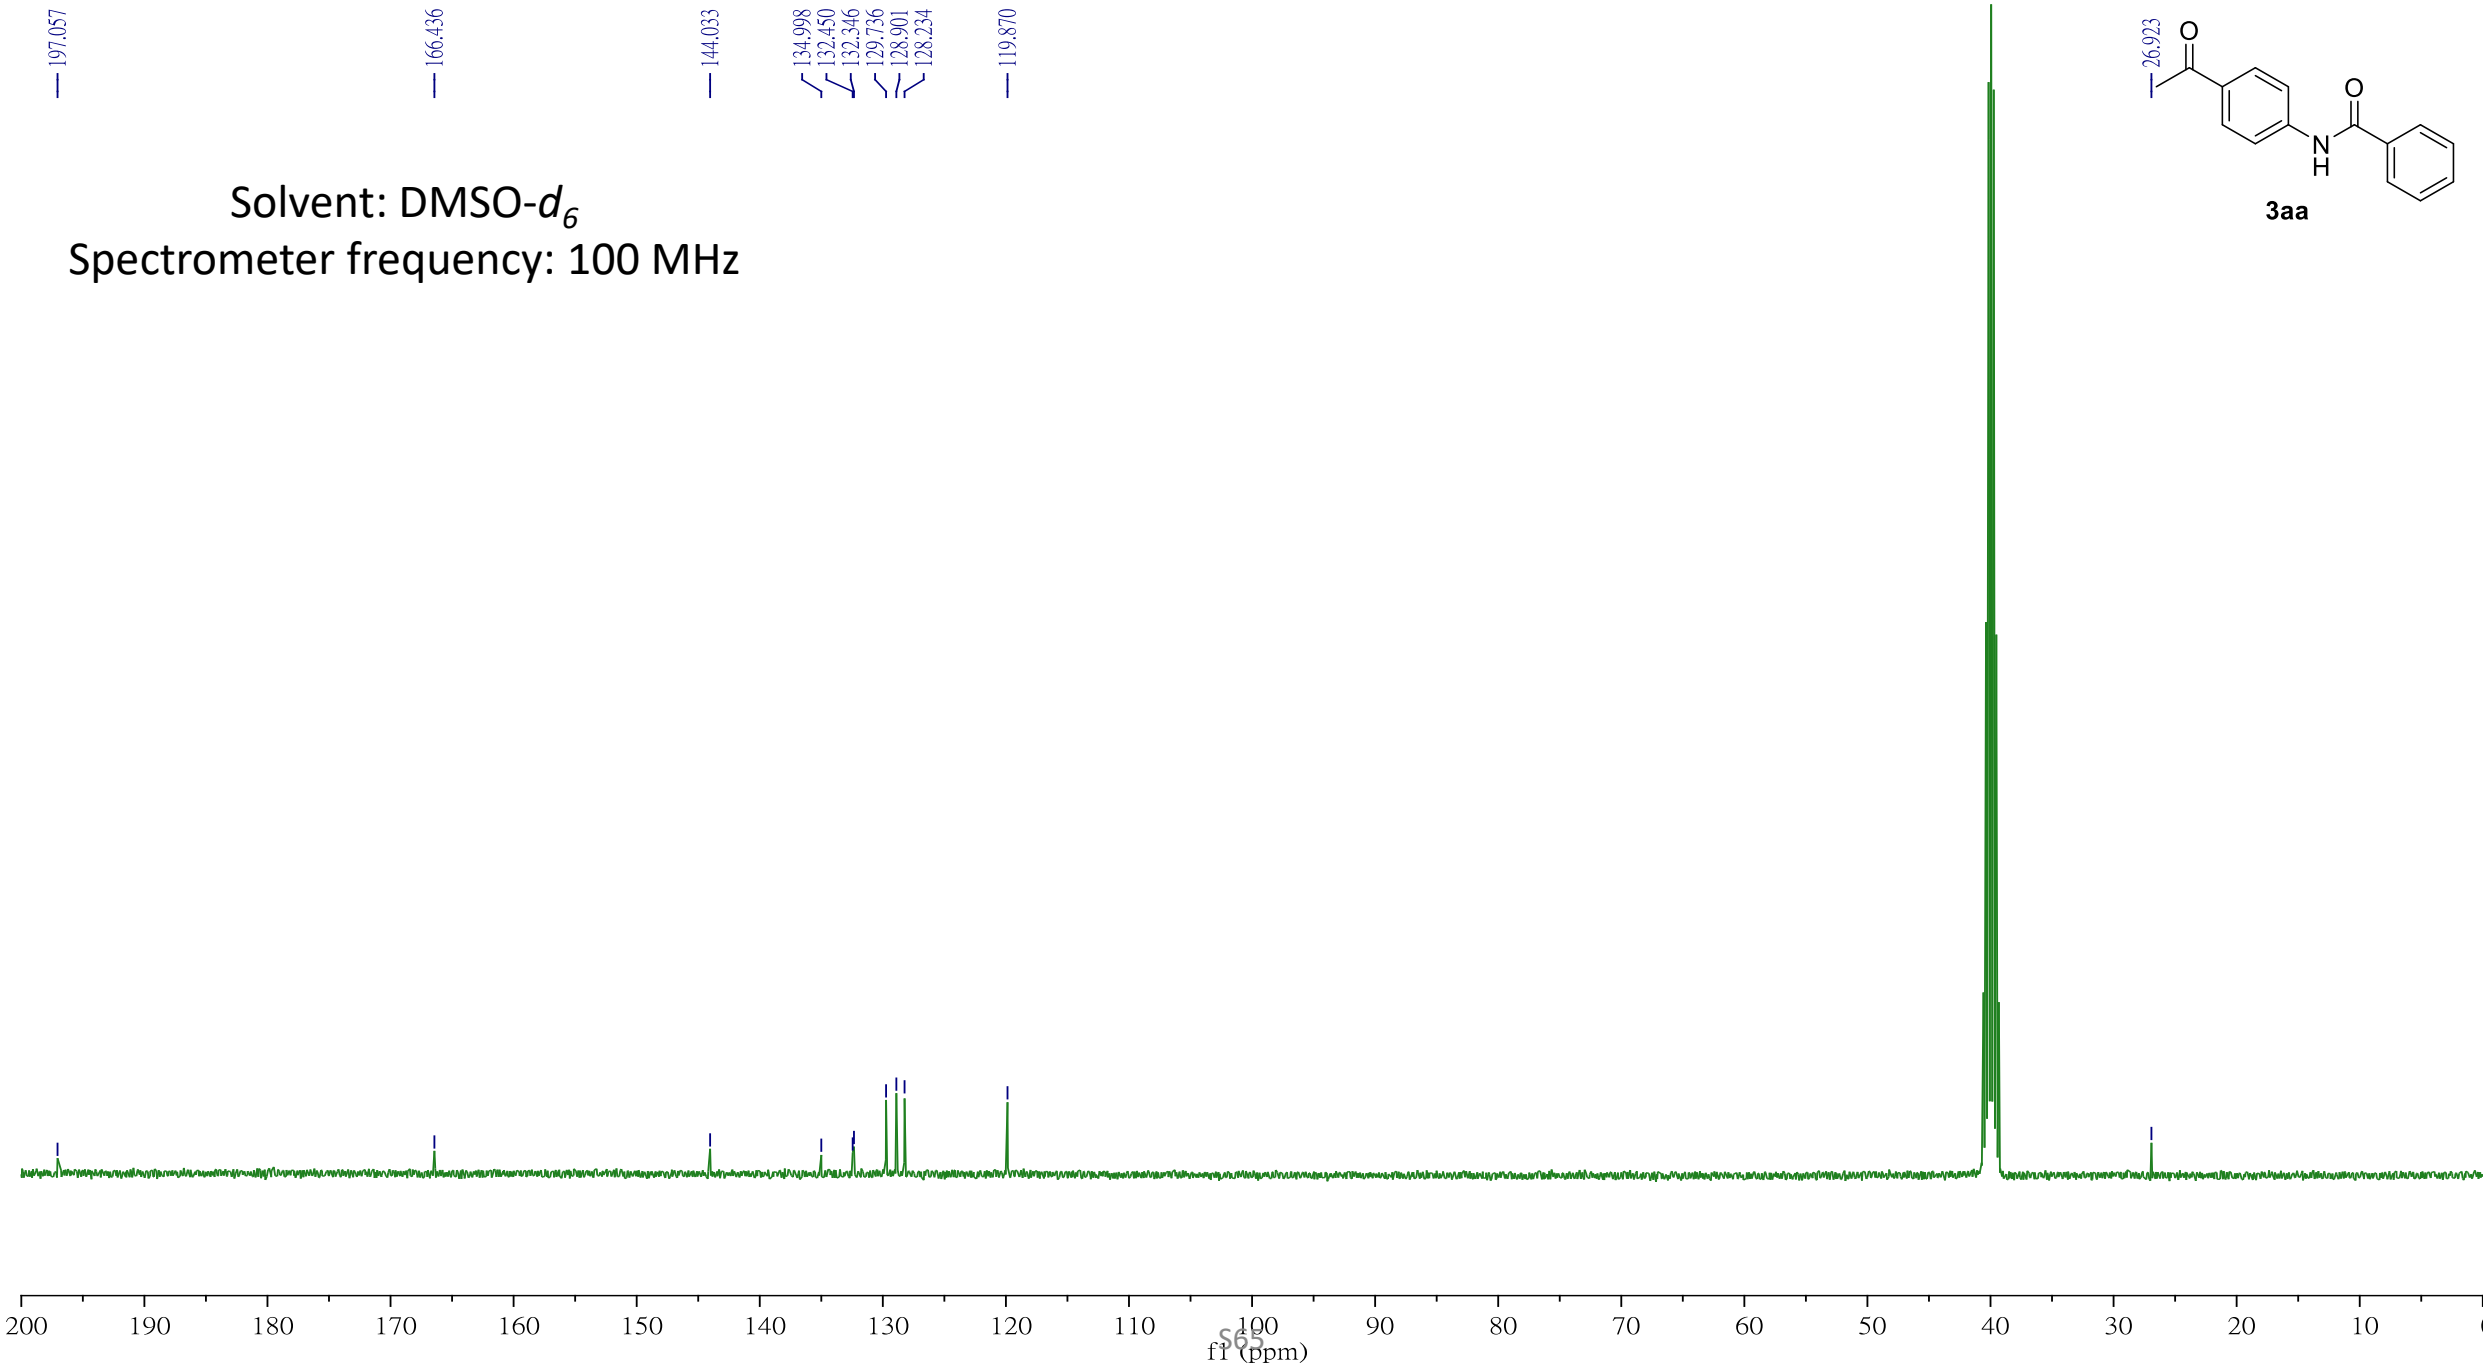

Solvent: DMSO- $d_6$   
Spectrometer frequency: 400 MHz

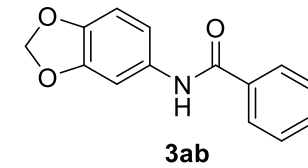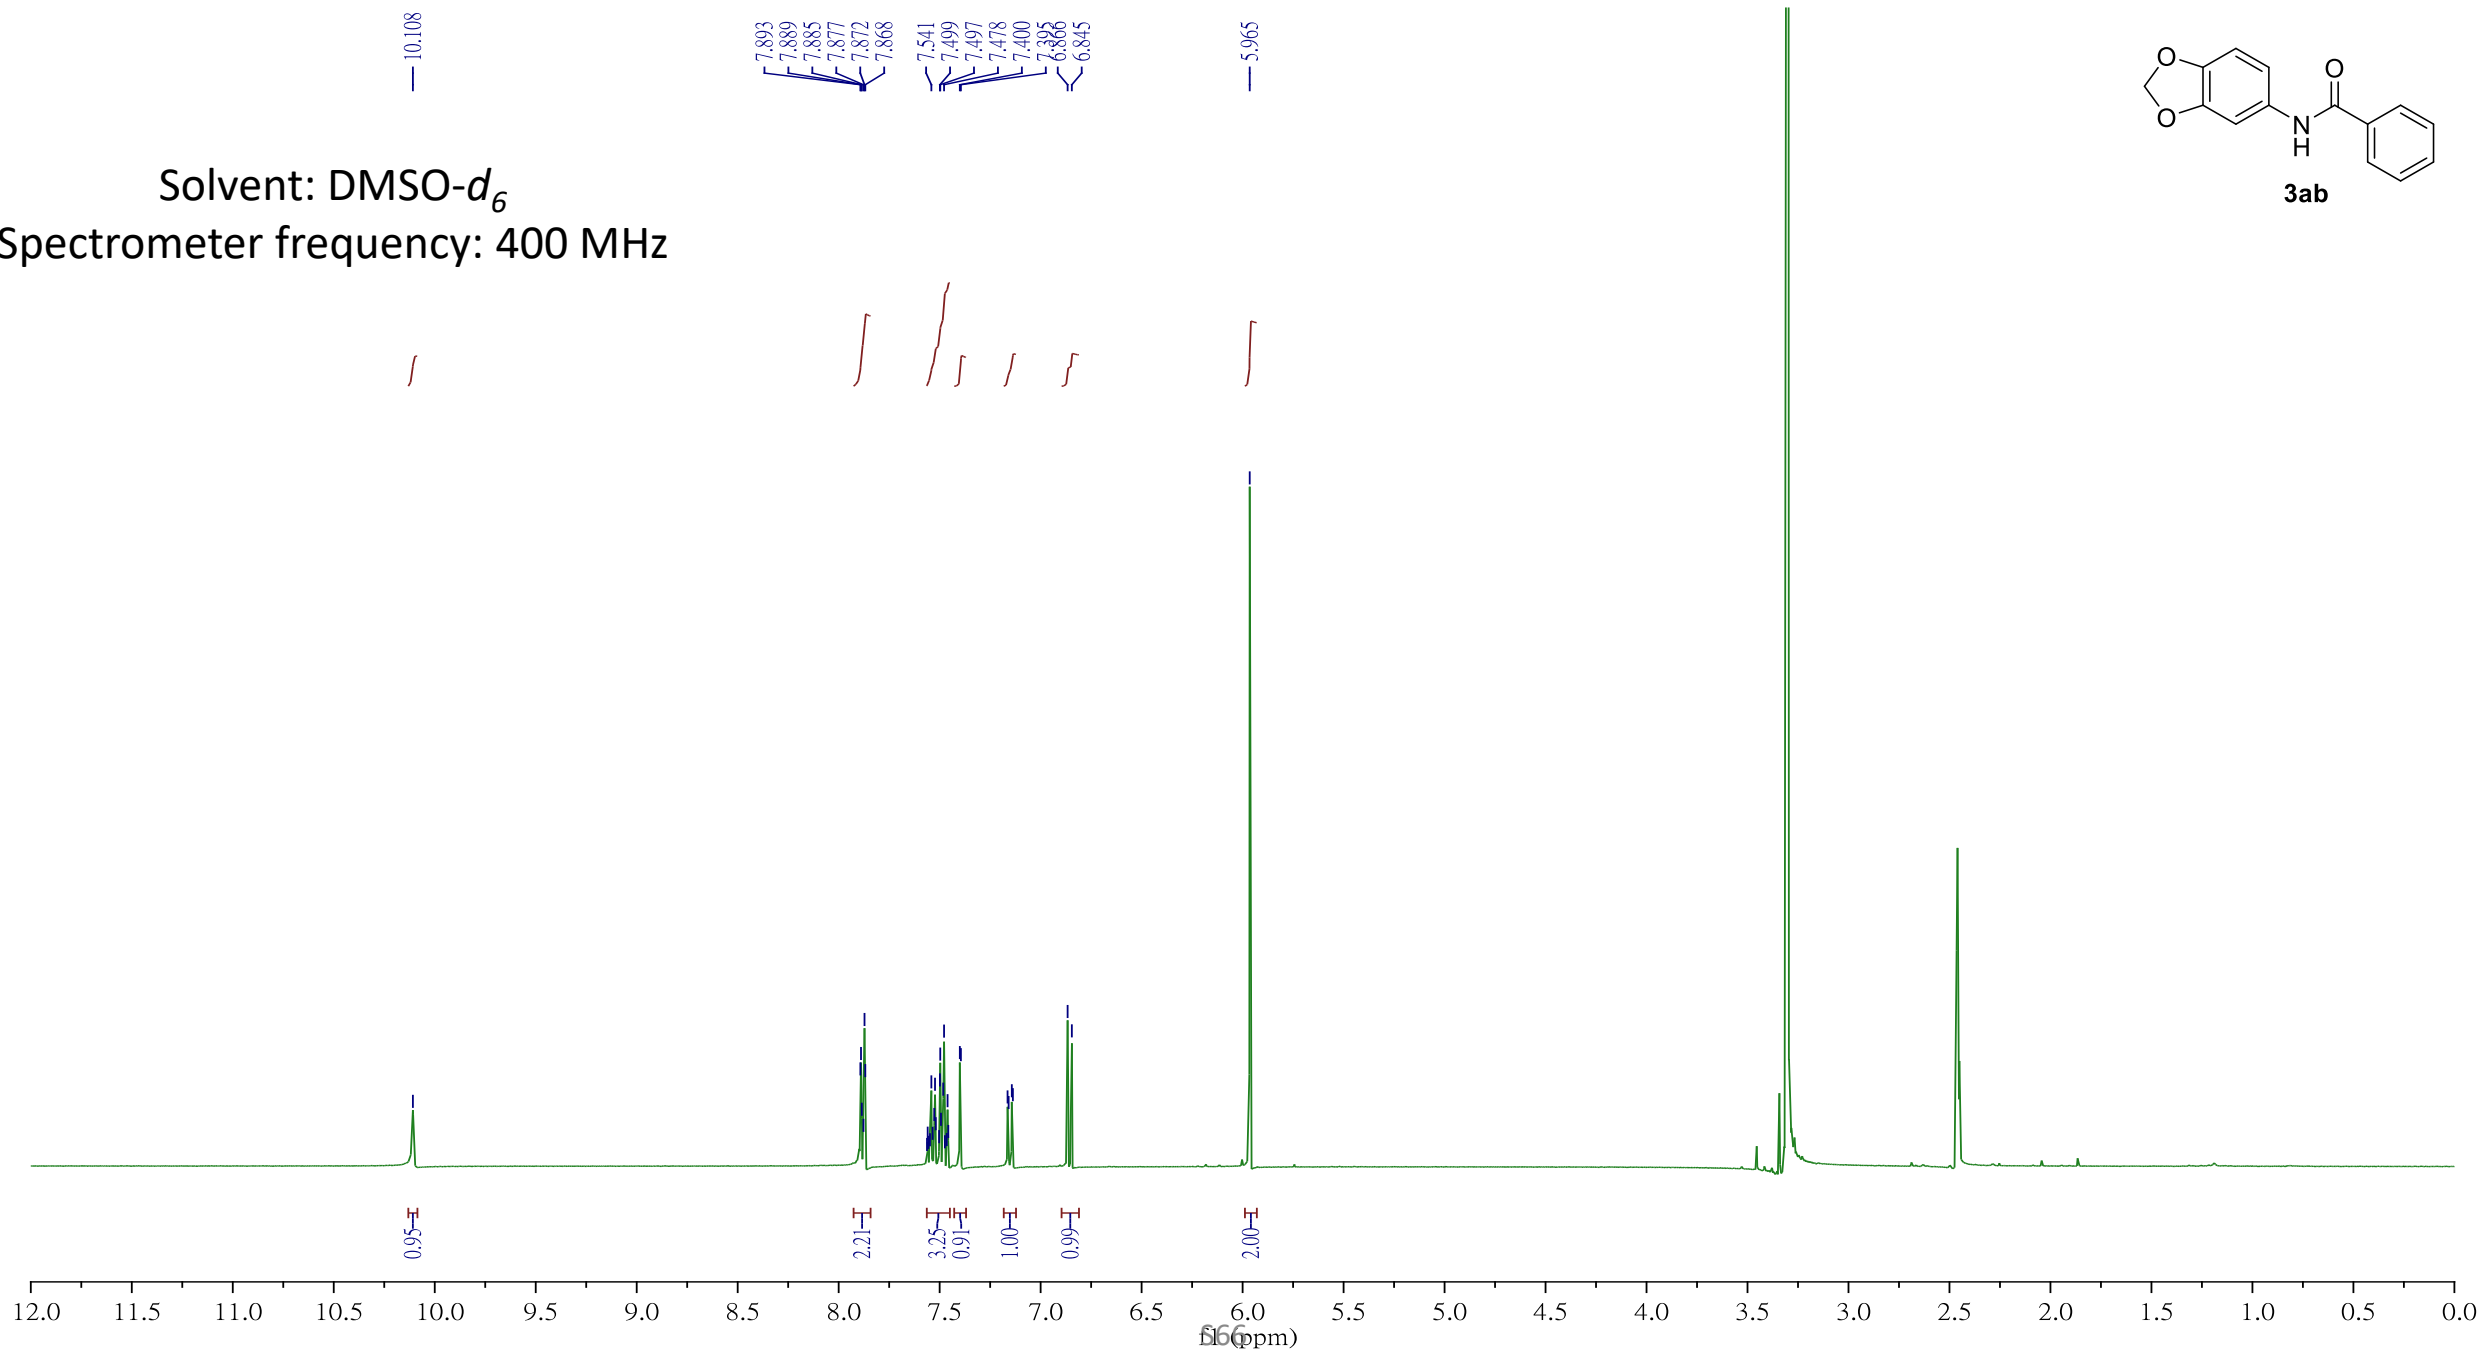

Solvent: DMSO- $d_6$   
Spectrometer frequency: 100 MHz

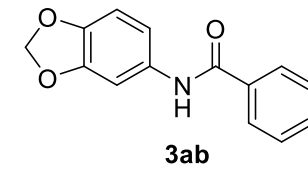

165.773

147.478

143.758

135.462

133.986

132.001

128.899

128.074

113.869

108.446

103.014

101.518

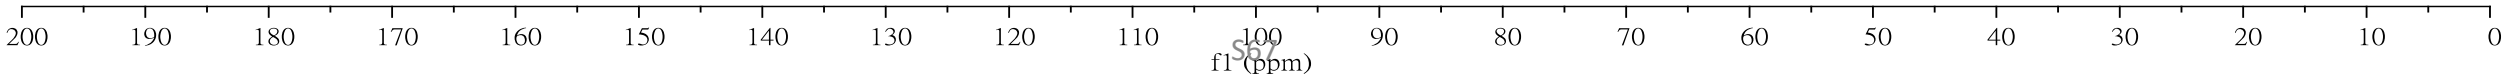

M0570-14  
NQ-5-115

7.9572  
7.9558  
7.9521  
7.9425  
7.9385  
7.9349  
7.9336  
7.8391  
7.8306  
7.8260  
7.8142  
7.8088  
7.8013  
7.6195  
7.6076  
7.6004  
7.5953  
7.5855  
7.5830  
7.5795  
7.5536  
7.5382  
7.5341  
7.5209  
7.5170  
7.4277  
7.4196  
7.4149  
7.4031  
7.3977  
7.3901

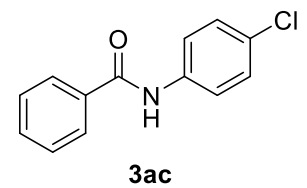

Solvent: DMSO- $d_6$   
Spectrometer frequency: 400 MHz

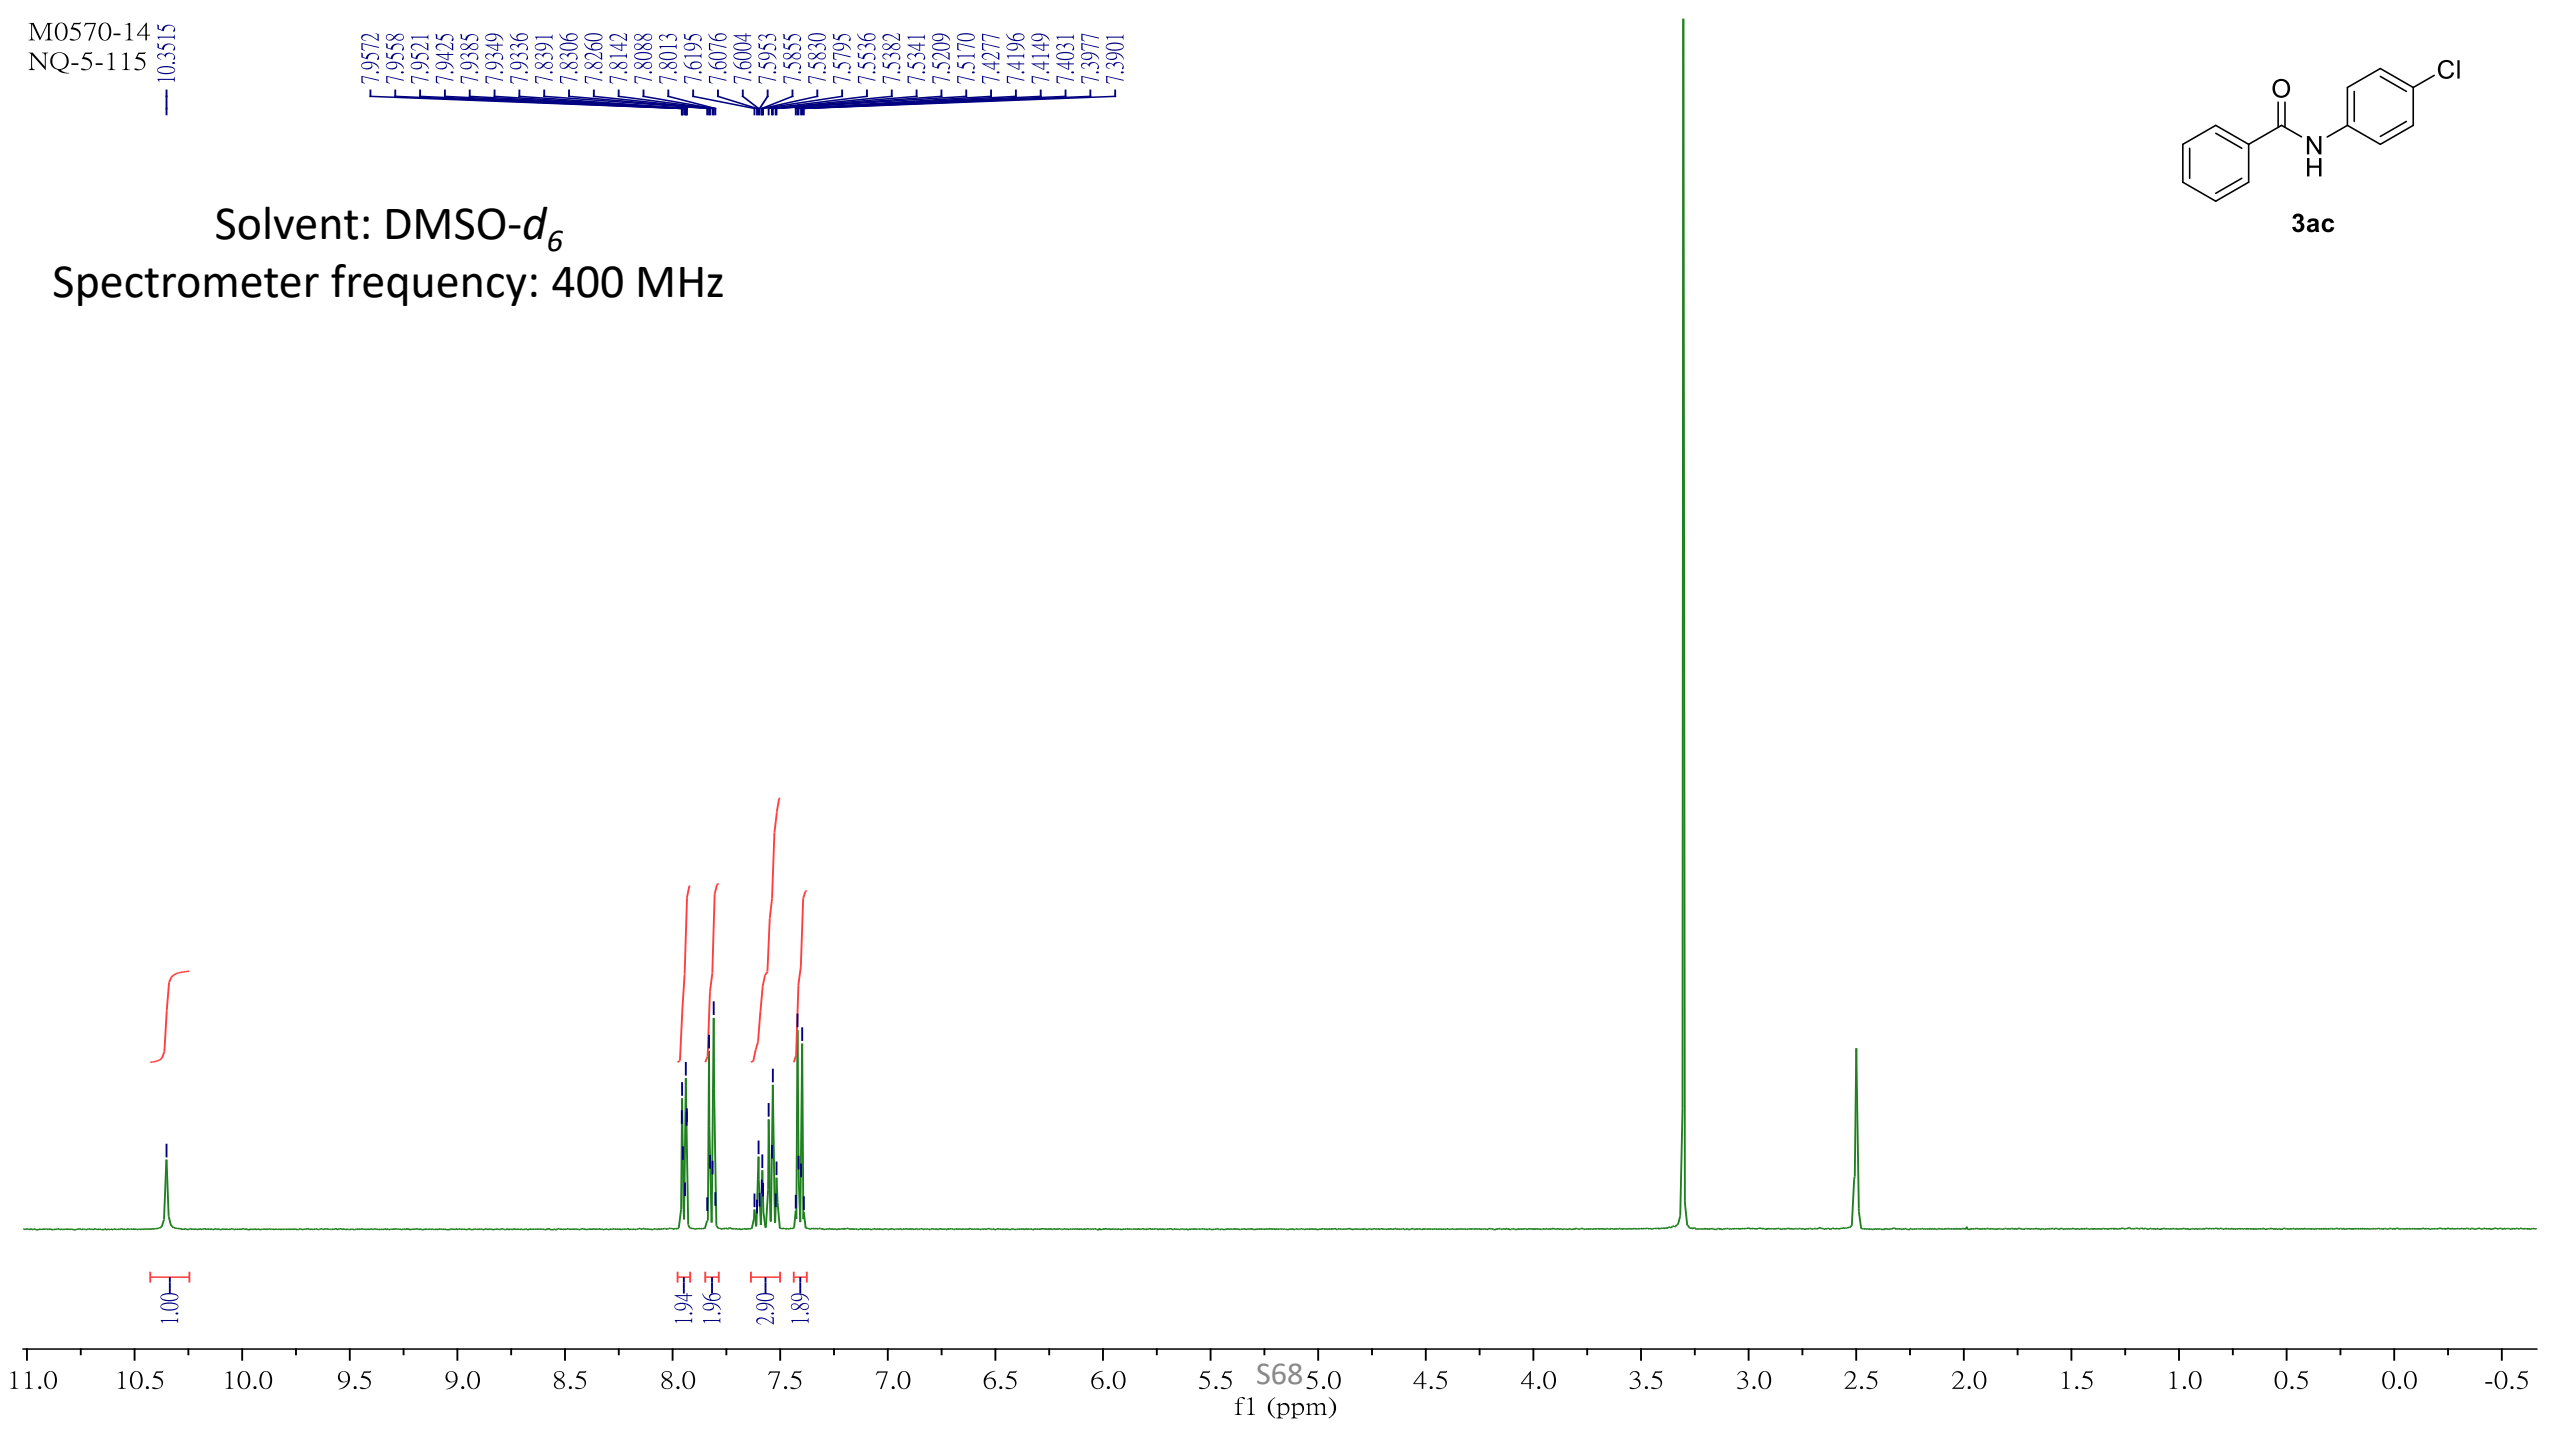

M0570-25  
nq-5-115

166.08  
138.59  
135.15  
132.14  
128.95  
128.85  
128.10  
127.69  
122.28

Solvent: DMSO-*d*<sub>6</sub>  
Spectrometer frequency: 100 MHz

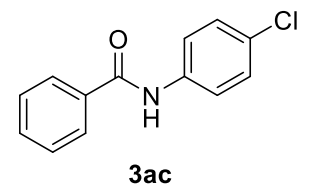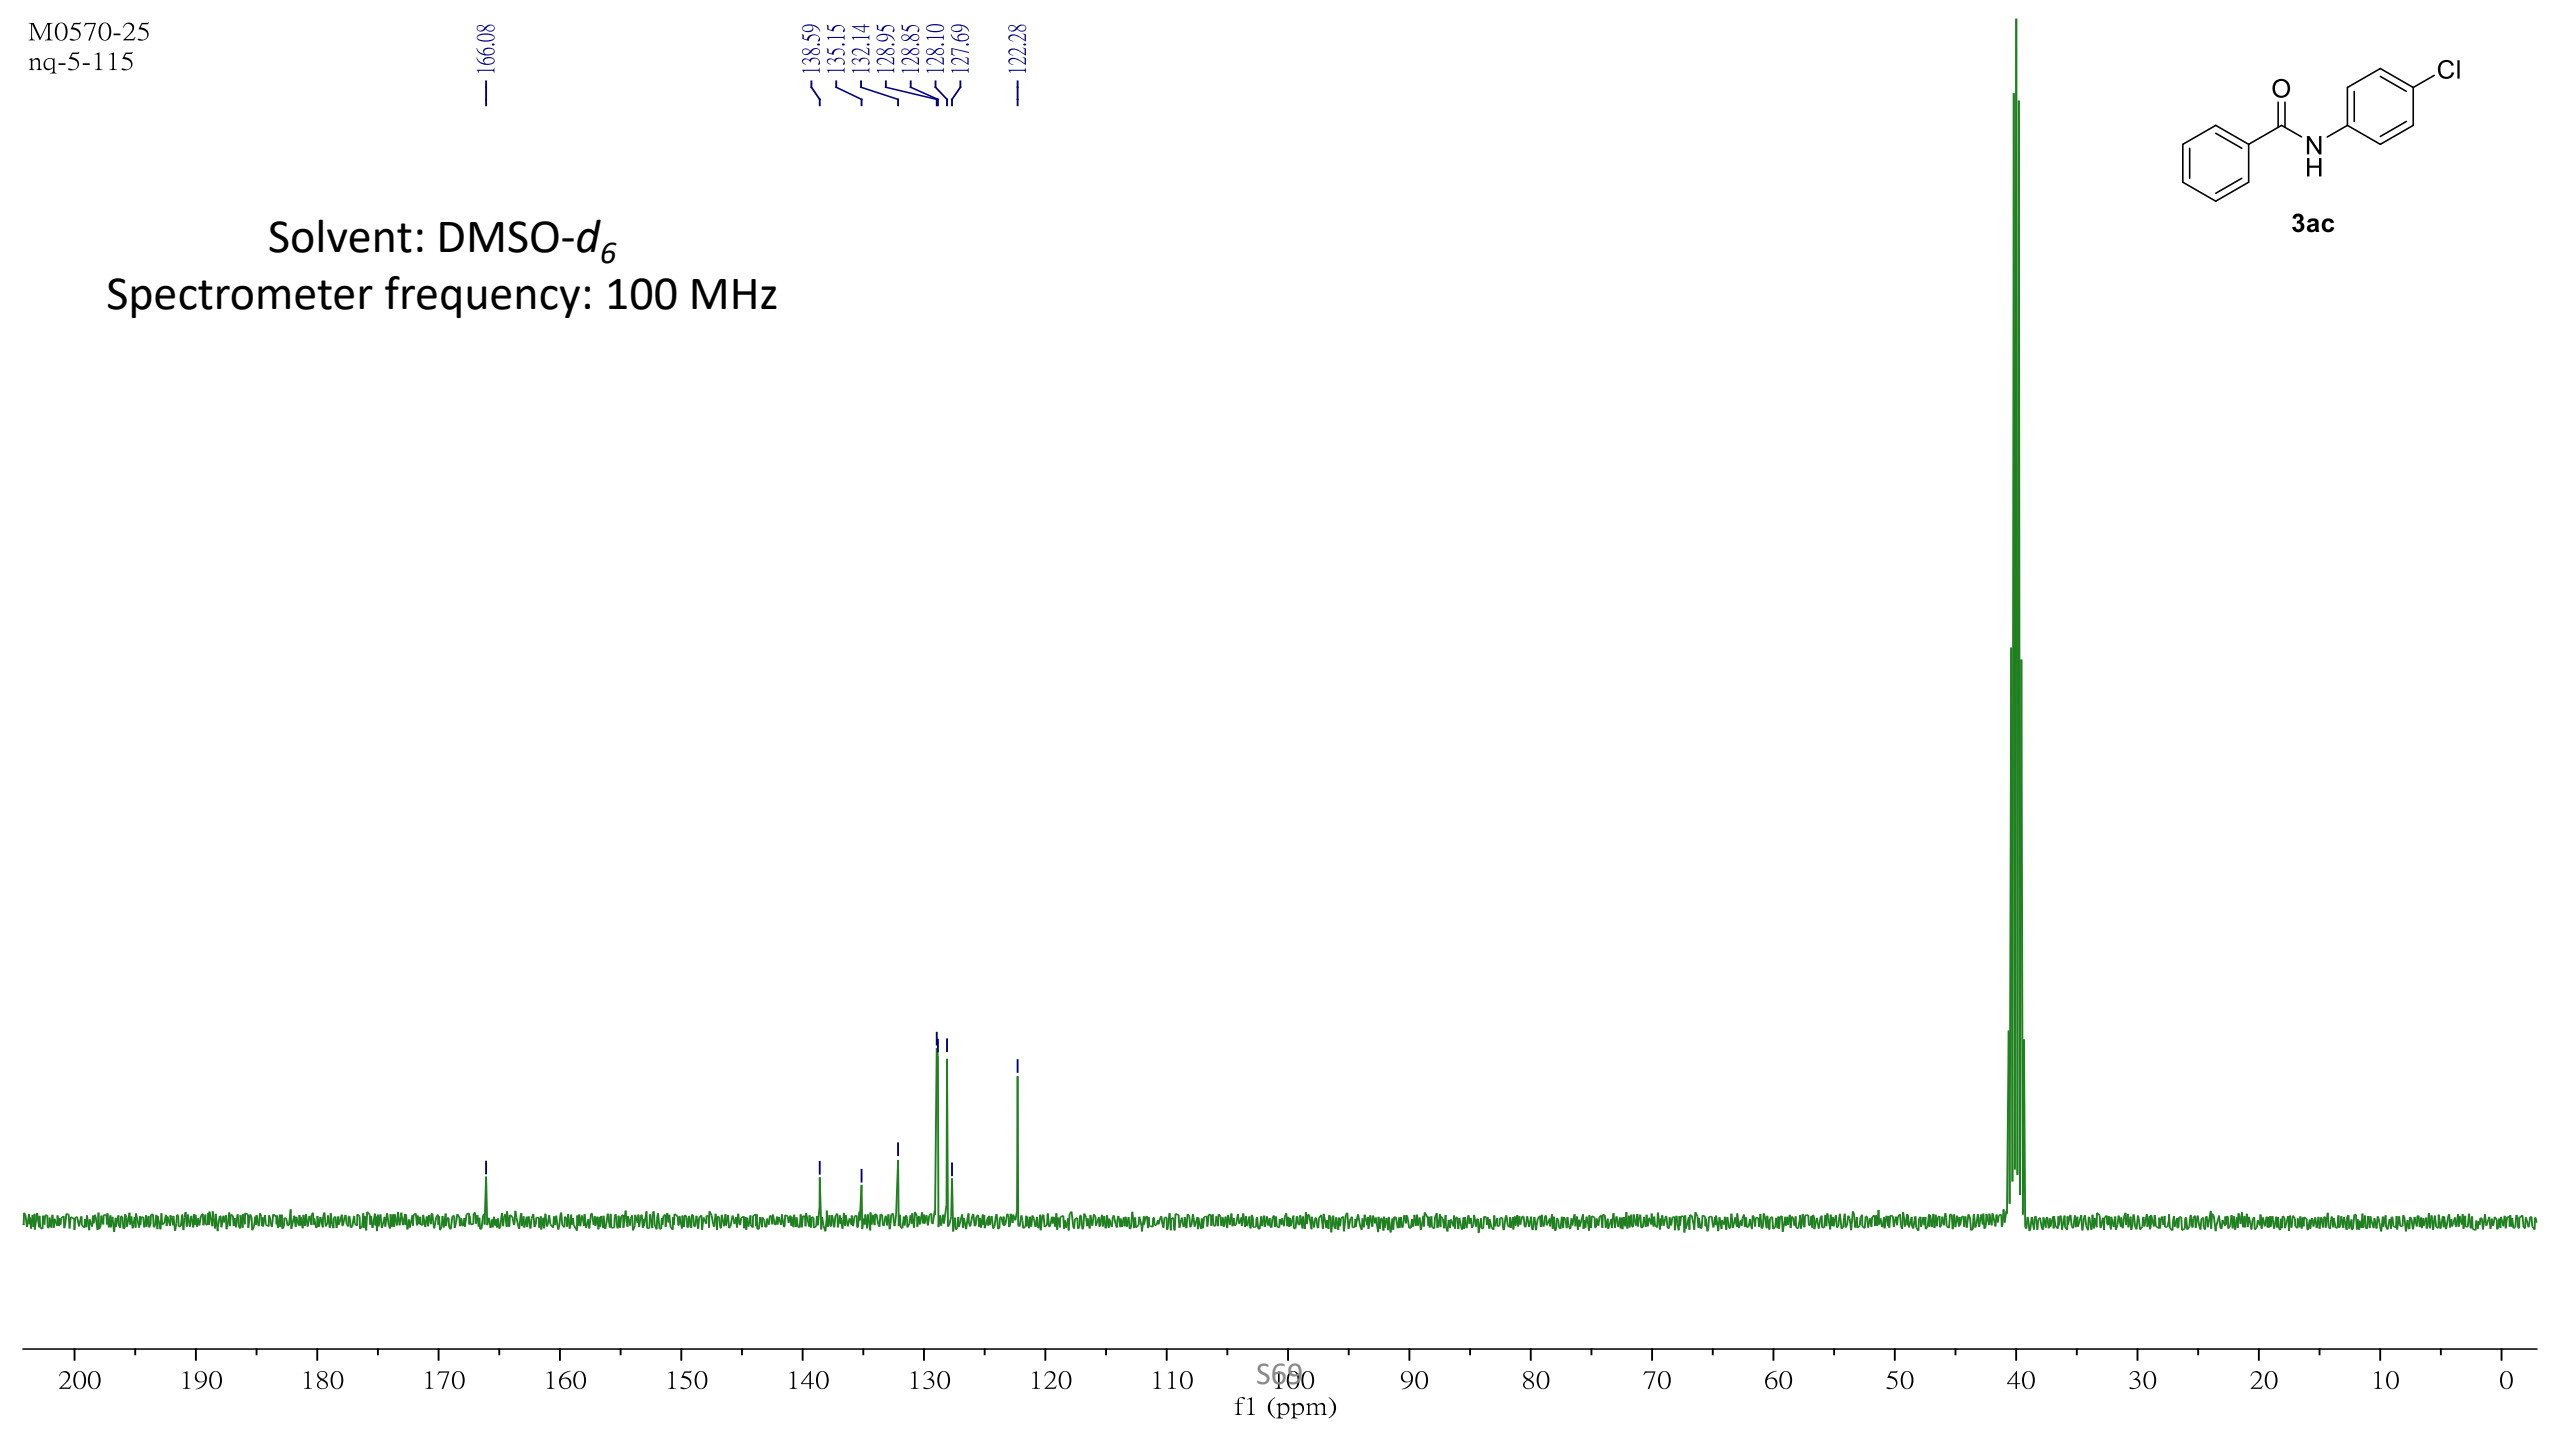

M0570-15  
NQ-5-114-1

10.3485

7.9589  
7.9570  
7.9558  
7.9538  
7.9438  
7.9386  
7.9349  
7.7818  
7.7777  
7.7647  
7.7595  
7.6216  
7.6183  
7.6150  
7.6066  
7.6001  
7.5943  
7.5854  
7.5819  
7.5784  
7.5517  
7.5468  
7.5418  
7.5367  
7.5328  
7.5246  
7.5201  
7.5154  
7.5120

Solvent: DMSO- $d_6$   
Spectrometer frequency: 400 MHz

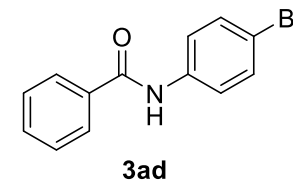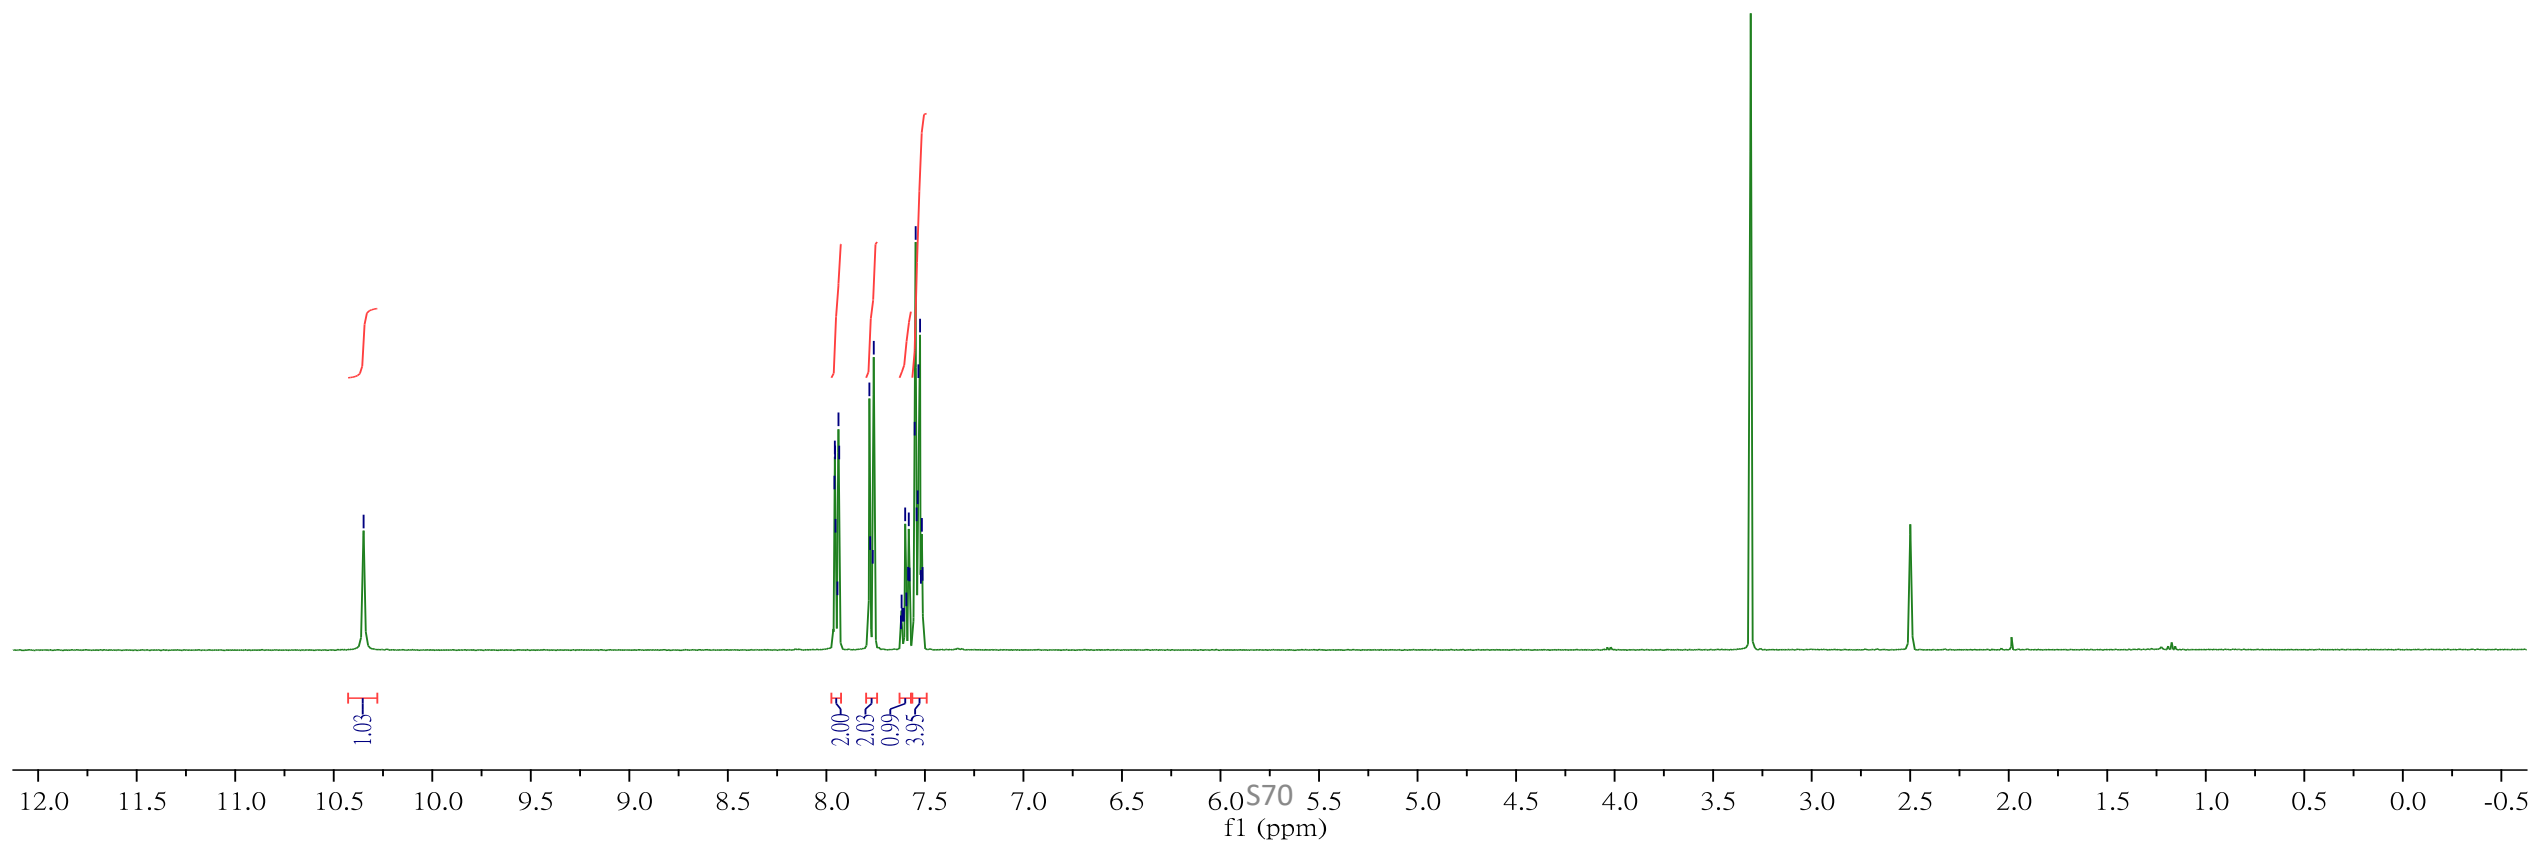

M0570-23  
NQ-5-114-1

166.09

139.01

135.13

132.15

131.87

128.86

128.11

122.63

115.75

Solvent: DMSO- $d_6$   
Spectrometer frequency: 100 MHz

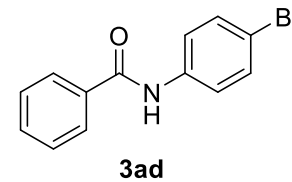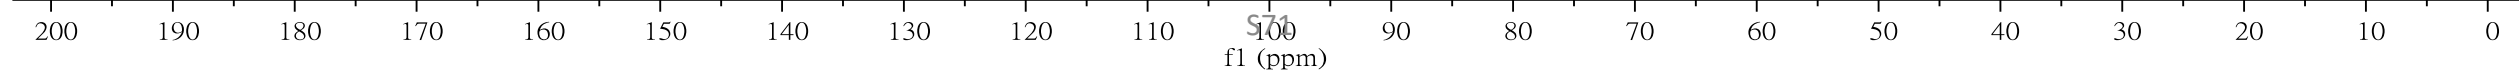



M0570-16  
NQ-5-114-2

10.0905  
7.9484  
7.9454  
7.9414  
7.9335  
7.9282  
7.9243  
7.6657  
7.6602  
7.6487  
7.6431  
7.5743  
7.5682  
7.5600  
7.5564  
7.5527  
7.5350  
7.5332  
7.5298  
7.5187  
7.5147  
7.4973  
7.4936  
6.9189  
6.9133  
6.9018  
6.8962  
6.8877

4.0342  
4.0168  
3.9994  
3.9820

1.3388  
1.3215  
1.3040

Solvent: DMSO- $d_6$   
Spectrometer frequency: 400 MHz

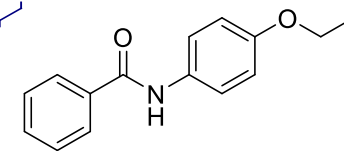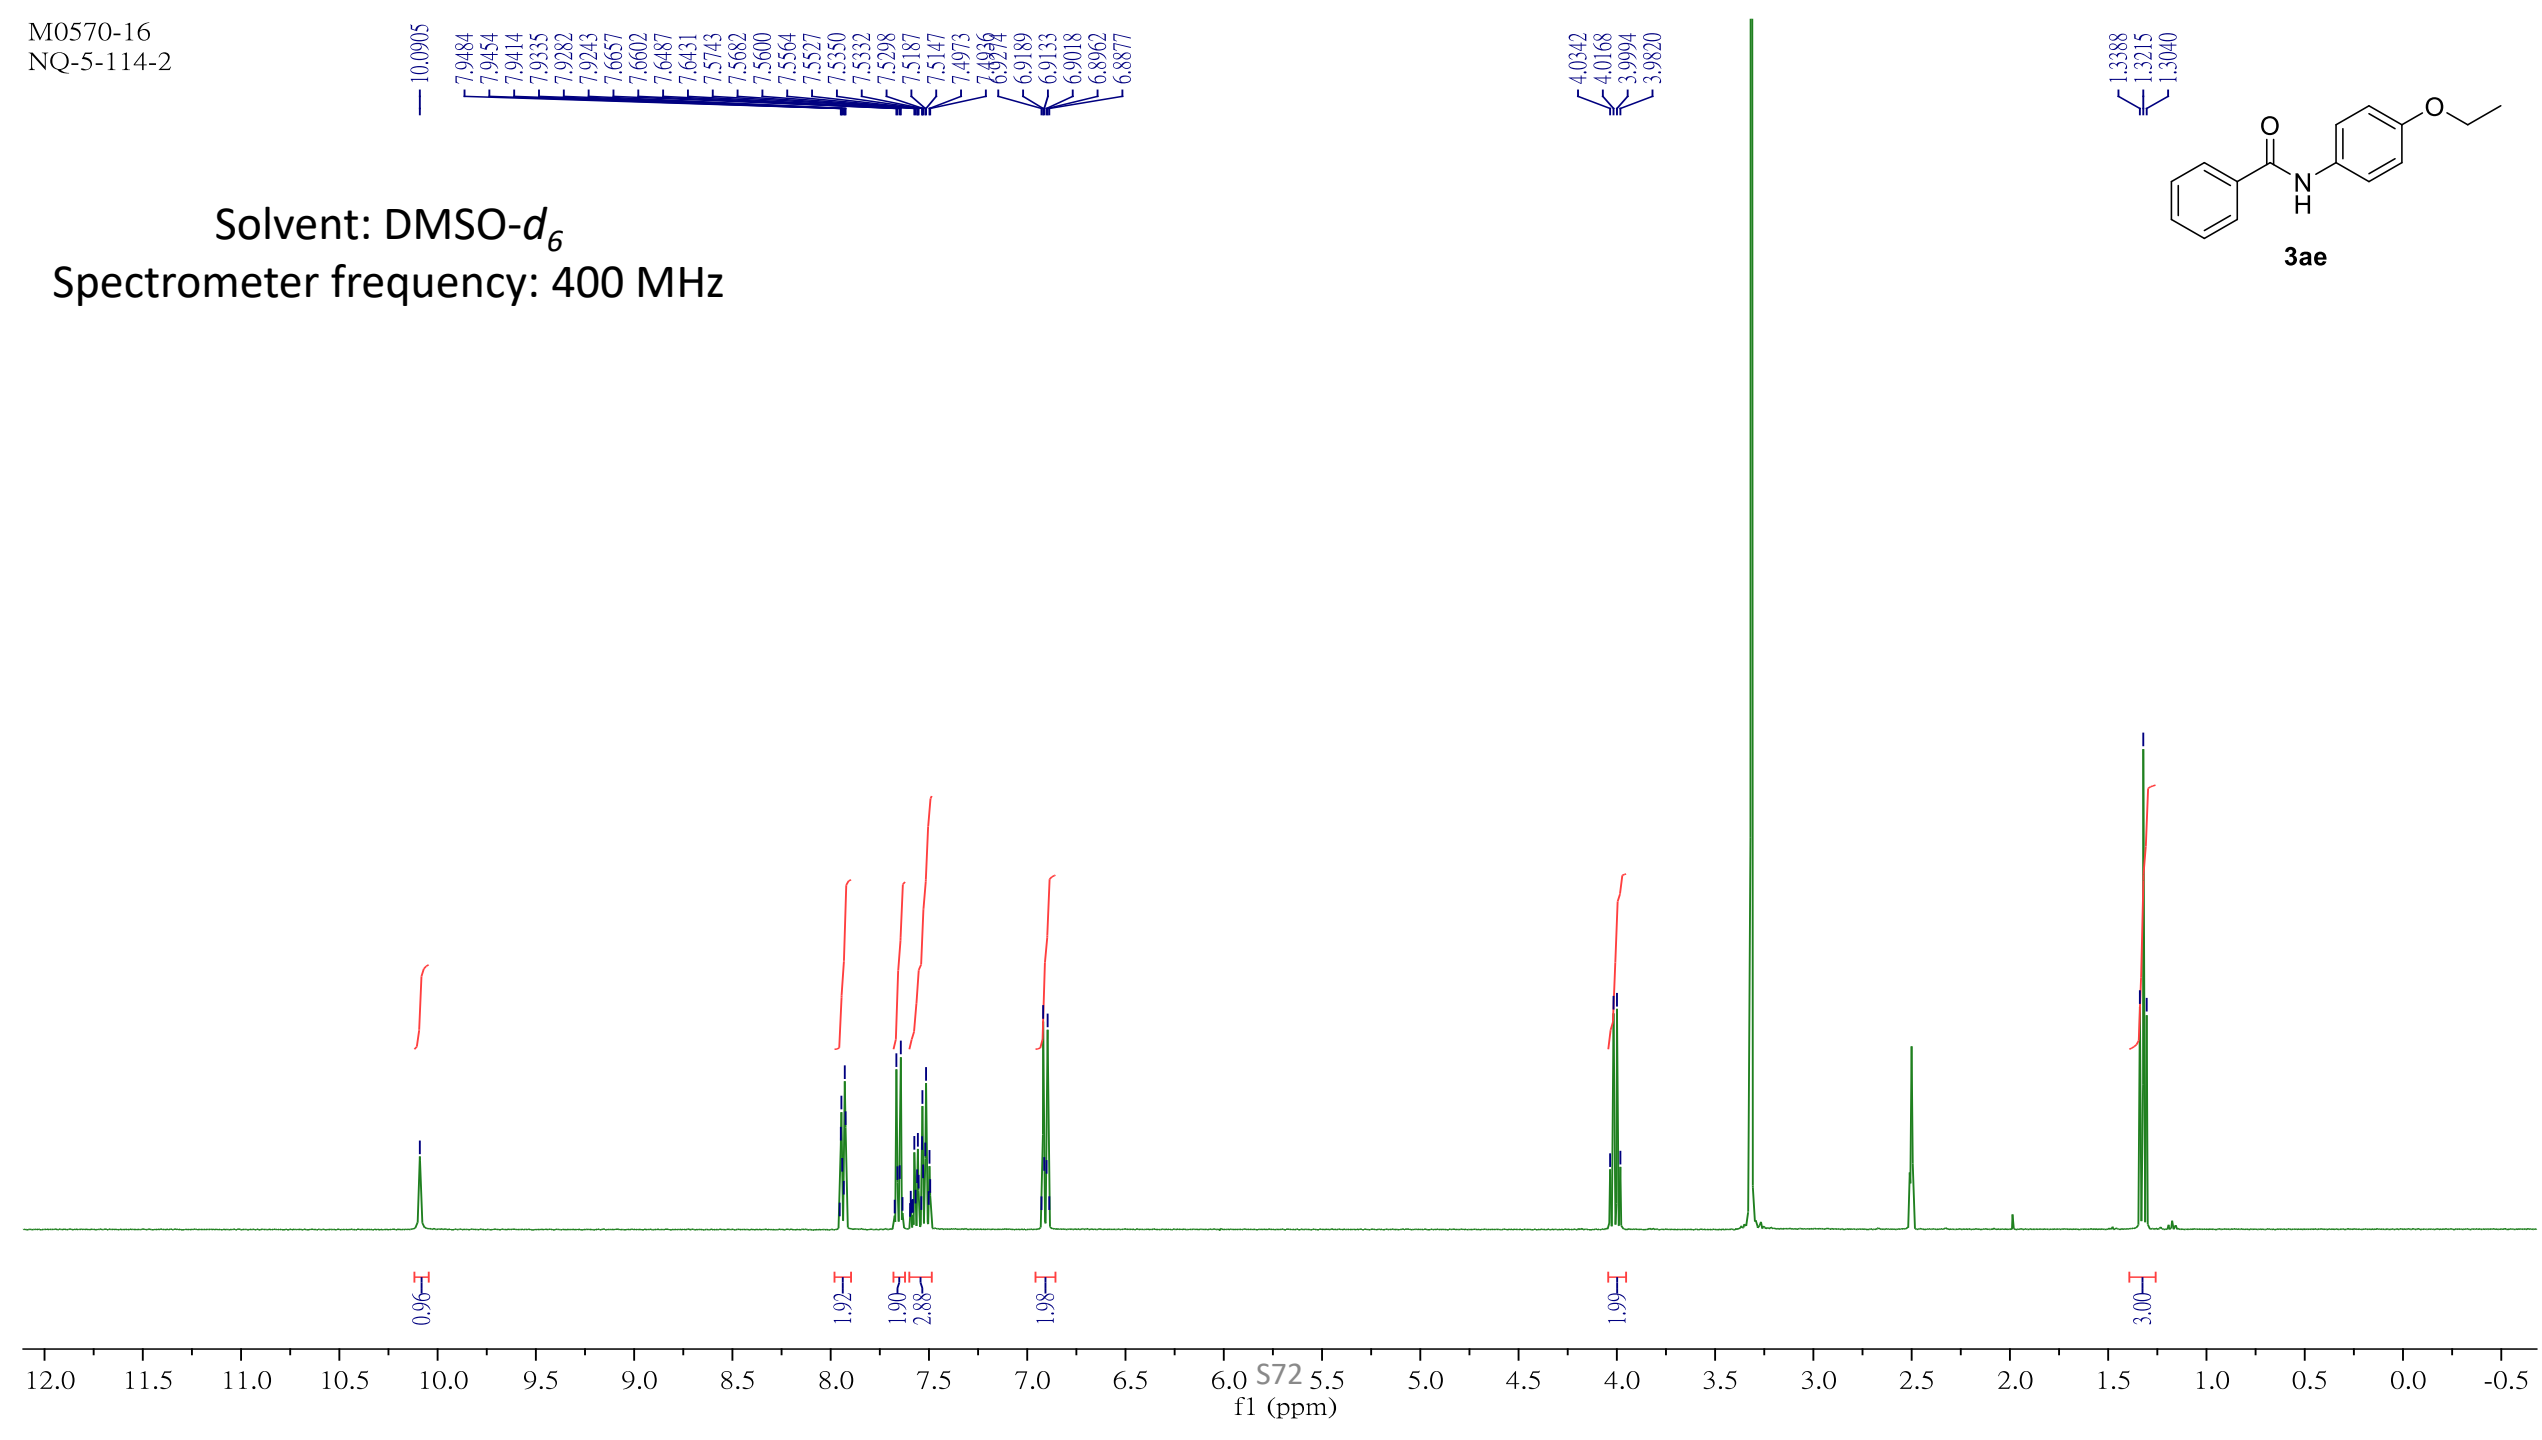

M0570-22  
NQ-5-114-2

165.52

155.23

135.49

132.54

131.79

128.78

127.96

122.39

114.68

63.52

Solvent: DMSO- $d_6$   
Spectrometer frequency: 100 MHz

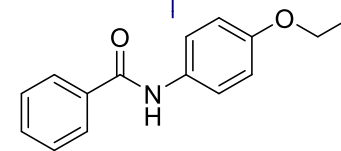

15.15

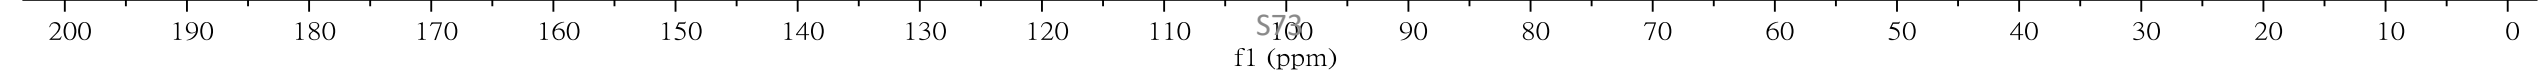

MO602-3  
NQ-5-131-3

10.0197

7.8609  
7.8401  
7.6543  
7.6320  
7.5200  
7.4993  
6.9184  
6.9101  
6.9054  
6.8932  
6.8879  
6.8794

3.7229

1.2000

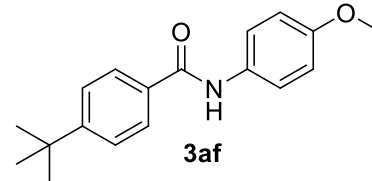

Solvent: DMSO- $d_6$   
Spectrometer frequency: 400 MHz

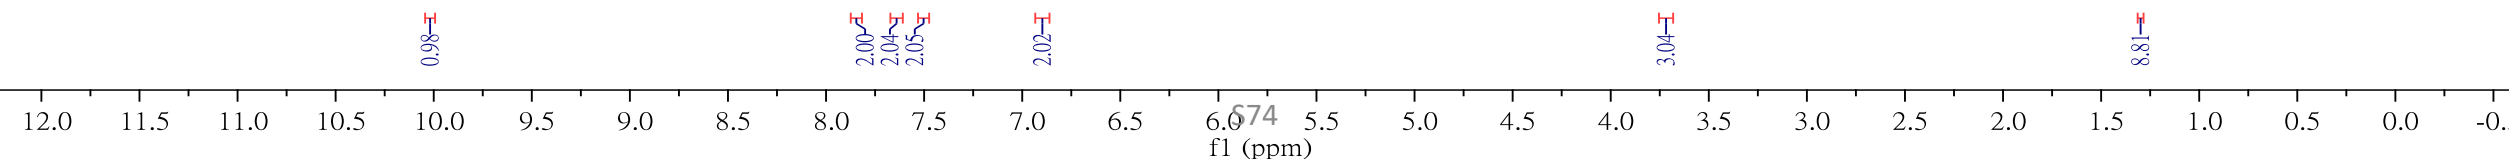

6.74  
f1 (ppm)

M0606-8  
nq-5-131-3

165.4765

155.8787  
154.6185

132.7731

132.7524

127.8237

125.5377

122.3055

114.1404

55.6094

35.0942

31.3904

Solvent: DMSO- $d_6$   
Spectrometer frequency: 100 MHz

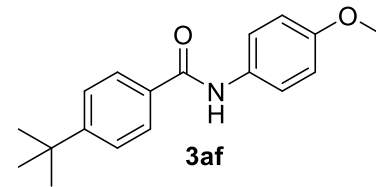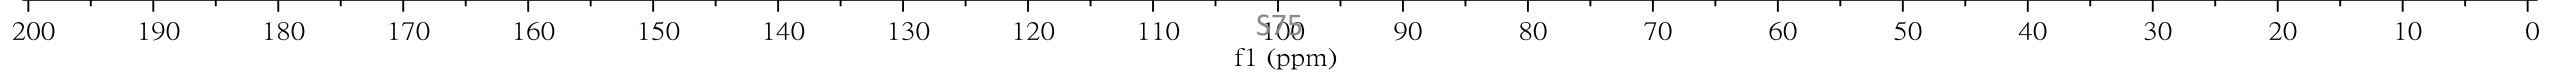

MO602-1  
NQ-5-131-1

10.0784

7.8813  
7.8607  
7.6556  
7.6350  
7.5414  
7.5207  
7.1540  
7.1335

2.2747

1.3179

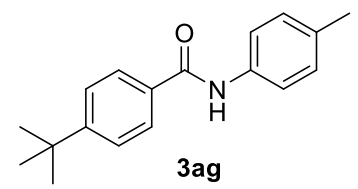

Solvent: DMSO- $d_6$   
Spectrometer frequency: 400 MHz

12.0 11.5 11.0 10.5 10.0 9.5 9.0 8.5 8.0 7.5 7.0 6.5 6.0 5.5 5.0 4.5 4.0 3.5 3.0 2.5 2.0 1.5 1.0 0.5 0.0 -0.5

0.87

1.95

1.98

2.00

1.97

6.76

2.98

9.15

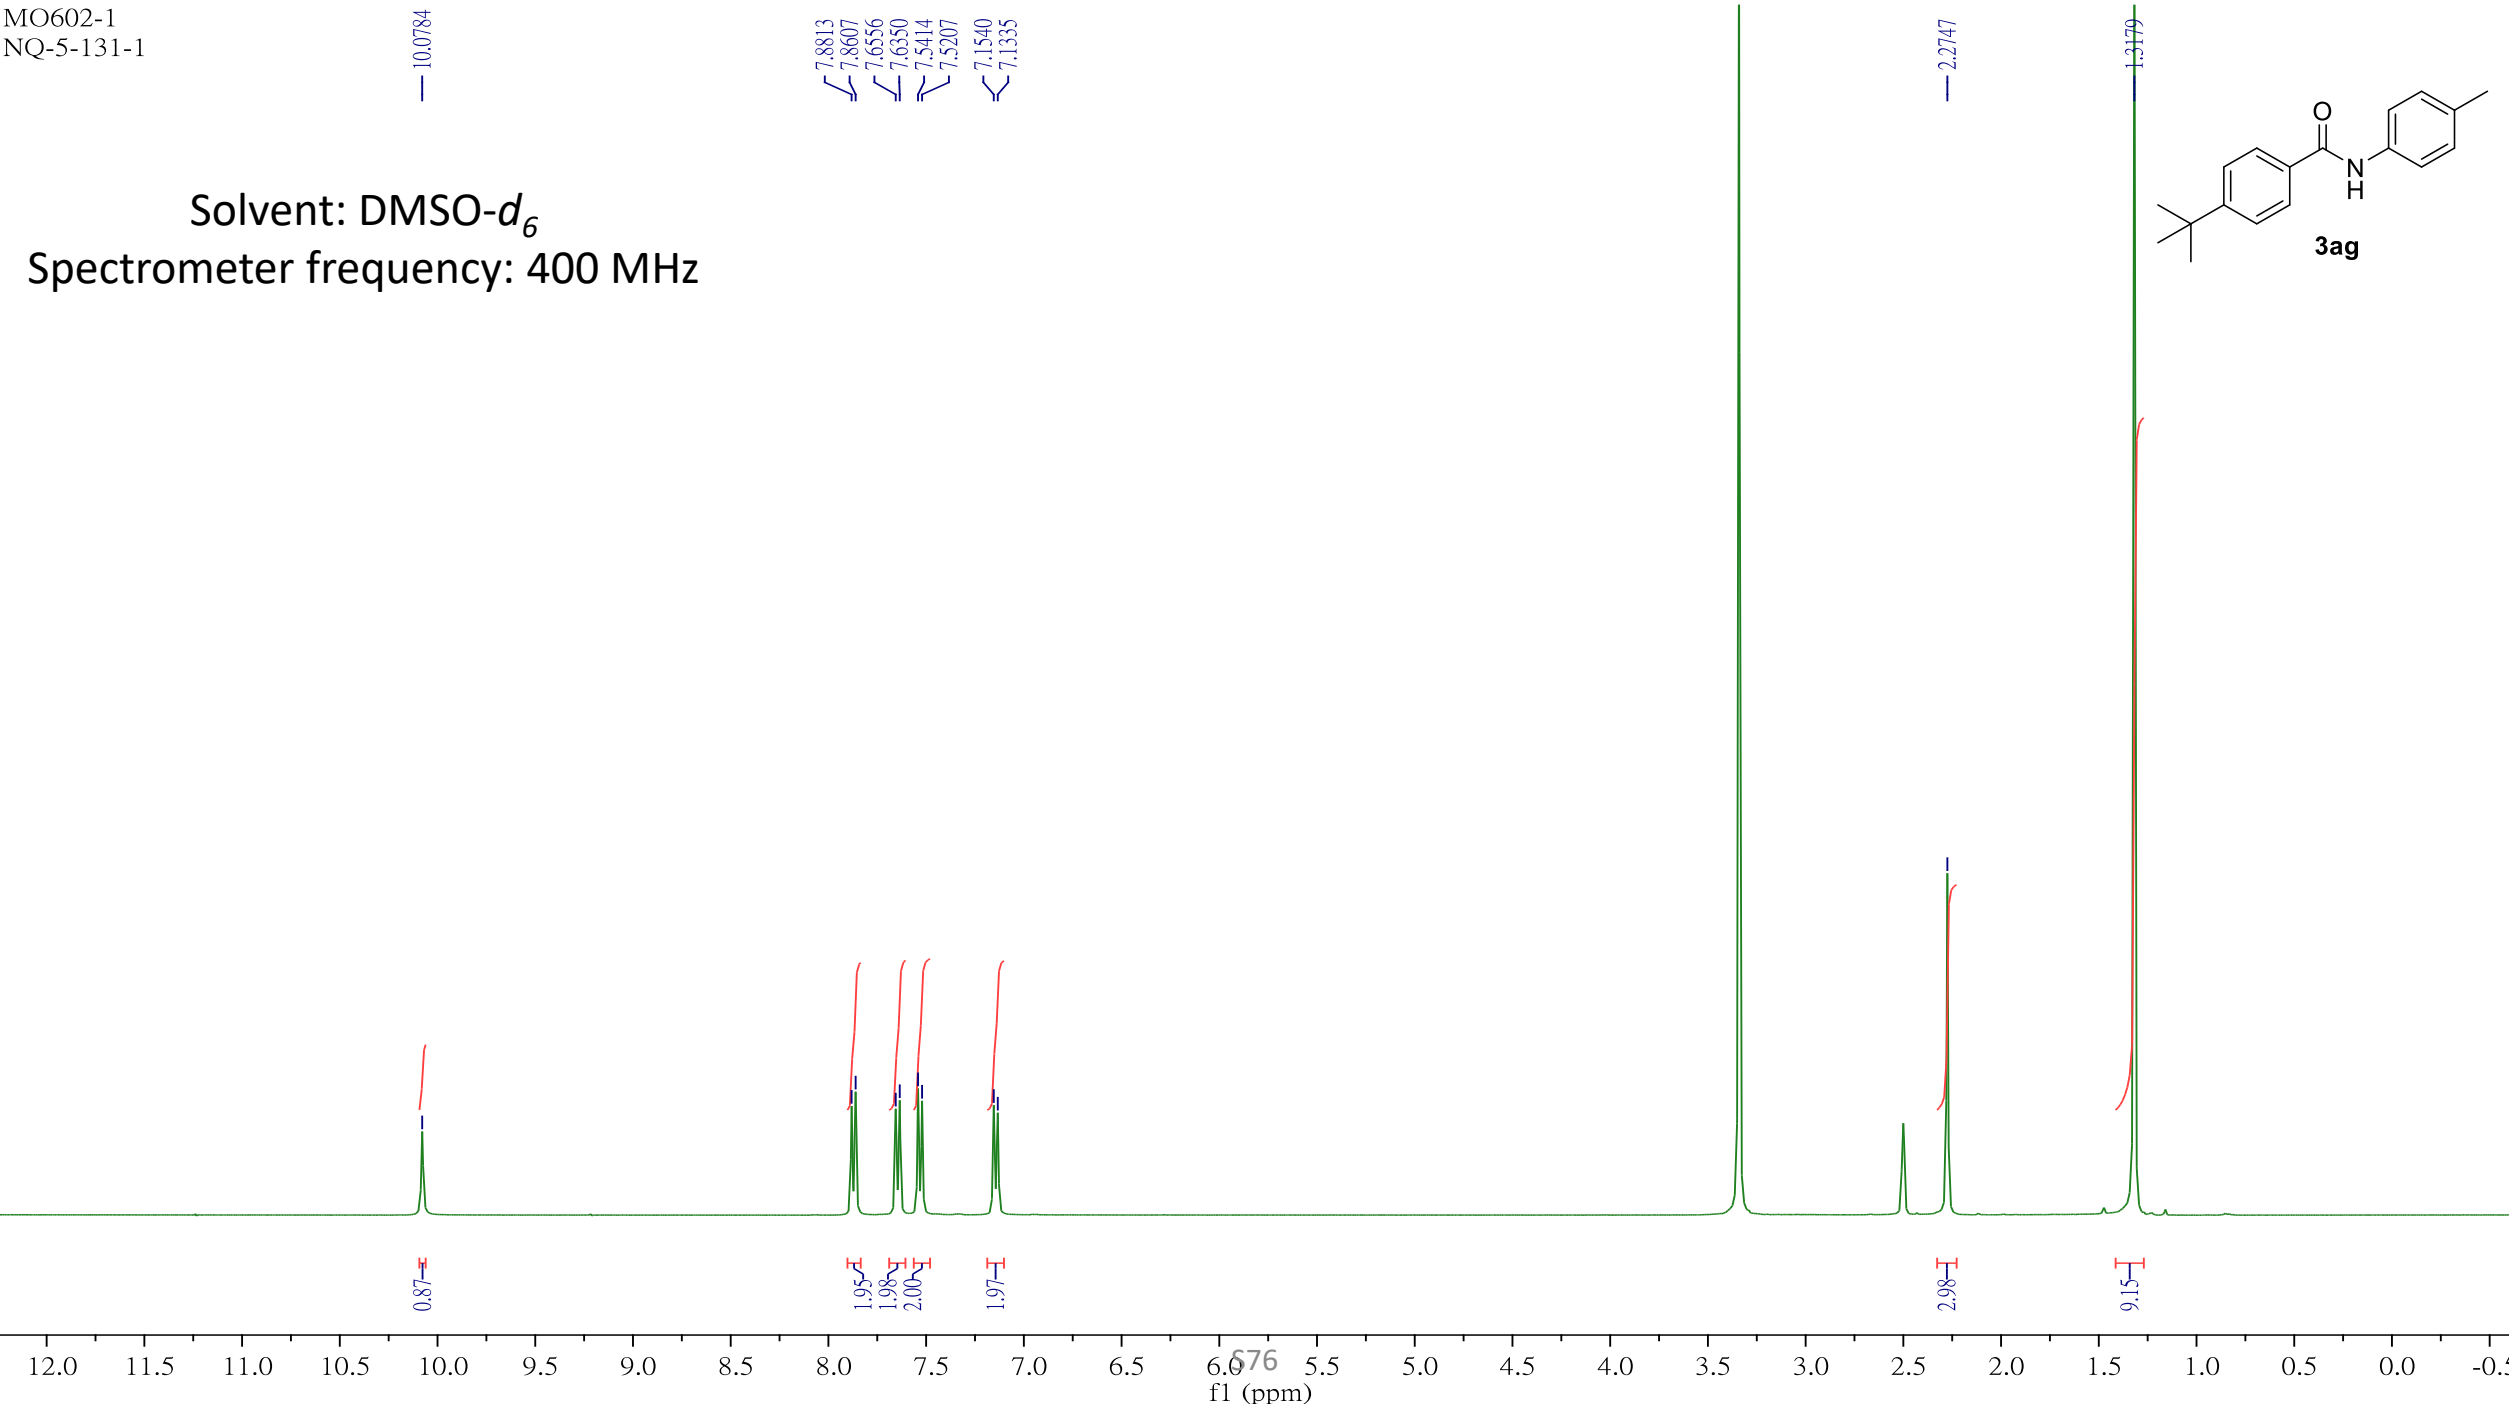

M0606-2  
nq-5-131-1

Solvent: DMSO-*d*<sub>6</sub>  
Spectrometer frequency: 100 MHz

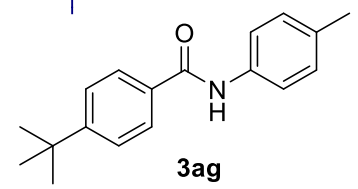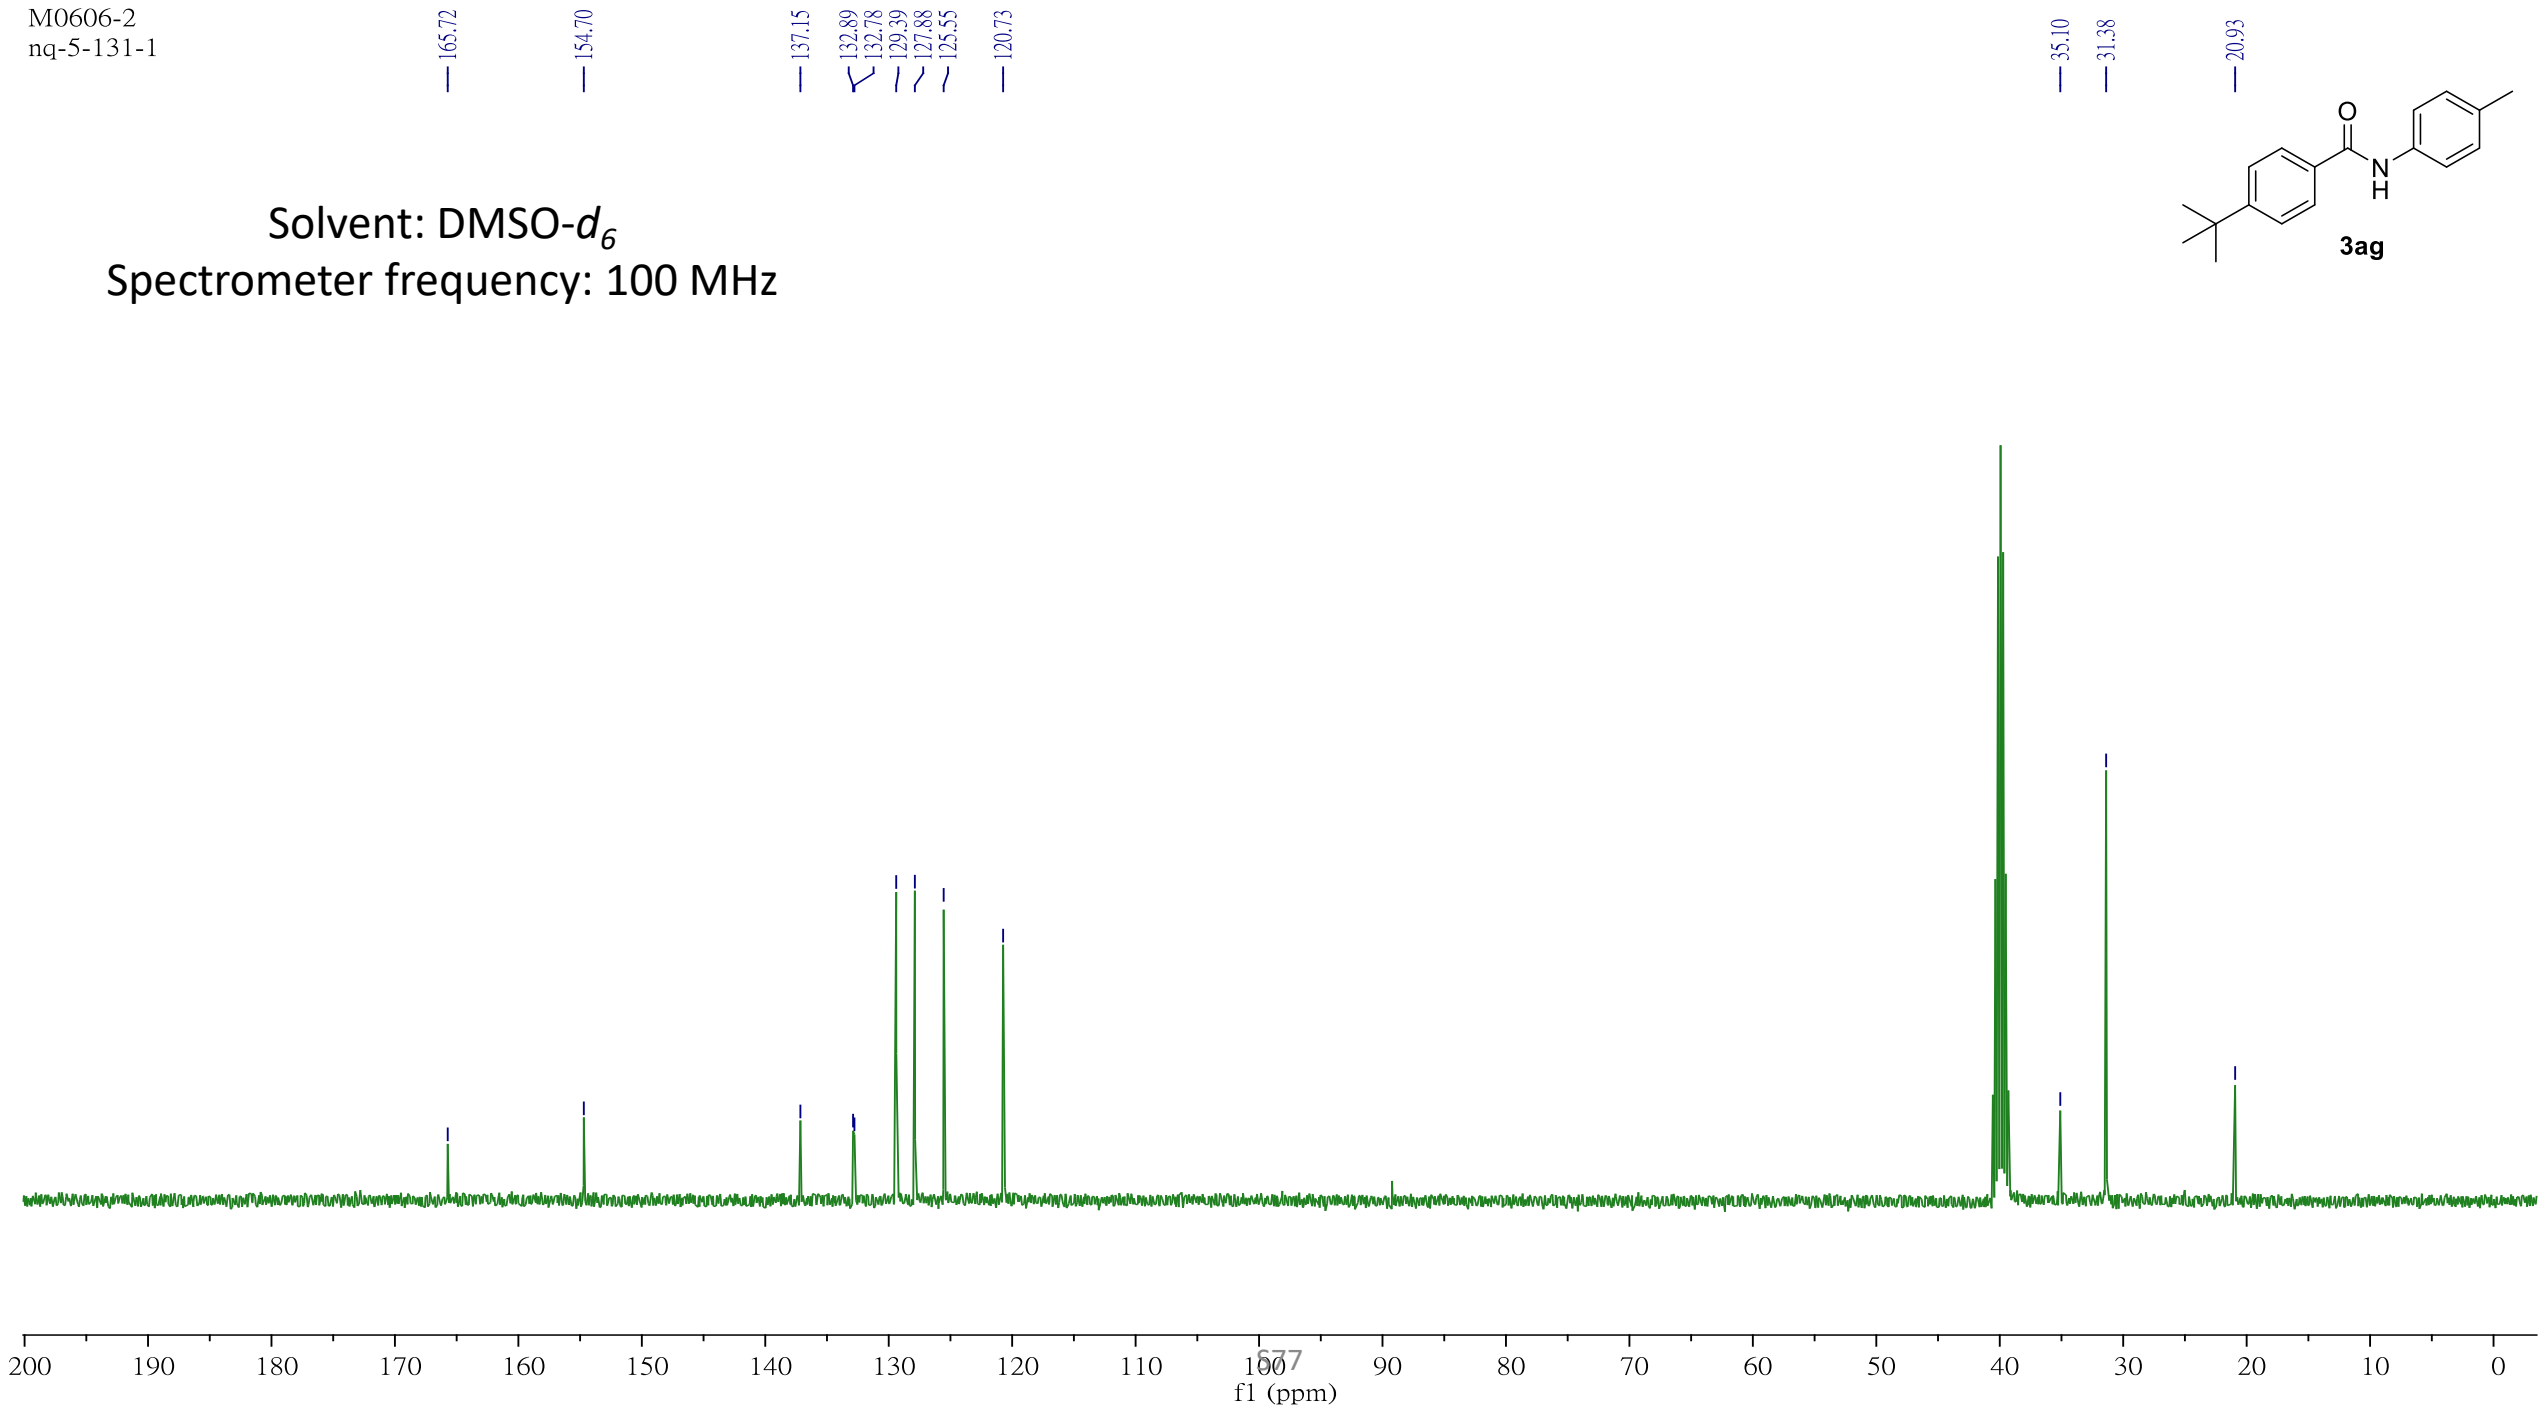

M0606-6  
nq-5-131-2

10.2210

7.8874  
7.8664  
7.8015  
7.7888  
7.7788  
7.7662  
7.5514  
7.5304  
7.2053  
7.1831  
7.1609

1.3173

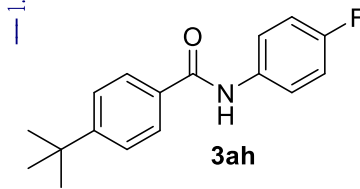

Solvent: DMSO- $d_6$   
Spectrometer frequency: 400 MHz

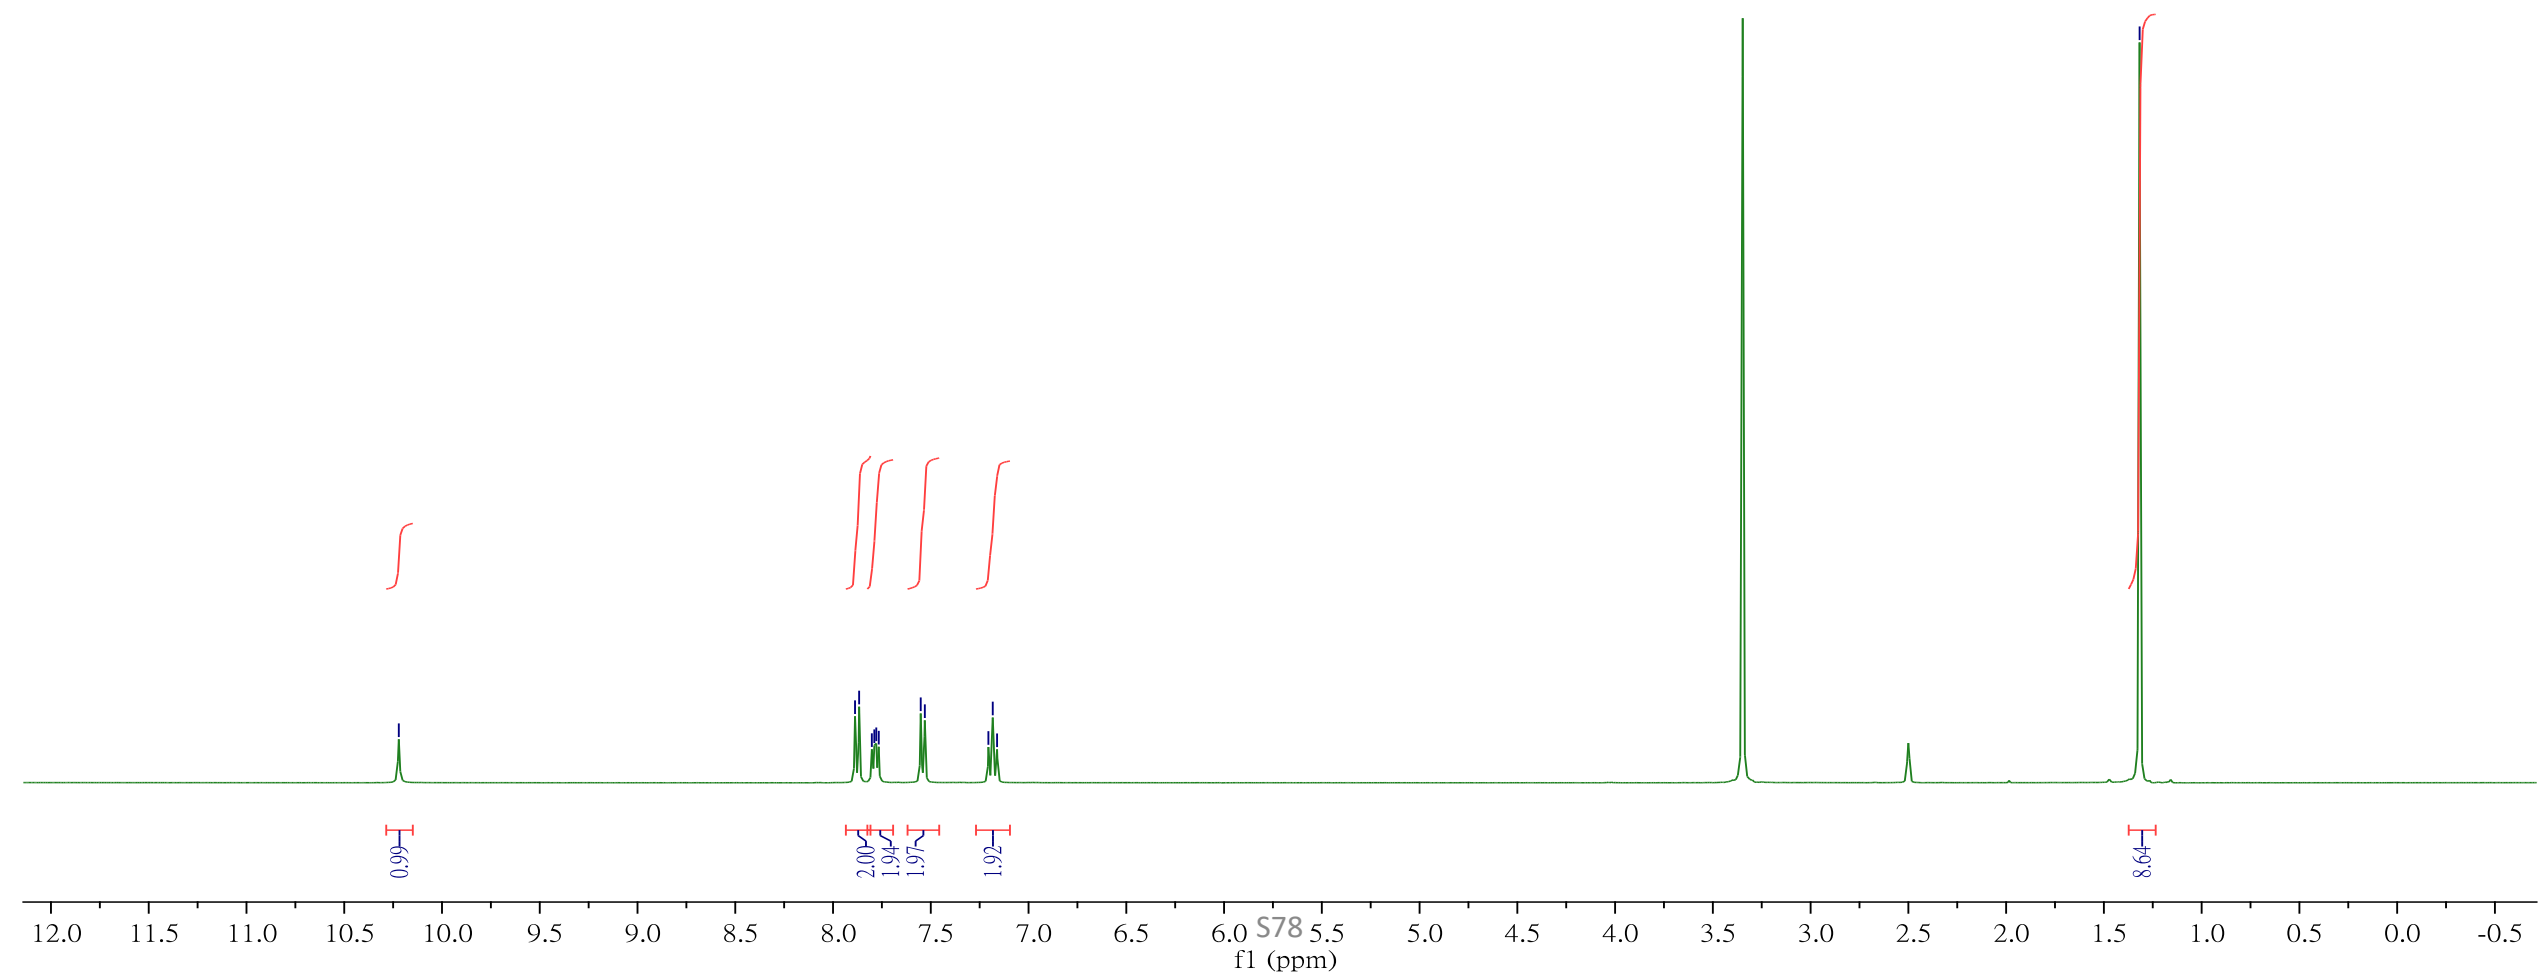

M0606-7  
nq-5-131-2

165.84  
159.83  
157.44  
154.89  
136.06  
132.53  
127.92  
125.60  
122.53  
122.45  
115.69  
115.47

Solvent: DMSO- $d_6$   
Spectrometer frequency: 100 MHz

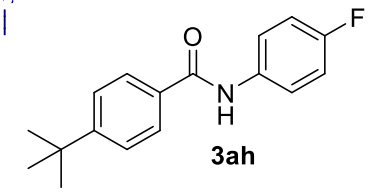

35.12  
31.37

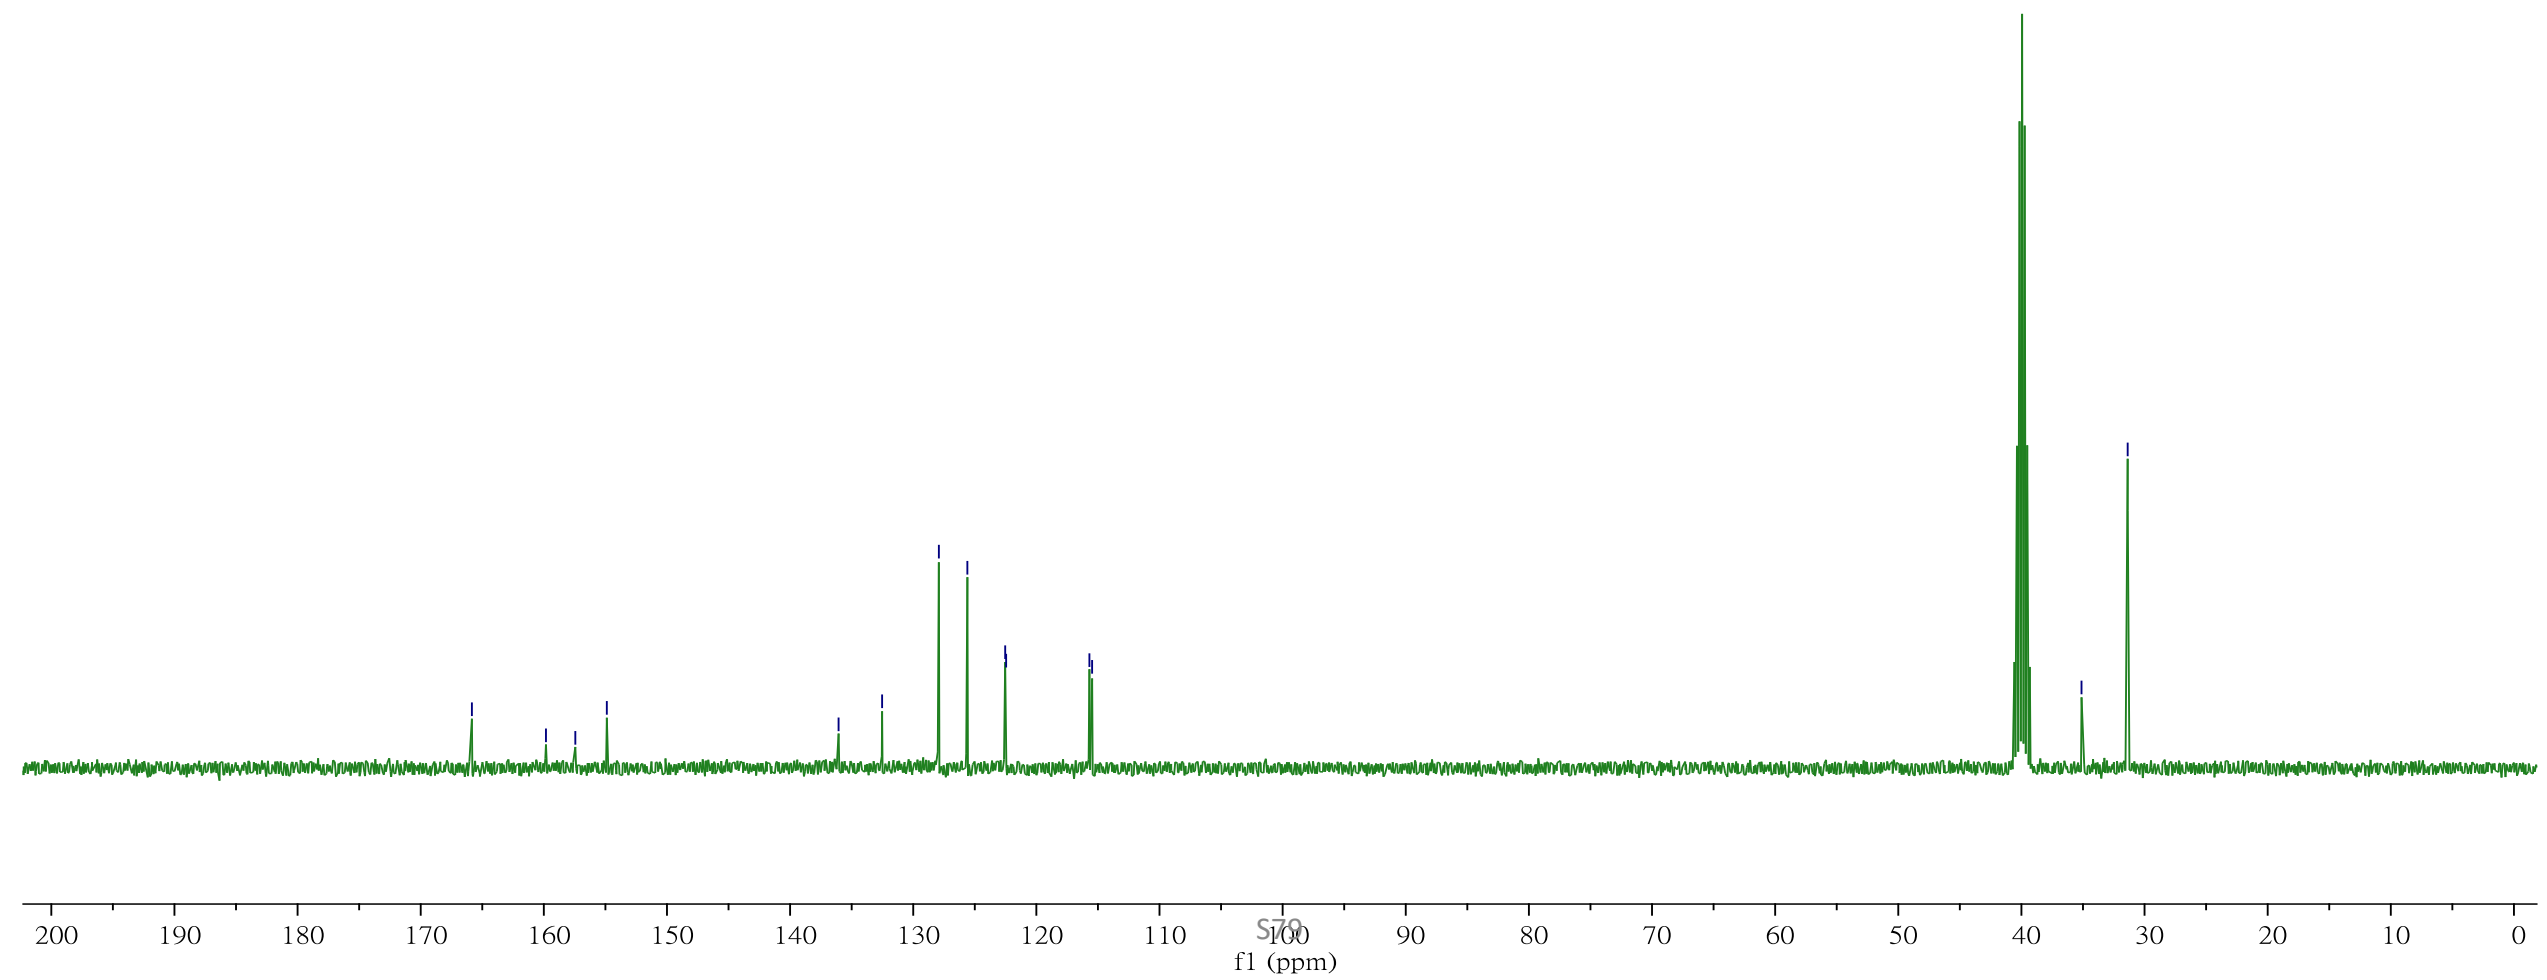



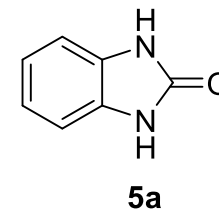

Solvent: DMSO- $d_6$   
Spectrometer frequency: 400 MHz

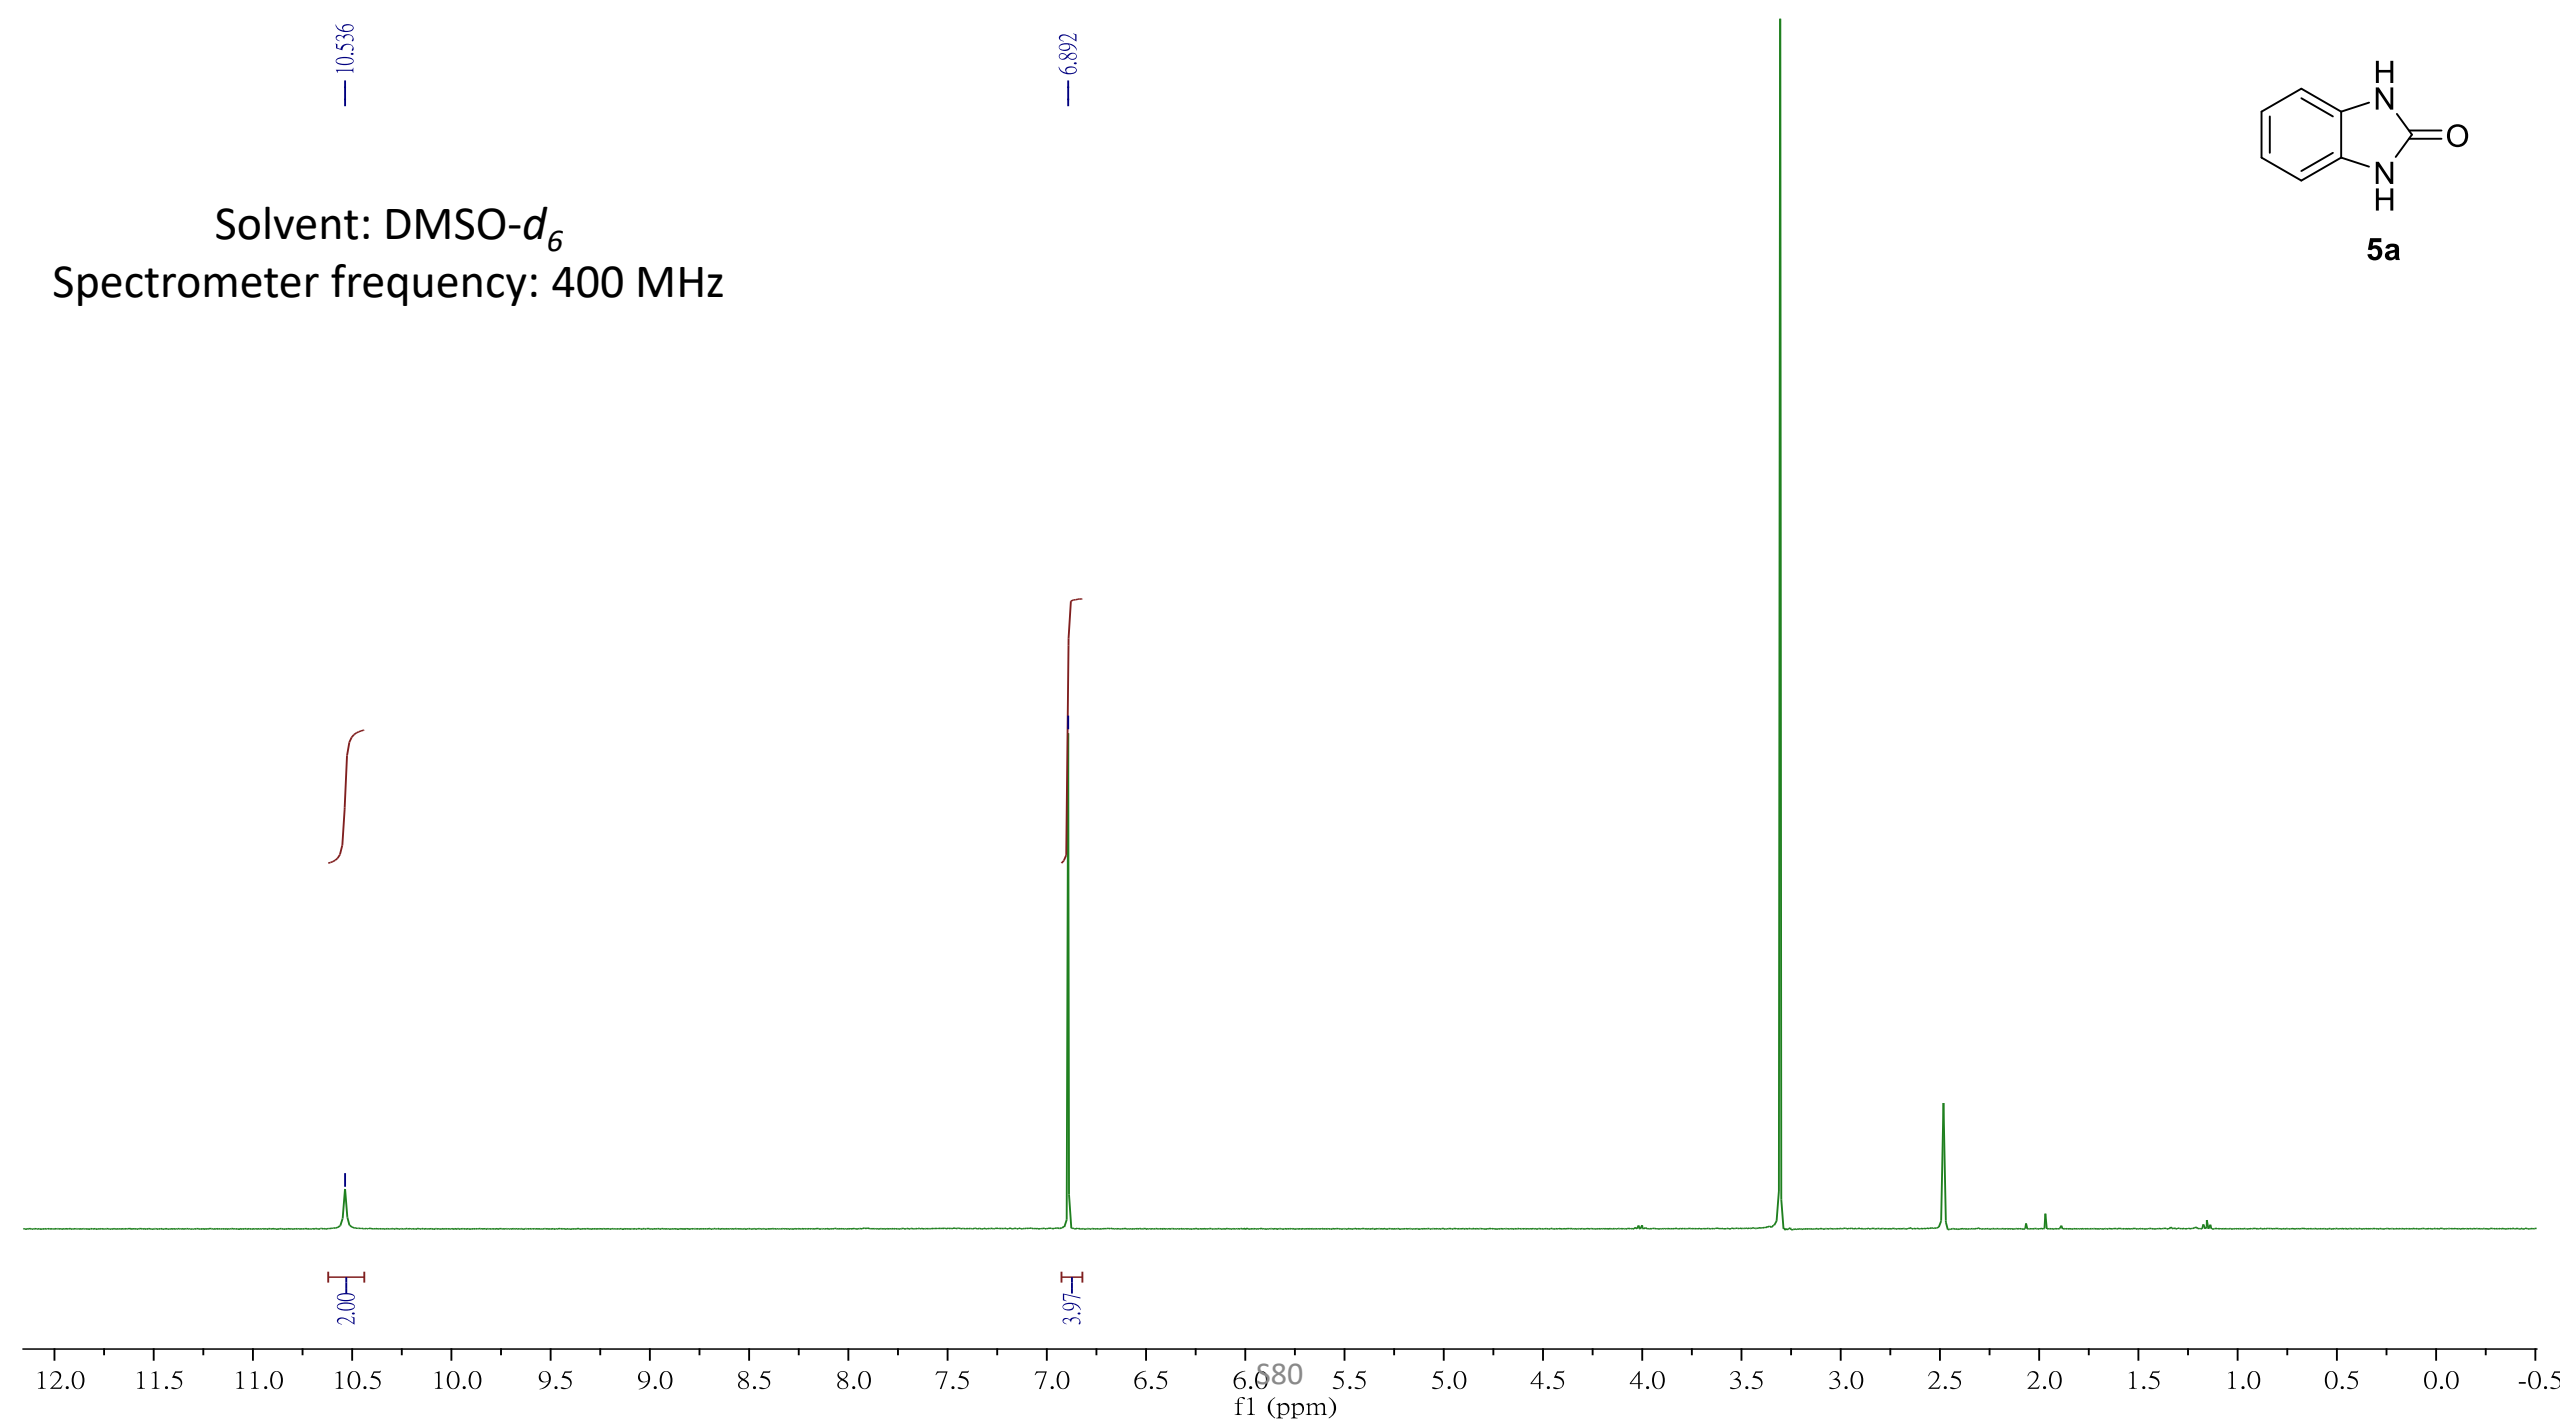

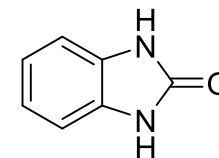

**5a**

Solvent: DMSO- $d_6$   
Spectrometer frequency: 100 MHz

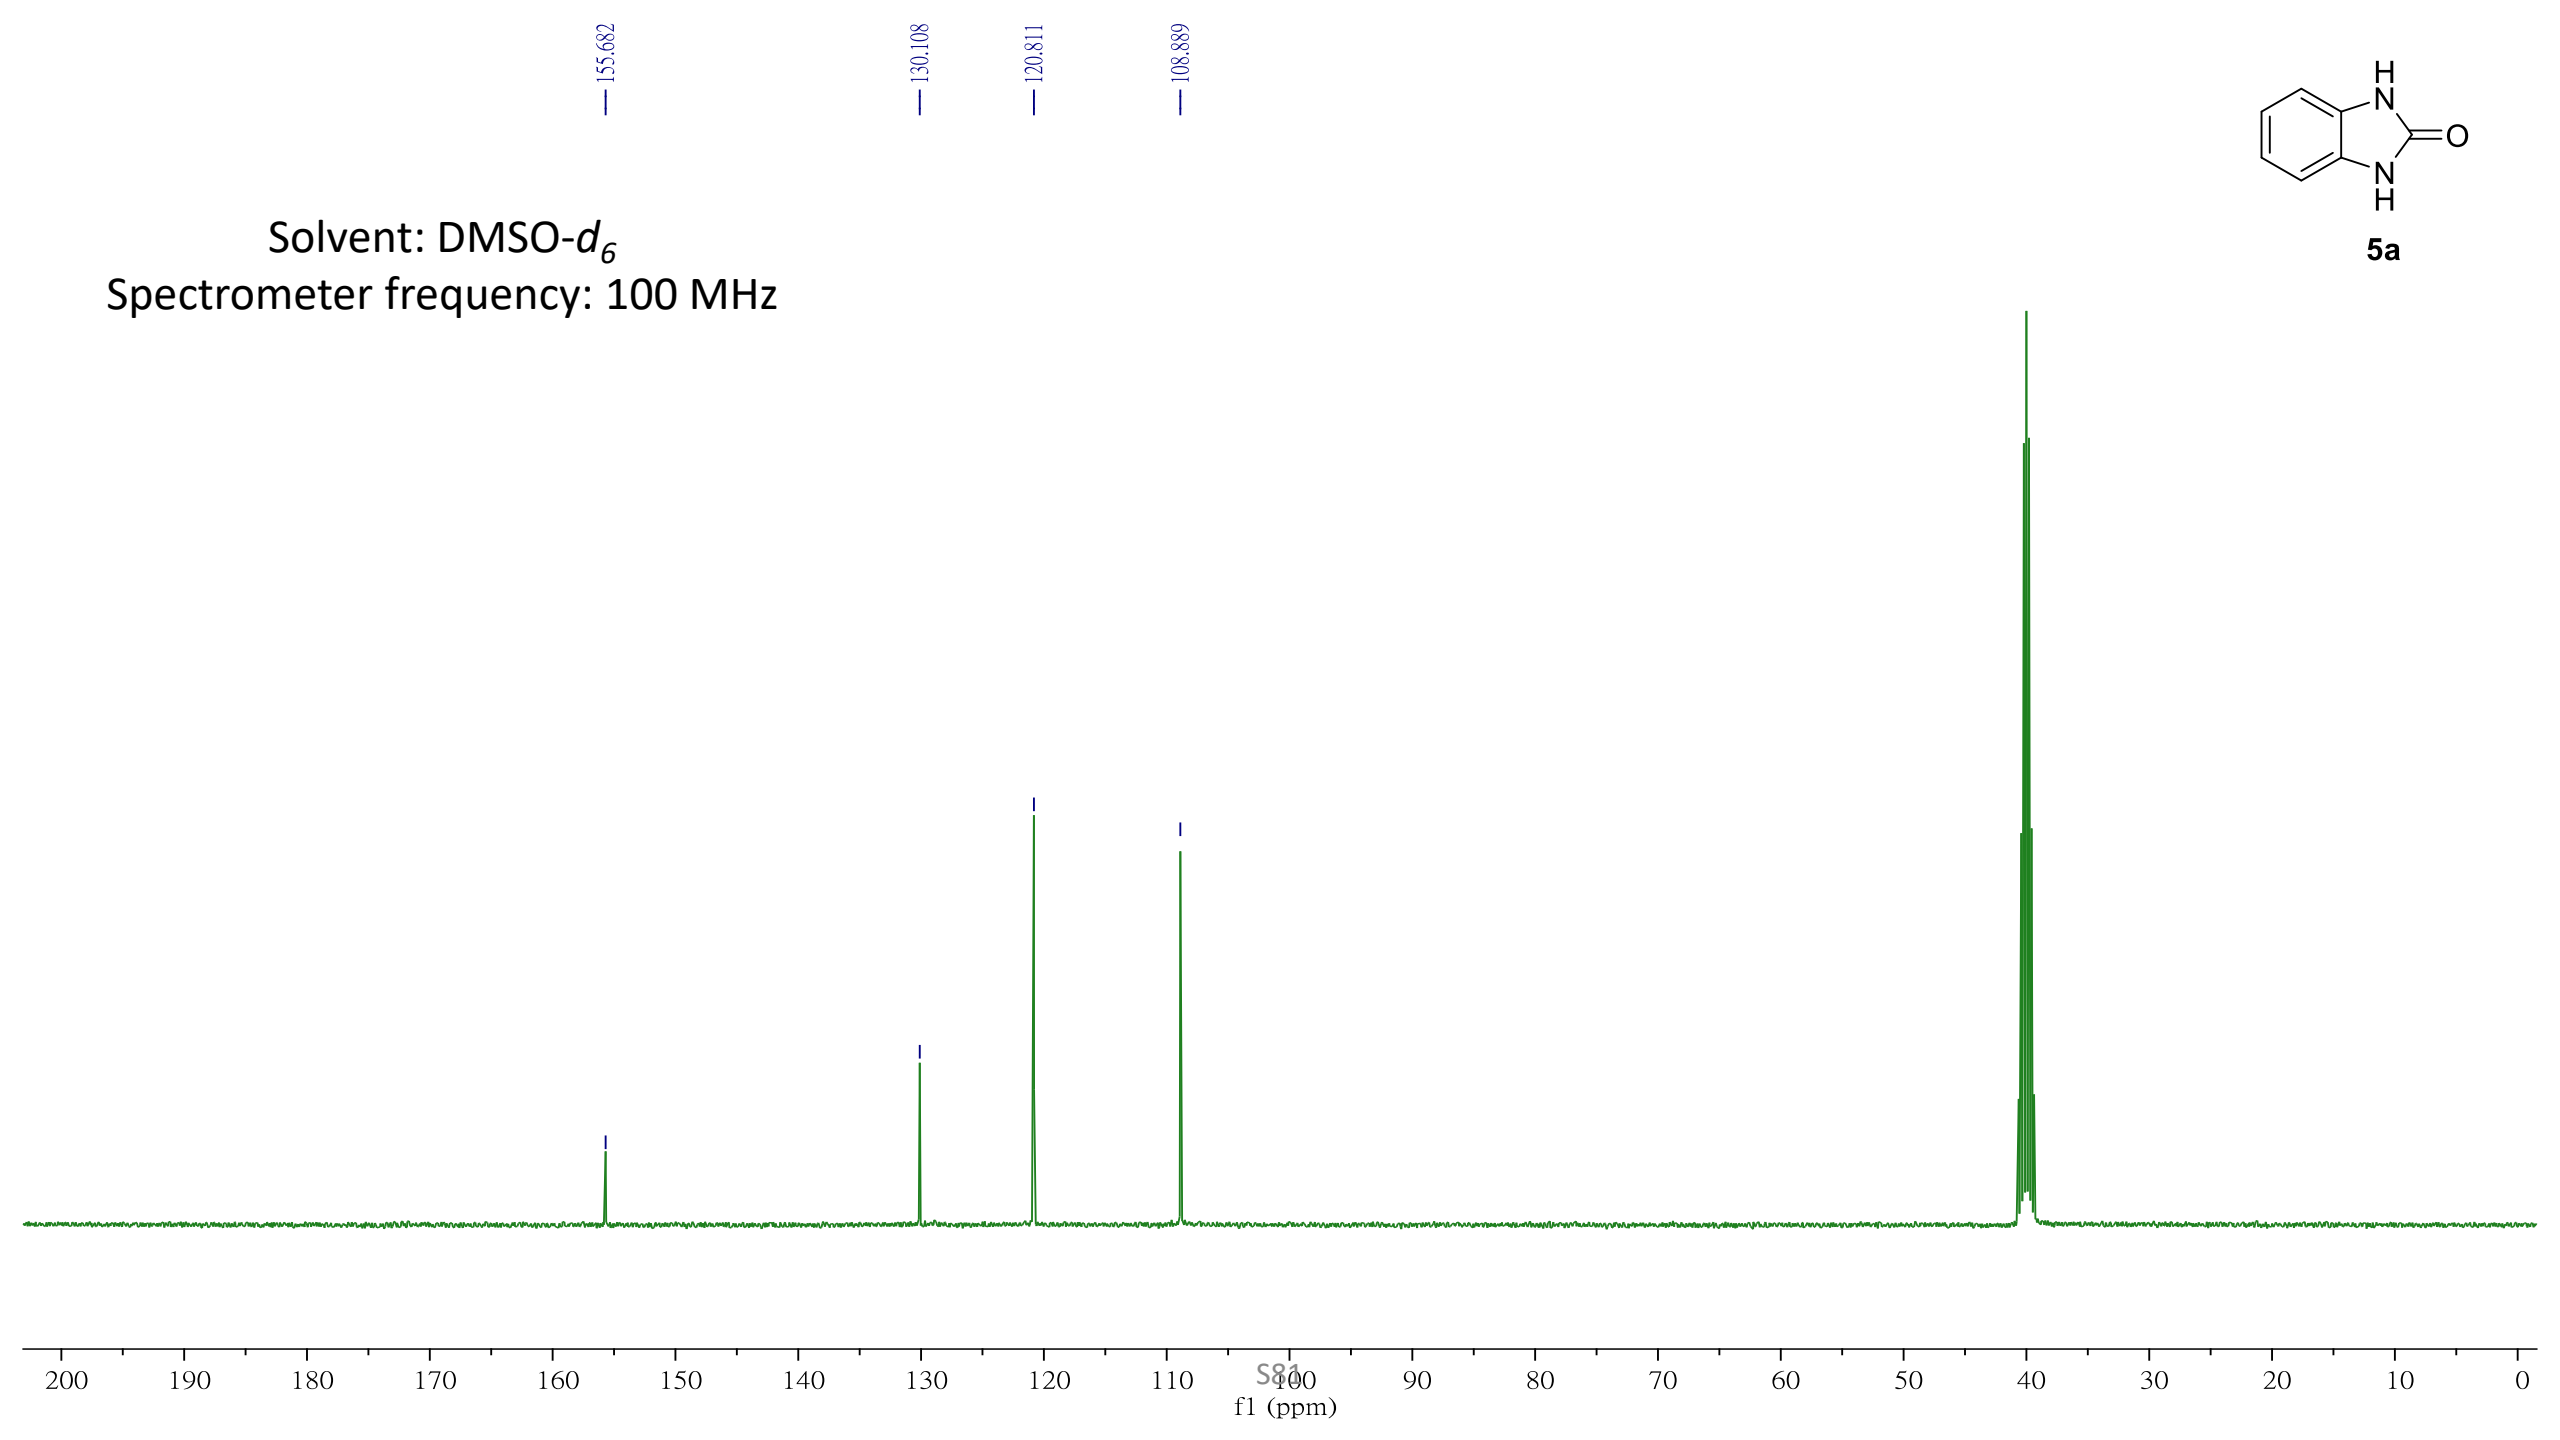

10.620  
10.499

6.838  
6.819  
6.800  
6.745  
6.737  
6.735  
6.726  
6.718  
6.716

2.250

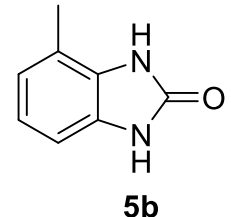

Solvent: DMSO-*d*<sub>6</sub>  
Spectrometer frequency: 400 MHz

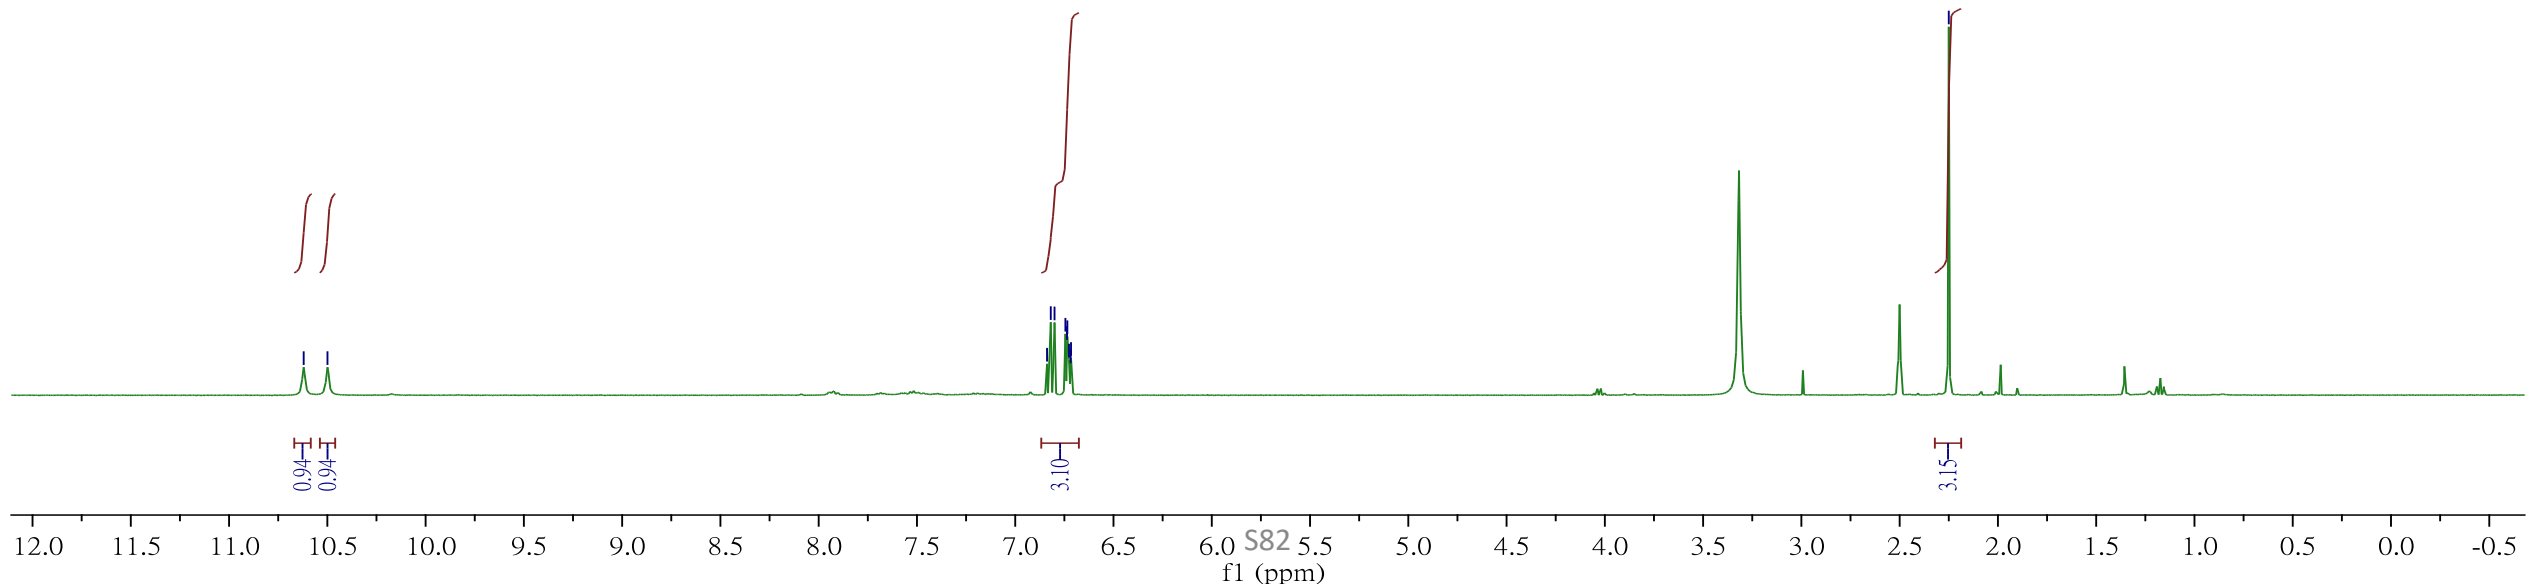

Solvent: DMSO- $d_6$   
Spectrometer frequency: 100 MHz

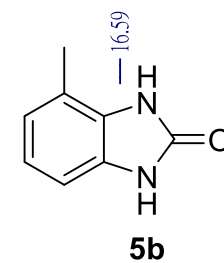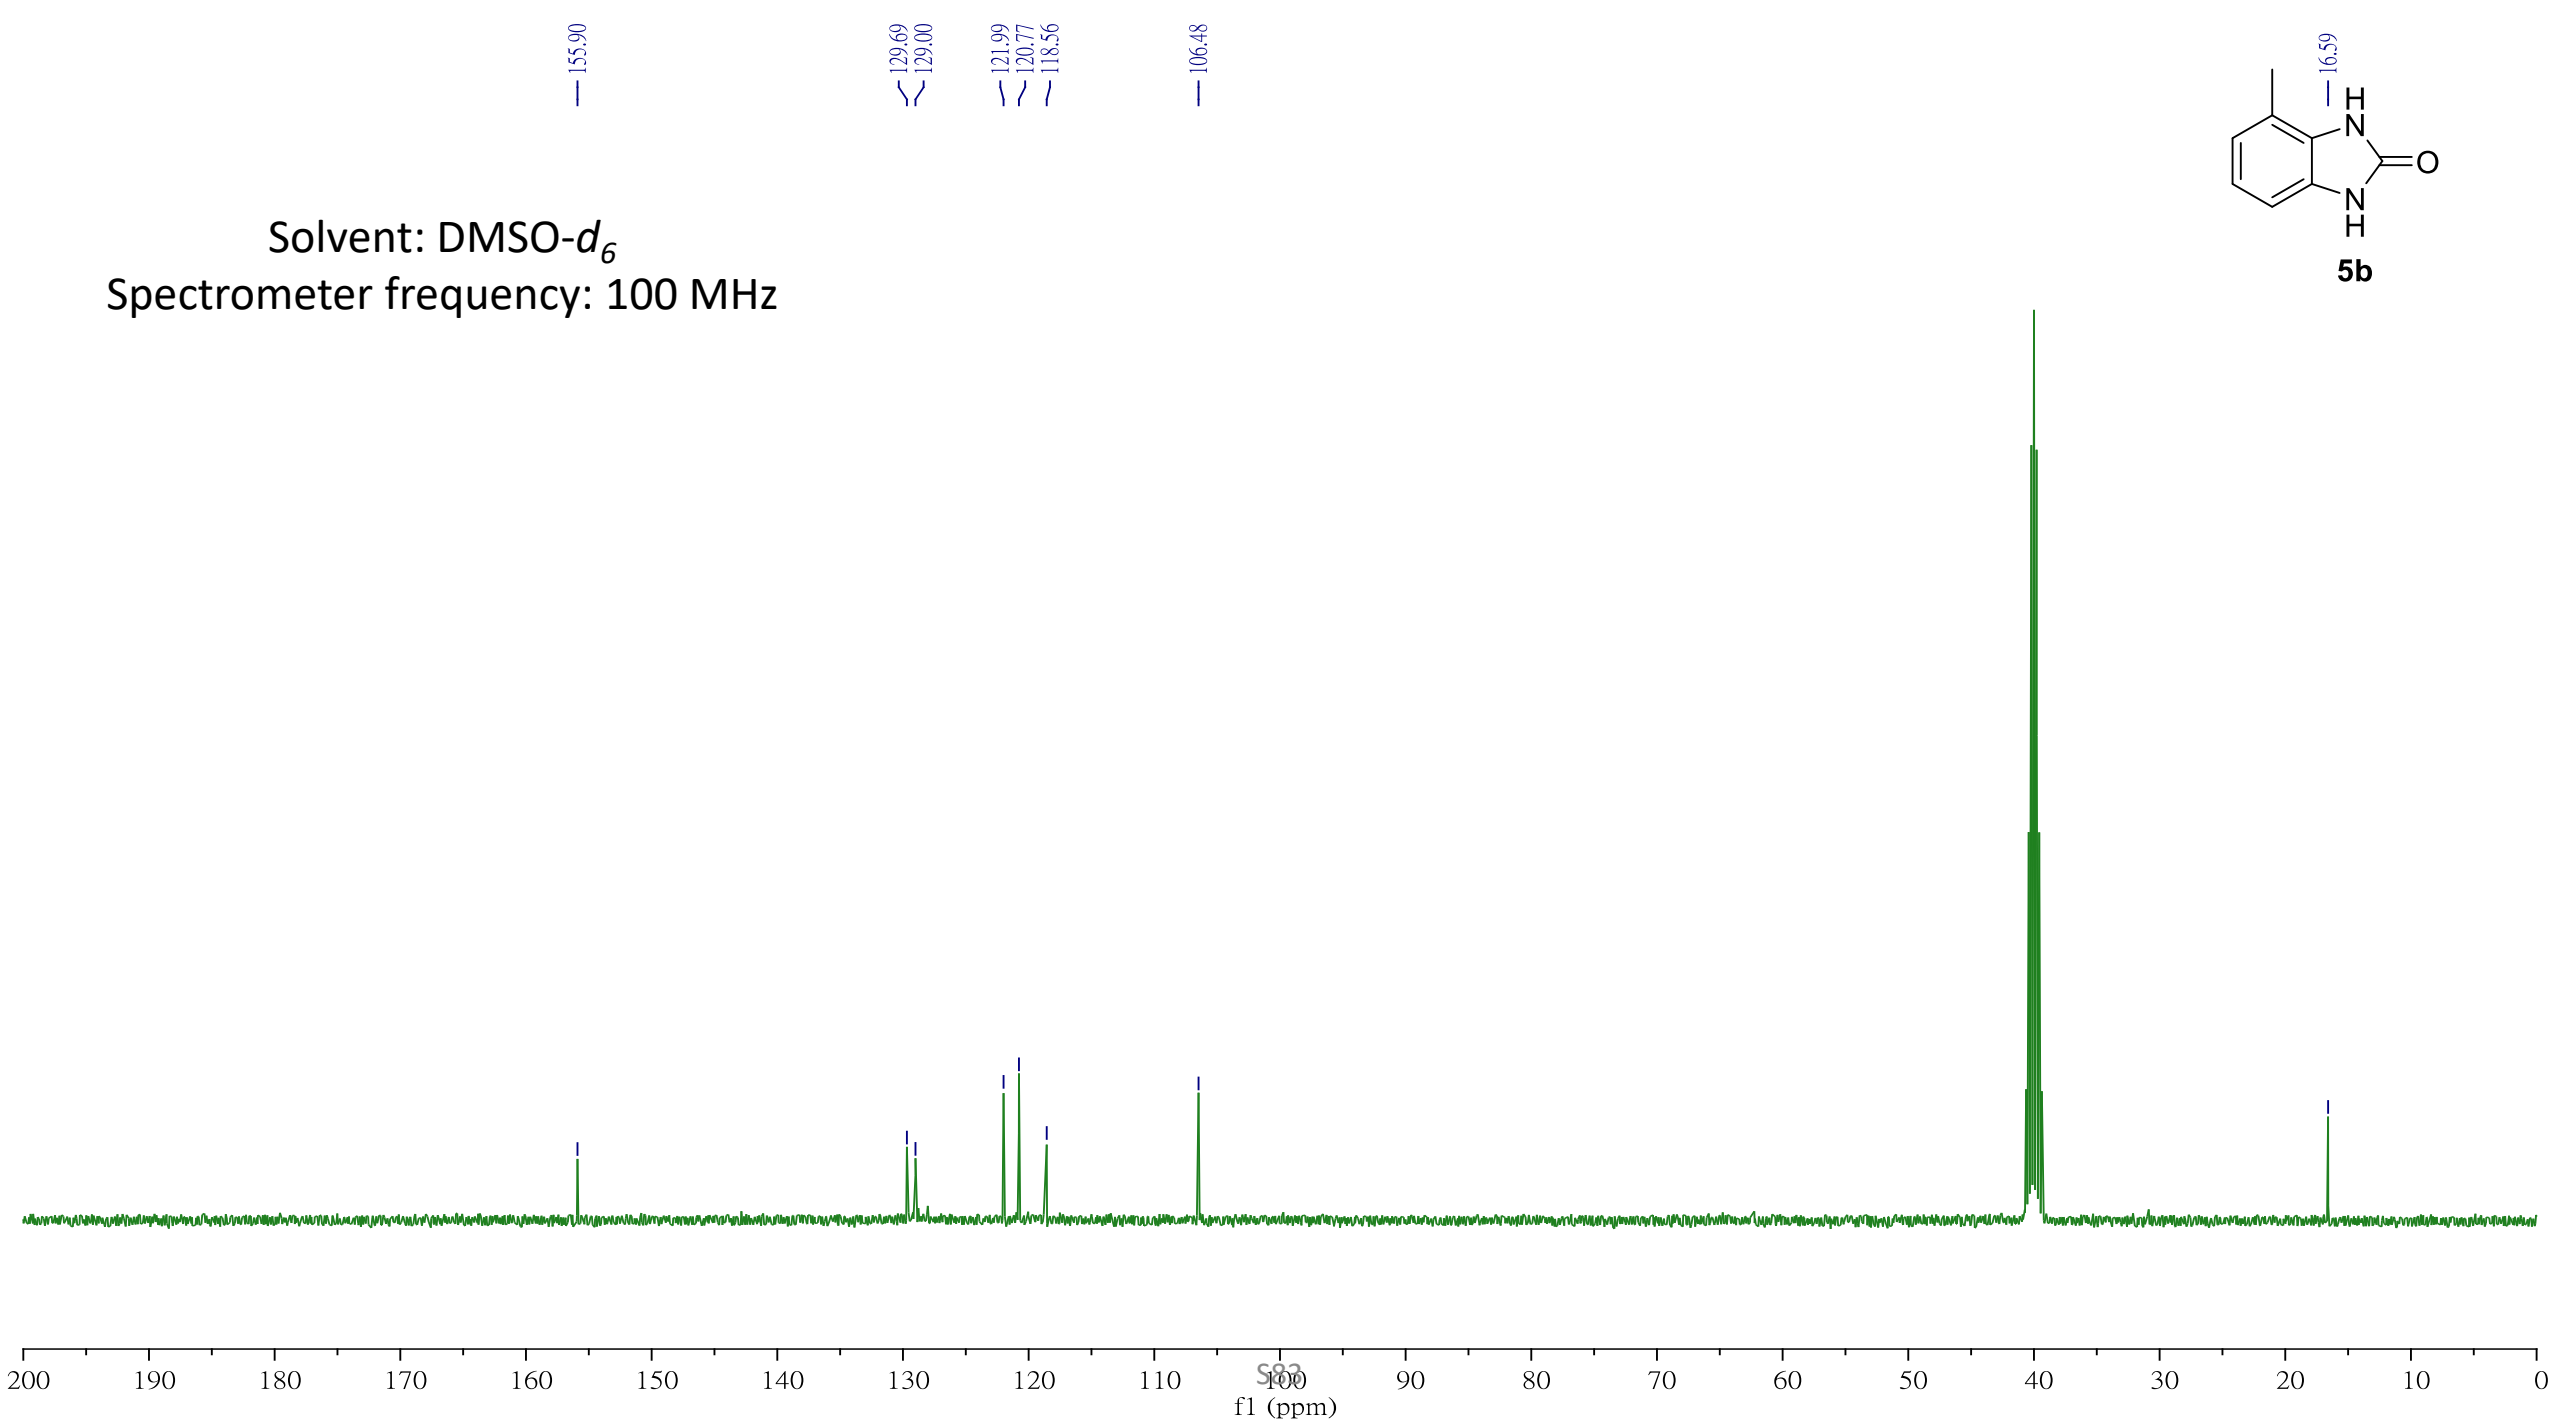

Solvent: DMSO- $d_6$   
Spectrometer frequency: 400 MHz

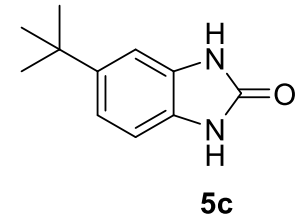

10.397

6.948  
6.943  
6.928  
6.923  
6.887  
6.883  
6.818  
6.798

1.243

1.85

2.97

9.00

6.84  
f1 (ppm)

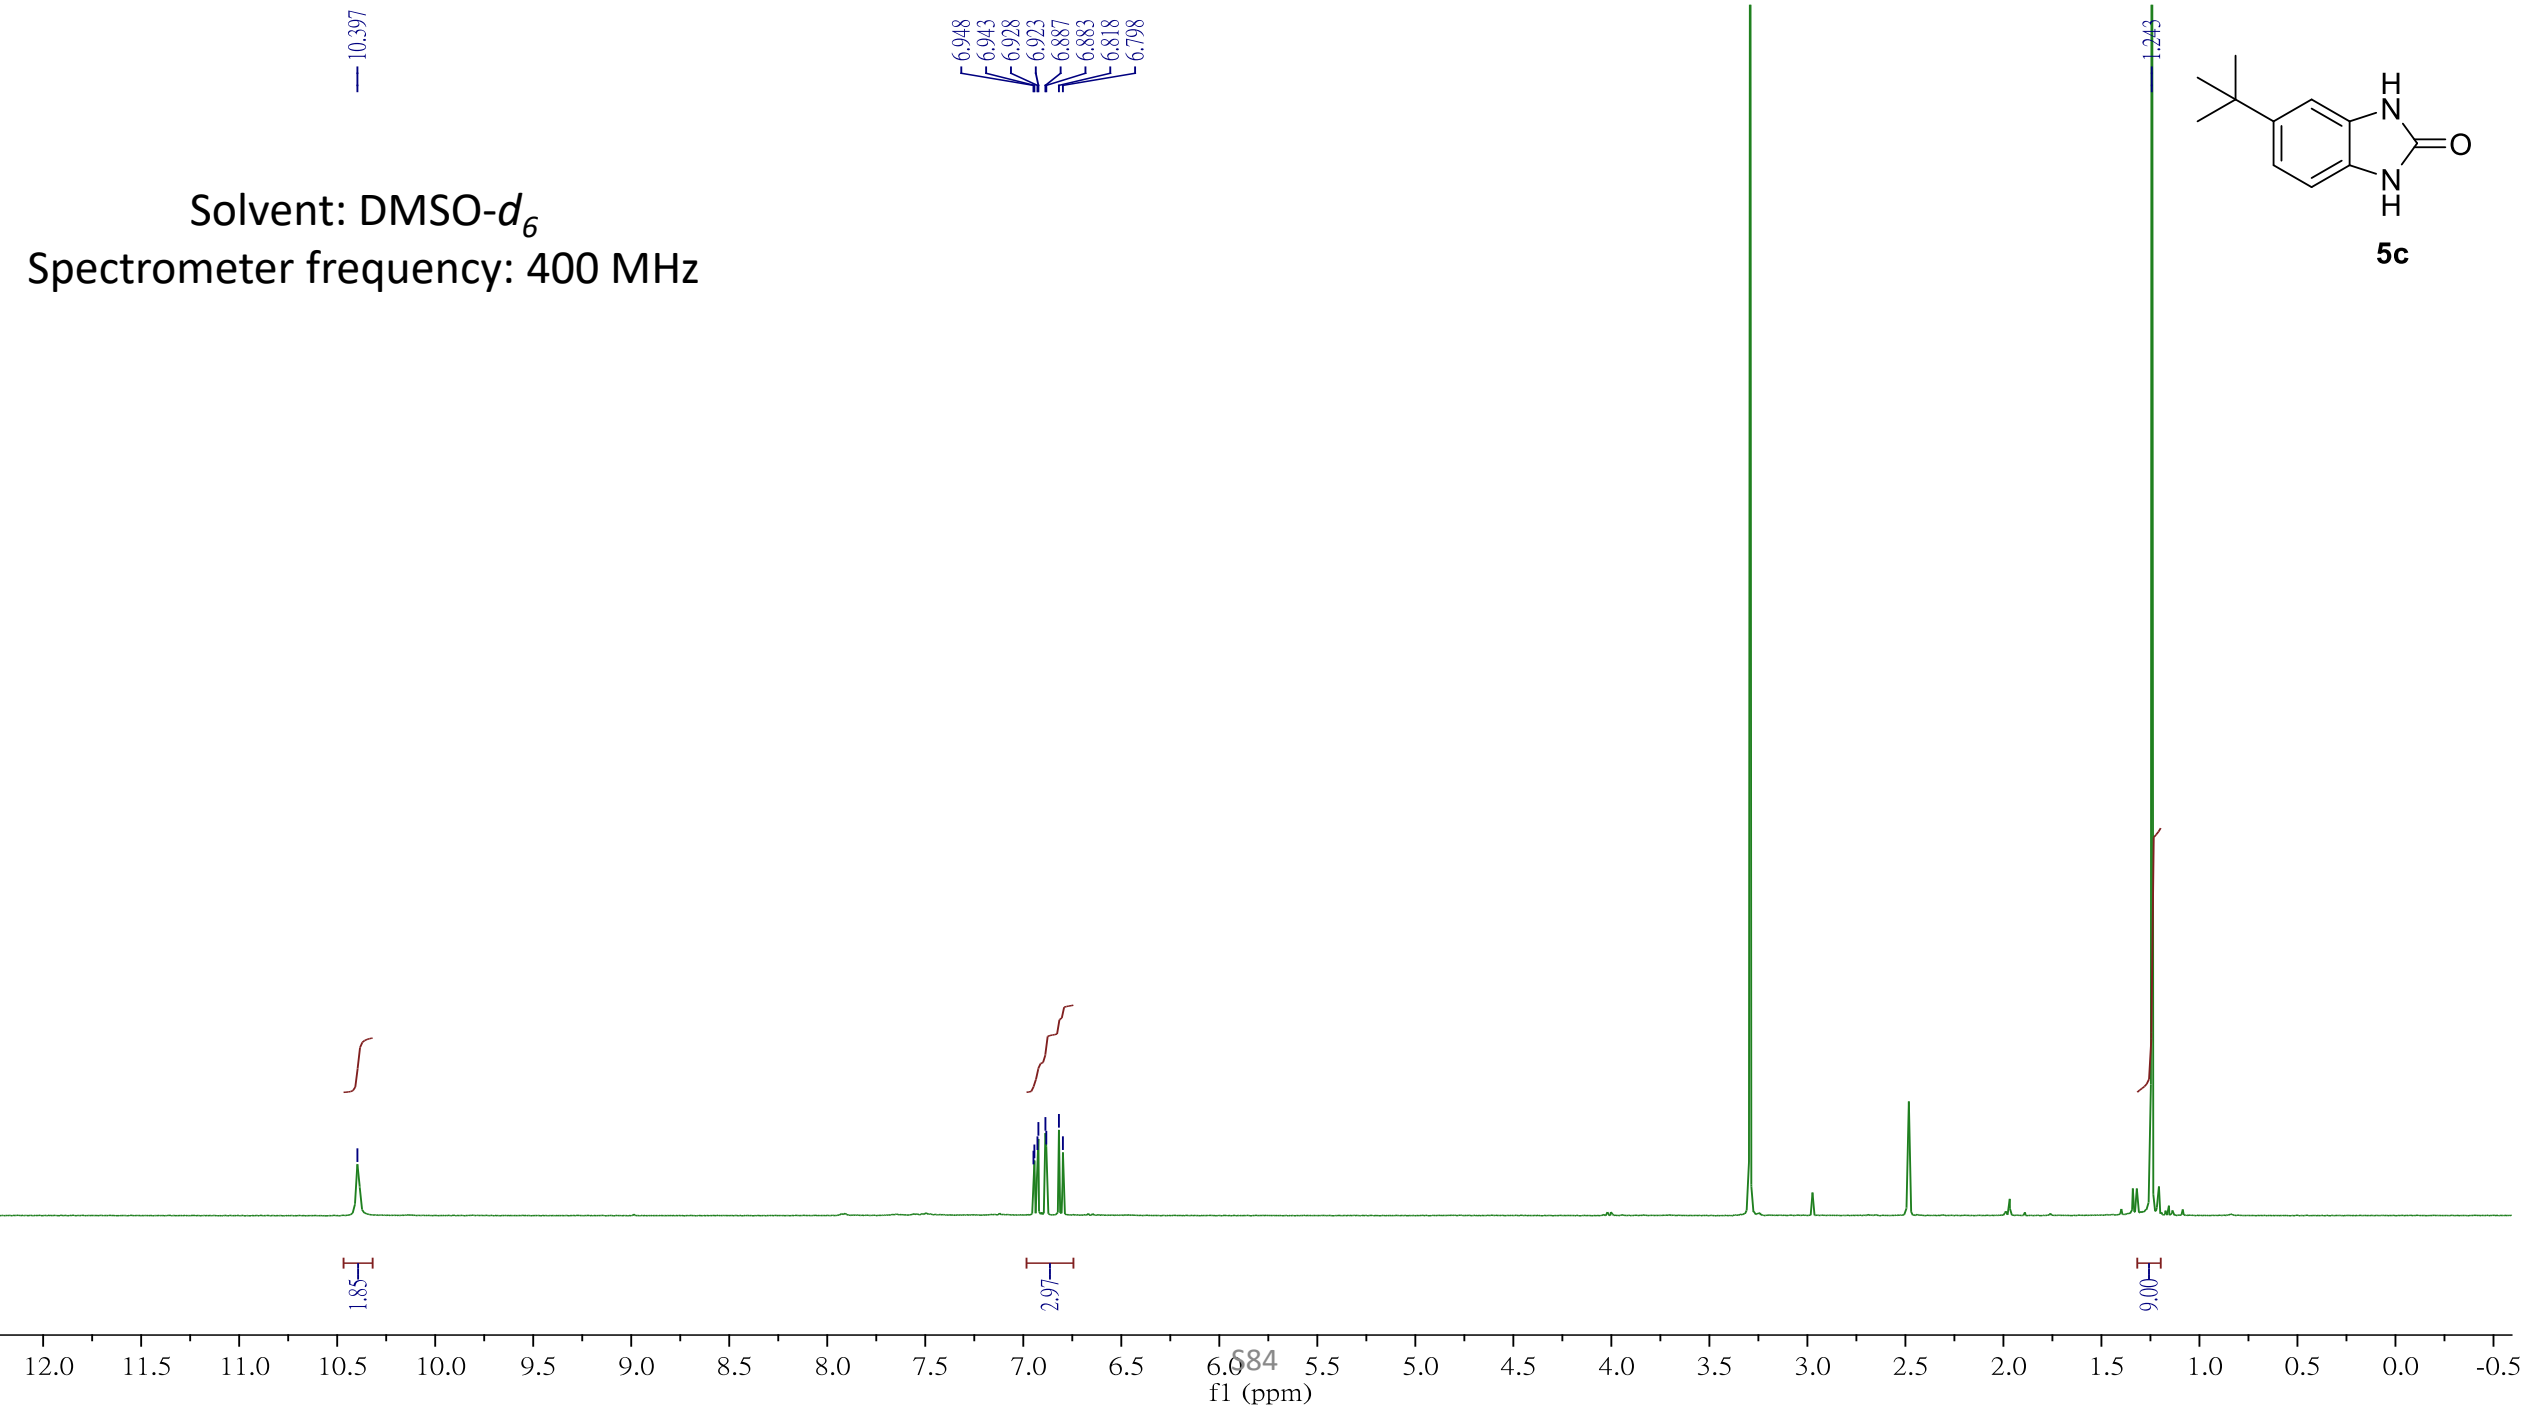

Solvent: DMSO- $d_6$   
Spectrometer frequency: 100 MHz

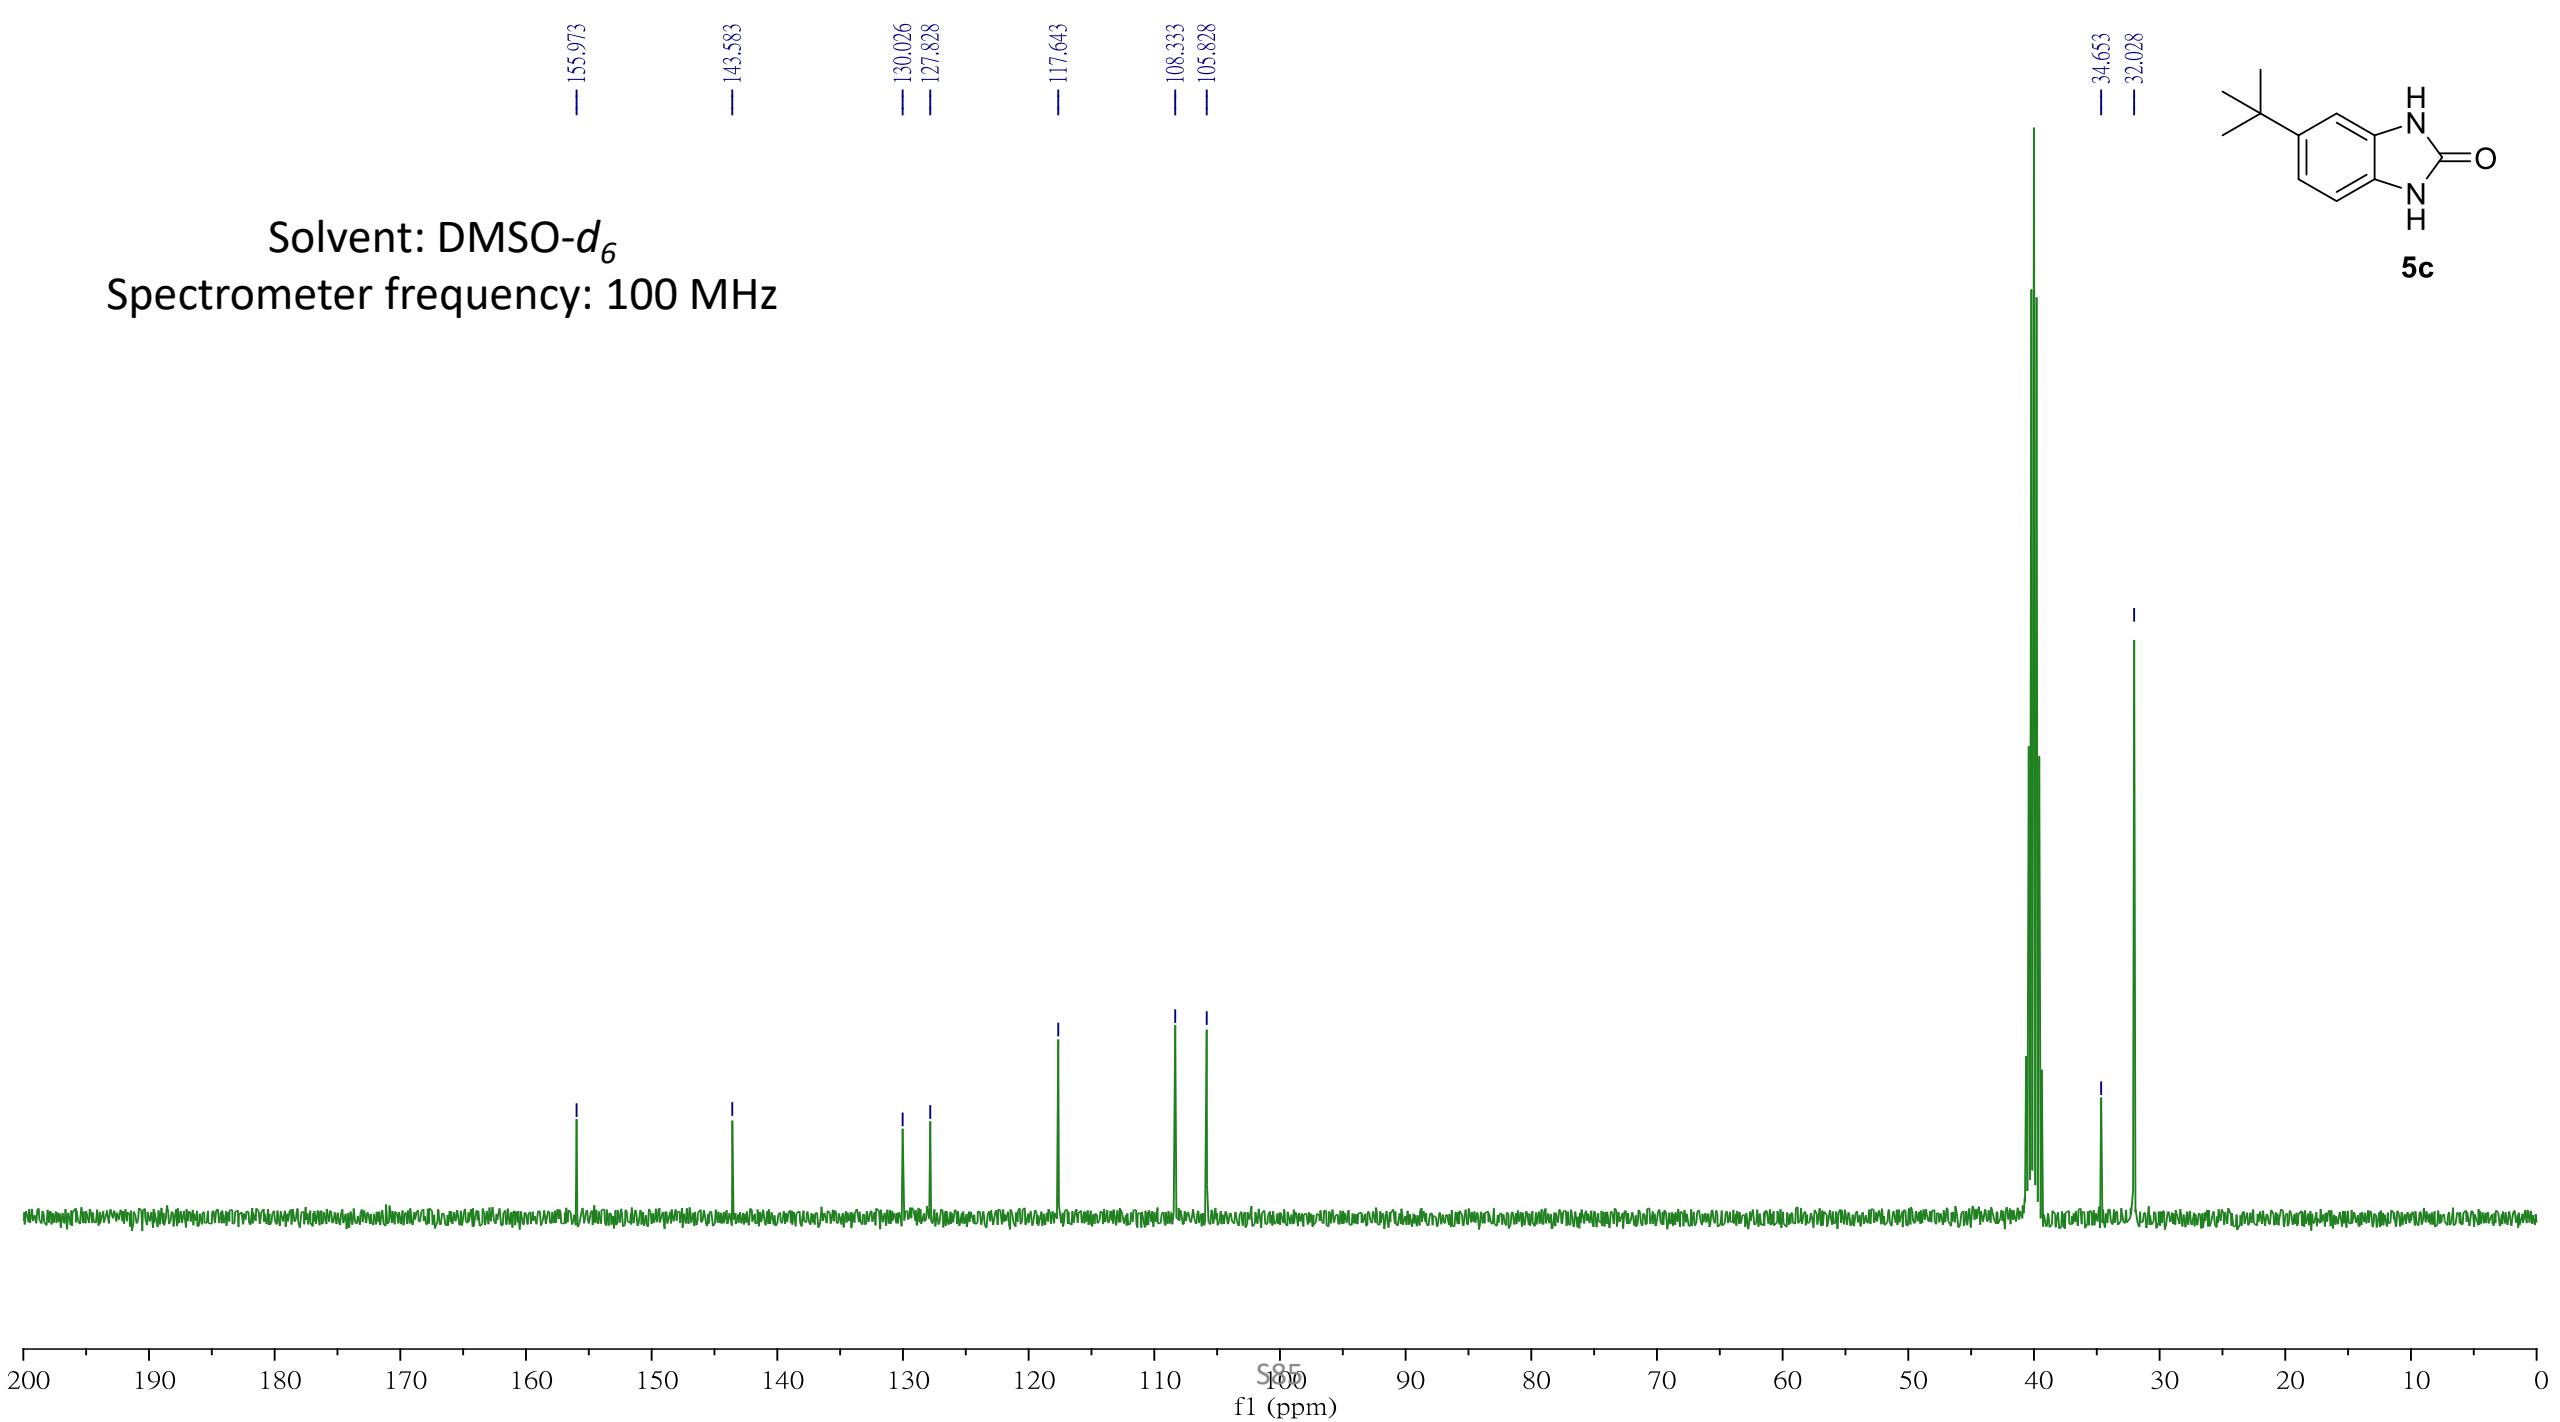

M0570-17  
NQ-5-100 ALL E  
11.0300  
10.9343

7.2941  
7.2737  
7.1585  
7.0953  
7.0750

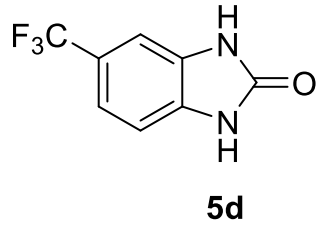

Solvent: DMSO-*d*<sub>6</sub>  
Spectrometer frequency: 400 MHz

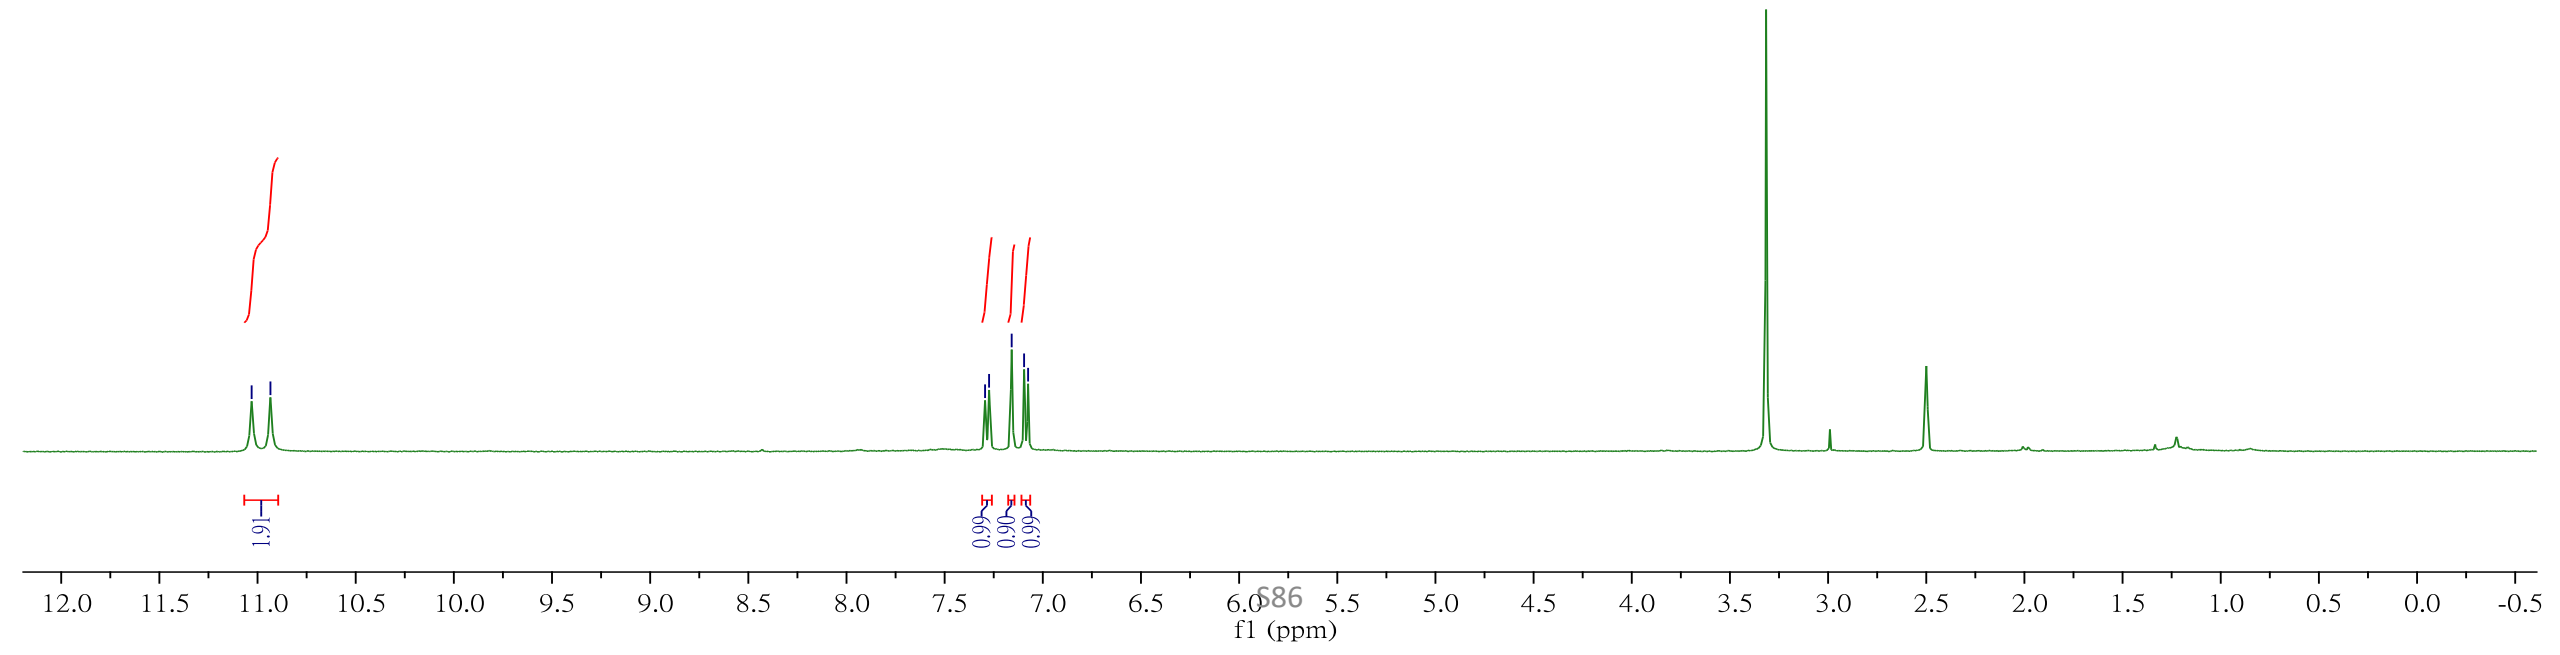

M0570-21  
NQ-5-100-ALL EA

155.74

133.29  
130.26  
126.64  
124.98  
122.81  
121.61  
121.29  
120.49  
118.37  
118.33  
118.29  
118.24

109.17  
108.97  
105.33

Solvent: DMSO- $d_6$   
Spectrometer frequency: 100 MHz

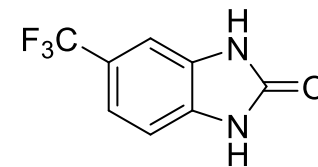

**5d**

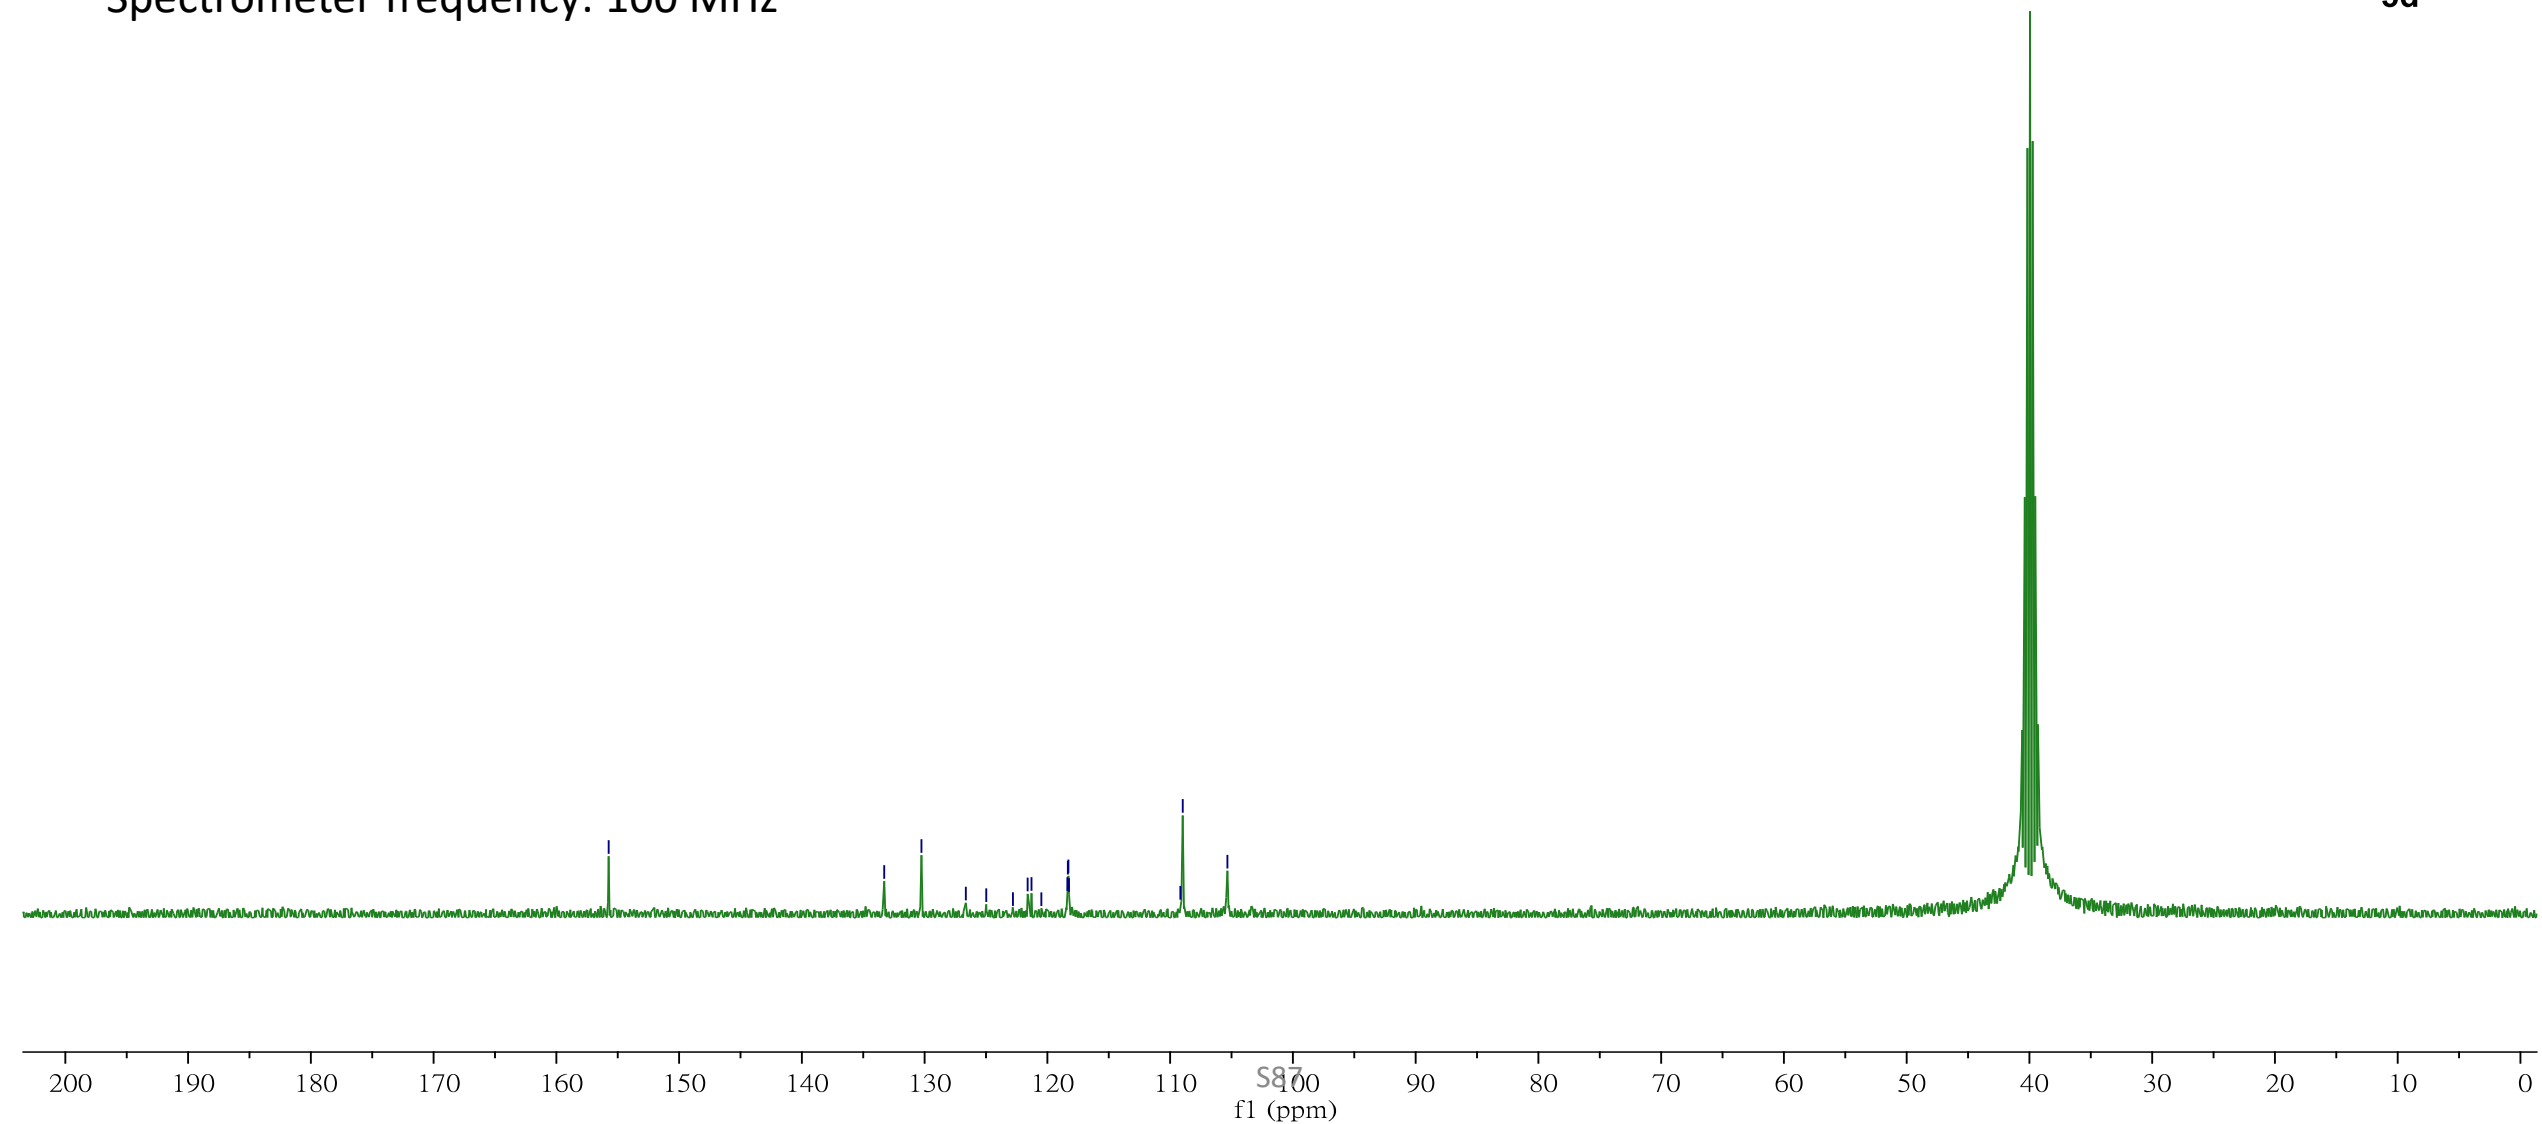



10.4384  
10.4019

6.7741  
6.7533  
6.7075  
6.6908

2.2513

Solvent: DMSO- $d_6$   
Spectrometer frequency: 400 MHz

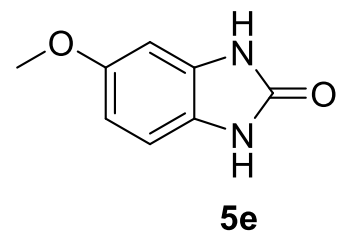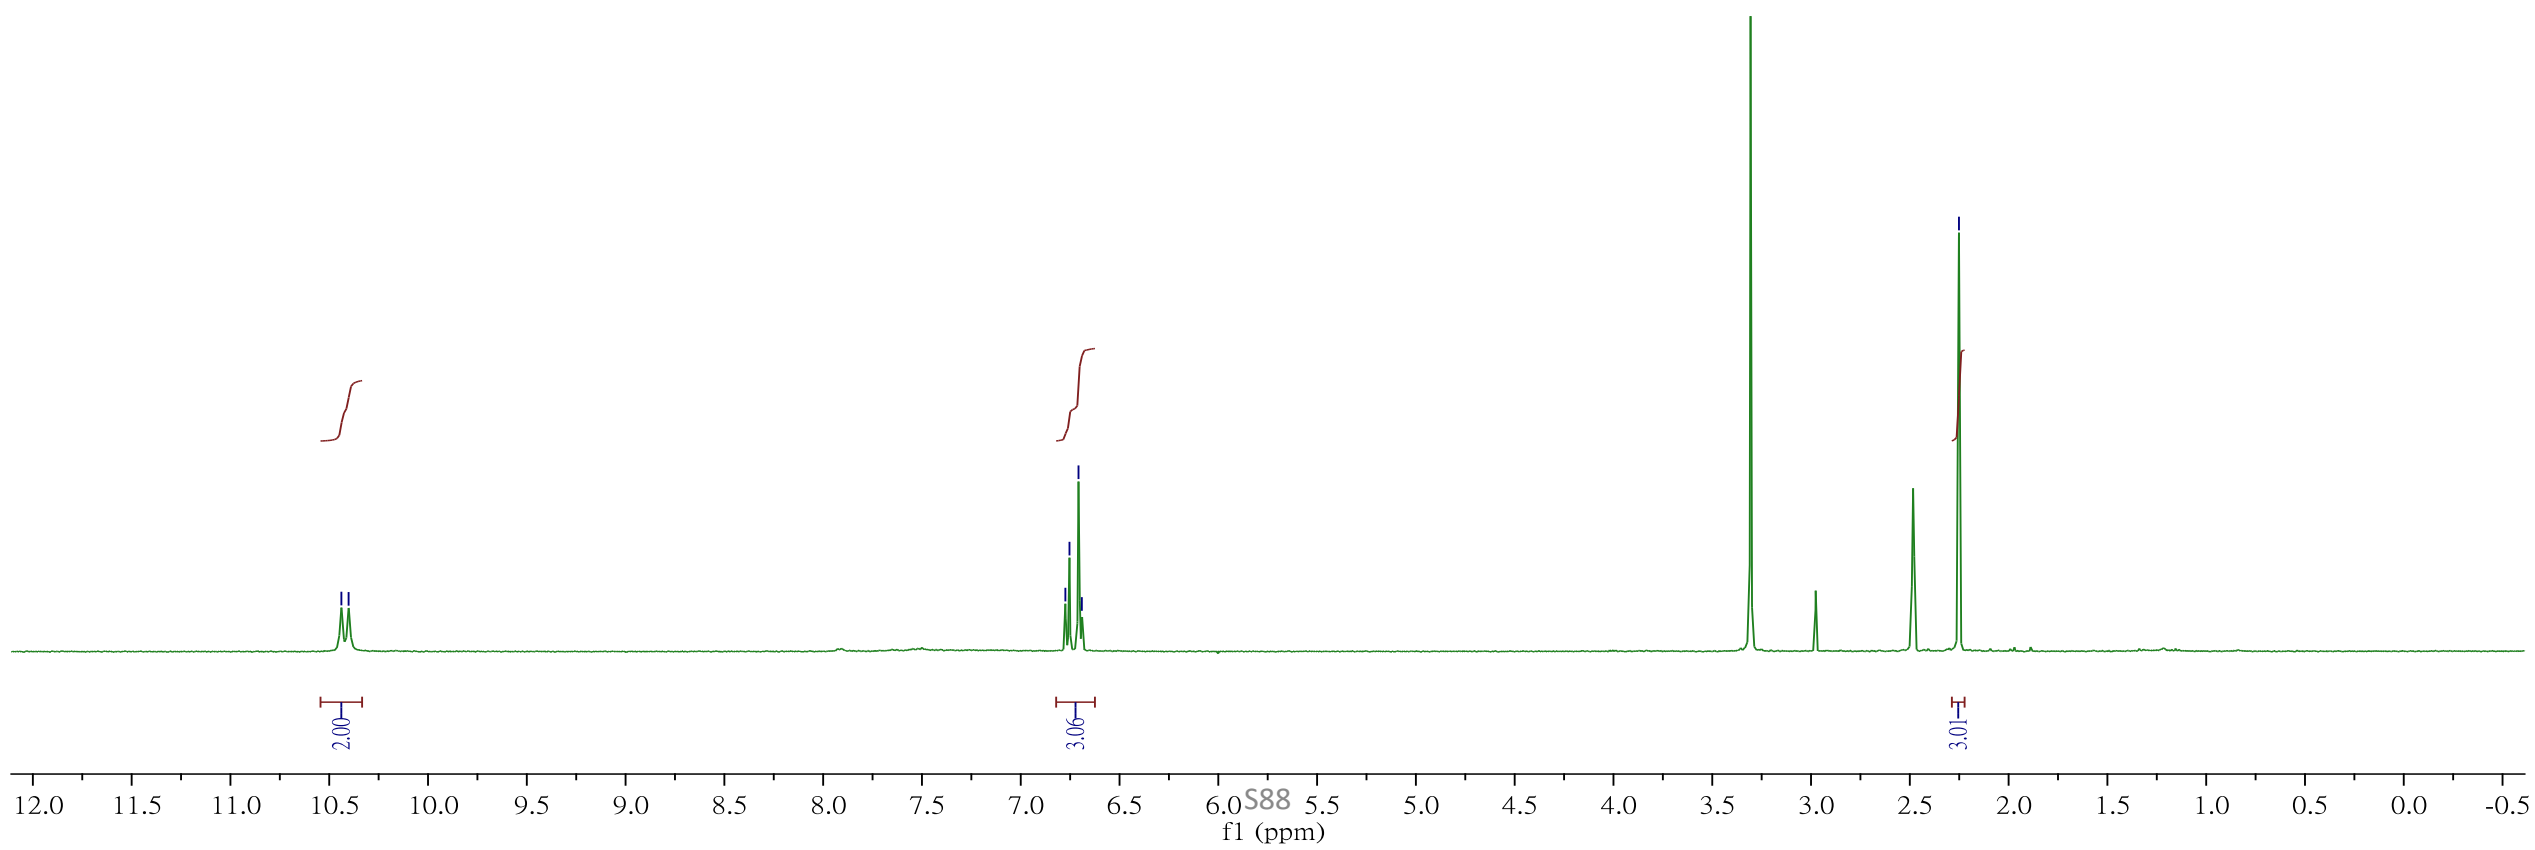

S88

Solvent: DMSO-*d*<sub>6</sub>  
Spectrometer frequency: 100 MHz

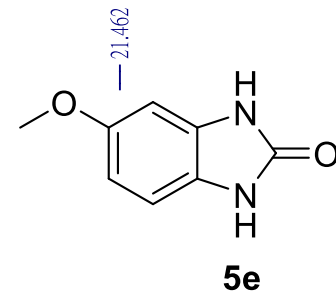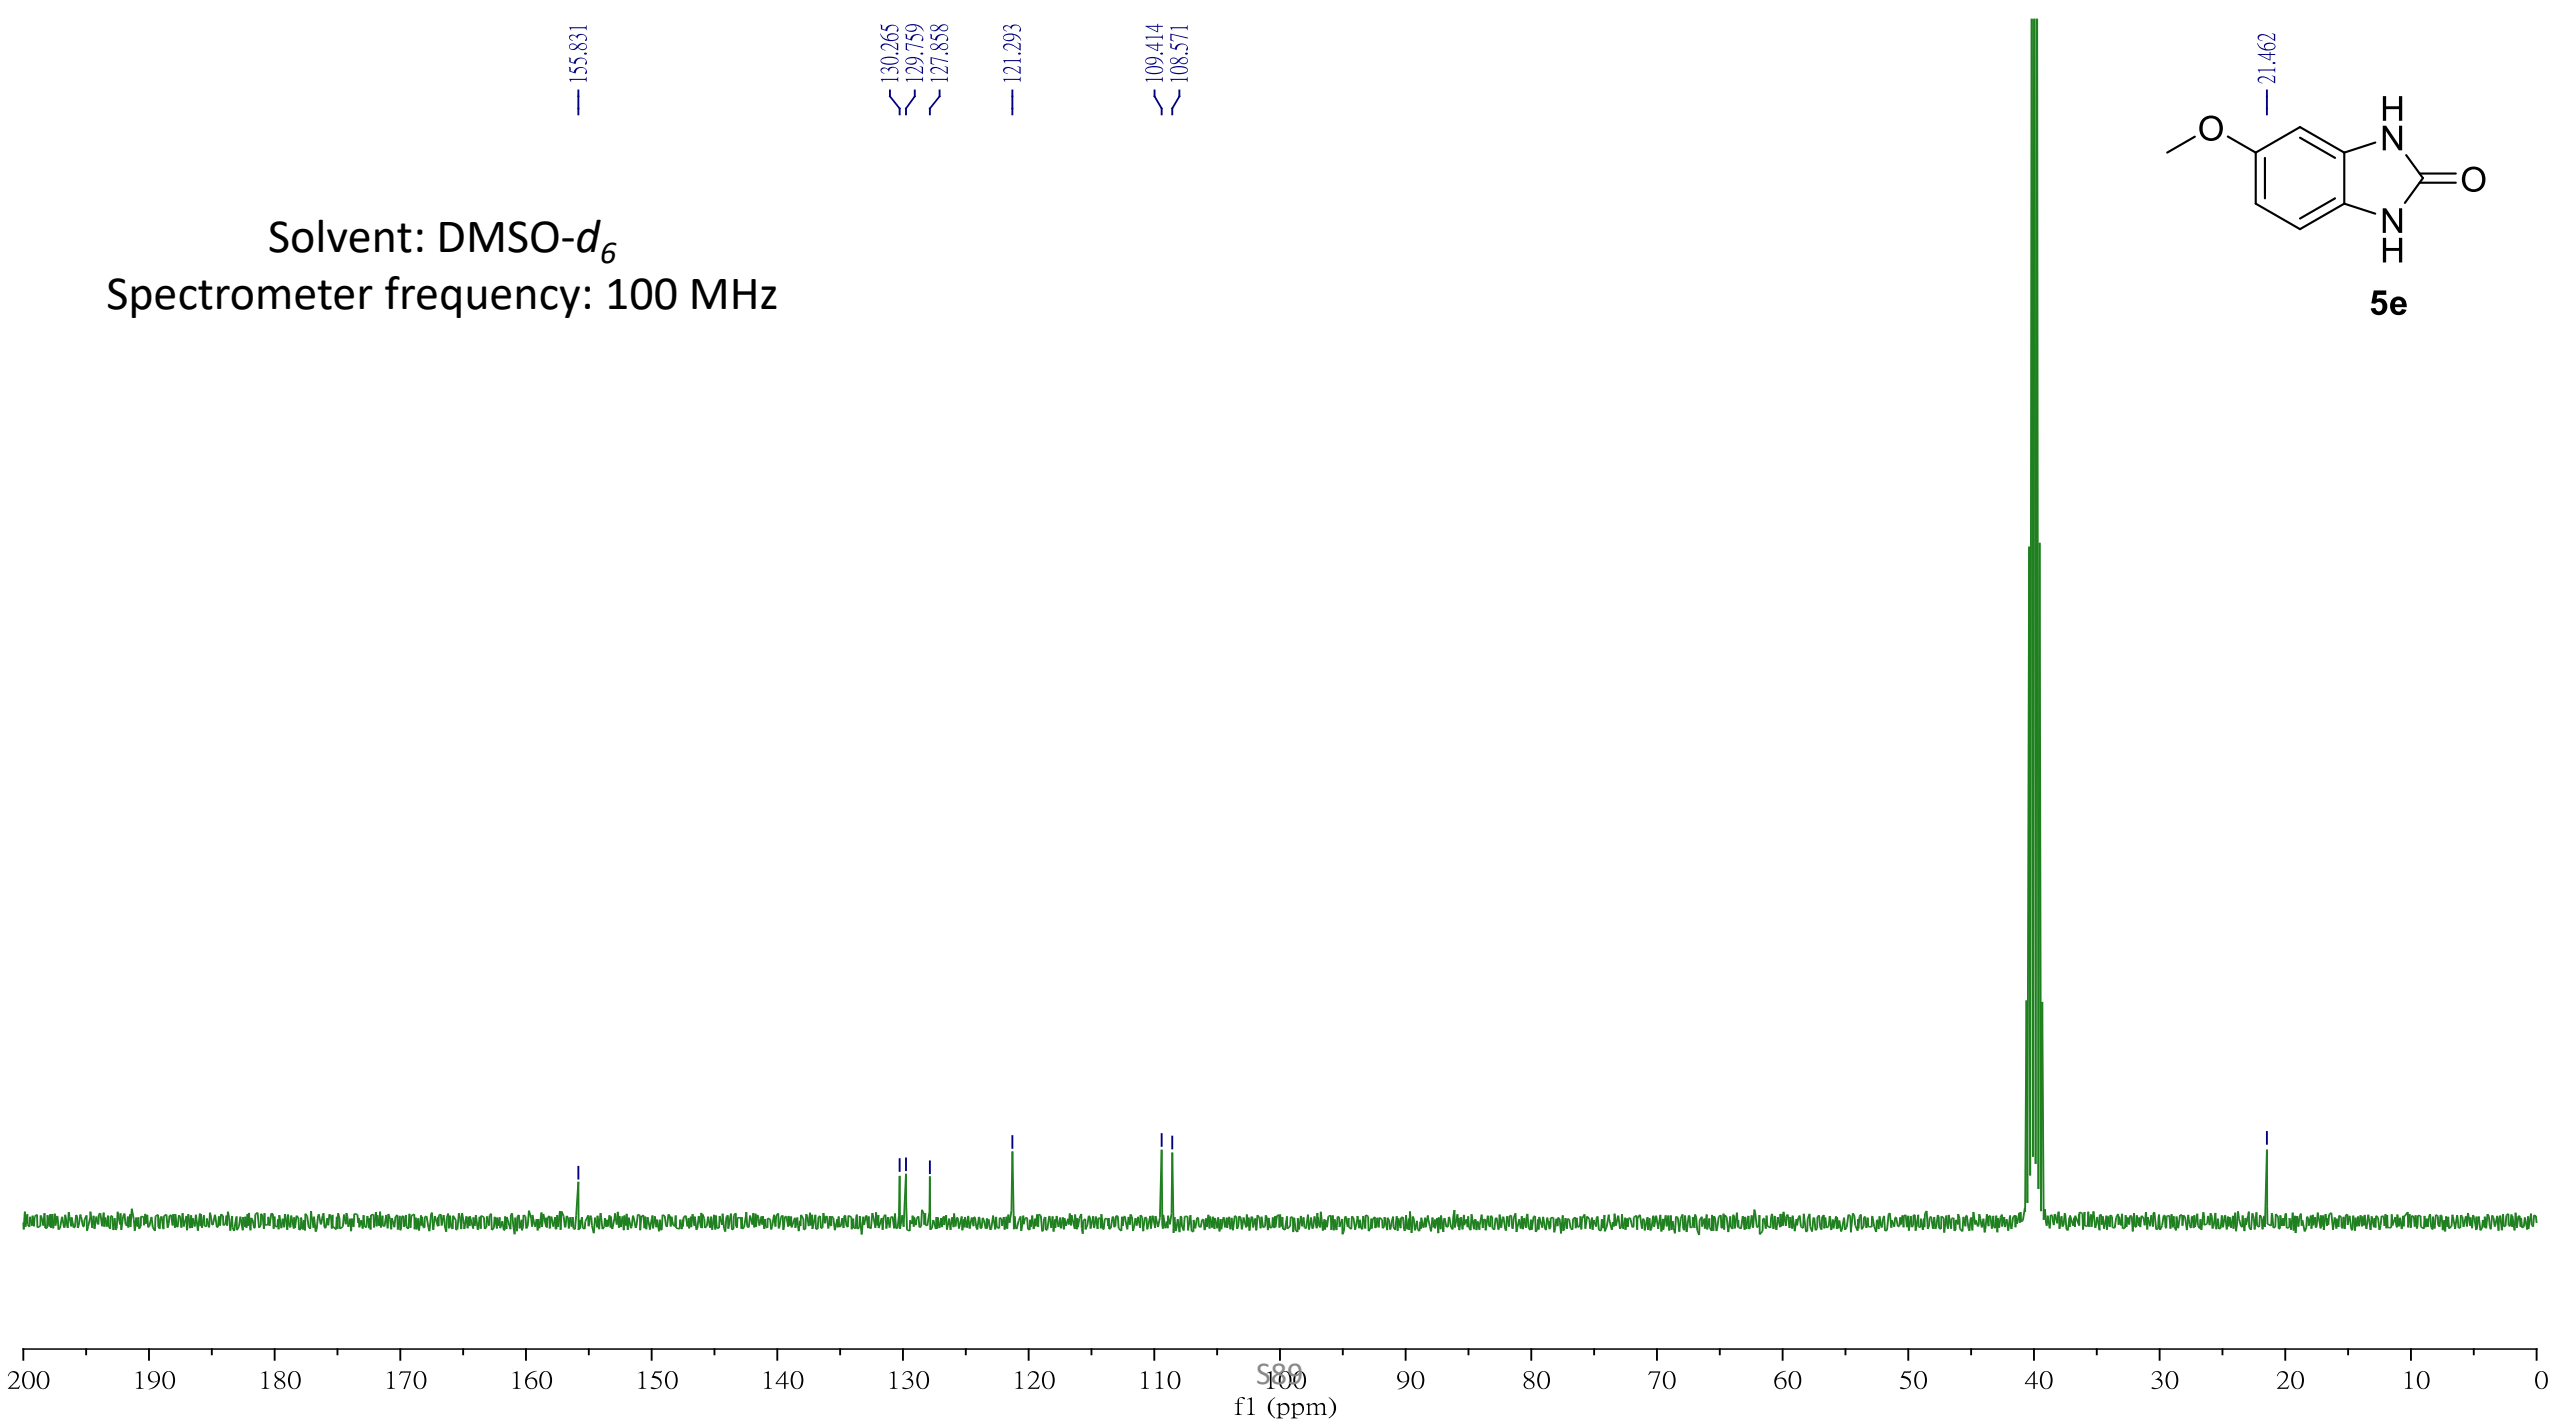

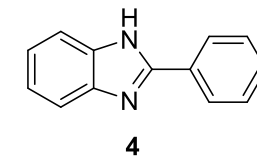

Solvent: DMSO- $d_6$   
Spectrometer frequency: 400 MHz

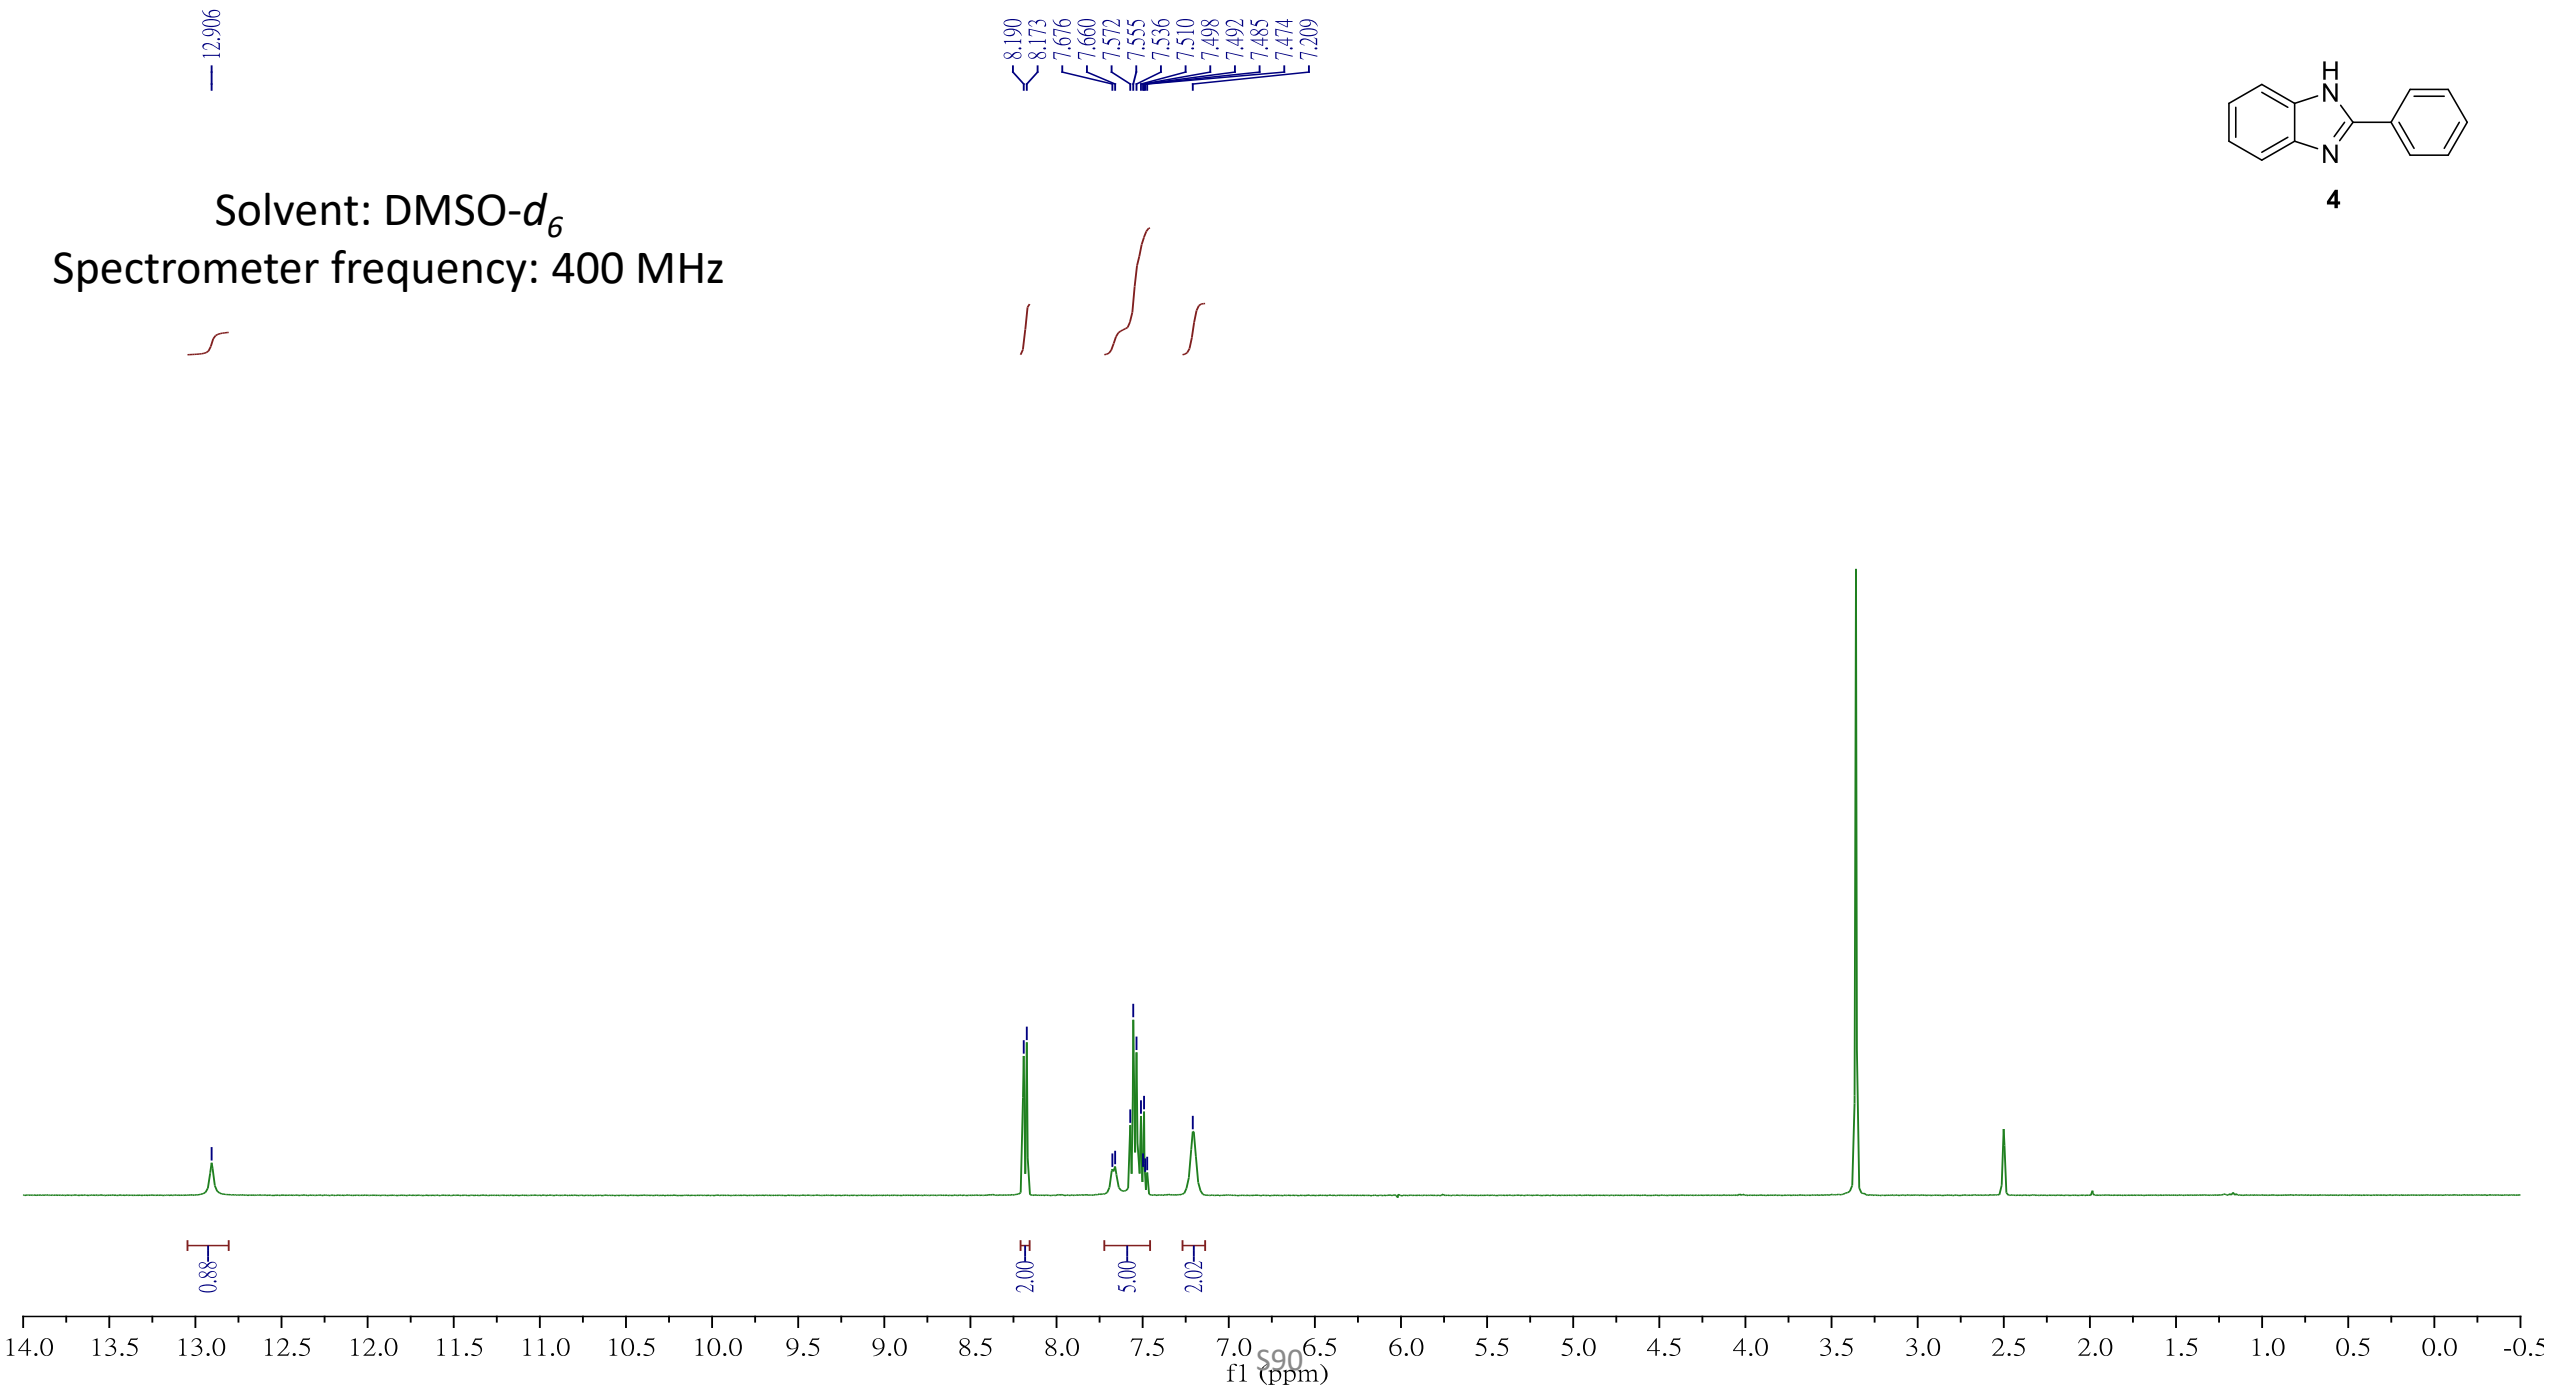

Solvent: DMSO-*d*<sub>6</sub>  
Spectrometer frequency: 100 MHz

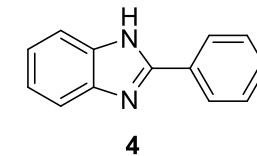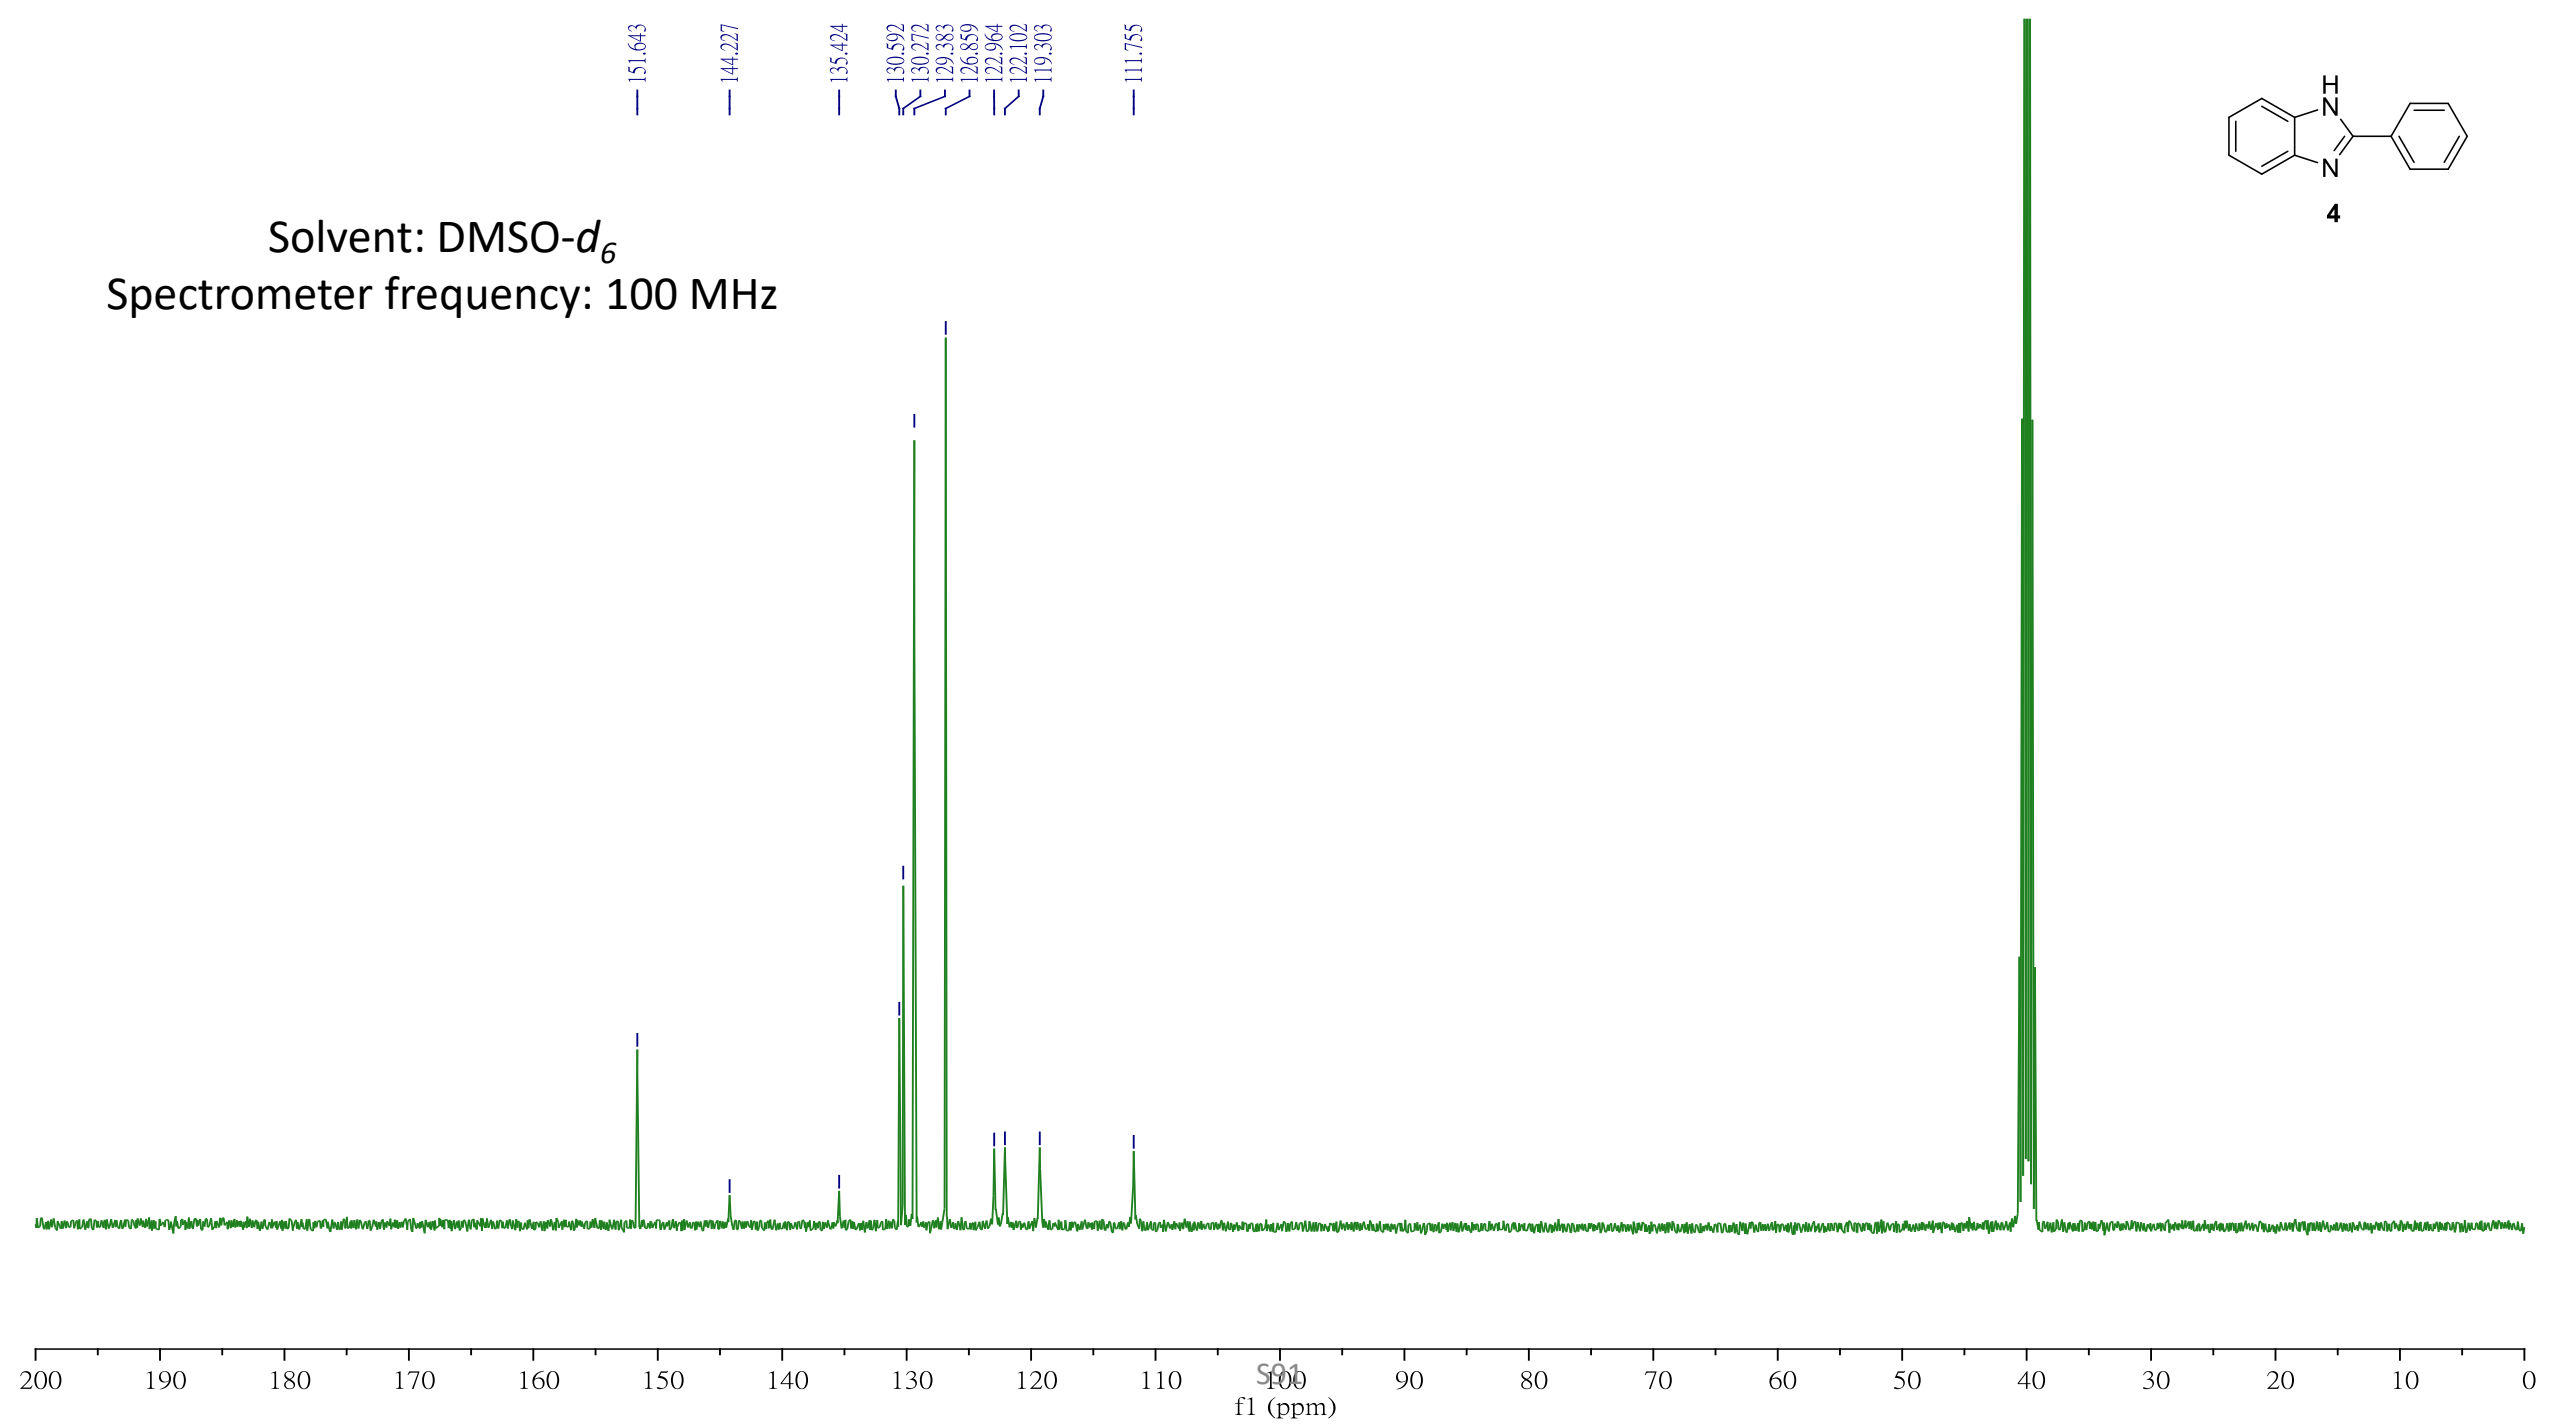

M0843-5  
aj

10.2977  
7.9657  
7.9610  
7.9558  
7.9449  
7.9396  
7.9347  
7.7642  
7.7608  
7.7419  
7.7389  
7.6362  
7.6316  
7.6262  
7.6151  
7.6099  
7.6058  
7.3676  
7.3631  
7.3578  
7.3442  
7.3412  
7.3274  
7.3224  
7.3174  
7.1192  
7.1162  
7.1128  
7.1005  
7.0974  
7.0815  
7.0787  
7.0755  
4.3899

Solvent: DMSO-*d*<sub>6</sub>  
Spectrometer frequency: 400 MHz

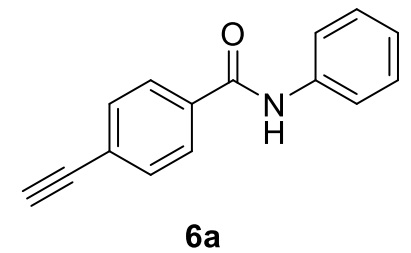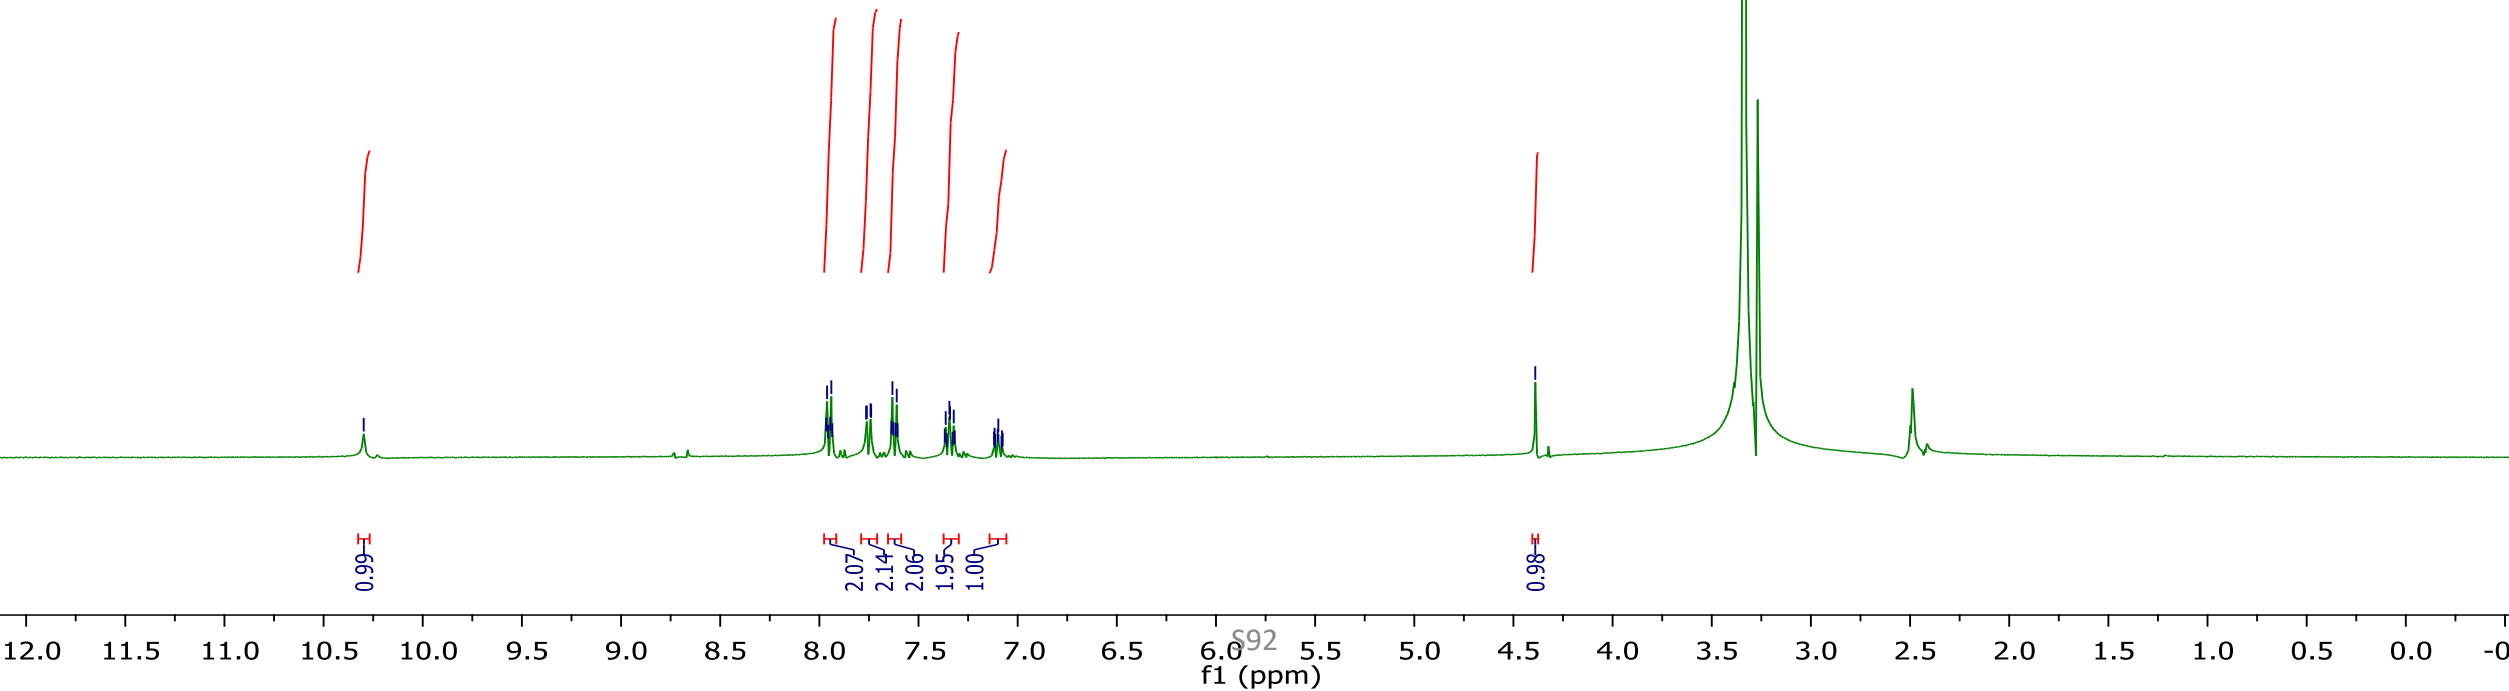

M0843-6  
aj

164.6699

138.9470  
134.9490  
131.6785  
128.6151  
127.9492  
124.7294  
123.8202  
120.3929

83.0476  
82.8359

Solvent: DMSO-*d*<sub>6</sub>  
Spectrometer frequency: 100 MHz

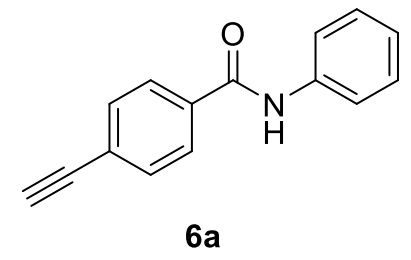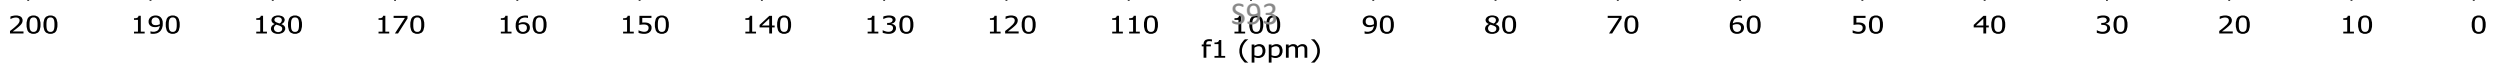

AJ-V-37  
single\_pulse

8.7488  
8.7445  
8.1351  
8.1131  
8.0119  
7.8926  
7.8877  
7.8707  
7.8659  
7.7848  
7.7799  
7.7290  
7.7142  
7.1686  
7.1642  
7.1525  
7.1491  
7.1455  
7.1376  
7.1324  
7.1269  
7.1183  
7.1144  
7.0994  
7.0951  
6.9869  
6.9817  
6.9714  
6.9679  
6.9644

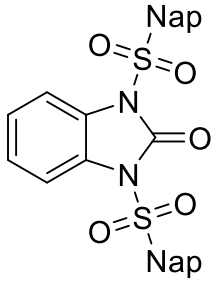

**6b**

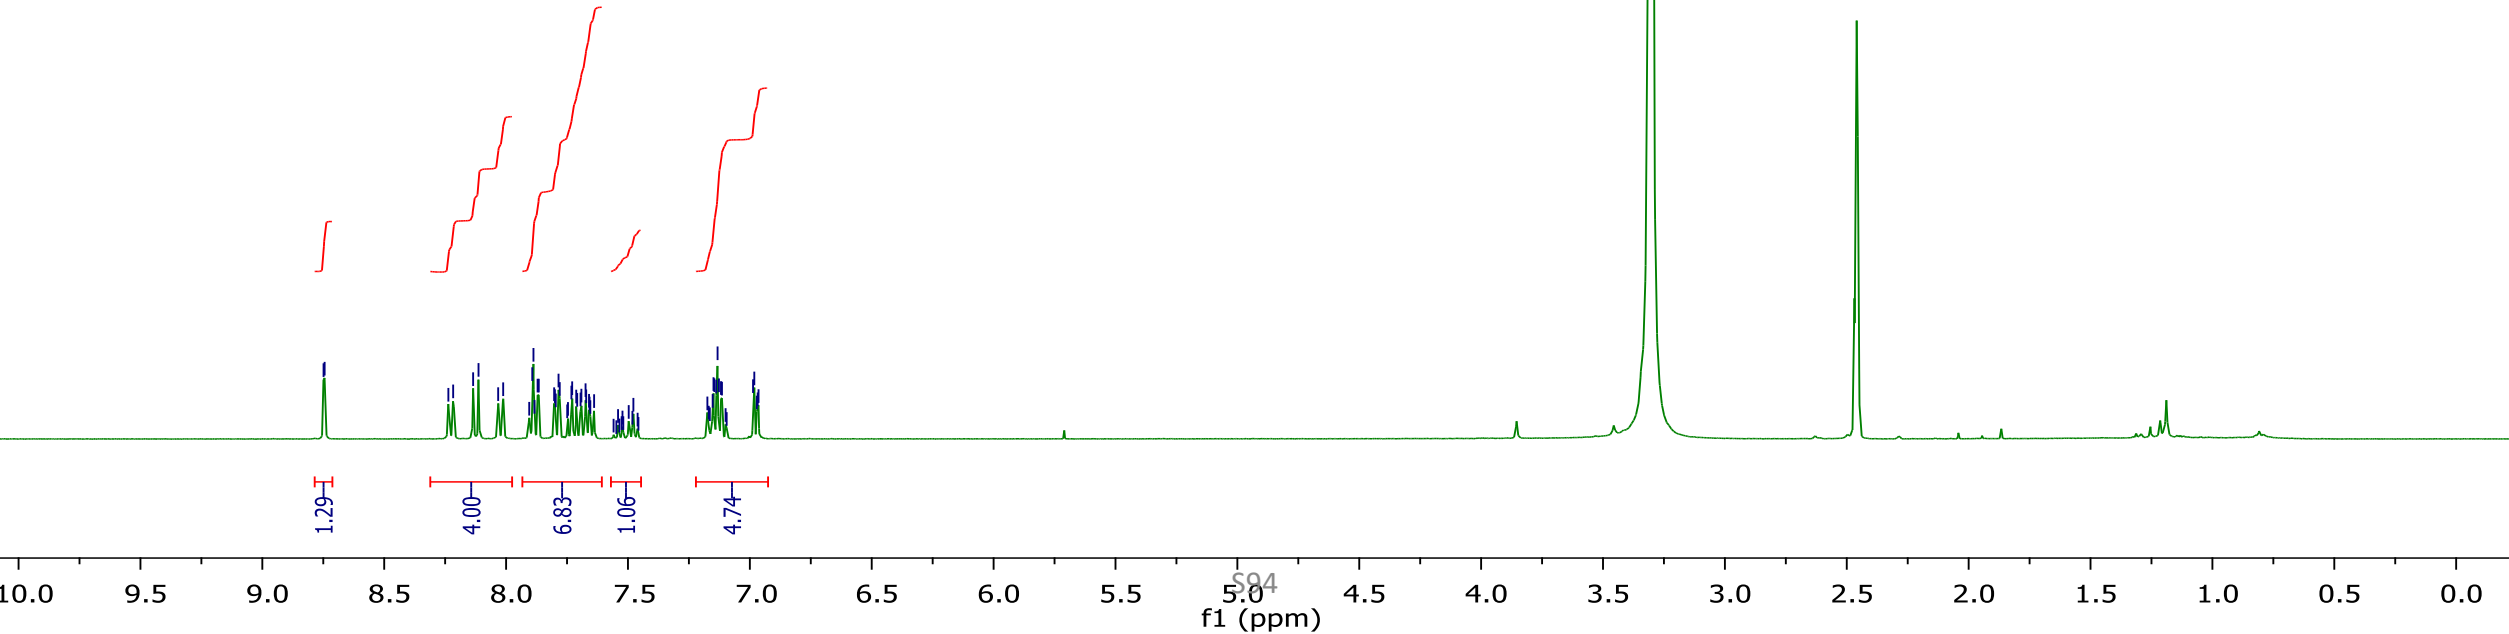

M0856-11  
AJ-V-37

- 150.9453
- 135.5818
- 131.8100
- 130.4237
- 129.8764
- 128.4009
- 126.9034
- 124.9822
- 122.4527
- 122.0069
- 112.8582
- 110.4777

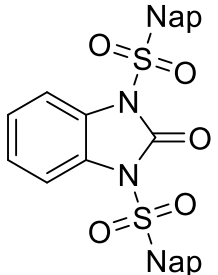

6b

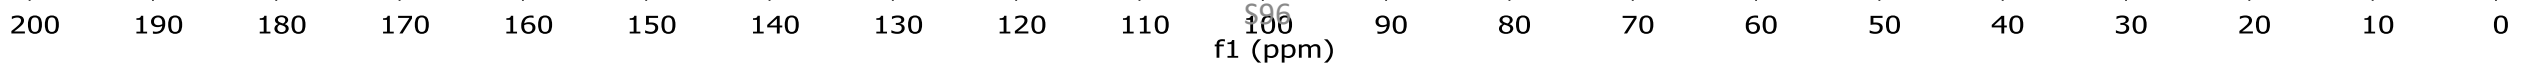

Supplement: d3nj04995g1.pdf [file d3nj04995g1.pdf]
